# Supplementary material for: Comparative transcriptomic analysis and functional characterization reveals that the class III peroxidase gene TaPRX-2A regulates drought stress tolerance in transgenic wheat
Source: Front Plant Sci. 2023 Feb 15;14:1119162. doi: 10.3389/fpls.2023.1119162 (PMC9976582; doi:10.3389/fpls.2023.1119162)
Supplement: Supplementary Table 1 — EXECL file with RNA-Seq data. [file Table1.xlsx]

## Sheet: All DEGs
ALL DEGs in RNA-Seq
ID	Liangxing66-CK1_fpkm	Liangxing66-CK2_fpkm	Liangxing66-CK3_fpkm	Liangxing66-D-1_fpkm	Liangxing66-D-2_fpkm	Liangxing66-D-3_fpkm	Ziyou5-CK1_fpkm	Ziyou5-CK2_fpkm	Ziyou5-CK3_fpkm	Ziyou5-D-1_fpkm	Ziyou5-D-2_fpkm	Ziyou5-D-3_fpkm	Liangxing66-CK1_count	Liangxing66-CK2_count	Liangxing66-CK3_count	Liangxing66-D-1_count	Liangxing66-D-2_count	Liangxing66-D-3_count	Ziyou5-CK1_count	Ziyou5-CK2_count	Ziyou5-CK3_count	Ziyou5-D-1_count	Ziyou5-D-2_count	Ziyou5-D-3_count	Liangxing66-CK_vs_Liangxing66-D.log2FoldChange	Liangxing66-CK_vs_Liangxing66-D.pvalue	Liangxing66-CK_vs_Liangxing66-D.padj	Liangxing66-CK_vs_Liangxing66-D.regulated	Ziyou5-CK_vs_Ziyou5-D.log2FoldChange	Ziyou5-CK_vs_Ziyou5-D.pvalue	Ziyou5-CK_vs_Ziyou5-D.padj	Ziyou5-CK_vs_Ziyou5-D.regulated	Liangxing66-CK_vs_Ziyou5-D.log2FoldChange	Liangxing66-CK_vs_Ziyou5-D.pvalue	Liangxing66-CK_vs_Ziyou5-D.padj	Liangxing66-CK_vs_Ziyou5-D.regulated	Ziyou5-CK_vs_Liangxing66-D.log2FoldChange	Ziyou5-CK_vs_Liangxing66-D.pvalue	Ziyou5-CK_vs_Liangxing66-D.padj	Ziyou5-CK_vs_Liangxing66-D.regulated	Liangxing66-CK_vs_Ziyou5-CK.log2FoldChange	Liangxing66-CK_vs_Ziyou5-CK.pvalue	Liangxing66-CK_vs_Ziyou5-CK.padj	Liangxing66-CK_vs_Ziyou5-CK.regulated	Liangxing66-D_vs_Ziyou5-D.log2FoldChange	Liangxing66-D_vs_Ziyou5-D.pvalue	Liangxing66-D_vs_Ziyou5-D.padj	Liangxing66-D_vs_Ziyou5-D.regulated	chr
ENSRNA050016680	13.63	12.42	12.6	15.19	19.08	15.43	7.29	9.35	14.38	7.66	5.96	5.31	110	95	98	122	144	118	53	73	110	60	47	42	0.708033	0.00394335	0.00755916	false	-0.57517	0.0773722	0.101373	false	-0.774865	0.00792785	0.0116894	false	0.857391	0.00245514	0.00427248	false	-0.209322	0.443984	0.561848	false	-1.44217	1.22624e-07	7.61535e-07	down	5D
ENSRNA050021560	12.13	18.63	16.6	27.43	17.11	13.1	13.47	20.81	7.86	9.38	7.9	10.42	44	64	58	99	58	45	44	73	27	33	28	37	0.645944	0.08513	0.122942	false	-0.471636	0.250458	0.296753	false	-0.51565	0.169505	0.204854	false	0.637929	0.120395	0.157433	false	-0.0554794	0.880844	0.918878	false	-1.11775	0.00345076	0.0108808	down	1A
TraesCS1A02G000400	0.27	0.3	0.36	0.56	0.77	0.81	0.33	0.33	0.13	0.38	0.27	0.32	36	38	46	74	95	101	39	42	16	48	35	41	1.53632	2.84803e-06	8.30384e-06	up	0.432268	0.303899	0.353139	false	0.293891	0.437679	0.485952	false	1.62425	1.36695e-05	3.05798e-05	up	-0.149922	0.718721	0.79891	false	-1.20157	0.000114982	0.000491229	down	1A
TraesCS1A02G000900	0.1	0.17	0.18	0.23	0.41	0.52	0.12	0.15	0.17	0.13	0.13	0.25	13	21	22	30	49	63	14	19	21	16	17	31	1.70906	0.000361788	0.000819088	up	NA	NA	NA	NA	NA	NA	NA	NA	1.55176	0.000830054	0.00153256	up	NA	NA	NA	NA	-1.23316	0.00710206	0.0206328	down	1A
TraesCS1A02G001000	0.14	0.22	0.12	0.24	0.68	0.44	0.2	0.17	0.2	0.33	0.14	0.43	14	21	12	24	64	42	18	17	19	32	14	42	1.83036	0.000426593	0.000956125	up	NA	NA	NA	NA	NA	NA	NA	NA	1.4149	0.00367204	0.00623734	up	NA	NA	NA	NA	-0.642684	0.18361	0.307389	false	1A
TraesCS1A02G001100	0.13	0.14	0.14	0.27	0.24	0.36	0.18	0.11	0.09	0.24	0.18	0.25	21	21	22	43	36	54	26	17	13	37	29	40	1.42537	0.00131552	0.00273713	up	NA	NA	NA	NA	NA	NA	NA	NA	1.39354	0.00272935	0.00472057	up	NA	NA	NA	NA	-0.407449	0.290311	0.433955	false	1A
TraesCS1A02G001400	0.11	0.25	0.07	0.2	0.46	0.64	0.09	0.1	0.12	0.17	0.15	0.19	12	26	7	22	47	66	9	11	12	18	16	20	1.95565	0.000611739	0.00134021	up	NA	NA	NA	NA	NA	NA	NA	NA	2.23375	3.74087e-05	8.03001e-05	up	NA	NA	NA	NA	-1.40542	0.00393786	0.0122263	down	1A
TraesCS1A02G002000	0.3	0.26	0.36	0.79	0.49	0.31	1.02	0.9	0.88	1.13	0.88	1.08	23	19	26	60	35	22	70	66	63	83	65	80	NA	NA	NA	NA	0.276151	0.310181	0.359655	false	1.99284	2.76025e-08	6.37974e-08	up	-0.621267	0.111055	0.146325	false	1.70615	9.22176e-07	4.64082e-06	up	0.889248	0.0164312	0.0428408	false	1A
TraesCS1A02G002100	2.16	3.3	3.72	0.88	1.2	0.69	2.48	2.68	3.45	1.1	0.85	0.93	256	370	425	104	133	78	265	307	387	126	98	108	-1.37939	2.91131e-08	1.02141e-07	down	-1.44567	5.92727e-15	2.05572e-14	down	-1.41834	6.08817e-11	1.65819e-10	down	-1.45581	5.32373e-11	1.82858e-10	down	0.0163808	0.92973	0.953196	false	0.000677342	0.997924	0.998641	false	1A
TraesCS1A02G002200	14.75	9.55	13.38	25.43	22.51	30.15	14.21	11.26	13.06	33.19	31.49	32.56	626	384	547	1074	893	1212	543	462	525	1366	1306	1353	1.40172	2.04668e-15	1.19218e-14	up	1.4749	1.38484e-56	1.29616e-55	up	1.61963	9.20702e-33	6.4108e-32	up	1.2054	5.37236e-17	2.74895e-16	up	0.135199	0.379212	0.498373	false	0.261205	0.0316079	0.0745797	false	1A
TraesCS1A02G002300	15.43	16.52	16.48	4.98	4.29	4.2	13.73	12.93	11.74	6.65	5.28	6.97	1315	1333	1353	422	342	339	1054	1066	948	550	440	582	-1.49242	5.41007e-28	5.60528e-27	down	-0.884772	1.06555e-15	3.82369e-15	false	-1.10089	1.50743e-21	7.16851e-21	down	-1.32734	5.32834e-23	3.75177e-22	down	-0.227049	0.0134306	0.0311394	false	0.43403	0.00447704	0.0136978	false	1A
TraesCS1A02G005000	15.79	20.54	15.15	1.83	3.03	2.49	9.09	8.38	8.12	1.36	1.42	1.03	1078	1328	996	124	193	161	559	553	525	90	95	69	-2.46598	1.59334e-43	2.66321e-42	down	-2.60761	3.04341e-60	2.98682e-59	down	-3.49635	2.50466e-100	5.36949e-99	down	-1.62763	1.53962e-20	9.60573e-20	down	-0.899836	6.02519e-14	6.27114e-13	false	-0.989709	8.14805e-05	0.000356551	false	1A
TraesCS1A02G005200	2.61	3.71	3.52	0.63	0.73	0.8	1.76	1.56	1.6	0.21	0.17	0.17	400	539	520	96	105	117	243	231	232	32	25	25	-1.8324	1.47299e-19	1.06229e-18	down	-3.02573	9.25151e-35	5.8375e-34	down	-3.90794	1.37222e-60	1.67427e-59	down	-1.00085	1.09131e-06	2.68299e-06	down	-0.893385	5.33834e-09	3.41362e-08	false	-2.03381	1.24821e-10	1.03357e-09	down	1A
TraesCS1A02G005400	0	0	0.07	3.41	2.52	1.96	0	0.05	0.07	0.26	0.36	0.18	0	0	4	192	133	105	0	3	4	14	20	10	7.11162	2.3697e-19	1.69081e-18	up	NA	NA	NA	NA	NA	NA	NA	NA	6.09237	3.35584e-22	2.27533e-21	up	NA	NA	NA	NA	-3.36262	3.43203e-20	6.87972e-19	down	1A
TraesCS1A02G005500	1.94	1.43	2.17	6.8	7.96	5.87	3.81	3.39	3.62	5.56	6.58	5.09	127	89	137	444	488	365	225	215	225	354	422	327	2.2421	1.97715e-28	2.08359e-27	up	0.810638	4.07269e-08	9.75639e-08	false	1.8915	9.62251e-23	4.81672e-22	up	1.11108	8.46445e-12	3.08346e-11	up	1.07076	4.58321e-08	2.66776e-07	up	-0.309598	0.0495519	0.108284	false	1A
TraesCS1A02G005700	0.51	0.39	0.46	1.18	1.25	1.35	0.56	0.56	0.81	0.67	1.02	0.72	62	45	54	143	142	155	61	66	93	79	121	85	1.81945	1.17441e-11	5.34682e-11	up	0.457028	0.0978069	0.125767	false	1.07208	0.000352218	0.000599793	up	1.15355	5.39043e-06	1.25071e-05	up	0.605258	0.041228	0.0819402	false	-0.704775	0.0034701	0.0109363	false	1A
TraesCS1A02G005800	7.19	7.31	6.67	34.35	37.79	34.82	5.08	5.95	5.79	26.13	24.18	26.3	909	876	813	4322	4466	4171	578	728	694	3204	2988	3257	2.6855	1.50327e-157	1.56797e-155	up	2.32348	3.27911e-209	1.14099e-207	up	2.1105	2.28464e-141	7.58028e-140	up	2.84804	8.89326e-187	1.08464e-184	up	-0.223857	0.0329839	0.0676965	false	-0.533258	5.97954e-11	5.1007e-10	false	1A
TraesCS1A02G006200	1.39	1.89	1.68	0.12	0.22	0.3	0.76	0.72	0.69	0.04	0.13	0.09	202	261	236	17	30	41	100	102	96	5	19	13	-2.62206	2.35677e-17	1.52393e-16	down	-2.93014	5.8631e-14	1.93962e-13	down	-3.99524	1.3348e-31	8.9968e-31	down	-1.60728	6.34728e-06	1.46289e-05	down	-1.07609	3.07744e-08	1.82337e-07	down	NA	NA	NA	NA	1A
TraesCS1A02G006300	1.43	1.32	0.99	0.17	0.17	0.07	0.69	0.61	0.53	0.09	0.09	0.11	229	200	152	27	25	10	100	94	80	14	14	18	-2.86275	1.39154e-16	8.64658e-16	down	-2.49614	4.04177e-12	1.22181e-11	down	-3.40965	1.24119e-25	6.92465e-25	down	-2.00068	3.06082e-07	7.87133e-07	down	-0.924734	2.09359e-05	8.75613e-05	false	NA	NA	NA	NA	1A
TraesCS1A02G006800	2.95	4.32	3.19	0.46	0.43	0.35	1.02	1.03	1.35	0.41	0.24	0.27	482	669	503	75	66	54	151	163	210	65	38	43	-2.71996	4.26268e-36	5.76918e-35	down	-1.75919	8.4353e-12	2.50514e-11	down	-3.25514	6.52066e-50	6.5992e-49	down	-1.2749	4.72e-07	1.19514e-06	down	-1.50659	3.84731e-19	6.30689e-18	down	-0.492549	0.146595	0.258803	false	1A
TraesCS1A02G007100	1.15	1.49	0.95	0.15	0.05	0.11	0.03	0.04	0.05	0	0	0	117	143	93	15	5	11	3	4	5	0	0	0	-3.13942	6.78998e-13	3.36682e-12	down	NA	NA	NA	NA	-9.07388	1.19385e-13	3.83246e-13	down	NA	NA	NA	NA	-4.72448	1.13313e-20	2.07594e-19	down	NA	NA	NA	NA	1A
TraesCS1A02G007500	18.86	17.69	20.69	30.16	27.57	32.24	21.23	22.61	22.33	36.33	34	35.75	933	829	986	1485	1275	1511	946	1082	1047	1743	1644	1732	1.0046	9.7473e-15	5.44513e-14	up	0.817695	1.38821e-29	7.75796e-29	false	1.14476	2.77301e-33	1.95611e-32	up	0.626689	2.32529e-08	6.51616e-08	false	0.316446	0.00123301	0.0037291	false	0.182949	0.0745508	0.151075	false	1A
TraesCS1A02G007800	13.64	19.32	19.1	0.32	1.36	2.9	1.88	0.98	1.9	0	0.22	0	129	173	174	3	12	26	16	9	17	0	2	0	-3.16675	6.42802e-13	3.19216e-12	down	NA	NA	NA	NA	-7.65015	5.10637e-13	1.58201e-12	down	NA	NA	NA	NA	-3.34797	1.1757e-23	2.64106e-22	down	NA	NA	NA	NA	1A
TraesCS1A02G007900	43.24	56.49	43.16	29.49	22.9	21.89	46.91	49.38	45.86	20.81	22.91	19.37	392	485	377	266	194	188	383	433	394	183	203	172	-0.586327	0.00267364	0.00527579	false	-1.0346	3.26322e-13	1.0418e-12	down	-0.921533	3.25332e-08	7.48583e-08	false	-0.75077	1.75761e-05	3.89351e-05	false	0.102201	0.45389	0.571339	false	-0.291639	0.138569	0.248039	false	1A
TraesCS1A02G008400	1.51	1.53	1.31	0.25	0.07	0.23	2.16	2.3	2.66	0.26	0.06	0.19	96	92	80	16	4	14	123	141	160	16	4	12	-2.60609	1.84503e-08	6.57351e-08	down	-3.64395	7.04061e-23	3.27972e-22	down	-2.81695	1.38855e-10	3.69173e-10	down	-3.4854	5.91769e-19	3.38185e-18	down	0.816082	0.000169137	0.000608118	false	NA	NA	NA	NA	1A
TraesCS1A02G009300	0.2	0.16	0.23	0.11	0.04	0.09	0.31	0.22	0.34	0.14	0.22	0.12	42	32	47	23	7	19	59	46	68	29	45	26	NA	NA	NA	NA	-0.710896	0.0507215	0.0686493	false	-0.0277002	0.946775	0.954931	false	-1.66798	0.000417364	0.000799313	down	0.67308	0.0434976	0.0857835	false	NA	NA	NA	NA	1A
TraesCS1A02G010300	1.05	0.88	0.54	1.46	1.11	0.93	1.09	1.31	1.63	1.4	2.01	1.75	62	49	31	86	61	52	58	75	91	80	116	101	0.856486	0.0225266	0.0372526	false	0.491403	0.0629069	0.0838071	false	1.31426	3.29338e-05	6.14376e-05	up	-0.017879	0.955421	0.963895	false	0.812823	0.0111666	0.0264843	false	0.501842	0.0860039	0.169667	false	1A
TraesCS1A02G011700	0	0.14	0.14	3.47	2.82	1.29	0.4	0.23	0.34	3.89	3.39	2.55	0	3	3	76	58	27	8	5	7	83	73	55	5.10394	4.49889e-11	1.96287e-10	up	3.47946	1.72873e-13	5.58513e-13	up	5.38246	1.79468e-14	6.04122e-14	up	3.15092	2.18931e-08	6.14757e-08	up	NA	NA	NA	NA	0.318813	0.388425	0.536559	false	1A
TraesCS1A02G012000	0.85	1.26	0.99	0.42	0.22	0.24	1.07	1.05	0.93	0.2	0.38	0.15	82	115	92	40	20	22	93	98	85	19	36	14	-1.45174	0.000150477	0.000358887	down	-1.919	7.91229e-08	1.86282e-07	down	-1.82077	2.03987e-06	4.18506e-06	down	-1.60204	9.13327e-06	2.07763e-05	down	0.0875004	0.719709	0.799646	false	NA	NA	NA	NA	1A
TraesCS1A02G012600	3.6	4.33	3.45	0.92	0.12	0.15	0.94	1.09	1.11	0.19	0.26	0.33	157	179	145	40	5	6	37	46	46	8	11	14	-2.87093	0.00134619	0.00279639	down	-1.88401	6.94413e-05	0.000131534	down	-3.6192	1.37461e-23	7.12091e-23	down	-1.18876	0.0580521	0.0809661	false	-1.7454	1.58701e-12	1.44385e-11	down	NA	NA	NA	NA	1A
TraesCS1A02G013600	0	0	0	2.37	1.47	2.33	0	0	0	1.82	1.87	2.04	0	0	0	79	46	74	0	0	0	59	61	67	8.86497	1.55251e-12	7.52124e-12	up	8.48528	6.84686e-12	2.04368e-11	up	8.65142	3.3158e-12	9.76017e-12	up	8.64696	4.84356e-12	1.79512e-11	up	NA	NA	NA	NA	-0.168546	0.59585	0.720984	false	1A
TraesCS1A02G013800	16.83	19.93	16.69	1.68	2.22	2.09	7.93	7.56	8.84	1.58	1.6	1.81	3048	3419	2913	303	376	358	1293	1324	1517	277	283	321	-2.8107	5.68752e-107	3.10036e-105	down	-2.14872	3.74837e-100	5.80506e-99	down	-3.16582	3.11862e-201	1.76299e-199	down	-1.84412	8.7711e-48	1.35762e-46	down	-1.02776	5.40684e-30	1.72984e-28	down	-0.313968	0.0466056	0.102909	false	1A
TraesCS1A02G014300	0	0	0	0.24	0.31	0.4	0	0	0	0.47	0.78	0.29	0	0	0	24	30	39	0	0	0	47	78	29	NA	NA	NA	NA	8.20652	1.0656e-10	2.9732e-10	up	8.37244	5.6902e-11	1.55334e-10	up	NA	NA	NA	NA	NA	NA	NA	NA	0.648854	0.135919	0.24434	false	1A
TraesCS1A02G015100	24.9	25.31	28.17	7.64	6.84	8.59	24.13	20.1	19.63	2.08	2.54	2.63	802	772	874	245	206	262	700	626	599	65	80	83	-1.41138	4.32069e-19	3.0435e-18	down	-2.9996	2.25738e-78	2.76164e-77	down	-3.17817	2.61986e-87	4.73596e-86	down	-1.28401	3.6712e-16	1.78311e-15	down	-0.189365	0.0930808	0.162361	false	-1.72405	1.96741e-15	2.61361e-14	down	1A
TraesCS1A02G015300	13.15	15.69	13.82	35.19	36.6	38.6	10.82	12.47	11.59	37.83	39.86	37.23	637	720	645	1696	1657	1771	472	584	532	1777	1887	1766	1.72304	1.473e-47	2.72602e-46	up	1.85669	2.14345e-110	3.65452e-109	up	1.68622	4.20694e-70	5.93456e-69	up	1.84278	4.41646e-62	9.48858e-61	up	-0.181523	0.114518	0.192596	false	0.00558592	0.951732	0.971065	false	1A
TraesCS1A02G015400	0.79	0.62	0.8	1.88	1.89	1.36	0.83	0.33	0.29	3.05	2.98	2.28	35	26	34	83	78	57	33	14	12	131	129	99	1.5635	1.66028e-05	4.45771e-05	up	2.67698	5.45124e-14	1.80708e-13	up	2.16672	6.17729e-13	1.90401e-12	up	2.0208	3.06795e-06	7.26917e-06	up	NA	NA	NA	NA	0.644731	0.0152718	0.0402239	false	1A
TraesCS1A02G015900	0.77	1.09	0.65	3.3	4.02	4.08	0.49	0.52	0.34	4.6	3.8	4.61	112	151	92	480	549	564	65	73	47	652	542	660	2.53328	2.74537e-38	3.95692e-37	up	3.4058	1.56752e-87	2.11748e-86	up	2.63181	3.15869e-51	3.27175e-50	up	3.25611	3.91142e-62	8.41543e-61	up	-0.784953	0.00450357	0.0119057	false	0.140184	0.297499	0.441786	false	1A
TraesCS1A02G016900	5.65	6.8	6.15	19.46	21.52	21.22	5.85	5.66	6.51	19.05	16.72	16.95	485	553	509	1664	1728	1727	453	470	530	1587	1404	1426	2.09281	3.5512e-69	1.04877e-67	up	1.68627	1.06959e-75	1.27123e-74	up	1.76059	3.73998e-62	4.69011e-61	up	1.96796	1.00318e-73	2.72496e-72	up	0.0634238	0.598689	0.701482	false	-0.29047	0.0027401	0.00887251	false	1A
TraesCS1A02G017900	2.71	3.75	3.35	0.88	0.57	0.9	2.84	2.5	2.09	0.78	1.37	0.99	244	319	290	79	48	77	230	217	178	68	120	87	-1.69584	2.03224e-11	9.0918e-11	down	-1.10646	9.99665e-07	2.18613e-06	down	-1.38851	8.28908e-10	2.09555e-09	down	-1.46584	1.04247e-08	3.00178e-08	down	-0.29308	0.0915841	0.160215	false	0.35195	0.261126	0.401306	false	1A
TraesCS1A02G018000	0.47	0.68	0.54	0.13	0.01	0.01	0.39	0.41	0.49	0.04	0.07	0.02	39	53	43	11	1	1	29	33	38	3	6	2	-3.01154	3.28719e-05	8.53209e-05	down	NA	NA	NA	NA	-3.37159	1.7469e-07	3.84215e-07	down	NA	NA	NA	NA	-0.280976	0.436721	0.555114	false	NA	NA	NA	NA	1A
TraesCS1A02G018600	2.71	3.29	3.6	0.11	0.22	0.29	2.77	2.24	2.78	0.32	0.56	0.57	227	261	290	9	17	23	209	181	220	26	46	47	-3.62231	1.88399e-28	1.9872e-27	down	-2.27911	1.22323e-19	5.12673e-19	down	-2.4646	5.90493e-22	2.8633e-21	down	-3.48743	1.29938e-26	1.06881e-25	down	-0.196002	0.250515	0.361003	false	1.19724	0.0170616	0.0442421	up	1A
TraesCS1A02G019000	52.01	53.79	50.3	99.55	88.49	93.49	53.38	56.57	51.74	98.76	102.4	98.56	2735	2679	2548	5209	4349	4657	2528	2877	2578	5036	5262	5075	1.20419	1.43426e-29	1.56801e-28	up	1.02736	7.63265e-77	9.17395e-76	up	1.19668	4.39114e-68	6.02683e-67	up	0.983642	8.48304e-24	6.18009e-23	false	0.158668	0.0319709	0.0659237	false	0.0355888	0.687255	0.792576	false	1A
TraesCS1A02G019200	2.43	1.95	2.44	1.81	1.83	1.71	3.93	4.22	3.89	3.68	4.29	3.47	183	139	177	136	129	122	267	308	278	269	316	256	0.000564399	0.998025	0.998448	false	0.0618314	0.670878	0.71245	false	1.00116	3.74537e-08	8.58784e-08	up	-0.989511	9.46249e-08	2.53506e-07	false	0.928958	1.927e-08	1.1659e-07	false	1.04281	2.1788e-08	1.45704e-07	up	1A
TraesCS1A02G020300	4.57	4.82	4.58	2.34	1.82	2.53	4.67	5.48	5.34	2.86	3.23	3.43	204	204	197	104	76	107	188	237	226	124	141	150	-0.706424	0.00294045	0.00576469	false	-0.566328	0.00155299	0.00257479	false	-0.297088	0.121867	0.151312	false	-1.02704	4.84765e-06	1.12917e-05	down	0.258892	0.11358	0.191291	false	0.452955	0.0591619	0.125408	false	1A
TraesCS1A02G020900	7.44	7.85	7.42	5.53	5.58	5.58	11.35	10.27	10.03	4.35	4.61	2.19	104	104	100	77	73	74	143	139	133	59	63	30	-0.09225	0.735896	0.783148	false	-1.36781	7.99509e-07	1.76146e-06	down	-0.770101	0.0149153	0.0212297	false	-0.740624	0.00246417	0.00428744	false	0.586663	0.00446718	0.0118228	false	-0.635348	0.0586746	0.124564	false	1A
TraesCS1A02G022500	0	0	0	0	0	0	7.4	7.85	6.97	6.95	7.32	6.55	0	0	0	0	0	0	524	597	519	530	562	504	NA	NA	NA	NA	0.0426957	0.691939	0.731663	false	11.7453	4.51537e-23	2.29248e-22	up	-11.3865	1.04921e-21	6.94028e-21	down	11.6919	6.3533e-23	1.35977e-21	up	11.4205	7.41335e-22	1.67807e-20	up	1A
TraesCS1A02G024300	7.58	8.45	8.09	3.64	3.21	3.46	3.64	2.81	3.6	0.76	0.81	0.69	391	413	402	187	155	169	169	140	176	38	41	35	-0.871692	1.01362e-06	3.09444e-06	false	-2.00947	3.47427e-15	1.21764e-14	down	-3.15625	4.25374e-50	4.31929e-49	down	0.224229	0.283064	0.33894	false	-1.15778	7.69604e-14	7.91803e-13	down	-2.24162	5.15746e-18	8.74013e-17	down	1A
TraesCS1A02G024600	4.63	4.28	5.23	2.22	1.39	1.52	3.42	3.65	4.31	0.87	0.49	0.68	203	178	221	97	57	63	135	155	179	37	21	29	-1.10498	3.59139e-05	9.27722e-05	down	-2.3464	6.39093e-17	2.4139e-16	down	-2.5429	1.16612e-19	5.10775e-19	down	-0.959449	0.000347265	0.00067101	false	-0.20672	0.261097	0.373005	false	-1.39416	0.000198253	0.000813087	down	1A
TraesCS1A02G025200	4.94	6.81	5.21	8.83	10.1	9.38	5.76	6.07	6.29	13	11.87	11.66	444	579	451	789	848	798	466	527	535	1132	1042	1025	1.08982	9.8532e-14	5.15914e-13	up	1.1487	3.81577e-35	2.42951e-34	up	1.36449	4.47847e-28	2.70852e-27	up	0.823515	3.87232e-12	1.44627e-11	false	0.204593	0.122268	0.203239	false	0.316311	0.00304757	0.00975052	false	1A
TraesCS1A02G025600	2.08	2.08	2.42	0.53	0.63	0.34	1.86	1.97	1.75	1.1	1.2	1.37	313	296	350	79	89	49	252	286	249	160	176	201	-1.78144	9.24268e-14	4.84549e-13	down	-0.470231	0.0037548	0.00595829	false	-0.590508	0.000564898	0.000944169	false	-1.71132	2.7257e-13	1.10132e-12	down	-0.130757	0.371678	0.490613	false	1.23153	1.04865e-06	5.94369e-06	up	1A
TraesCS1A02G025800	0.23	0.45	0.48	0.41	0.72	0.62	1.24	0.79	1.04	0.73	0.33	0.57	14	26	28	25	41	36	68	47	60	43	20	34	NA	NA	NA	NA	-0.773886	0.0392424	0.054045	false	NA	NA	NA	NA	-0.633238	0.097724	0.130295	false	1.51954	8.46042e-05	0.000320462	up	-0.150882	0.734027	0.827127	false	1A
TraesCS1A02G026200	2.92	3.63	3.58	1.02	1.13	1.02	1.96	1.88	1.72	2.79	2.55	2.72	464	547	549	161	168	154	281	289	259	430	396	423	-1.32659	2.19683e-14	1.1983e-13	down	0.671997	1.78821e-07	4.11708e-07	false	-0.0748152	0.573533	0.618429	false	-0.630493	0.000447423	0.000854027	false	-0.75775	2.69488e-08	1.60381e-07	false	1.29327	2.53713e-16	3.65898e-15	up	1A
TraesCS1A02G026400	11.4	13.8	11.92	7.76	10.98	8.79	7.94	7.69	9.83	17.23	15.78	16.75	2182	2501	2197	1477	1964	1593	1369	1423	1782	3197	2951	3138	-0.0861863	0.496129	0.565926	false	1.1044	1.56723e-42	1.1568e-41	up	0.679374	1.2821e-15	4.60553e-15	false	0.288926	0.0230919	0.0346441	false	-0.435791	2.0517e-05	8.59436e-05	false	0.805863	1.9921e-13	2.19081e-12	false	1A
TraesCS1A02G028600	0.75	0.83	0.66	0.58	0.56	0.62	0.48	0.61	0.44	1.03	0.83	1.03	135	141	114	103	94	106	77	105	74	180	145	181	0.00440777	0.985885	0.989018	false	1.06608	1.28311e-06	2.78485e-06	up	0.623467	0.00297568	0.00461206	false	0.395974	0.137885	0.178079	false	-0.453524	0.0514774	0.098953	false	0.661539	0.00260848	0.0084927	false	1A
TraesCS1A02G028900	2.11	2.92	1.83	2.05	1.55	1.57	1.53	1.87	1.91	4.07	3.25	3.6	305	401	255	295	210	215	200	262	262	571	460	510	-0.0494684	0.818192	0.853783	false	1.17432	2.16704e-17	8.35601e-17	up	0.928691	2.37405e-08	5.50907e-08	false	0.145173	0.456112	0.515201	false	-0.257042	0.150834	0.240867	false	1.02159	8.11417e-10	6.16142e-09	up	1A
TraesCS1A02G029800	3.84	2.3	2.8	6.15	6.67	5.86	3.34	2.91	2.88	7.16	7.24	7.02	294	167	206	468	477	425	230	215	209	531	541	526	1.40786	6.53735e-13	3.24428e-12	up	1.36889	1.84615e-27	9.78444e-27	up	1.51113	1.40351e-18	5.84563e-18	up	1.21466	2.18179e-15	1.00849e-14	up	0.132831	0.493814	0.608677	false	0.145036	0.248349	0.386288	false	1A
TraesCS1A02G030000	26.47	28.35	25.88	34.78	27.05	32.72	41.06	40.21	38.73	10.91	13.33	11.68	1136	1152	1070	1485	1085	1330	1587	1669	1575	454	559	491	0.584776	1.94818e-05	5.19035e-05	false	-1.60263	1.21502e-71	1.37476e-70	down	-0.911764	2.39931e-16	8.94163e-16	false	-0.157772	0.198063	0.246749	false	0.680299	2.20818e-16	2.87556e-15	false	-1.4525	5.57553e-27	1.72772e-25	down	1A
TraesCS1A02G030400	24.11	24.06	27.23	8.21	9.15	9.4	22.82	21.85	23.57	3.24	2.23	3.56	1272	1202	1384	431	451	470	1084	1115	1178	166	115	184	-1.14587	1.28732e-18	8.86794e-18	down	-2.77921	9.47416e-102	1.48694e-100	down	-2.80583	4.0693e-81	6.74714e-80	down	-1.16978	6.16407e-24	4.52104e-23	down	-0.0372175	0.683069	0.771009	false	-1.61862	2.18273e-19	4.14001e-18	down	1A
TraesCS1A02G030600	15.46	16.39	15.1	21.6	21.08	23.26	16.37	16.41	15.82	27.64	27.05	28.18	492	494	463	684	627	701	469	505	477	853	841	878	0.841785	7.79911e-10	3.09719e-09	false	0.907239	3.42715e-22	1.5617e-21	false	1.07515	8.93643e-24	4.66506e-23	up	0.622768	8.56803e-07	2.12459e-06	false	0.157262	0.16656	0.261227	false	0.276001	0.0137852	0.0368639	false	1A
TraesCS1A02G031300	4.78	4.64	3.95	0.46	0.35	0.22	3.62	3.52	3.76	0.14	0.08	0.22	1171	1076	933	113	81	50	798	833	873	34	18	53	-3.33834	1.20489e-57	2.79826e-56	down	-4.49545	7.04122e-34	4.36255e-33	down	-4.67313	7.50831e-34	5.37617e-33	down	-3.21141	1.14384e-59	2.3212e-58	down	-0.188397	0.0615005	0.114909	false	-1.29163	0.00143167	0.00494063	down	1A
TraesCS1A02G033200	3.76	5.09	4.5	7.7	6.62	7.05	3.13	3.3	2.79	5.73	6.27	5.62	314	402	362	639	516	557	235	266	221	464	511	459	1.03348	2.06705e-10	8.56712e-10	up	1.07149	2.53752e-16	9.34529e-16	up	0.657458	3.5904e-06	7.23426e-06	false	1.39622	8.96616e-20	5.36847e-19	up	-0.425047	0.00596558	0.0152857	false	-0.332862	0.0124782	0.0338299	false	1A
TraesCS1A02G033500	4.69	3.47	5.46	35.4	33.99	39.59	6.84	7.06	6.85	15.36	14.58	13.89	167	117	187	1253	1130	1334	219	243	231	530	507	484	3.34896	4.09182e-88	1.67173e-86	up	1.21619	2.72258e-22	1.24416e-21	up	1.93905	3.50015e-30	2.2608e-29	up	2.57531	5.30789e-87	1.80709e-85	up	0.712437	0.000167974	0.000604119	false	-1.36741	1.08409e-31	4.13299e-30	down	1A
TraesCS1A02G033600	0.06	0	0	1.19	0.74	1.08	0.45	0.49	0.17	1.75	1.42	0.86	3	0	0	58	34	50	20	23	8	83	68	41	5.9388	9.89239e-10	3.89962e-09	up	1.99325	5.2888e-06	1.09796e-05	up	6.25263	2.63006e-11	7.32284e-11	up	1.62625	0.000845546	0.00156002	up	NA	NA	NA	NA	0.359245	0.326954	0.473184	false	1A
TraesCS1A02G033800	1.66	1.04	1.11	0.66	0.29	0.68	1.35	1.14	1.26	0.75	0.58	0.56	93	55	60	37	15	36	68	62	67	41	32	31	-0.864738	0.0460457	0.0709808	false	-0.841091	0.0102384	0.0153557	false	-0.748113	0.0391274	0.0526042	false	-1.01015	0.0121319	0.019094	down	0.0823671	0.777795	0.844075	false	NA	NA	NA	NA	1A
TraesCS1A02G034300	4.06	2.69	3.56	2.34	1.12	1.73	3.69	2.98	3	3.21	4.43	4.32	392	246	331	225	101	158	321	278	274	300	418	408	-0.629421	0.0170663	0.0289877	false	0.444817	0.00382109	0.00605767	false	0.465039	0.0100634	0.0146562	false	-0.702449	0.00387318	0.00655919	false	0.0103563	0.951462	0.967477	false	1.1405	1.02448e-06	5.81305e-06	up	1A
TraesCS1A02G034700	2.19	1.55	1.32	0.24	1.02	0.38	2.78	1.23	2.65	0.37	0.86	1.18	55	37	32	6	24	9	63	30	63	9	21	29	NA	NA	NA	NA	-1.33042	0.00449958	0.0070683	down	NA	NA	NA	NA	-1.86139	0.000682559	0.0012748	down	0.4967	0.188989	0.288738	false	NA	NA	NA	NA	1A
TraesCS1A02G035100	2.11	1.89	2.95	0.92	1.15	0.78	2.53	2.39	2.1	1.46	2.15	1.92	169	143	227	73	86	59	182	185	159	113	168	150	-0.943393	0.000604852	0.00132645	false	-0.207955	0.297465	0.346318	false	-0.0775082	0.739281	0.772247	false	-1.124	3.88532e-06	9.13139e-06	down	0.120208	0.551521	0.660672	false	0.906603	0.000488363	0.001858	false	1A
TraesCS1A02G035200	0.4	0.2	0.45	0.52	0.32	0.17	0.44	1.03	0.91	0.18	0.1	0.36	29	14	32	38	22	12	29	73	63	13	7	26	NA	NA	NA	NA	-1.75236	0.000379273	0.000671033	down	NA	NA	NA	NA	-1.03932	0.0320192	0.0469055	down	1.28436	0.00246904	0.00695821	up	NA	NA	NA	NA	1A
TraesCS1A02G035800	51.97	42.41	50.17	92.91	60.78	81.79	49.93	59.75	56.18	92.56	101.46	85.07	1528	1181	1421	2718	1670	2278	1322	1699	1565	2639	2915	2449	1.06127	6.00698e-11	2.5944e-10	up	0.887495	1.28067e-27	6.8153e-27	false	1.20292	4.76791e-32	3.25327e-31	up	0.6943	2.64957e-06	6.30939e-06	false	0.305111	0.00336313	0.00918565	false	0.186462	0.182009	0.305264	false	1A
TraesCS1A02G036100	38.99	46.62	40.1	7.27	8.36	8.65	33.89	33.06	33.58	6.83	6.51	7.39	3806	4310	3771	706	763	800	2979	3121	3106	647	621	706	-2.02219	3.45629e-69	1.02125e-67	down	-2.1403	4.16251e-207	1.42838e-205	down	-2.34372	1.17858e-141	3.91899e-140	down	-1.86967	5.2854e-81	1.63535e-79	down	-0.214205	0.00578441	0.0148694	false	-0.279706	0.0184243	0.0472353	false	1A
TraesCS1A02G036200	32.5	32.84	35.52	12.43	14.35	16.12	33.83	35.9	33.45	7.94	9.08	7.19	1490	1426	1569	567	615	700	1397	1592	1453	353	407	323	-0.884901	1.1858e-11	5.39744e-11	false	-1.95387	3.00455e-88	4.08647e-87	down	-1.80296	1.56689e-56	1.78148e-55	down	-1.08662	6.37596e-20	3.85254e-19	down	0.140377	0.0966526	0.16753	false	-0.875977	2.04124e-09	1.48959e-08	false	1A
TraesCS1A02G036300	0.1	0.19	0.11	0.29	0.36	0.12	0.74	0.53	0.71	0.59	0.67	0.67	11	20	12	32	37	13	74	57	74	63	72	73	NA	NA	NA	NA	0.0994046	0.721723	0.758598	false	2.51944	7.00697e-10	1.77874e-09	up	-1.18004	0.00414128	0.00698847	down	2.4095	1.00919e-09	6.87977e-09	up	1.26911	0.00126872	0.00443025	up	1A
TraesCS1A02G037800	0.02	0.01	0	0.46	0.51	0.58	0.03	0.08	0.05	1.18	0.85	1.35	2	1	0	50	52	61	3	9	5	126	91	146	6.13423	7.67195e-11	3.28585e-10	up	4.50055	3.6569e-23	1.71988e-22	up	7.16676	6.83038e-16	2.49093e-15	up	3.4181	3.78097e-10	1.21505e-09	up	NA	NA	NA	NA	1.07553	0.000155421	0.000649408	up	1A
TraesCS1A02G039100	0.78	1.12	1.37	0.52	1.03	0.83	0.19	0.17	0.39	0.04	0.06	0.03	87	118	147	58	107	87	19	18	41	4	7	3	-0.120567	0.699355	0.751317	false	NA	NA	NA	NA	-4.40833	4.04756e-18	1.64716e-17	down	1.84539	4.13061e-06	9.68018e-06	up	-2.02526	5.51077e-09	3.51853e-08	down	-4.24825	1.08869e-15	1.48248e-14	down	1A
TraesCS1A02G039800	0.91	0.96	1.21	0.3	0.16	0.41	0.57	0.98	0.89	0.17	0.26	0.1	68	68	87	22	11	29	38	71	63	12	19	7	-1.47545	0.000677249	0.00147388	down	-2.08888	5.60126e-06	1.16042e-05	down	-2.30656	1.61866e-07	3.56874e-07	down	-1.30945	0.00412893	0.0069684	down	-0.226769	0.453259	0.570838	false	NA	NA	NA	NA	1A
TraesCS1A02G040300	0	0	0	0.42	0.12	0	0	0	0	1.66	1.32	1.2	0	0	0	18	5	0	0	0	0	70	56	51	NA	NA	NA	NA	8.40729	1.32017e-11	3.87703e-11	up	8.57368	6.53596e-12	1.89106e-11	up	NA	NA	NA	NA	NA	NA	NA	NA	2.87957	0.0156678	0.0411341	up	1A
TraesCS1A02G041400	0	0	0	0.05	0	0	0	0	0	2.62	3.48	3.92	0	0	0	1	0	0	0	0	0	53	71	80	NA	NA	NA	NA	8.61002	3.22495e-12	9.79359e-12	up	8.77598	1.53239e-12	4.6073e-12	up	NA	NA	NA	NA	NA	NA	NA	NA	7.48952	1.7505e-09	1.28299e-08	up	1A
TraesCS1A02G042100	0.77	0.39	1.18	0.28	0.5	0.16	0.33	0.4	0.23	0.46	0.37	0.19	46	22	68	17	28	9	18	23	13	27	22	11	-0.975191	0.0813293	0.118013	false	NA	NA	NA	NA	-0.931819	0.0704529	0.0911079	false	NA	NA	NA	NA	-1.17777	0.0134187	0.0311166	down	NA	NA	NA	NA	1A
TraesCS1A02G042700	43.8	28.2	31.47	20.63	15.35	12.85	51.79	49.64	56.13	18.93	16.3	22.81	2076	1266	1437	973	680	577	2211	2276	2521	870	755	1059	-0.730328	0.000127294	0.00030692	false	-1.30341	6.10725e-42	4.46204e-41	down	-0.581807	0.0197376	0.0276336	false	-1.50299	4.51427e-24	3.32828e-23	down	0.71181	0.000729781	0.00231421	false	0.19163	0.252685	0.391324	false	1A
TraesCS1A02G044600	3.68	3.55	5.95	2.59	2.76	2.99	8.56	9.29	5.56	2.37	1.66	1.95	104	95	162	73	73	80	218	254	149	65	46	54	-0.310533	0.297843	0.367103	false	-1.83156	2.67339e-13	8.56841e-13	down	-0.883767	0.00352051	0.00541201	false	-1.30886	2.40461e-07	6.23473e-07	down	0.936764	0.00010081	0.000376855	false	-0.531875	0.0779188	0.156671	false	1A
TraesCS1A02G045800	0.94	2.27	1.52	11.15	9.46	9.24	1.36	1.41	1.81	5.63	5.61	7.26	66	151	103	781	622	616	86	96	121	384	386	500	3.02076	4.37146e-40	6.65309e-39	up	2.14978	2.97348e-35	1.89748e-34	up	2.23117	1.64007e-22	8.1434e-22	up	2.88802	3.19702e-61	6.72826e-60	up	0.0691868	0.808095	0.866559	false	-0.746322	4.04842e-07	2.40388e-06	false	1A
TraesCS1A02G046400	16.69	20.69	18.81	5.3	3.69	5.58	14.17	13.65	14.49	2.86	3.08	2.46	1497	1758	1626	473	309	474	1145	1184	1232	249	270	216	-1.58902	1.18398e-21	9.4303e-21	down	-2.19479	8.3039e-96	1.22525e-94	down	-2.48495	2.94158e-92	5.70367e-91	down	-1.35051	1.89706e-18	1.05524e-17	down	-0.300974	0.00110478	0.00337378	false	-0.851387	4.90131e-06	2.56355e-05	false	1A
TraesCS1A02G046600	22.15	24.31	22.08	31.69	36.86	40.16	21.17	20.32	23.55	46.87	46.42	45.75	783	814	752	1115	1218	1345	674	695	789	1607	1604	1584	1.01496	1.0898e-15	6.45053e-15	up	1.23376	6.14057e-54	5.50878e-53	up	1.27673	7.03206e-46	6.58272e-45	up	0.921354	1.88976e-14	8.20082e-14	false	0.0323264	0.753631	0.825871	false	0.30374	0.00384408	0.011969	false	1A
TraesCS1A02G047000	7.73	7.4	7.04	20.4	21.97	18.62	4.7	5.08	5.52	15.65	15.24	16.21	1477	1339	1295	3877	3922	3368	808	939	999	2899	2845	3031	1.80822	2.26829e-65	6.21395e-64	up	1.75898	4.27548e-135	8.87538e-134	up	1.34185	4.56858e-63	5.81181e-62	up	2.17493	3.42039e-102	1.47232e-100	up	-0.427696	6.29998e-06	2.83952e-05	false	-0.424645	1.19045e-06	6.70147e-06	false	1A
TraesCS1A02G047300	2.69	2.13	1.6	7.91	6.81	8.16	5.91	6.17	7.24	8.56	7.35	10.15	204	153	117	597	483	587	404	453	521	630	545	754	2.1865	2.41662e-28	2.53766e-27	up	0.567929	9.29625e-06	1.89289e-05	false	2.27472	1.01417e-36	7.78744e-36	up	0.428221	0.00356827	0.00607332	false	1.6965	2.65966e-22	5.45452e-21	up	0.131652	0.367249	0.515207	false	1A
TraesCS1A02G047400	0	0	0	30.27	28.56	33.89	0	0	0	81.59	82.4	74.07	0	0	0	991	878	1056	0	0	0	2603	2649	2386	12.7407	7.47856e-27	7.38548e-26	up	13.838	9.67151e-32	5.70476e-31	up	14.0042	2.09626e-32	1.44393e-31	up	12.5234	4.72321e-26	3.79764e-25	up	NA	NA	NA	NA	1.30653	1.75231e-35	7.80002e-34	up	1A
TraesCS1A02G048600	2.51	1.85	1.41	0.78	1.13	1.25	0.88	0.89	0.78	0.31	0.16	0.38	142	99	77	44	60	67	45	49	42	17	9	21	-0.522555	0.113397	0.15835	false	-1.45229	0.00112091	0.00188775	down	-2.50712	3.47324e-10	8.99581e-10	down	0.481802	0.16908	0.21404	false	-1.06556	0.00028884	0.0009967	down	-1.94397	1.09718e-05	5.46579e-05	down	1A
TraesCS1A02G048700	0.57	0.45	0.25	9.22	6.52	8.75	0.61	0.52	0.53	5.54	5.52	6.46	24	18	10	384	255	347	23	21	21	225	226	265	4.61695	1.33803e-51	2.71917e-50	up	3.54164	7.30912e-43	5.42656e-42	up	4.03213	3.24735e-43	2.87874e-42	up	4.07422	8.75985e-50	1.42487e-48	up	NA	NA	NA	NA	-0.540157	0.00306341	0.00979241	false	1A
TraesCS1A02G049100	0	0	0	0.22	0.42	0.27	0	0	0	2.12	2.72	1.94	0	0	0	11	20	13	0	0	0	104	134	96	NA	NA	NA	NA	9.32264	1.6277e-14	5.52952e-14	up	9.4887	6.69553e-15	2.31252e-14	up	NA	NA	NA	NA	NA	NA	NA	NA	2.84736	1.66128e-14	2.02596e-13	up	1A
TraesCS1A02G049300	1.32	1.53	1.52	0.53	0.5	0.49	1.42	1.39	1.66	0.57	0.53	0.64	231	253	255	92	82	81	223	234	275	96	91	109	-1.16912	1.34932e-07	4.46641e-07	down	-1.22414	5.51691e-11	1.56449e-10	down	-1.07388	6.52567e-08	1.47501e-07	down	-1.37008	9.79392e-11	3.29103e-10	down	0.139807	0.373091	0.492052	false	0.137447	0.586338	0.713176	false	1A
TraesCS1A02G049600	2.14	1.55	2.02	26.59	22.7	22.09	2.74	2.54	2.14	17.93	18.19	18.28	194	133	177	2402	1926	1900	224	223	184	1579	1614	1625	3.99524	2.10762e-146	1.93207e-144	up	3.01298	2.6351e-198	8.54581e-197	up	3.50512	1.21435e-177	5.55065e-176	up	3.45128	1.1261e-141	8.2704e-140	up	0.482913	0.0106127	0.0253298	false	-0.447008	2.20147e-05	0.000105325	false	1A
TraesCS1A02G051300	0.48	0.51	0.6	1.14	1.52	1.06	0.55	0.73	0.46	1.3	1.16	1.63	71	71	85	166	208	148	73	104	64	185	167	234	1.56453	3.73009e-10	1.51576e-09	up	1.36431	2.24994e-09	5.81902e-09	up	1.61399	1.96591e-12	5.86987e-12	up	1.26468	6.23164e-07	1.56311e-06	up	0.238621	0.383111	0.502387	false	0.089504	0.667694	0.777681	false	1A
TraesCS1A02G051500	15.98	13.25	15.32	6.25	7.3	7.23	16.18	18.2	15.58	11.07	11.9	12.55	658	517	608	256	281	282	600	725	608	442	479	506	-0.754307	2.17187e-06	6.40772e-06	false	-0.355722	0.00121716	0.00204207	false	-0.0734787	0.567219	0.612261	false	-1.08729	3.32009e-14	1.41839e-13	down	0.271889	0.022527	0.0487612	false	0.722539	4.83655e-07	2.84963e-06	false	1A
TraesCS1A02G051600	0	0	0	0	0	0	0.61	0.64	0.41	0	0	0	0	0	0	0	0	0	53	59	37	0	0	0	NA	NA	NA	NA	-7.9972	2.22446e-10	6.09233e-10	down	NA	NA	NA	NA	-7.92858	5.35488e-10	1.70167e-09	down	8.23343	4.69386e-11	3.66184e-10	up	NA	NA	NA	NA	1A
TraesCS1A02G051900	10.44	8.6	9.05	13.41	15.98	18.36	9.36	9.22	8.94	16.75	16.04	16.09	255	199	213	326	365	425	206	218	207	397	383	385	1.11263	1.60791e-09	6.22907e-09	up	0.965994	7.92378e-13	2.48123e-12	false	1.05332	4.74083e-12	1.38225e-11	up	0.974356	1.10126e-08	3.1652e-08	false	0.0769983	0.63849	0.735231	false	-0.0172448	0.909196	0.94539	false	1A
TraesCS1A02G053600	1.37	1.89	1.68	1.75	1.52	0.74	1.15	1.22	0.85	0.34	0.86	0.73	78	102	92	99	81	40	59	67	46	19	48	41	0.0543773	0.874027	0.900507	false	-0.592399	0.119667	0.151405	false	-1.08903	0.0023862	0.00373599	down	0.499601	0.166678	0.211281	false	-0.507357	0.0674382	0.124078	false	-1.10043	0.0073727	0.02133	down	1A
TraesCS1A02G053700	2.55	2.52	1.72	1.61	2.16	0.8	0.79	1	1.47	0.65	0.62	0.54	97	91	63	61	77	29	27	37	53	24	23	20	-0.225585	0.545407	0.612712	false	NA	NA	NA	NA	-1.6558	6.43428e-06	1.27268e-05	down	0.663151	0.115766	0.151948	false	-0.948199	0.00353524	0.0095992	false	-1.39022	0.00143763	0.00495941	down	1A
TraesCS1A02G054400	0.4	0.41	0.34	0.09	0.04	0.03	0.17	0.15	0.31	0.06	0.05	0.07	64	63	53	15	6	4	25	24	47	10	8	11	-2.48173	4.91619e-06	1.39716e-05	down	NA	NA	NA	NA	-2.38595	3.11611e-07	6.74133e-07	down	NA	NA	NA	NA	-0.753121	0.0369978	0.0746445	false	NA	NA	NA	NA	1A
TraesCS1A02G055000	11.18	15.12	12.44	2.82	3.63	4.26	6.5	5.85	5.65	1.93	2.17	2.57	676	866	725	170	205	244	354	342	324	113	128	152	-1.50534	4.85701e-17	3.09552e-16	down	-1.29679	4.49758e-15	1.56872e-14	down	-2.283	1.26734e-45	1.18164e-44	down	-0.57012	0.00184838	0.00327055	false	-0.997261	2.14965e-14	2.3408e-13	false	-0.736028	0.000670151	0.00248103	false	1A
TraesCS1A02G055200	29.73	30.45	27.93	12.91	15.6	15.85	22.53	19.7	18.33	11.35	11.65	13.55	1499	1454	1357	648	735	757	1023	961	876	555	574	669	-0.642158	1.53538e-07	5.05846e-07	false	-0.591061	1.99125e-08	4.86017e-08	false	-1.01414	1.49423e-22	7.43199e-22	down	-0.269991	0.0324857	0.0475338	false	-0.433839	6.98437e-06	3.13074e-05	false	-0.330358	0.00966528	0.0270461	false	1A
TraesCS1A02G056100	0.68	1.35	1.08	0.05	0.1	0.15	0.86	0.4	0.48	0.55	0.12	0.17	28	53	43	2	4	6	32	16	19	22	5	7	-3.00375	1.20619e-05	3.2903e-05	down	NA	NA	NA	NA	-1.61949	0.00559193	0.00839417	down	NA	NA	NA	NA	-0.728576	0.100504	0.173071	false	NA	NA	NA	NA	1A
TraesCS1A02G056105	0.71	0.73	0.82	0.22	0.16	0.28	0.62	0.45	0.93	0.33	0.16	0.24	46	45	51	14	10	17	36	28	57	21	10	15	-1.42268	0.00387779	0.00744534	down	NA	NA	NA	NA	-1.3783	0.00298182	0.004621	down	NA	NA	NA	NA	-0.0763952	0.833034	0.884959	false	NA	NA	NA	NA	1A
TraesCS1A02G056200	19.77	17.12	17.23	1.47	2.48	3.18	14.66	11.58	14.99	0.4	2.45	2.05	256	210	215	19	30	39	171	145	184	5	31	26	-2.58183	3.86028e-18	2.60096e-17	down	-2.93506	3.68343e-06	7.73384e-06	down	-3.21226	2.59346e-07	5.63707e-07	down	-2.35546	1.88125e-14	8.16564e-14	down	-0.287486	0.10465	0.178902	false	NA	NA	NA	NA	1A
TraesCS1A02G056600	4.01	4.66	5.04	6.25	6.93	7.23	9.62	8.91	9.04	12.29	12.99	11.22	171	188	207	265	276	292	369	367	365	508	541	468	0.923778	8.94115e-07	2.74464e-06	false	0.543299	3.57947e-06	7.52244e-06	false	1.66874	9.32938e-29	5.77129e-28	up	-0.252354	0.0988931	0.131718	false	1.11478	8.75351e-14	8.95885e-13	up	0.786869	3.91301e-08	2.55514e-07	false	1A
TraesCS1A02G056900	1.13	1.07	1.21	0.26	0.24	0.24	2.67	1.28	2.26	0.85	0.46	1	30	27	31	7	6	6	64	33	57	22	12	26	NA	NA	NA	NA	-1.28594	0.00336062	0.00536289	down	NA	NA	NA	NA	-2.87565	2.80359e-07	7.22941e-07	down	0.96931	0.0106201	0.0253433	false	NA	NA	NA	NA	1A
TraesCS1A02G057100	1.7	2.09	2.15	0.81	0.71	0.57	1.25	1.41	1.28	1.17	0.81	0.89	129	150	157	61	50	41	85	103	92	86	60	66	-1.1562	6.09774e-05	0.00015286	down	-0.31788	0.223796	0.267983	false	-0.793583	0.00180901	0.00286874	false	-0.731097	0.015447	0.023871	false	-0.486462	0.0240372	0.0516109	false	0.404754	0.210278	0.340719	false	1A
TraesCS1A02G057200	2.82	2.48	2.82	23.63	21.41	24.94	8.27	8.44	8.67	10.53	11.51	10.95	284	237	274	2368	2015	2380	750	822	827	1029	1133	1080	3.4577	6.80168e-147	6.2938e-145	up	0.516355	4.35308e-10	1.17198e-09	false	2.27541	2.25755e-84	3.93497e-83	up	1.6475	1.36566e-51	2.31629e-50	up	1.74865	1.55253e-50	1.06827e-48	up	-1.13914	5.93737e-28	1.94317e-26	down	1A
TraesCS1A02G057300	0.57	0.74	0.61	0.18	0.11	0.18	0.82	1.17	0.78	0.21	0.2	0.35	53	65	55	17	10	16	69	105	69	19	18	32	-1.63978	0.000432994	0.000969478	down	-1.73272	1.81395e-06	3.89572e-06	down	-1.0811	0.00796473	0.0117398	down	-2.34354	1.99601e-08	5.62324e-08	down	0.641246	0.025283	0.0539318	false	NA	NA	NA	NA	1A
TraesCS1A02G058400	18.58	19.4	17.83	10.14	12.26	11.11	10.68	10.25	11.31	2.23	2.71	2.69	1850	1830	1711	1005	1141	1048	958	987	1067	215	264	262	-0.388511	0.000440257	0.000984733	false	-1.94196	2.28862e-69	2.51972e-68	down	-2.61598	6.38215e-123	1.75586e-121	down	0.234872	0.0289159	0.0426546	false	-0.684481	3.92962e-16	5.00118e-15	false	-2.18595	1.8017e-63	2.07869e-61	down	1A
TraesCS1A02G058900	4.77	6.31	5.87	2.5	2.44	2.98	15.95	16.25	16.23	2.17	2.66	2.38	297	372	352	155	142	176	895	979	958	131	162	145	-0.742982	0.000179082	0.000422975	false	-2.61109	3.97958e-105	6.44777e-104	down	-0.975694	5.70437e-08	1.29384e-07	false	-2.42988	7.86666e-65	1.78216e-63	down	1.62498	2.40441e-44	1.37229e-42	up	-0.189873	0.364459	0.512401	false	1A
TraesCS1A02G059100	0.18	0.14	0.21	12.75	10.58	11.58	2.66	2.9	1.92	15.19	12.64	14.82	12	9	14	870	678	752	164	192	125	1010	847	995	6.40601	2.6021e-106	1.40933e-104	up	2.6489	3.74632e-83	4.83094e-82	up	6.59597	1.30261e-127	3.7658e-126	up	2.40754	7.47405e-45	1.0793e-43	up	3.93642	1.93371e-30	6.30652e-29	up	0.232927	0.064335	0.134167	false	1A
TraesCS1A02G059200	1.58	1.09	1.51	0.92	0.92	0.66	1.99	2.04	2.12	0.77	0.53	0.65	139	91	128	81	76	55	158	174	177	66	46	56	-0.389899	0.186047	0.24473	false	-1.51662	5.93971e-11	1.68088e-10	down	-0.842039	0.00340429	0.00524275	false	-1.11441	5.1152e-06	1.18944e-05	down	0.664014	0.00121682	0.00368545	false	-0.410879	0.19244	0.318539	false	1A
TraesCS1A02G060500	1.09	1.55	1.45	0.35	0.16	0.26	3.84	3.8	4.07	0.63	1.13	0.73	93	126	120	30	13	21	296	315	330	52	95	61	-2.03834	1.02384e-07	3.42882e-07	down	-2.09599	3.41303e-24	1.65423e-23	down	-0.460324	0.116952	0.145661	false	-3.7265	8.52107e-42	1.13521e-40	down	1.62578	1.62663e-20	2.95159e-19	up	1.62343	0.000103299	0.000444198	up	1A
TraesCS1A02G062200	0	0	0	1.61	0.56	2.24	0	0	0	1.96	1.15	1.41	0	0	0	43	14	57	0	0	0	51	30	37	8.06774	1.44554e-09	5.62217e-09	up	NA	NA	NA	NA	NA	NA	NA	NA	7.84874	3.5802e-09	1.06682e-08	up	NA	NA	NA	NA	-0.0316798	0.946948	0.968235	false	1A
TraesCS1A02G064000	1.02	0.68	1.07	2.65	1.91	2.54	1.53	1.85	1.63	1.79	1.88	1.36	71	45	72	184	125	168	96	125	108	121	128	93	1.71329	1.55267e-09	6.0198e-09	up	0.140056	0.538493	0.587406	false	1.11219	8.52693e-05	0.000153632	up	0.689871	0.00378115	0.00641263	false	0.96173	0.000243125	0.000850713	false	-0.557238	0.0184087	0.0471972	false	1A
TraesCS1A02G065000	0.39	0.6	0.26	0.32	0.29	0.48	0.13	0.56	0.67	1.19	1.12	0.83	17	25	11	14	12	20	5	24	28	51	48	36	NA	NA	NA	NA	1.33985	0.00609762	0.00942398	up	1.59721	0.000494011	0.000830591	up	NA	NA	NA	NA	NA	NA	NA	NA	1.47431	0.00136843	0.00474476	up	1A
TraesCS1A02G065200	6.21	8.07	6.29	2.05	3.4	2.16	2.27	5.56	3.91	2.5	1.55	1.78	82	101	80	27	42	27	27	71	49	32	20	23	-1.09067	0.00245775	0.00488403	down	-0.878435	0.0406692	0.0558719	false	-1.56257	1.07115e-05	2.08198e-05	down	-0.457026	0.296503	0.353105	false	-0.693802	0.0319092	0.0658186	false	NA	NA	NA	NA	1A
TraesCS1A02G065600	0.74	1.03	0.79	0.24	0.38	0.24	0	0	0	0	0	0	101	133	104	32	49	31	0	0	0	0	0	0	-1.2308	0.000217129	0.000506698	down	NA	NA	NA	NA	-9.01258	1.71444e-13	5.45706e-13	down	NA	NA	NA	NA	-9.10457	6.59206e-14	6.82977e-13	down	NA	NA	NA	NA	1A
TraesCS1A02G066400	47.6	46.1	50.79	21.9	21.77	23.18	63.18	59.43	58.54	7.84	8.83	9.21	3551	3257	3650	1626	1518	1638	4245	4288	4138	567	644	673	-0.761271	1.00151e-12	4.91194e-12	false	-2.6695	0	0	down	-2.22601	2.19379e-129	6.44938e-128	down	-1.25584	2.68379e-43	3.7284e-42	down	0.433069	2.4809e-09	1.63232e-08	false	-1.42228	7.67144e-40	4.09454e-38	down	1A
TraesCS1A02G066700	1.1	1.49	1.08	9.28	13	11	0.51	0.49	0.36	2.51	1.99	2.28	157	202	148	1319	1734	1488	66	67	49	347	278	319	3.52821	1.63734e-111	9.60855e-110	up	2.45513	3.7009e-35	2.35688e-34	up	1.14382	3.42227e-10	8.86796e-10	up	4.78939	6.56984e-175	7.10021e-173	up	-1.32233	4.28575e-08	2.50551e-07	down	-2.34391	1.46152e-68	1.89268e-66	down	1A
TraesCS1A02G066800	15.42	13.26	15.11	56.61	58.01	54.6	16.08	14.58	14.94	66.5	72.17	69.54	817	665	771	2984	2872	2740	767	747	750	3416	3736	3607	2.29915	7.93898e-91	3.39381e-89	up	2.32902	8.39227e-261	3.95351e-259	up	2.5034	5.05006e-173	2.21838e-171	up	2.07372	2.12403e-103	9.32808e-102	up	0.164329	0.121321	0.201962	false	0.246438	0.00305701	0.0097743	false	1A
TraesCS1A02G066900	63.7	66.19	64.78	142.02	168.52	165.92	55.88	56.67	54.35	133.45	133.14	132.62	7186	7072	7040	15942	17767	17731	5677	6183	5810	14599	14677	14650	1.63933	3.22545e-69	9.54474e-68	up	1.39537	2.17878e-240	9.06155e-239	up	1.29162	1.75444e-105	3.99169e-104	up	1.69242	8.05292e-91	2.91658e-89	up	-0.114411	0.0637082	0.118368	false	-0.306137	0.000121649	0.000517572	false	1A
TraesCS1A02G067300	1.02	1.17	1.11	0.55	0.66	0.75	0.9	0.91	0.97	0.32	0.4	0.61	280	305	295	152	170	197	224	242	253	85	109	165	-0.394066	0.0431647	0.0669487	false	-0.921581	1.57071e-05	3.14385e-05	false	-1.04888	1.95227e-06	4.01208e-06	down	-0.317813	0.0947781	0.126682	false	-0.137543	0.348827	0.466963	false	-0.613025	0.014487	0.0384742	false	1A
TraesCS1A02G067900	1.44	1.33	1.26	2.86	2.16	2.11	3.49	3.53	3.96	3.35	2.26	3.44	97	85	82	192	136	135	212	230	253	219	149	227	1.17835	3.96701e-06	1.13914e-05	up	-0.141746	0.43586	0.487457	false	1.42066	6.84334e-10	1.73836e-09	up	-0.435088	0.0345747	0.050319	false	1.55173	2.47021e-16	3.19841e-15	up	0.285297	0.205404	0.334654	false	1A
TraesCS1A02G068100	8.97	7.15	8.26	1.93	1.43	1.8	11.07	10.44	11.39	0.46	0.19	0.51	819	619	727	175	122	156	911	922	986	41	17	46	-1.88682	8.99123e-25	8.17505e-24	down	-4.67959	5.58967e-42	4.08689e-41	down	-4.13101	2.51204e-76	3.90061e-75	down	-2.48642	2.41532e-59	4.87696e-58	down	0.537879	7.34585e-07	3.73927e-06	false	-2.2015	7.82947e-12	7.32298e-11	down	1A
TraesCS1A02G068400	1.65	1.74	1.56	1.74	1.39	1.04	2.97	2.42	2.32	2.72	4.28	3.54	79	79	72	83	62	47	128	112	105	126	200	166	0.104824	0.747045	0.792484	false	0.589879	0.0072438	0.0110894	false	1.34355	3.57852e-08	8.21454e-08	up	-0.700516	0.0158608	0.0244574	false	0.743219	0.0015886	0.00469023	false	1.28196	2.82163e-06	1.52373e-05	up	1A
TraesCS1A02G069300	0.49	0.41	0.53	2.4	1.77	2.96	2.29	1.85	1.23	2.27	2.51	2.11	46	36	48	223	155	262	193	167	109	206	229	193	2.67125	3.10092e-21	2.42311e-20	up	0.497431	0.0181007	0.0262288	false	2.51991	7.65801e-26	4.29843e-25	up	0.596567	0.019772	0.0300238	false	2.01206	3.30997e-13	3.21712e-12	up	-0.106877	0.612343	0.734221	false	1A
TraesCS1A02G069500	0.06	0	0	0.74	0.76	0.45	0.05	0.11	0.06	0.16	0.45	0.2	4	0	0	53	51	31	3	8	4	11	32	14	5.44541	9.57819e-10	3.77904e-09	up	NA	NA	NA	NA	NA	NA	NA	NA	3.32125	2.91412e-08	8.1038e-08	up	NA	NA	NA	NA	-1.31818	0.00668695	0.0195641	down	1A
TraesCS1A02G069900	17.05	16.89	21.97	9.7	9.22	13.29	31.87	31.17	29.18	5.57	5.28	5.68	776	728	963	439	392	573	1306	1372	1258	246	235	253	-0.44401	0.0117166	0.0205708	false	-2.34205	9.04105e-122	1.68872e-120	down	-1.50279	5.56961e-26	3.14331e-25	down	-1.33447	2.09439e-20	1.29856e-19	down	0.828687	7.92685e-14	8.13967e-13	false	-1.01593	2.55044e-09	1.84514e-08	down	1A
TraesCS1A02G070100	0.32	0.49	0.27	0.27	0.24	0.16	0	0	0	0	0	0	45	66	37	38	32	22	0	0	0	0	0	0	-0.321784	0.458548	0.529565	false	NA	NA	NA	NA	-7.82069	1.00354e-09	2.52395e-09	down	NA	NA	NA	NA	-7.91287	3.55086e-10	2.53111e-09	down	NA	NA	NA	NA	1A
TraesCS1A02G070300	1.91	1.04	1.92	0.64	0.63	0.93	3.27	3.08	2.78	1.43	1.31	1.24	117	60	113	39	36	54	180	182	161	85	78	74	-0.796809	0.0287461	0.0464285	false	-1.06145	4.65345e-07	1.04093e-06	down	-0.041569	0.888686	0.904947	false	-1.86817	5.4284e-12	2.0055e-11	down	1.00956	2.04459e-05	8.56577e-05	up	0.798002	0.0126598	0.0342751	false	1A
TraesCS1A02G070400	5.17	4.89	5.29	8.06	6.85	9.73	8.67	7.8	9.25	13.49	14.32	13.85	364	326	359	565	451	649	550	531	617	921	985	955	1.03701	1.51651e-09	5.88502e-09	up	0.833749	8.42152e-19	3.41975e-18	false	1.69487	4.74626e-52	4.98227e-51	up	0.124492	0.421648	0.481095	false	0.850783	3.86217e-12	3.37911e-11	false	0.701547	3.71016e-07	2.21246e-06	false	1A
TraesCS1A02G070600	0.39	0.48	0.66	2.6	2.36	2.83	1.21	1.45	1.08	4.98	4.76	5.03	52	60	85	345	294	358	145	187	137	644	620	656	2.70572	1.65912e-31	1.93726e-30	up	2.11581	2.34276e-55	2.15057e-54	up	3.53047	1.53748e-88	2.82804e-87	up	1.2408	4.30682e-11	1.49059e-10	up	1.40268	1.40177e-08	8.59684e-08	up	0.866987	1.39422e-10	1.14847e-09	false	1A
TraesCS1A02G070800	2.51	3.37	2.5	0.4	0.34	0.38	0.19	0.09	0.02	0	0	0	119	151	114	19	15	17	8	4	1	0	0	0	-2.54562	2.61494e-12	1.24728e-11	down	NA	NA	NA	NA	-9.19622	4.36069e-14	1.4348e-13	down	NA	NA	NA	NA	-4.72652	4.88799e-22	9.83275e-21	down	NA	NA	NA	NA	1A
TraesCS1A02G071400	6.9	5.89	5.97	0.55	0.41	0.5	7.83	7.95	7.78	0.45	0.31	0.51	1112	898	927	88	62	77	1136	1239	1188	70	49	80	-3.32403	1.7233e-74	5.61771e-73	down	-4.08067	4.80442e-181	1.39298e-179	down	-3.63484	1.13434e-100	2.44644e-99	down	-3.82119	3.211e-130	2.06377e-128	down	0.435346	5.83985e-06	2.64346e-05	false	-0.268225	0.381474	0.529274	false	1A
TraesCS1A02G071500	6.98	7.89	7.46	2.78	3.53	4.97	3.81	3.71	2.88	0.38	0.21	0.34	169	181	174	67	80	114	83	87	66	9	5	8	-0.635792	0.0160133	0.0273487	false	-3.34328	1.11777e-13	3.64265e-13	down	-4.32707	8.61168e-28	5.16209e-27	down	0.297235	0.32533	0.383398	false	-0.995055	3.45927e-06	1.61387e-05	false	-3.64969	3.53717e-15	4.59631e-14	down	1A
TraesCS1A02G071657	1.06	0.9	0.76	1.19	1.33	1.02	0.61	0.99	0.94	1.64	1.27	1.8	91	73	63	102	107	83	47	82	77	137	107	152	0.730572	0.0108874	0.0192291	false	1.02961	6.56187e-05	0.000124558	up	1.05193	4.27298e-05	7.90315e-05	up	0.657926	0.0247436	0.0369251	false	0.0119134	0.967137	0.978215	false	0.362596	0.135297	0.243525	false	1A
TraesCS1A02G072000	16.66	14.66	13.16	67.94	78.04	76.63	13.25	13	13.51	75.61	70.45	75.74	1513	1261	1152	6141	6625	6594	1084	1142	1163	6660	6253	6737	2.67104	2.79925e-123	1.94878e-121	up	2.61715	0	0	up	2.57249	5.11529e-182	2.42554e-180	up	2.66491	3.7611e-206	5.50452e-204	up	-0.0550234	0.580153	0.68593	false	-0.0567664	0.482308	0.624977	false	1A
TraesCS1A02G072100	0.1	0.21	0.18	14.52	14.23	13.48	0.32	0.21	0.18	9.79	9.73	9.87	10	20	18	1465	1348	1294	29	21	17	962	964	980	6.78481	1.88053e-166	2.15153e-164	up	5.51905	5.27243e-162	1.32678e-160	up	6.16646	3.46608e-147	1.20933e-145	up	6.08621	5.68795e-178	6.3157e-176	up	NA	NA	NA	NA	-0.576213	5.59719e-09	3.93471e-08	false	1A
TraesCS1A02G072200	6.3	5.96	6.43	92.79	87.88	92.02	6.36	6.81	7.36	61.97	63.73	62.46	455	408	448	6673	5936	6300	414	476	504	4343	4501	4420	4.21816	0	0	up	3.33264	0	0	up	3.5862	0	0	up	3.91404	0	0	up	0.242691	0.0460652	0.0900733	false	-0.589257	3.64609e-13	3.90672e-12	false	1A
TraesCS1A02G072600	11.05	11.2	9.85	33.05	34.09	31.39	11.39	10.67	9.86	20.82	21.85	25.25	666	639	572	1982	1920	1792	618	622	563	1217	1287	1490	1.96823	1.19204e-65	3.28695e-64	up	1.22713	1.44835e-37	9.69466e-37	up	1.33667	3.386e-35	2.50216e-34	up	1.80762	1.14242e-64	2.57944e-63	up	0.099016	0.373626	0.492604	false	-0.58939	7.54011e-09	5.24502e-08	false	1A
TraesCS1A02G073000	10.2	11.49	10.41	3.72	3.57	2.88	9.04	9.09	8.51	3.3	2.89	2.14	535	571	526	194	175	143	427	461	423	168	148	110	-1.30711	4.18535e-14	2.24034e-13	down	-1.53951	1.91337e-21	8.51275e-21	down	-1.68968	2.0535e-23	1.05685e-22	down	-1.20765	7.43015e-13	2.91396e-12	down	-0.161061	0.164001	0.257859	false	-0.340161	0.129507	0.235186	false	1A
TraesCS1A02G073100	0.23	0.44	0.52	0.52	0.39	0.32	0.77	0.85	0.88	0.51	0.72	0.76	20	36	43	44	31	26	59	70	71	42	60	64	0.38958	0.410523	0.482451	false	-0.186672	0.533724	0.582884	false	0.987255	0.0129893	0.0186405	false	-0.834946	0.0213214	0.0321955	false	1.16357	0.000795528	0.00250062	up	0.640391	0.0914833	0.178412	false	1A
TraesCS1A02G073300	4.27	3.84	3.71	10.86	11.23	10.13	3.66	3.21	3.31	8.49	8.16	8.57	400	341	335	1012	983	899	309	291	294	771	747	786	1.79484	1.38592e-40	2.13126e-39	up	1.44597	5.71685e-41	4.09799e-40	up	1.34678	1.10126e-29	7.00766e-29	up	1.84303	2.1473e-48	3.37439e-47	up	-0.109386	0.429293	0.547847	false	-0.406037	0.00013282	0.000561877	false	1A
TraesCS1A02G073500	3.47	2.64	3.13	1.14	1.44	1.05	2.38	2.75	2.35	0.87	0.83	1.2	459	331	399	150	178	132	284	352	295	112	108	155	-1.00376	3.67109e-07	1.16998e-06	down	-1.22979	8.02383e-12	2.38603e-11	down	-1.41672	1.71445e-13	5.45706e-13	down	-0.867179	3.70833e-06	8.72827e-06	false	-0.197131	0.183179	0.281674	false	-0.372332	0.105291	0.199389	false	1A
TraesCS1A02G073900	1.15	0.47	0.54	0.25	0.19	0.02	1.34	1.02	0.55	0.38	0.24	0.42	59	23	27	13	9	1	62	51	27	19	12	21	NA	NA	NA	NA	-1.3552	0.0033431	0.00533694	down	NA	NA	NA	NA	-2.47032	7.75164e-05	0.000161248	down	0.531048	0.216091	0.321213	false	NA	NA	NA	NA	1A
TraesCS1A02G074800	5.29	3.35	4.11	8.52	7.75	9.09	5.79	6.37	4.77	9	8.43	9.25	357	214	267	572	489	581	352	416	305	589	556	611	1.34196	7.07362e-13	3.50393e-12	up	0.79203	2.6051e-10	7.10417e-10	false	1.31734	2.47537e-16	9.21947e-16	up	0.765232	9.29768e-07	2.2997e-06	false	0.51523	0.00349499	0.00950217	false	0.0184086	0.885838	0.931517	false	1A
TraesCS1A02G075000	0.39	0.42	0.56	1.51	1.91	1.53	0.29	0.39	0.49	1.81	1.94	1.85	42	43	59	164	194	158	28	41	51	191	207	197	2.20499	2.22011e-16	1.36244e-15	up	2.39477	2.90941e-23	1.37146e-22	up	2.2927	1.33965e-21	6.38811e-21	up	2.25769	1.89638e-16	9.37571e-16	up	-0.114216	0.749685	0.823092	false	0.128347	0.494311	0.635499	false	1A
TraesCS1A02G075500	1.57	2.19	1.4	0.52	0.62	0.41	0.87	0.5	0.83	0.44	0.96	0.84	82	108	70	27	30	20	41	25	41	22	49	43	-1.39132	0.000252799	0.000584415	down	0.166927	0.689079	0.729013	false	-0.944467	0.00838833	0.0123334	false	-0.331065	0.468153	0.527133	false	-1.12268	0.000555194	0.00180678	down	0.489053	0.281762	0.424475	false	1A
TraesCS1A02G075800	1.47	2.09	1.99	0.07	0.25	0.27	2.88	3.37	2.99	0.61	1.03	0.63	131	177	171	6	21	23	232	291	253	53	90	55	-2.89458	8.87397e-14	4.65633e-13	down	-1.88735	8.84115e-18	3.46011e-17	down	-1.02993	0.00016446	0.000288899	down	-3.80266	1.13104e-32	1.16021e-31	down	0.847209	2.13996e-06	1.02918e-05	false	1.90439	4.37628e-05	0.000200264	up	1A
TraesCS1A02G076000	1.26	1.71	1.18	2.18	2.46	2.01	1.13	1.19	1.71	2.7	3.51	3.2	151	193	136	259	275	228	122	137	193	313	410	374	1.03197	6.02201e-07	1.87914e-06	up	1.36279	1.34179e-14	4.57726e-14	up	1.43859	2.26314e-15	8.02498e-15	up	0.905665	1.12661e-05	2.54166e-05	false	0.0650561	0.765656	0.834931	false	0.448536	0.00601654	0.0178015	false	1A
TraesCS1A02G076100	9.38	9.9	10.6	18.46	16.22	22.04	13.85	13.27	12.9	26.22	27.66	26.59	415	415	452	813	671	924	552	568	541	1125	1196	1152	1.27878	4.08885e-16	2.47401e-15	up	1.14501	3.63622e-40	2.57039e-39	up	1.68449	8.81179e-58	1.02541e-56	up	0.687914	1.27247e-06	3.10985e-06	false	0.528908	4.93424e-06	2.25655e-05	false	0.44906	0.00041112	0.0015861	false	1A
TraesCS1A02G076200	0	0	0	1.25	1.35	0.53	0.04	0	0	1.47	1.05	1.02	0	0	0	76	77	31	2	0	0	87	63	61	8.74139	6.24153e-12	2.89796e-11	up	6.80063	3.41033e-10	9.23797e-10	up	8.82739	1.06063e-12	3.22025e-12	up	6.66288	2.87555e-09	8.62906e-09	up	NA	NA	NA	NA	0.125658	0.725596	0.821165	false	1A
TraesCS1A02G076700	20.26	20.75	20.78	4.72	3.73	3.97	37.09	37.56	37.55	2.83	2.93	2.28	1690	1639	1670	392	291	314	2786	3030	2968	229	239	186	-1.95851	5.47567e-45	9.48537e-44	down	-3.66541	0	0	down	-2.68661	1.76392e-117	4.55447e-116	down	-2.98837	1.92811e-140	1.3958e-138	down	0.968087	2.87736e-42	1.51049e-40	false	-0.684589	0.000123918	0.000526637	false	1A
TraesCS1A02G077200	11.52	13.09	11.41	11.94	14.76	14.92	8.63	7.4	7.03	14.17	14.35	14.55	916	986	874	945	1097	1124	618	569	530	1093	1115	1133	0.556966	1.19087e-05	3.25137e-05	false	1.03954	2.57027e-28	1.3909e-27	up	0.514258	8.36713e-08	1.87779e-07	false	1.03119	9.9807e-16	4.72337e-15	up	-0.535962	1.25602e-06	6.22459e-06	false	-0.00110422	0.99193	0.995014	false	1A
TraesCS1A02G077500	13.42	13.66	13.68	28.83	23.41	28.98	13.83	16.3	13.86	25.71	25.64	24.03	950	916	933	2031	1549	1944	882	1116	930	1765	1774	1666	1.3499	1.17951e-24	1.06669e-23	up	0.913233	4.3549e-28	2.34601e-27	false	1.14249	2.3273e-39	1.8994e-38	up	1.06938	7.63879e-17	3.86856e-16	up	0.218534	0.0289076	0.0605109	false	-0.163773	0.146529	0.258712	false	1A
TraesCS1A02G077700	7.4	6.82	7.32	21.42	16.99	18.82	9.82	9.19	9.42	17.23	19.43	18.77	509	444	485	1466	1092	1226	608	611	614	1149	1306	1264	1.76429	7.48787e-35	9.79295e-34	up	1.10134	5.44167e-37	3.60281e-36	up	1.61823	2.27875e-53	2.44949e-52	up	1.19586	1.47994e-20	9.2448e-20	up	0.506581	4.67892e-06	2.14549e-05	false	-0.102402	0.390572	0.538521	false	1A
TraesCS1A02G078800	18.58	19.38	17.12	180.99	150.16	193.83	20.32	21.9	22.74	264.76	286.78	260.08	749	740	665	7262	5659	7404	738	854	869	10353	11300	10269	3.6083	7.33818e-174	9.06311e-172	up	3.77985	0	0	up	4.1371	0	0	up	3.19989	2.95908e-164	2.84376e-162	up	0.346458	0.000659457	0.00211408	false	0.572744	6.7448e-08	4.29283e-07	false	1A
TraesCS1A02G079400	0.08	0.05	0.05	0.61	0.63	0.51	0.62	0.33	0.8	0.85	0.6	0.91	5	3	3	36	35	29	33	19	45	49	35	53	NA	NA	NA	NA	0.577268	0.152213	0.188598	false	3.88743	3.69173e-10	9.5475e-10	up	NA	NA	NA	NA	NA	NA	NA	NA	0.377135	0.326889	0.473115	false	1A
TraesCS1A02G079700	6.33	6.37	6.46	13.33	16.11	16.99	4.7	5.05	4.49	19.54	19.73	19.25	953	908	937	1998	2267	2424	638	736	640	2854	2903	2839	1.62532	2.81089e-43	4.66528e-42	up	2.17553	2.20609e-206	7.53558e-205	up	1.86664	7.92177e-124	2.20434e-122	up	1.88357	3.74836e-61	7.87766e-60	up	-0.319585	0.00121277	0.00367431	false	0.283013	0.00395068	0.0122595	false	1A
TraesCS1A02G079800	6.95	6.64	7.76	1.45	2.2	1.27	6.07	6.89	5.09	1.55	0.72	0.68	515	466	554	107	152	89	405	494	357	111	52	49	-1.77838	3.62516e-18	2.44477e-17	down	-2.48212	5.1928e-10	1.39203e-09	down	-2.60652	1.78283e-28	1.09333e-27	down	-1.70417	4.46547e-16	2.15801e-15	down	-0.134891	0.326552	0.443955	false	-0.788492	0.0175562	0.0453189	false	1A
TraesCS1A02G079900	0	0	0	11.71	4.45	7.37	0.66	0	0.78	3.75	5.32	4.55	0	0	0	157	56	94	8	0	10	49	70	60	9.48985	2.8438e-14	1.53897e-13	up	3.38947	4.22612e-10	1.13837e-09	up	8.58797	5.88708e-12	1.70713e-11	up	4.23471	8.16171e-05	0.000169372	up	NA	NA	NA	NA	-0.854589	0.0139872	0.0373364	false	1A
TraesCS1A02G080200	1.85	1.61	1.32	0.53	0.75	0.6	1.55	1.19	1.26	0.85	0.32	0.7	197	162	135	56	75	61	149	123	127	88	33	73	-0.995388	0.000245372	0.000568227	false	-0.961939	0.0012155	0.0020394	false	-1.09763	0.000335873	0.000573082	down	-0.909368	0.000642201	0.00120305	false	-0.147428	0.475704	0.591984	false	-0.0624747	0.862435	0.915802	false	1A
TraesCS1A02G080300	0.27	0.58	0.63	0.1	0.51	0.19	0.69	0.74	1.19	0.63	0.41	0.68	18	37	41	7	32	12	42	48	76	41	27	45	NA	NA	NA	NA	-0.469775	0.200657	0.24283	false	NA	NA	NA	NA	-1.55325	0.00278149	0.00480651	down	0.936461	0.016874	0.0380098	false	NA	NA	NA	NA	1A
TraesCS1A02G080600	2.91	2.93	2.53	6.05	5.03	5.56	4.1	3.94	4.15	4.71	4.3	4.85	216	206	181	447	349	391	274	283	292	339	312	353	1.34589	5.06623e-14	2.69937e-13	up	0.323209	0.0152984	0.0223747	false	0.983462	5.6006e-10	1.43128e-09	false	0.634298	5.9508e-05	0.000125358	false	0.649669	2.16691e-05	9.03709e-05	false	-0.319177	0.0340948	0.0794497	false	1A
TraesCS1A02G081300	10.51	9.6	9.26	7.23	7.63	6.83	7.96	8.69	8.57	3.6	4.27	3.94	2181	1886	1851	1493	1480	1343	1487	1743	1685	725	865	800	-0.0879665	0.428664	0.500377	false	-0.95754	3.08542e-30	1.75102e-29	false	-1.06	1.6206e-26	9.32153e-26	down	-0.036346	0.712423	0.755512	false	-0.112766	0.185825	0.284881	false	-0.929898	3.5677e-18	6.14634e-17	false	1A
TraesCS1A02G082000	46.62	50.44	47.63	96.59	103.29	100.77	44.74	43.16	43.92	115.07	115.75	111.19	4303	4409	4235	8871	8910	8811	3719	3853	3841	10300	10440	10050	1.40524	2.17263e-55	4.83466e-54	up	1.51307	3.22346e-247	1.39613e-245	up	1.49703	3.57256e-120	9.50663e-119	up	1.37044	8.86148e-71	2.27866e-69	up	-0.026698	0.684102	0.771745	false	0.133846	0.0659922	0.136928	false	1A
TraesCS1A02G082200	5.6	5.08	4.37	32.56	24.33	27.69	4.58	6.31	6	22.83	25.92	24.15	186	160	140	1077	756	872	137	203	189	736	842	786	2.84636	9.85471e-60	2.40605e-58	up	2.24439	6.83895e-66	7.20882e-65	up	2.53046	5.75238e-74	8.6263e-73	up	2.50912	1.37752e-49	2.22933e-48	up	0.275231	0.160313	0.253122	false	-0.271586	0.0432411	0.0966914	false	1A
TraesCS1A02G082500	4.05	4.71	4.36	34.14	34.63	34.49	5.26	6.09	5.08	58.49	65.71	58.6	159	175	165	1333	1270	1282	186	231	189	2226	2520	2252	3.32756	1.42526e-130	1.0746e-128	up	3.61173	2.59253e-299	1.47116e-297	up	4.05667	1.27708e-289	1.32459e-287	up	2.83194	3.1191e-108	1.47313e-106	up	0.433565	0.0137194	0.031729	false	0.771467	3.87424e-16	5.50667e-15	false	1A
TraesCS1A02G082700	12.02	8.21	11.28	4.22	4.92	5.05	8.61	7.92	8.63	2.65	2.56	2.02	510	330	461	178	195	203	329	325	347	109	106	84	-0.806447	4.07627e-05	0.000104556	false	-1.66182	4.78368e-22	2.16825e-21	down	-1.87171	9.43224e-21	4.34726e-20	down	-0.646919	0.000114404	0.000233746	false	-0.220192	0.152185	0.242576	false	-1.02369	1.88619e-06	1.03827e-05	down	1A
TraesCS1A02G083000	2.86	2.97	2.84	9.87	7.95	7.72	4.94	5.19	5.08	10.68	11.13	9.32	298	293	285	1023	774	762	463	523	501	1079	1133	950	1.91353	1.76436e-34	2.28473e-33	up	1.17094	1.12987e-32	6.81485e-32	up	2.09957	5.61351e-70	7.90958e-69	up	0.933774	2.30441e-11	8.15729e-11	false	0.91798	1.07102e-13	1.0897e-12	false	0.2294	0.0804968	0.160971	false	1A
TraesCS1A02G083400	14.91	12.95	15.27	20.75	20.24	23.18	13.05	14.22	13.27	22.67	26.34	24.29	670	551	661	928	850	987	528	618	565	988	1157	1069	0.923866	2.13071e-11	9.51501e-11	false	0.991704	5.45687e-26	2.78351e-25	false	1.01955	1.05718e-19	4.63895e-19	up	0.845003	5.88173e-12	2.16758e-11	false	0.0174778	0.87914	0.917689	false	0.138495	0.222159	0.355324	false	1A
TraesCS1A02G084300	13.21	9.2	12.71	8.62	6.63	7.11	22.36	21.8	22.77	3.55	3.08	2.98	755	498	700	490	354	385	1151	1205	1233	197	172	167	-0.299186	0.10272	0.145145	false	-2.6615	3.25922e-132	6.61381e-131	down	-1.61599	1.35827e-21	6.47484e-21	down	-1.39554	3.02028e-25	2.34521e-24	down	1.03507	6.22473e-17	8.55228e-16	up	-1.27361	3.07417e-13	3.31632e-12	down	1A
TraesCS1A02G084500	2.6	1.89	1.79	5	2.86	3.85	2.34	2.42	2.12	4.42	4.58	4.67	384	264	255	735	394	539	311	345	296	632	660	675	1.25802	9.63321e-09	3.50599e-08	up	1.12818	6.76498e-24	3.25086e-23	up	1.37321	4.26175e-20	1.90411e-19	up	0.96043	7.41053e-07	1.84836e-06	false	0.234994	0.151602	0.241889	false	0.160834	0.356069	0.503724	false	1A
TraesCS1A02G084600	12.46	8.64	12.62	55.08	33.86	52.29	23.77	18.57	20.01	31.61	38.33	31.7	163	107	159	717	414	648	280	235	248	401	490	406	2.4236	1.59656e-27	1.62479e-26	up	0.844048	3.31221e-09	8.47703e-09	false	1.8443	1.43268e-24	7.70152e-24	up	1.37106	1.61752e-12	6.19439e-12	up	0.990459	2.30463e-07	1.24592e-06	false	-0.5341	0.00299087	0.00959223	false	1A
TraesCS1A02G084800	5.27	2.66	3.57	11.37	9.57	9.68	2.21	2.06	1.77	8.75	5.95	10.77	69	33	45	148	117	120	26	26	22	111	76	138	1.75999	1.81967e-08	6.4859e-08	up	2.21446	1.47562e-11	4.32185e-11	up	1.39534	2.24302e-05	4.24375e-05	up	2.52834	6.27825e-16	3.00704e-15	up	-0.828587	0.0388818	0.0779192	false	-0.322304	0.210681	0.341246	false	1A
TraesCS1A02G084900	2.19	1.69	2.44	16.67	16.07	17.54	2.73	3.2	3.41	22.67	22.77	22.97	82	60	88	621	562	622	92	116	121	823	833	842	3.34039	3.18939e-70	9.587e-69	up	3.00751	7.7166e-119	1.41085e-117	up	3.68851	4.5645e-124	1.27421e-122	up	2.60905	1.11632e-56	2.12346e-55	up	0.669797	0.00684472	0.0172295	false	0.39069	0.000576335	0.00216337	false	1A
TraesCS1A02G085400	3.47	3.4	3.67	11.87	8.29	8.51	1.75	2.43	1.78	2.71	3.69	5.26	99	92	101	337	221	230	45	67	48	75	103	147	1.79935	8.05521e-15	4.51784e-14	up	1.10481	0.000216957	0.000393018	up	0.399648	0.145059	0.177623	false	2.45243	1.91612e-22	1.31383e-21	up	-0.715306	0.0082385	0.020282	false	-1.35559	3.58919e-08	2.35229e-07	down	1A
TraesCS1A02G085500	25.82	30.9	33.2	8.8	9.44	8.44	21.62	20.81	18.44	4.34	5.64	5.7	749	849	928	254	256	232	565	584	507	122	160	162	-1.40285	8.31892e-20	6.07215e-19	down	-1.81934	2.09305e-35	1.3398e-34	down	-2.26335	2.34341e-49	2.33857e-48	down	-1.00968	7.38313e-12	2.70073e-11	down	-0.454744	0.000134388	0.000491704	false	-0.818615	1.46938e-05	7.20805e-05	false	1A
TraesCS1A02G085600	5.82	6.6	5.43	10.09	11.57	13.05	5.15	4.47	4.2	10.68	9.76	11.02	608	653	546	1048	1129	1291	484	451	415	1081	996	1126	1.30922	1.4392e-21	1.14123e-20	up	1.32577	3.35076e-39	2.31913e-38	up	1.07312	7.03268e-23	3.54276e-22	up	1.51059	6.56342e-30	6.1576e-29	up	-0.263315	0.033854	0.0692482	false	-0.194024	0.0928966	0.180625	false	1A
TraesCS1A02G085700	1.94	2.12	1.88	0.53	0.71	0.83	0.81	1.14	1.11	0.43	0.54	0.63	135	140	126	37	46	55	51	77	73	29	37	43	-1.17035	7.88872e-05	0.000195163	down	-0.797764	0.0166972	0.0242978	false	-1.63287	1.30975e-08	3.08507e-08	down	-0.385824	0.261902	0.316402	false	-0.84484	0.000411972	0.00137722	false	-0.421082	0.269604	0.410797	false	1A
TraesCS1A02G086100	5.08	3.49	4.97	2.73	3.07	2.86	3.81	2.98	4.1	0.9	0.92	0.67	395	257	372	211	223	211	267	224	302	68	70	51	-0.298965	0.133891	0.183196	false	-1.98841	9.45274e-21	4.10875e-20	down	-2.18837	4.78946e-22	2.33113e-21	down	-0.149098	0.413738	0.473301	false	-0.21014	0.232175	0.339788	false	-1.8479	2.26267e-16	3.28056e-15	down	1A
TraesCS1A02G086200	57.67	65.03	58.81	16.82	19.62	18.5	43.09	39.57	40.14	18.7	19.34	18.8	7003	7479	6881	2033	2227	2128	4713	4648	4619	2202	2295	2236	-1.37523	5.5723e-45	9.64711e-44	down	-0.973734	8.03343e-69	8.79592e-68	false	-1.41891	1.5684e-87	2.84791e-86	down	-0.980827	4.69051e-29	4.25396e-28	false	-0.455901	6.44629e-11	4.94964e-10	false	-0.00199782	0.981867	0.989054	false	1A
TraesCS1A02G087100	7.29	6.56	7.33	4.16	3.69	2.61	10.27	8.56	9.52	1.68	2.06	2.25	421	359	408	239	199	143	534	478	521	94	116	127	-0.666964	0.000898658	0.0019195	false	-2.10662	4.34736e-42	3.1856e-41	down	-1.57071	1.33463e-18	5.56291e-18	down	-1.25379	5.88156e-12	2.16758e-11	down	0.525495	2.56173e-05	0.000105544	false	-0.861378	0.000220421	0.000896088	false	1A
TraesCS1A02G087400	0.39	0.25	0.2	1.77	1.57	2.13	0.66	0.16	0.4	1.32	2.73	2.5	23	14	11	103	86	118	35	9	22	75	156	143	3.05032	2.59633e-15	1.50257e-14	up	2.57075	3.53007e-11	1.01232e-10	up	3.21033	5.68328e-17	2.18516e-16	up	2.35905	4.17503e-09	1.23781e-08	up	NA	NA	NA	NA	0.204324	0.472629	0.616158	false	1A
TraesCS1A02G087500	1.87	2.26	2.05	0.5	1.13	0.78	0.77	0.89	0.98	1.06	0.58	0.8	268	308	284	71	152	106	99	123	133	148	81	113	-1.02321	4.68605e-05	0.000119244	down	0.0312287	0.899323	0.914753	false	-1.08282	6.74537e-07	1.42847e-06	down	0.0416944	0.883344	0.90411	false	-1.12443	2.3698e-10	1.71919e-09	down	-0.0216108	0.943022	0.965894	false	1A
TraesCS1A02G087900	3.91	3.97	4.15	4.8	6.18	4.81	2.58	2.2	2.3	3.78	4	4.03	458	441	469	560	677	534	272	249	256	430	458	462	0.737292	4.03666e-07	1.28137e-06	false	0.876638	7.01867e-12	2.09328e-11	false	0.227799	0.0665345	0.0863434	false	1.33567	4.97428e-19	2.85264e-18	up	-0.659395	7.08257e-07	3.61118e-06	false	-0.468736	0.000484926	0.00184615	false	1A
TraesCS1A02G088300	0	0	0	2.95	2.23	2.41	0.03	0	0.01	4.29	4.74	5.35	0	0	0	212	151	165	2	0	1	301	335	379	10.2697	2.0364e-17	1.32183e-16	up	8.48259	1.96899e-23	9.32505e-23	up	11.0914	1.39027e-20	6.3557e-20	up	7.6087	3.07828e-18	1.69337e-17	up	NA	NA	NA	NA	0.865303	2.04837e-06	1.12332e-05	false	1A
TraesCS1A02G088600	0.35	0.91	0.65	0.04	0	0.1	0.05	0.09	0.06	0.01	0	0.03	25	62	45	3	0	7	3	6	4	1	0	2	-3.351	1.05647e-05	2.902e-05	down	NA	NA	NA	NA	-5.21788	1.51506e-07	3.34759e-07	down	NA	NA	NA	NA	-3.19804	1.94658e-07	1.06063e-06	down	NA	NA	NA	NA	1A
TraesCS1A02G088800	1.23	1.19	0.95	0.3	0.66	0.2	1.07	0.58	0.82	0.14	0.16	0.22	46	42	34	11	23	7	36	21	29	5	6	8	-1.21243	0.0277623	0.045012	down	NA	NA	NA	NA	-2.43485	2.02943e-05	3.85559e-05	down	NA	NA	NA	NA	-0.342063	0.385305	0.504445	false	NA	NA	NA	NA	1A
TraesCS1A02G089400	2.33	2.63	2.64	0.94	2.04	1.5	0.56	0.22	0.38	0.04	0.04	0.04	129	138	141	52	106	79	28	12	20	2	2	2	-0.419957	0.150272	0.202911	false	NA	NA	NA	NA	-5.84103	4.56223e-19	1.94596e-18	down	2.12289	4.72275e-07	1.19579e-06	up	-2.60555	2.88187e-16	3.71346e-15	down	-5.38223	1.8406e-14	2.23462e-13	down	1A
TraesCS1A02G089500	13.45	11.09	12.45	77.16	66.23	71.06	12.24	13.24	14.29	44.35	48.2	43.74	921	719	821	5257	4238	4609	755	877	927	2945	3225	2933	2.88776	2.15056e-118	1.40288e-116	up	1.91378	2.93598e-148	6.74507e-147	up	2.1355	1.82628e-111	4.43347e-110	up	2.61509	5.01943e-128	3.11723e-126	up	0.211358	0.05374	0.102599	false	-0.70894	3.12438e-13	3.36857e-12	false	1A
TraesCS1A02G089600	18.99	18.71	20.93	212.92	183.35	211.57	21.25	18.37	19.51	106.52	107.37	105.49	760	709	807	8479	6858	8021	766	711	740	4134	4199	4134	3.72752	2.62433e-217	5.04657e-215	up	2.57168	0	0	up	2.70062	4.3661e-242	3.2818e-240	up	3.54705	4.04221e-240	8.46591e-238	up	0.118738	0.257282	0.368559	false	-0.983727	4.77639e-26	1.40247e-24	false	1A
TraesCS1A02G089800	2.28	1.45	1.94	1.54	1.27	1.41	2.19	2.2	2.82	0.4	0.78	0.61	213	128	175	143	111	125	184	199	250	36	71	56	-0.0749687	0.764535	0.807533	false	-1.87482	2.11098e-14	7.13672e-14	down	-1.41393	9.82167e-07	2.05945e-06	down	-0.587193	0.00613944	0.0101063	false	0.451373	0.0244412	0.0523608	false	-1.29537	7.77081e-06	3.95043e-05	down	1A
TraesCS1A02G089900	18.37	19.92	20.89	31.15	35.31	32.31	12.86	14.01	13.02	31.81	29.83	31.62	2160	2218	2366	3644	3880	3598	1362	1593	1450	3626	3427	3640	1.08734	2.66089e-27	2.68164e-26	up	1.36185	1.04725e-104	1.68713e-103	up	0.911594	1.49457e-31	1.00547e-30	false	1.48717	1.04107e-60	2.16993e-59	up	-0.461091	3.79752e-08	2.2325e-07	false	-0.134319	0.099121	0.190064	false	1A
TraesCS1A02G091200	1.88	2.35	2.54	3.93	3.59	3.79	2.29	2.58	2.33	5.04	5.7	5.36	188	223	245	391	336	359	206	250	221	489	557	525	1.09295	1.89277e-09	7.28909e-09	up	1.29683	4.38387e-24	2.11858e-23	up	1.50528	7.34855e-24	3.84537e-23	up	0.833721	2.96506e-07	7.63379e-07	false	0.197421	0.245138	0.35467	false	0.454979	0.000833386	0.00303016	false	1A
TraesCS1A02G091300	10.52	10.82	11.17	16.71	21.17	20.53	6.69	7.05	6.91	18.5	17.63	19.53	988	962	1010	1561	1858	1826	566	640	615	1685	1618	1796	1.19214	5.04293e-24	4.44482e-23	up	1.56745	1.43732e-85	1.90451e-84	up	1.03155	2.95049e-31	1.96863e-30	up	1.67768	4.16486e-50	6.82756e-49	up	-0.54656	1.65382e-08	1.00755e-07	false	-0.119437	0.247992	0.385835	false	1A
TraesCS1A02G091600	0.15	0.28	0.5	0.18	0.12	0.19	0.8	0.78	0.73	0.17	0.03	0.05	9	16	29	11	7	11	44	46	42	10	2	3	NA	NA	NA	NA	-3.05476	2.23167e-07	5.10399e-07	down	NA	NA	NA	NA	-2.0351	6.99302e-05	0.000146249	down	1.43976	0.00135918	0.00407138	up	NA	NA	NA	NA	1A
TraesCS1A02G092700	12.19	11.07	14.18	8.3	7.11	8.83	71.98	67.6	67.9	17.51	19.47	17.9	828	712	928	561	451	568	4402	4440	4369	1153	1292	1190	-0.274934	0.0796346	0.115841	false	-1.78115	4.2022e-179	1.20144e-177	down	0.805441	6.76691e-13	2.08016e-12	false	-2.91285	4.66011e-154	3.93659e-152	down	2.57623	1.22665e-173	7.3724e-171	up	1.12364	9.26539e-20	1.80967e-18	up	1A
TraesCS1A02G093000	0.39	0.16	0.59	28.97	19.08	26.11	1.46	1.36	1.03	41	48.88	43.65	15	6	22	1119	692	960	51	51	38	1543	1854	1659	6.37876	1.57998e-40	2.42716e-39	up	5.25518	3.59949e-260	1.68901e-258	up	7.12446	3.78398e-184	1.83281e-182	up	4.45752	6.14851e-98	2.4863e-96	up	1.86069	5.87649e-05	0.000228713	up	0.789716	5.62861e-08	3.61099e-07	false	1A
TraesCS1A02G093800	166.62	162.71	174.22	85.57	76.78	84.66	224.66	207.93	198.39	102.75	102.97	101.47	10437	9653	10514	5334	4495	5024	12674	12598	11776	6242	6303	6224	-0.674894	1.25513e-10	5.29045e-10	false	-0.901049	8.3692e-70	9.2639e-69	false	-0.458026	2.41271e-12	7.16285e-12	false	-1.16907	7.02661e-35	7.68549e-34	down	0.4324	3.7773e-10	2.68472e-09	false	0.259826	0.00281189	0.00907643	false	1A
TraesCS1A02G094900	0	0	0	0.09	0.23	0.2	0	0	0.02	0.86	0.78	1.07	0	0	0	6	14	12	0	0	1	54	49	68	NA	NA	NA	NA	7.39412	2.74369e-09	7.05956e-09	up	8.5221	9.45515e-12	2.70889e-11	up	NA	NA	NA	NA	NA	NA	NA	NA	2.33807	6.8463e-07	3.96504e-06	up	1A
TraesCS1A02G095000	5.31	5.69	5.92	9.32	10.04	10.06	5.87	5.63	5.16	10.49	11.36	10.6	774	785	831	1352	1368	1389	770	793	712	1482	1618	1513	1.14843	2.14743e-23	1.84026e-22	up	1.10038	2.85759e-41	2.05979e-40	up	1.19536	1.64098e-37	1.28254e-36	up	1.00253	1.01743e-20	6.40367e-20	up	0.0843582	0.407853	0.527042	false	0.0889771	0.346378	0.493468	false	1A
TraesCS1A02G095500	6.31	7.72	6.99	7.27	8.31	8.61	3.1	2.62	2.81	3.63	3.35	3.18	389	451	415	446	479	503	172	156	164	217	202	192	0.553007	0.000257951	0.000595511	false	0.392615	0.0227492	0.0324695	false	-0.791727	3.07801e-07	6.66174e-07	false	1.6867	7.52592e-26	5.99713e-25	up	-1.19536	3.54876e-15	4.15468e-14	down	-1.3029	6.45764e-18	1.08278e-16	down	1A
TraesCS1A02G095600	1.25	0.59	0.62	4.82	3.28	4.07	1.2	1.9	1.25	5.16	4.31	5.81	81	36	39	311	199	250	70	119	77	325	273	369	2.65873	1.97877e-19	1.41839e-18	up	1.94688	4.42516e-22	2.0088e-21	up	2.88378	3.25707e-30	2.10603e-29	up	1.66988	1.16923e-11	4.22196e-11	up	0.927097	0.00545062	0.0141086	false	0.269705	0.153892	0.268787	false	1A
TraesCS1A02G095800	3.78	4.05	3.9	8.27	8.28	8.15	6.78	6.72	6.92	17.89	19.5	17.71	342	347	340	745	701	699	553	589	594	1571	1726	1571	1.42663	1.75606e-25	1.6453e-24	up	1.56921	8.77926e-83	1.12674e-81	up	2.48919	7.11049e-132	2.14314e-130	up	0.455791	0.000107793	0.000220892	false	0.909373	3.78677e-15	4.42103e-14	false	1.10494	1.92297e-27	6.1421e-26	up	1A
TraesCS1A02G096600	1.96	2.36	1.53	3.47	3.92	3.84	1.63	1.69	1.8	3.94	3.77	3.6	242	276	182	426	453	449	181	202	211	472	455	436	1.29175	7.76269e-13	3.83464e-12	up	1.2808	6.74494e-22	3.04311e-21	up	1.20946	9.11062e-14	2.94422e-13	up	1.31224	1.48495e-17	7.86121e-17	up	-0.0822761	0.649632	0.74438	false	-0.0402098	0.758649	0.84551	false	1A
TraesCS1A02G097000	138.53	119.3	129.27	95.21	70.22	81.95	177.36	187.34	165.35	33.04	37.73	33.22	4306	3512	3871	2945	2040	2413	4965	5632	4870	996	1146	1011	-0.290431	0.034229	0.0543444	false	-2.21269	2.24663e-215	8.17506e-214	down	-1.64207	3.84066e-70	5.42414e-69	down	-0.912662	9.17528e-14	3.81567e-13	false	0.560247	6.95622e-12	5.91655e-11	false	-1.30752	3.93528e-25	1.10385e-23	down	1A
TraesCS1A02G097200	6.71	9.63	7.66	18.44	20.97	20.53	7.17	5.96	6.57	24.06	25.52	24.29	390	530	429	1066	1139	1130	375	335	362	1356	1449	1382	1.67146	4.576e-31	5.26708e-30	up	2.04556	1.17936e-106	1.93659e-105	up	1.87976	9.13396e-56	1.02471e-54	up	1.78618	2.06903e-48	3.25393e-47	up	-0.176435	0.228174	0.335115	false	0.250209	0.0105656	0.0292544	false	1A
TraesCS1A02G097300	2.36	2.45	3.16	4.46	6.4	5.4	3.38	3.29	2.55	5.32	5.58	5.13	49	48	63	92	124	106	63	66	50	107	113	104	1.37344	4.1801e-06	1.19748e-05	up	0.936251	0.000234131	0.000422881	false	1.2642	4.18289e-06	8.38811e-06	up	0.995235	0.000439207	0.000839135	false	0.31725	0.299755	0.415445	false	-0.068835	0.774482	0.856553	false	1A
TraesCS1A02G099000	270.65	251.91	262.08	95.05	95.33	95.5	221.57	226.45	222.21	84.25	83.5	79.4	18940	16696	17669	6619	6235	6331	13964	15327	14735	5718	5710	5441	-1.10643	1.78999e-32	2.1619e-31	down	-1.30195	7.57538e-189	2.30626e-187	down	-1.41178	2.50548e-97	5.17448e-96	down	-1.04744	1.30816e-41	1.73328e-40	down	-0.120342	0.0534368	0.102108	false	-0.263038	0.000685022	0.00253083	false	1A
TraesCS1A02G099700	1.42	1.21	1.34	0.38	0.38	0.42	1.15	1.53	0.98	0.11	0.26	0.6	67	54	61	18	17	19	49	70	44	5	12	28	-1.38431	0.00122466	0.00256097	down	-1.77661	0.000328555	0.000585224	down	-1.77149	0.000383139	0.000650485	down	-1.44101	0.000870377	0.00160369	down	-0.00475678	0.98766	0.99192	false	NA	NA	NA	NA	1A
TraesCS1A02G100100	0.02	0.09	0	1.62	2.1	2.38	0.16	0.06	0.11	1.1	2.08	2.03	1	4	0	77	94	108	7	3	5	51	97	95	6.17061	6.10818e-17	3.87328e-16	up	4.09412	1.83424e-15	6.50846e-15	up	5.84764	7.79111e-15	2.6786e-14	up	4.36602	3.34011e-18	1.83425e-17	up	NA	NA	NA	NA	-0.280151	0.351814	0.499195	false	1A
TraesCS1A02G100300	6.23	6.68	5.68	1.01	1.77	1.49	4.09	3.55	3.57	0.79	0.59	1.16	634	644	557	102	168	144	375	350	344	78	59	116	-1.78165	1.37687e-20	1.04331e-19	down	-2.00063	5.66221e-23	2.64672e-22	down	-2.61179	3.22521e-41	2.73563e-40	down	-1.22065	1.12244e-09	3.46921e-09	down	-0.622315	3.74835e-07	1.97546e-06	false	-0.790707	0.00588415	0.0174505	false	1A
TraesCS1A02G100600	7.92	7.67	8.34	4.26	4.1	3.58	10.95	10.04	11.06	5.16	4.41	4.38	781	716	792	418	378	334	972	957	1033	493	425	423	-0.652397	6.31336e-06	1.77492e-05	false	-1.06196	4.27386e-26	2.18698e-25	down	-0.523557	1.47938e-05	2.84144e-05	false	-1.24133	1.82454e-22	1.25259e-21	down	0.527747	4.04466e-08	2.3714e-07	false	0.170847	0.239691	0.376107	false	1A
TraesCS1A02G101100	0.25	0.32	0.47	0.07	0.15	0.13	0.27	0.29	0.31	0.2	0.11	0.14	44	52	78	12	24	21	42	48	51	34	18	23	-1.24776	0.00756377	0.0137543	down	-0.826764	0.0375882	0.0519131	false	-0.968772	0.0216257	0.0301309	false	-1.15474	0.0101944	0.0162394	down	-0.152707	0.6452	0.740749	false	NA	NA	NA	NA	1A
TraesCS1A02G101200	2.86	4.01	3.36	4.49	3.86	3.22	2.48	2.5	2.6	6.24	4.74	5.43	137	182	155	214	173	146	107	116	118	290	222	255	0.533448	0.0209549	0.0348762	false	1.25175	4.63891e-12	1.39807e-11	up	0.94075	1.02983e-06	2.15701e-06	false	0.793763	0.000388143	0.000745962	false	-0.322159	0.118126	0.19752	false	0.449514	0.0218111	0.0545422	false	1A
TraesCS1A02G101500	1.5	1.09	1.03	0.41	0.14	0.48	0.69	0.43	0.63	0.29	0.25	0.2	130	89	86	35	11	39	54	36	52	24	21	17	-1.46561	0.000487394	0.00108327	down	-1.11764	0.0066011	0.0101561	down	-2.04726	1.1402e-08	2.69499e-08	down	-0.588387	0.216555	0.267021	false	-0.940533	0.00132031	0.00396424	false	NA	NA	NA	NA	1A
TraesCS1A02G101600	0.64	0.81	0.68	0.17	0.22	0.05	0.27	0.37	0.35	0.07	0.17	0.15	66	79	67	17	21	5	25	37	34	7	17	15	-1.94257	5.24505e-05	0.000132639	down	NA	NA	NA	NA	-2.19754	4.56821e-07	9.77612e-07	down	NA	NA	NA	NA	-0.991884	0.00233327	0.00661838	false	NA	NA	NA	NA	1A
TraesCS1A02G101900	1.2	1.35	1.25	1.05	1.12	2.09	2.2	3.25	2.42	2.48	1.55	2.3	31	33	31	27	27	51	51	81	59	62	39	58	NA	NA	NA	NA	-0.178892	0.577318	0.62475	false	0.990487	0.00874739	0.0128359	false	-0.703854	0.0736985	0.10068	false	1.1585	0.000565903	0.00183828	up	0.51658	0.197773	0.3252	false	1A
TraesCS1A02G102300	24.59	27.05	25.8	13.88	18.85	15.17	5.22	4.92	6.15	3.6	3.85	3.7	2125	2214	2148	1194	1523	1242	406	411	504	302	325	313	-0.347556	0.0033963	0.00658642	false	-0.408848	0.00162892	0.00269327	false	-2.54003	3.96413e-146	1.3721e-144	down	1.73348	2.33859e-39	2.91242e-38	up	-2.14164	4.03232e-104	9.42474e-102	down	-2.15183	1.57531e-63	1.82289e-61	down	1A
TraesCS1A02G102800	1.17	1.01	1.04	2.04	2.4	1.45	1.09	1.09	0.95	0.83	1.16	0.9	62	51	53	108	119	73	52	56	48	43	60	47	1.21804	7.87361e-05	0.000194822	up	0.0241725	0.940042	0.950094	false	0.101796	0.761289	0.792036	false	1.08997	0.000308248	0.000599508	up	0.0672227	0.824788	0.87899	false	-1.07513	0.000401939	0.00155436	down	1A
TraesCS1A02G102900	0	0.03	0.1	0.92	0.57	0.71	0	0.22	0.08	1.44	0.96	1.11	0	1	4	38	22	28	0	9	3	58	39	45	NA	NA	NA	NA	3.65774	5.7047e-09	1.43957e-08	up	5.07318	1.73547e-10	4.58525e-10	up	NA	NA	NA	NA	NA	NA	NA	NA	0.613953	0.128375	0.233561	false	1A
TraesCS1A02G103000	0.15	0	0.07	3.05	1.99	2.8	0.09	0.07	0.09	0.62	1.2	0.5	7	0	3	142	87	124	4	3	4	28	55	23	5.51437	5.88858e-22	4.7524e-21	up	NA	NA	NA	NA	NA	NA	NA	NA	5.15564	9.17036e-22	6.08788e-21	up	NA	NA	NA	NA	-1.81269	1.80604e-07	1.1068e-06	down	1A
TraesCS1A02G103900	3.68	3.27	2.96	21.48	17.34	17.45	3.71	4.34	4.58	17.01	18.43	16.58	488	411	379	2838	2152	2194	443	557	576	2190	2391	2155	2.85974	6.11241e-90	2.58305e-88	up	2.1794	5.65269e-140	1.21706e-138	up	2.64668	4.37323e-145	1.49584e-143	up	2.34142	3.80958e-72	1.00952e-70	up	0.456742	0.000529858	0.00173208	false	-0.169295	0.130589	0.236834	false	1A
TraesCS1A02G105300	7.97	7.99	7.19	4.02	4.11	4.9	7.98	6.89	7.51	2.01	2.14	1.68	728	692	633	366	351	424	657	609	650	178	191	150	-0.477955	0.00138631	0.00287328	false	-1.80407	2.56257e-41	1.85004e-40	down	-1.73562	5.97053e-33	4.17252e-32	down	-0.597484	2.24942e-05	4.92975e-05	false	0.0577036	0.590804	0.694759	false	-1.21494	1.95599e-12	1.95325e-11	down	1A
TraesCS1A02G105600	9.21	7.21	8.5	34.72	33.14	33.33	9.35	10.23	9.77	42.06	39.49	41.98	792	587	704	2971	2664	2715	724	851	796	3508	3319	3535	2.37166	1.98886e-79	7.05614e-78	up	2.21017	3.79863e-238	1.55919e-236	up	2.56318	2.76357e-150	9.95015e-149	up	1.96791	3.73491e-86	1.25677e-84	up	0.34252	0.00287095	0.00797109	false	0.233985	0.00609807	0.0180166	false	1A
TraesCS1A02G105800	0.05	0.1	0.18	0.89	0.83	1.2	0.28	0.22	0.24	0.99	0.93	1.39	4	7	13	66	58	85	19	16	17	72	68	102	3.48897	2.37195e-12	1.13449e-11	up	2.29703	3.37908e-10	9.15536e-10	up	3.5769	1.43885e-14	4.86927e-14	up	2.1582	7.22113e-08	1.9512e-07	up	NA	NA	NA	NA	0.130575	0.664466	0.775263	false	1A
TraesCS1A02G106300	0.68	0.87	0.55	0.16	0.65	0.51	0.29	0.33	0.46	0.67	0.74	0.71	136	165	106	33	122	97	52	65	87	130	145	140	-0.326107	0.375409	0.447541	false	1.10916	4.4692e-06	9.32229e-06	up	0.275296	0.225264	0.26615	false	0.459354	0.243697	0.296634	false	-0.844549	0.00121884	0.00369079	false	0.639177	0.0587559	0.124691	false	1A
TraesCS1A02G106600	63.27	62.05	65.52	127.52	111.19	125.63	62.92	60.57	53.9	153.69	160.03	147.57	3010	2796	3003	6037	4944	5662	2696	2787	2430	7091	7440	6875	1.28621	2.73874e-31	3.17713e-30	up	1.51614	1.90313e-132	3.87117e-131	up	1.52841	3.55218e-104	7.95407e-103	up	1.22257	1.99719e-31	1.97145e-30	up	0.00167541	0.983313	0.989056	false	0.28542	0.00203641	0.00678962	false	1A
TraesCS1A02G106700	5.37	3.22	3.44	2.77	1.17	1.21	9.29	10	9.81	2.75	2.65	2.7	201	114	124	103	41	43	313	362	348	100	97	99	-0.85973	0.017688	0.0299257	false	-1.70654	5.25252e-25	2.60118e-24	down	-0.317101	0.214509	0.25448	false	-2.3013	4.80013e-17	2.46384e-16	down	1.37896	2.71599e-13	2.66442e-12	up	0.588734	0.0835449	0.165761	false	1A
TraesCS1A02G107500	0.35	0.18	0.38	1.48	1.45	1.01	0.37	1	0.49	0.86	0.74	1.2	21	10	22	88	81	57	20	58	28	50	43	70	2.45726	4.27005e-09	1.59761e-08	up	0.710756	0.079674	0.10413	false	1.86827	2.34957e-05	4.43665e-05	up	1.24888	0.00169981	0.00302104	up	NA	NA	NA	NA	-0.547871	0.0893389	0.175025	false	1A
TraesCS1A02G107600	8.32	9.4	9.41	12.14	16.03	11.27	6.68	5.37	5.5	11.91	10.24	12.37	580	620	632	842	1044	744	419	362	363	805	697	844	0.884814	1.0796e-09	4.24281e-09	false	1.11474	1.82073e-21	8.10723e-21	up	0.603255	2.2443e-07	4.90248e-07	false	1.34597	1.12004e-19	6.67204e-19	up	-0.52232	3.10993e-05	0.000126432	false	-0.24146	0.0743678	0.150768	false	1A
TraesCS1A02G108100	0.75	1.1	1.31	3	3.05	3.1	1.16	1.01	1.17	3.5	2.21	2.55	82	114	138	327	312	321	114	107	121	371	236	273	1.8873	4.65222e-18	3.12313e-17	up	1.44517	1.56483e-13	5.06687e-13	up	1.64316	8.26756e-13	2.52679e-12	up	1.63898	2.45882e-19	1.43598e-18	up	0.186741	0.437072	0.555394	false	-0.202548	0.260566	0.400736	false	1A
TraesCS1A02G108400	2.38	1.81	2.28	0.7	1.05	0.92	1.34	2.35	1.66	0.25	0.18	0.05	136	98	126	40	56	50	69	130	90	14	10	3	-0.934694	0.00222644	0.00445892	false	-3.3302	6.43721e-14	2.1239e-13	down	-3.48659	3.61584e-16	1.33617e-15	down	-0.828888	0.0111058	0.0175948	false	-0.16594	0.513062	0.626178	false	-2.511	1.74622e-06	9.65223e-06	down	1A
TraesCS1A02G108800	0.5	0.25	0.58	0.17	0.14	0.1	0.49	0.6	0.69	0.08	0.23	0.07	55	26	61	19	14	10	48	64	72	8	25	7	-1.35789	0.0103558	0.0183621	down	-2.11592	6.34027e-06	1.30797e-05	down	-1.57976	0.00473488	0.00717254	down	-1.94467	1.17907e-05	2.6548e-05	down	0.527182	0.130824	0.214789	false	NA	NA	NA	NA	1A
TraesCS1A02G109200	3.15	4.19	4.06	7.31	7.67	7.63	3.86	4.04	4.02	6.87	7.19	5.95	255	322	317	590	581	586	282	317	309	540	570	472	1.34016	1.28074e-17	8.40577e-17	up	0.883504	8.96762e-13	2.80118e-12	false	1.06932	5.08554e-13	1.57572e-12	up	1.10361	1.98564e-16	9.80744e-16	up	0.174867	0.243744	0.35307	false	-0.228679	0.0728882	0.148332	false	1A
TraesCS1A02G109600	3.4	3.62	4.68	3.07	2.02	2.79	3.6	4.4	4.64	1.73	1.53	0.82	148	149	196	133	82	115	141	185	191	73	65	35	-0.211575	0.421212	0.492947	false	-1.49298	1.28243e-08	3.16338e-08	down	-1.26338	1.14148e-05	2.21437e-05	down	-0.492388	0.0431326	0.0616643	false	0.219364	0.266227	0.378671	false	-1.00768	0.00155866	0.00533726	down	1A
TraesCS1A02G110000	0.02	0.16	0.05	1.08	1.21	0.98	0.06	0.15	0.13	0.73	0.45	0.69	2	16	5	111	117	96	6	15	13	73	46	70	4.17835	1.03606e-18	7.16299e-18	up	2.5625	6.61032e-09	1.6615e-08	up	3.28171	1.27373e-09	3.18349e-09	up	3.40635	4.41925e-18	2.41053e-17	up	NA	NA	NA	NA	-0.85445	0.00217056	0.00718945	false	1A
TraesCS1A02G110300	51.9	47.04	50.21	139.85	143.5	154.49	48.29	45.06	45.24	131.44	130.06	134.71	2944	2527	2744	7894	7608	8302	2467	2472	2432	7231	7210	7483	1.90354	6.9426e-78	2.40107e-76	up	1.65315	3.42347e-239	1.41396e-237	up	1.66406	6.51282e-118	1.69022e-116	up	1.84156	9.92651e-100	4.12385e-98	up	0.000568408	0.994089	0.996226	false	-0.197123	0.0124334	0.0337325	false	1A
TraesCS1A02G110900	47.04	47.91	45.77	11.27	12.56	11.01	37.08	35.67	38.58	3.92	4.46	4.27	4715	4549	4420	1124	1177	1046	3348	3458	3665	381	437	419	-1.66517	9.49495e-63	2.47044e-61	down	-3.00013	0	0	down	-3.22028	1.80175e-305	2.03899e-303	down	-1.49571	5.22906e-60	1.06827e-58	down	-0.230609	0.000534588	0.0017458	false	-1.51335	3.66221e-39	1.89963e-37	down	1A
TraesCS1A02G111100	5.14	4.54	5.01	2.11	2.43	1.77	3.43	3.84	3.86	2.03	0.72	1.37	451	377	423	184	199	147	271	326	321	173	62	118	-0.873598	1.78602e-06	5.31931e-06	false	-1.29369	0.00154316	0.00255927	down	-1.57537	2.14746e-10	5.63707e-10	down	-0.642143	0.000410671	0.00078719	false	-0.292021	0.0296962	0.0619061	false	-0.661506	0.0221957	0.0553438	false	1A
TraesCS1A02G111500	0	0	0	1.41	1.59	1.54	0	0.03	0.21	5.45	6.49	5.05	0	0	0	49	52	51	0	1	7	185	222	173	8.47253	2.05059e-11	9.17042e-11	up	6.26353	5.03508e-29	2.7756e-28	up	10.2849	1.1463e-17	4.56482e-17	up	4.40539	3.38999e-10	1.09346e-09	up	NA	NA	NA	NA	1.85452	2.14911e-14	2.58827e-13	up	1A
TraesCS1A02G112100	3.75	3.09	3.59	5.48	5.82	4.24	2.66	2.39	3.08	4.96	4.68	4.65	331	259	306	482	481	355	212	204	258	425	404	402	0.922154	1.43766e-07	4.75056e-07	false	0.950784	8.92012e-12	2.64425e-11	false	0.706667	1.01702e-06	2.13062e-06	false	1.11597	1.02903e-10	3.45291e-10	up	-0.25433	0.113626	0.191343	false	-0.174146	0.243132	0.380116	false	1A
TraesCS1A02G112200	12.35	14.88	14.76	2.19	2.12	2.5	11.2	11.88	8.91	3.02	3.98	2.69	1124	1283	1295	198	180	216	918	1046	769	267	354	240	-2.27281	1.03686e-51	2.1144e-50	down	-1.58531	8.7947e-29	4.8258e-28	down	-1.8582	6.08941e-40	5.0346e-39	down	-2.05119	3.97705e-39	4.91363e-38	down	-0.283777	0.0148492	0.0339882	false	0.457496	0.017149	0.0444307	false	1A
TraesCS1A02G112600	3.67	3.72	3.59	6.56	6.6	6.81	3.99	3.24	4.21	6.38	5.51	5.95	276	265	260	491	464	485	270	236	300	465	405	438	1.2139	1.79776e-15	1.05155e-14	up	0.779085	1.28749e-08	3.17532e-08	false	0.955269	9.95952e-12	2.85031e-11	false	0.986961	1.05135e-10	3.52483e-10	false	0.165665	0.278628	0.392622	false	-0.216435	0.100366	0.191946	false	1A
TraesCS1A02G113600	0.41	0.7	0.74	0.08	0	0.21	0.93	0.87	0.85	0	0.03	0.02	25	40	43	5	0	12	51	51	49	0	2	1	NA	NA	NA	NA	-5.57342	2.38171e-09	6.15154e-09	down	NA	NA	NA	NA	-2.99248	2.17844e-06	5.22787e-06	down	0.635978	0.0714563	0.130154	false	NA	NA	NA	NA	1A
TraesCS1A02G113700	0.65	0.79	0.45	0.25	0.34	0.13	0.68	0.52	0.54	0.27	0.38	0.47	60	69	40	23	29	11	56	46	47	24	34	42	-1.06136	0.0240151	0.0394775	down	-0.498601	0.175355	0.214659	false	-0.510328	0.191993	0.229702	false	-1.10034	0.0149402	0.0231474	down	-0.0226477	0.944659	0.963157	false	NA	NA	NA	NA	1A
TraesCS1A02G115000	29.49	25.47	31.43	11.32	8.3	10.44	29.57	30.25	31.06	5.03	5.76	5.54	2060	1685	2115	787	542	691	1860	2044	2056	341	393	379	-1.1674	1.75138e-14	9.61121e-14	down	-2.33891	3.26583e-169	8.67978e-168	down	-2.14917	4.29965e-79	6.94007e-78	down	-1.40857	3.41601e-27	2.87924e-26	down	0.179502	0.0497725	0.0961495	false	-0.937853	6.68109e-10	5.12906e-09	false	1A
TraesCS1A02G115200	32.98	39.04	33.15	4.67	3.96	2.88	22.58	23.39	25.16	1.64	1.51	1.48	2564	2875	2483	361	288	212	1581	1759	1854	124	115	113	-2.83737	5.81346e-72	1.80444e-70	down	-3.80046	5.31843e-252	2.3671e-250	down	-4.24523	1.41398e-264	1.25129e-262	down	-2.44337	1.25447e-59	2.54401e-58	down	-0.455534	1.28938e-07	7.16323e-07	false	-1.36495	1.39322e-10	1.14782e-09	down	1A
TraesCS1A02G115300	0.91	0.66	0.95	0.03	0.08	0.13	1.72	1.37	1.32	0.02	0.03	0.07	113	78	114	4	9	15	193	165	156	2	4	8	-3.07445	5.02497e-11	2.18481e-10	down	-5.12125	2.80754e-29	1.55644e-28	down	-4.19846	5.24671e-16	1.92388e-15	down	-4.04946	3.80608e-25	2.94484e-24	down	0.912595	2.65157e-05	0.000109055	false	NA	NA	NA	NA	1A
TraesCS1A02G115400	0.91	0.53	0.45	19.38	15.69	17.8	3.94	4.28	3.59	14.18	16.08	15.14	38	21	18	805	612	704	148	173	142	574	656	619	5.15448	3.76322e-100	1.86694e-98	up	2.07924	7.63989e-55	6.95426e-54	up	4.8346	1.09191e-105	2.49174e-104	up	2.34701	1.01566e-47	1.56927e-46	up	2.74655	2.30597e-21	4.45316e-20	up	-0.275619	0.035986	0.0830032	false	1A
TraesCS1A02G115500	3.08	3.75	3.17	7.08	7.55	7.12	3.83	3.03	4.06	8.11	7.68	7.81	281	324	278	642	643	615	314	267	351	717	684	697	1.47179	1.07669e-23	9.36275e-23	up	1.25098	2.21773e-25	1.11101e-24	up	1.49545	2.26344e-32	1.55732e-31	up	1.17658	3.77209e-16	1.83065e-15	up	0.233835	0.130092	0.213788	false	0.0655955	0.560051	0.691363	false	1A
TraesCS1A02G115700	0.1	0.34	0.19	57.68	54.47	63.32	1.45	1.98	1.4	107.38	115.93	110.94	5	16	9	2820	2501	2947	64	94	65	5116	5566	5337	8.47455	1.21948e-184	1.68602e-182	up	6.24854	0	0	up	9.3075	1.19602e-251	9.58138e-250	up	5.36551	2.89946e-275	8.00474e-273	up	3.04261	1.99788e-12	1.80069e-11	up	0.875628	2.3809e-21	5.19379e-20	false	1A
TraesCS1A02G116200	0.45	0.39	0.46	0.66	0.73	0.74	0.63	0.4	0.45	0.77	0.49	0.89	80	66	80	117	122	125	101	70	77	134	86	156	1.05518	5.73473e-05	0.000144263	up	0.675901	0.0117377	0.017466	false	0.981803	0.000362846	0.000617202	false	0.699023	0.00745581	0.0121191	false	0.295002	0.271642	0.384775	false	-0.0321249	0.898329	0.938736	false	1A
TraesCS1A02G116600	3.62	3.93	2.47	3.45	4.9	3.92	4.55	3.84	3.62	8.85	12.19	7.11	38	39	25	36	48	39	43	39	36	90	125	73	NA	NA	NA	NA	1.36702	8.41902e-06	1.71985e-05	up	1.74634	2.04011e-07	4.46702e-07	up	0.206683	0.590611	0.64424	false	NA	NA	NA	NA	1.1507	0.00037057	0.00144272	up	1A
TraesCS1A02G116900	1.55	1.22	1.1	9.89	7.8	8.84	2.15	3.12	2.42	5.42	5.06	4.45	60	45	41	382	283	325	75	117	89	204	192	169	3.13149	3.80036e-40	5.78988e-39	up	1.09313	2.2641e-07	5.17597e-07	up	2.20205	2.9318e-19	1.26157e-18	up	1.97118	1.0972e-20	6.89503e-20	up	1.09829	0.000129083	0.000473647	up	-0.886019	6.03679e-07	3.51654e-06	false	1A
TraesCS1A02G117700	1.69	1.34	1.04	0.8	0.75	0.69	2.47	2.12	2.3	0.36	0.33	0.69	140	105	83	66	58	54	184	170	180	29	27	56	-0.511828	0.0964331	0.13731	false	-2.17498	1.66419e-15	5.91596e-15	down	-1.30129	0.000181271	0.000317288	down	-1.43672	3.43671e-09	1.02553e-08	down	0.863125	5.24194e-05	0.000206026	false	-0.747219	0.0473164	0.104205	false	1A
TraesCS1A02G118300	1.92	1.09	1.37	0.81	0.82	1.06	1.71	2.14	1.94	0.74	0.86	0.53	141	76	97	59	56	74	113	152	135	53	62	38	-0.359289	0.26359	0.330859	false	-1.30154	7.60539e-07	1.67808e-06	down	-0.785433	0.0144649	0.0206224	false	-0.926552	0.000538151	0.00101745	false	0.5059	0.036466	0.0737458	false	-0.383308	0.251304	0.389709	false	1A
TraesCS1A02G118400	10.44	9.16	10.39	6.91	6	6.27	16.49	13.72	13.17	5.7	5.65	4.87	633	526	607	417	340	360	901	805	757	335	335	289	-0.292852	0.0594036	0.0891831	false	-1.28205	1.13135e-26	5.87237e-26	down	-0.632573	3.46809e-06	6.99408e-06	false	-0.993454	2.95151e-12	1.11159e-11	false	0.63882	4.57722e-08	2.6648e-07	false	-0.296831	0.0525932	0.11379	false	1A
TraesCS1A02G118800	6.82	7.36	5.9	8.42	10.67	9.58	4.79	4.7	5.63	11.64	11.25	10.89	643	657	536	790	940	856	407	429	503	1064	1037	1005	0.861212	2.93477e-10	1.20209e-09	false	1.29638	9.02928e-40	6.33016e-39	up	1.00654	3.49943e-20	1.56869e-19	up	1.10066	2.82248e-17	1.46973e-16	up	-0.300478	0.0164781	0.0372334	false	0.186648	0.0912829	0.1781	false	1A
TraesCS1A02G119000	0	0	0.19	12.81	12.68	11.94	0.2	1.02	0.57	3.98	3.77	3.58	0	0	2	142	132	126	2	11	6	43	41	39	8.00985	4.3616e-14	2.33277e-13	up	NA	NA	NA	NA	NA	NA	NA	NA	4.55076	5.45877e-25	4.19523e-24	up	NA	NA	NA	NA	-1.77831	3.51308e-11	3.07106e-10	down	1A
TraesCS1A02G119100	2.12	1.77	1.68	14.61	11.46	10.14	0.36	0.39	0.58	1.38	1.55	1.54	119	94	91	817	602	540	18	21	31	75	85	85	3.05564	4.2217e-54	9.09274e-53	up	1.89106	2.42856e-08	5.89856e-08	up	-0.0626085	0.808335	0.834443	false	4.95734	1.50969e-88	5.24564e-87	up	-1.96343	1.49319e-09	1.0025e-08	down	-3.07501	9.97583e-61	1.05504e-58	down	1A
TraesCS1A02G119300	4.87	3.57	4.56	21.26	17.43	22.91	4.71	5.57	4.42	18.86	19.94	20.79	407	282	367	1766	1360	1812	354	450	350	1527	1627	1700	2.59635	8.95865e-59	2.13863e-57	up	2.1548	2.09714e-110	3.57762e-109	up	2.4488	7.40733e-93	1.45012e-91	up	2.25097	7.39366e-56	1.38601e-54	up	0.283647	0.0657055	0.121371	false	-0.103777	0.380976	0.528758	false	1A
TraesCS1A02G119500	9.65	8.41	8.73	50	46.5	60.19	8.63	7.26	7.65	38.37	39.45	37.72	655	541	571	3379	2951	3872	528	477	492	2527	2618	2508	2.90036	1.33597e-104	7.06089e-103	up	2.43389	2.81163e-214	1.01566e-212	up	2.36301	1.68552e-147	5.90114e-146	up	2.91932	3.03304e-122	1.75278e-120	up	-0.080716	0.497272	0.612018	false	-0.493986	4.27172e-06	2.24991e-05	false	1A
TraesCS1A02G119600	0.51	0.88	0.85	1.7	2.24	1.64	1.08	1.62	1.69	1.6	1.64	1.29	32	52	51	106	131	97	61	98	100	97	100	79	1.6684	1.19558e-07	3.97668e-07	up	0.179069	0.493394	0.543769	false	1.2766	4.46434e-05	8.24608e-05	up	0.520938	0.0565444	0.0790485	false	1.08632	0.000485184	0.00159677	up	-0.351295	0.162459	0.279931	false	1A
TraesCS1A02G119800	1.51	1.54	1.71	3.03	2.96	3.62	0.49	0.43	0.6	0.46	0.29	0.59	102	98	111	203	186	231	30	28	38	30	19	39	1.36383	9.46245e-10	3.73637e-09	up	NA	NA	NA	NA	-1.57503	2.81392e-06	5.71475e-06	down	2.84354	1.3515e-26	1.11032e-25	up	-1.54102	1.40328e-07	7.75939e-07	down	-2.89644	2.62191e-25	7.43113e-24	down	1A
TraesCS1A02G120500	10.53	11.47	9.53	22.45	15.19	19.38	8.09	9.08	7.36	19.75	23.27	18.47	344	355	300	730	464	600	238	287	228	626	743	591	1.21416	1.88104e-11	8.4358e-11	up	1.46237	1.19943e-28	6.54716e-28	up	1.21997	2.78732e-19	1.20084e-18	up	1.40463	3.28941e-15	1.50206e-14	up	-0.25309	0.0920173	0.160854	false	0.0506079	0.75088	0.839456	false	1A
TraesCS1A02G121200	0.99	0.76	0.67	0.68	0.97	0.75	0.55	0.47	0.37	0.97	1.07	1.08	143	104	93	98	131	103	72	66	51	136	151	152	0.333758	0.213978	0.276354	false	1.29417	4.44414e-08	1.06257e-07	up	0.61834	0.00707988	0.0104978	false	0.958485	0.000701201	0.00130729	false	-0.685776	0.0102649	0.0245955	false	0.325419	0.147387	0.259849	false	1A
TraesCS1A02G121800	0.17	0.07	0.03	1.49	0.96	1.07	0.47	0.03	0.3	4.74	4.84	4.37	12	5	2	105	64	72	30	2	20	326	336	304	4.03825	1.10433e-14	6.14994e-14	up	4.27698	6.74371e-07	1.49315e-06	up	5.91718	2.49993e-54	2.74541e-53	up	2.34706	5.81193e-06	1.34461e-05	up	NA	NA	NA	NA	1.9267	5.0594e-20	1.00572e-18	up	1A
TraesCS1A02G122000	238.25	317.32	279.18	66.26	68.15	67.29	193.24	186.42	178.12	52.86	63.28	56.78	9658	12183	10903	2673	2582	2584	7055	7309	6842	2078	2507	2254	-1.69696	1.044e-51	2.12824e-50	down	-1.55213	1.20123e-128	2.37458e-127	down	-2.01412	6.51918e-97	1.33957e-95	down	-1.28608	6.7735e-54	1.21358e-52	down	-0.472905	6.79582e-08	3.893e-07	false	-0.274633	0.00365595	0.0114513	false	1A
TraesCS1A02G122100	1.34	1.7	1.46	0.46	0.68	0.31	5.09	4.82	5.53	1.65	1.66	1.86	278	334	293	95	132	61	953	969	1089	332	337	379	-1.29154	2.89207e-07	9.29835e-07	down	-1.44124	1.32049e-44	1.01395e-43	down	0.457621	0.00233333	0.00365631	false	-3.23932	1.25081e-66	2.9526e-65	down	1.88834	3.80385e-59	3.29966e-57	up	1.78828	1.7949e-15	2.39557e-14	up	1A
TraesCS1A02G122200	6.18	5.62	4.89	8.91	11.7	12.24	4.36	4.93	4.96	6.44	6.99	8.3	569	490	434	817	1007	1068	362	439	433	575	629	749	1.32345	2.01288e-18	1.37283e-17	up	0.744895	5.77677e-10	1.54455e-09	false	0.635507	2.84363e-06	5.77181e-06	false	1.3821	2.64152e-23	1.88528e-22	up	-0.119701	0.358728	0.477321	false	-0.646401	2.8858e-06	1.55524e-05	false	1A
TraesCS1A02G122500	6.52	6.15	7.46	14.75	14.36	12.35	7.8	7.54	7.56	13.16	10.99	12.14	558	498	615	1256	1148	1001	601	624	613	1092	919	1017	1.3923	7.07899e-24	6.20605e-23	up	0.801633	1.89853e-17	7.3358e-17	false	1.105	1.253e-20	5.74107e-20	up	1.03842	1.67872e-18	9.36877e-18	up	0.29275	0.0106598	0.0254216	false	-0.245553	0.0340695	0.0794036	false	1A
TraesCS1A02G122800	0.32	0.25	0.14	1.4	1.46	1.04	0	0.09	0.04	0.21	0.22	0.1	19	14	8	84	82	59	0	5	2	12	13	6	2.82398	5.7857e-11	2.50212e-10	up	NA	NA	NA	NA	NA	NA	NA	NA	5.15955	1.28311e-14	5.63133e-14	up	NA	NA	NA	NA	-2.93407	1.85426e-11	1.67003e-10	down	1A
TraesCS1A02G123100	3.73	3.19	4.32	10.42	7.11	8.22	5.11	5.9	4.18	10.14	14.05	10.8	111	90	124	309	198	232	137	170	118	293	409	315	1.55296	6.72533e-11	2.89385e-10	up	1.34047	1.42664e-13	4.62997e-13	up	1.8926	8.2568e-22	3.98026e-21	up	0.94915	2.14316e-05	4.70554e-05	false	0.541706	0.0153452	0.034978	false	0.383953	0.0476925	0.104886	false	1A
TraesCS1A02G123600	1.32	1.3	1.56	0.96	0.97	0.97	1.66	1.45	1.34	0.8	0.57	0.64	80	75	91	58	55	56	91	85	77	47	34	38	-0.175194	0.572894	0.638572	false	-1.00854	0.000807449	0.00138213	down	-0.800281	0.0129447	0.0185813	false	-0.434	0.141901	0.182768	false	0.197228	0.431127	0.549688	false	-0.583308	0.0903837	0.176659	false	1A
TraesCS1A02G123700	0	0	0	14.17	11.04	8.32	0	0	0	21.12	22.49	26.79	0	0	0	179	131	100	0	0	0	260	279	333	9.90197	5.0682e-16	3.05094e-15	up	10.7062	2.78294e-19	1.15076e-18	up	10.8723	9.00803e-20	3.96676e-19	up	9.6847	1.95873e-15	9.08562e-15	up	NA	NA	NA	NA	1.01302	2.0834e-06	1.14132e-05	up	1A
TraesCS1A02G124100	2.7	1.49	2.54	5.2	5.13	3.62	1.96	2.14	2.32	6.79	5.22	5.46	107	56	97	205	190	136	70	82	87	261	202	212	1.39629	5.02184e-07	1.58041e-06	up	1.58139	5.84537e-15	2.02803e-14	up	1.62649	1.38616e-11	3.93303e-11	up	1.30129	8.15285e-08	2.19494e-07	up	0.0348443	0.900449	0.933034	false	0.271293	0.184378	0.308359	false	1A
TraesCS1A02G124200	1.84	1.67	2.41	8.96	7.39	7.6	5.04	4.24	4.84	8.18	8.99	7.87	113	97	142	546	423	441	278	251	281	486	538	472	2.36838	9.4894e-33	1.15747e-31	up	0.96531	3.35518e-14	1.12367e-13	false	2.33412	5.68111e-43	5.01578e-42	up	0.948559	2.92768e-09	8.7803e-09	false	1.35856	3.18908e-13	3.10628e-12	up	0.00868694	0.951067	0.970698	false	1A
TraesCS1A02G124600	16.34	18.88	16.16	19.87	21.43	20.69	15.6	14.62	14.72	32.03	29.94	30.19	1142	1250	1088	1382	1400	1370	982	988	975	2171	2045	2066	0.621486	4.37717e-08	1.51294e-07	false	1.17391	7.45733e-63	7.58063e-62	up	1.09939	4.42987e-35	3.26484e-34	up	0.645092	9.67405e-11	3.25237e-10	false	-0.0852626	0.362709	0.481334	false	0.519867	6.58369e-09	4.60101e-08	false	1A
TraesCS1A02G125400	0.48	0.33	0.51	0.74	0.8	0.49	0.43	0.48	0.43	0.87	0.92	0.78	49	32	50	75	76	47	39	47	41	86	91	78	0.959878	0.00906032	0.0162549	false	1.08832	0.000157119	0.0002886	up	1.20926	0.000108584	0.000193917	up	0.788842	0.0229682	0.0344732	false	0.110653	0.750713	0.823879	false	0.290222	0.32235	0.468337	false	1A
TraesCS1A02G125500	7.56	5.77	6.01	8.88	8.52	6.76	26.69	27.97	30.13	37.26	33.91	37.2	379	274	290	443	399	321	1205	1356	1431	1811	1661	1826	0.67	0.000256045	0.000591317	false	0.491047	3.34936e-11	9.62216e-11	false	2.73932	4.15539e-122	1.13096e-120	up	-1.62901	1.67279e-35	1.86456e-34	down	2.23793	9.52601e-81	1.39921e-78	up	2.11147	1.71344e-67	2.18914e-65	up	1A
TraesCS1A02G125900	3.88	2.98	3.36	55.98	44.7	57.91	6.15	8.47	6.46	48.88	54.03	48.74	133	97	111	1912	1434	1883	190	281	210	1627	1812	1638	4.30949	3.61058e-146	3.2996e-144	up	2.98206	1.22152e-162	3.09479e-161	up	4.14429	4.24425e-229	2.92646e-227	up	3.09597	8.1715e-90	2.90581e-88	up	1.15154	1.00782e-08	6.27358e-08	up	-0.12093	0.311227	0.456688	false	1A
TraesCS1A02G126000	2.62	2.96	2.4	4.47	3.87	4.96	2.21	2.71	1.83	3.15	3.63	3.48	113	121	100	192	156	203	86	113	75	132	153	147	1.0917	2.28095e-06	6.71345e-06	up	0.739012	0.000990736	0.00167862	false	0.618246	0.0046191	0.00700517	false	1.16084	1.28705e-06	3.14434e-06	up	-0.131569	0.582727	0.688131	false	-0.42987	0.0352029	0.0815428	false	1A
TraesCS1A02G126100	0.03	0.07	0.07	0.57	0.52	0.87	0.1	0.05	0.01	1.32	0.8	0.8	2	5	5	44	38	64	7	4	1	100	61	61	3.97404	1.91979e-10	7.97808e-10	up	4.28711	1.77615e-14	6.02627e-14	up	4.45675	2.30068e-15	8.15619e-15	up	3.75181	2.91511e-09	8.74346e-09	up	NA	NA	NA	NA	0.525274	0.131632	0.238371	false	1A
TraesCS1A02G126400	0	0	0.05	1.82	1.1	1	0.02	0.02	0.05	1.1	1.2	1.06	0	0	3	120	68	63	1	1	3	71	78	69	6.7509	3.17175e-13	1.60783e-12	up	5.52875	3.91945e-14	1.30956e-13	up	6.42919	1.66287e-12	4.98729e-12	up	5.79977	1.43052e-14	6.25796e-14	up	NA	NA	NA	NA	-0.277966	0.367037	0.514986	false	1A
TraesCS1A02G126900	10.28	10.3	10.87	16.08	13.66	13.02	10.1	10.2	9.66	7.31	6.86	6.82	1137	1079	1159	1770	1413	1365	1006	1092	1013	784	742	739	0.796876	6.12118e-10	2.45063e-09	false	-0.376241	8.68404e-06	1.77259e-05	false	-0.327979	0.000817072	0.00134233	false	0.697583	4.07645e-09	1.20941e-08	false	0.0376067	0.670158	0.760894	false	-1.08199	2.84617e-20	5.74336e-19	down	1A
TraesCS1A02G127900	2.87	2.75	2.7	11.58	12.5	10.93	2.24	2.32	2.64	11.74	11.1	12.47	271	246	245	1087	1102	977	190	212	236	1074	1023	1152	2.42137	5.09756e-73	1.61535e-71	up	2.43064	1.08771e-109	1.83822e-108	up	2.33973	5.47395e-91	1.04246e-89	up	2.46182	1.11304e-78	3.31224e-77	up	-0.10154	0.517693	0.630367	false	-0.0399373	0.700972	0.802512	false	1A
TraesCS1A02G128100	4.41	6.01	4.29	10.34	11.68	11.33	6.13	5.63	5.83	9.56	11.61	9.32	239	308	224	557	591	581	299	295	299	502	614	494	1.53164	1.68503e-20	1.27177e-19	up	0.931045	3.01114e-13	9.62817e-13	false	1.30878	1.30772e-16	4.94039e-16	up	1.10287	4.819e-16	2.3235e-15	up	0.366969	0.0214786	0.0468014	false	-0.18059	0.173089	0.293685	false	1A
TraesCS1A02G129600	2.38	1.95	1.86	0.08	0.25	0.03	3.55	3.2	2.89	0.26	0.31	0.34	93	72	70	3	9	1	125	121	107	10	12	13	-3.81341	1.03215e-10	4.37463e-10	down	-3.25515	1.27813e-19	5.35232e-19	down	-2.49837	2.71201e-09	6.65103e-09	down	-4.61846	5.37958e-19	3.081e-18	down	0.745936	0.00157374	0.0046493	false	NA	NA	NA	NA	1A
TraesCS1A02G129800	2.09	2.08	2.76	1.67	1.12	1.28	3.16	3.73	3.1	2.32	2.45	2.06	88	83	112	70	44	51	120	152	124	95	101	85	-0.411913	0.204834	0.266086	false	-0.411748	0.0619868	0.0826786	false	0.236224	0.361899	0.409529	false	-1.11098	8.25859e-05	0.000171301	down	0.637418	0.00473691	0.0124605	false	0.691738	0.0190798	0.0486688	false	1A
TraesCS1A02G131300	18.56	22.75	19.06	6.93	6.49	6.8	8.81	8.32	8.02	5.83	6.28	6.44	1424	1653	1409	529	465	494	609	617	583	434	471	484	-1.22507	1.15244e-20	8.76968e-20	down	-0.300824	0.00455473	0.0071506	false	-1.44508	1.01282e-39	8.33414e-39	down	-0.13209	0.307009	0.364103	false	-1.1551	1.02097e-29	3.21923e-28	down	-0.177224	0.172929	0.293447	false	1A
TraesCS1A02G131900	39.93	55.74	54.12	20.43	29.66	24.45	19.5	16.25	16.23	7.68	7.21	7.35	1298	1716	1695	661	901	753	571	511	500	242	229	234	-0.661443	1.39461e-05	3.77619e-05	false	-1.08713	9.43994e-17	3.54198e-16	down	-2.49477	3.15263e-77	4.9688e-76	down	0.695996	1.16945e-06	2.86777e-06	false	-1.41879	7.37053e-30	2.33651e-28	down	-1.79307	8.33186e-34	3.4606e-32	down	1A
TraesCS1A02G133300	5.59	6.94	4.37	2.03	5.73	3.71	5.95	5.66	3.77	1.54	2.24	2.35	97	114	73	35	93	61	93	95	62	26	38	40	-0.223522	0.536227	0.604217	false	-1.18763	0.000300337	0.000537079	down	-1.2027	0.000325438	0.000555932	down	-0.258588	0.472398	0.531354	false	-0.0262223	0.922784	0.94865	false	-0.941031	0.0200974	0.0508589	false	1A
TraesCS1A02G133400	9.04	8.51	8.86	11.94	14.19	13.7	7.56	7.44	7.68	13.71	13.17	14.99	1025	913	967	1347	1503	1471	772	816	825	1507	1459	1663	0.940254	2.92973e-16	1.78695e-15	false	1.02117	5.38464e-38	3.63733e-37	up	0.919639	7.61502e-23	3.82946e-22	false	0.991192	2.80566e-21	1.81516e-20	false	-0.112002	0.228328	0.335291	false	0.0208456	0.835493	0.897649	false	1A
TraesCS1A02G133500	13.31	15.69	14.78	4.64	6.08	5.22	12.66	12.88	14.22	4.37	4.87	4.61	2103	2348	2250	729	898	782	1801	1969	2129	669	752	713	-1.11095	4.27672e-20	3.16431e-19	down	-1.38453	1.56692e-67	1.68563e-66	down	-1.40466	1.00992e-49	1.01633e-48	down	-1.14113	6.6105e-25	5.05734e-24	down	-0.0307535	0.717402	0.797926	false	-0.252684	0.0372878	0.0855739	false	1A
TraesCS1A02G133900	1.21	1.09	1.35	0.5	0.76	0.63	1.6	1.44	1.76	1.1	0.6	1	95	81	102	39	56	47	113	109	131	84	46	77	-0.603651	0.0610604	0.0914172	false	-0.688426	0.00965571	0.0145322	false	-0.177617	0.553177	0.598852	false	-1.16405	5.58386e-05	0.000117882	down	0.500135	0.0269391	0.056949	false	0.465692	0.17732	0.299351	false	1A
TraesCS1A02G134000	4.19	3.72	4.58	18.54	12.97	16.89	6.34	6.75	7.39	20.38	18.52	17.09	329	276	346	1447	951	1255	448	512	549	1550	1420	1313	2.31086	1.27008e-42	2.0616e-41	up	1.58839	2.20782e-62	2.23291e-61	up	2.41911	1.20314e-92	2.34407e-91	up	1.42912	2.29436e-21	1.49104e-20	up	0.820084	7.7322e-10	5.32912e-09	false	0.15233	0.267993	0.40915	false	1A
TraesCS1A02G134100	3.32	2.19	2.62	0.33	0.66	0.31	1.58	1.45	1.6	0.25	0.28	0.23	251	157	191	25	47	22	108	106	115	18	21	17	-2.30697	1.37745e-12	6.69349e-12	down	-2.47361	1.90612e-14	6.46063e-14	down	-3.16889	4.44159e-24	2.34233e-23	down	-1.66137	1.07275e-06	2.63841e-06	down	-0.705515	0.000747756	0.00236319	false	NA	NA	NA	NA	1A
TraesCS1A02G135600	8.43	11.35	9.51	4.52	6.18	6.29	5.37	4.61	5.09	3.02	2.55	2.63	1022	1304	1111	546	701	723	587	541	585	355	302	312	-0.436752	0.00399864	0.00765795	false	-0.741663	9.49576e-10	2.51132e-09	false	-1.58027	1.25295e-33	8.91905e-33	down	0.351349	0.0136	0.0212253	false	-0.849691	2.89765e-13	2.83601e-12	false	-1.10244	2.55617e-13	2.78009e-12	down	1A
TraesCS1A02G135700	35.4	36.51	35.99	16.12	17.92	16.96	28.51	29.45	28.62	11.3	12.44	11.61	2974	2905	2913	1348	1407	1350	2157	2393	2278	921	1021	955	-0.732066	1.94878e-13	1.00155e-12	false	-1.15504	2.96548e-61	2.9531e-60	down	-1.3545	8.20841e-62	1.02431e-60	down	-0.583355	1.73496e-10	5.7192e-10	false	-0.210011	0.00260795	0.00730912	false	-0.580537	5.11936e-09	3.61169e-08	false	1A
TraesCS1A02G138100	3.29	3.31	3.43	0.67	0.81	0.84	4.36	4.93	5.14	1.09	1.02	0.94	261	248	262	53	60	63	311	378	386	84	79	73	-1.76386	4.59914e-14	2.45715e-13	down	-2.10357	6.49818e-33	3.93813e-32	down	-1.46035	5.56991e-13	1.72115e-12	down	-2.45757	2.70145e-32	2.74103e-31	down	0.632803	7.00252e-06	3.13792e-05	false	0.34509	0.234122	0.369571	false	1A
TraesCS1A02G138400	4.31	4.1	3.75	4.62	5.93	4.71	3.04	3.04	3.37	7.92	6.43	7.57	1271	1147	1067	1356	1636	1316	808	867	942	2266	1856	2189	0.672098	5.01486e-08	1.72447e-07	false	1.3523	7.51819e-56	6.96575e-55	up	1.10529	2.917e-28	1.77545e-27	up	0.868953	3.49426e-14	1.49091e-13	false	-0.257579	0.00761682	0.0189144	false	0.473793	2.98791e-05	0.000140156	false	1A
TraesCS1A02G138800	21.19	28.67	20.51	28.23	36.28	31.81	16.9	16.55	15.42	37.67	37.64	39.33	1526	1955	1423	2023	2442	2170	1096	1153	1052	2631	2649	2773	0.801637	3.06329e-09	1.1595e-08	false	1.36746	1.53036e-94	2.22937e-93	up	0.961918	3.72903e-19	1.59695e-18	false	1.15635	3.44597e-28	3.01843e-27	up	-0.416478	0.000257984	0.000898117	false	0.20149	0.0348531	0.0808932	false	1A
TraesCS1A02G139400	2.68	3.14	2.87	3.63	4.92	4.83	3.18	2.47	2.42	5.84	6.27	6.34	338	375	348	455	580	577	361	301	289	714	772	782	0.970017	1.11072e-09	4.36132e-09	false	1.33178	1.00618e-28	5.51246e-28	up	1.34243	1.5286e-29	9.68641e-29	up	0.908337	2.44286e-08	6.83207e-08	false	6.85728e-05	0.999629	0.999782	false	0.413576	0.00173552	0.00587768	false	1A
TraesCS1A02G139900	48.54	38.87	43.81	209.21	175.61	197.4	67.15	74.28	66.89	182.82	190.02	181.96	3133	2376	2724	13436	10593	12069	3903	4637	4091	11443	11985	11500	2.50218	5.03579e-90	2.12961e-88	up	1.54999	6.30571e-187	1.89936e-185	up	2.33368	1.00997e-163	4.12414e-162	up	1.66724	9.7891e-59	1.9513e-57	up	0.773365	2.37496e-17	3.36991e-16	false	-0.125098	0.179359	0.302007	false	1A
TraesCS1A02G140600	1.15	1.85	0.96	0.64	0.63	0.78	0.18	0.23	0.14	0.21	0.18	0.18	211	321	169	117	108	136	30	40	25	38	33	33	-0.588739	0.0237994	0.0391545	false	NA	NA	NA	NA	-2.50606	3.70455e-18	1.5101e-17	down	2.07879	2.42714e-11	8.57724e-11	up	-2.7306	8.07837e-22	1.6064e-20	down	-1.8742	1.27717e-10	1.05602e-09	down	1A
TraesCS1A02G140700	18.65	18.85	16.13	4.38	8.05	5.77	5.23	3.99	4.18	1.19	0.87	0.82	372	356	310	87	150	109	94	77	79	23	17	16	-1.21949	3.30473e-08	1.15381e-07	down	-2.08001	5.07537e-09	1.28538e-08	down	-3.96365	1.0413e-49	1.04756e-48	down	0.614041	0.0278371	0.0411924	false	-1.8953	1.76401e-25	4.46883e-24	down	-2.70438	2.79318e-14	3.33164e-13	down	1A
TraesCS1A02G141200	0.05	0.06	0.08	0.09	0.23	0.26	0.07	0.13	0.05	0.08	0.05	0.16	10	11	15	17	42	49	12	24	10	16	9	31	1.95197	0.000632431	0.00138251	up	NA	NA	NA	NA	NA	NA	NA	NA	1.38888	0.0130482	0.0204329	up	NA	NA	NA	NA	-1.03233	0.0618862	0.130082	false	1A
TraesCS1A02G141300	0.1	0.23	0.35	1.72	1.92	2.06	0.32	0.16	0.41	1.74	1.52	1.87	6	13	20	100	105	114	17	9	23	99	87	107	3.39562	5.07763e-17	3.2309e-16	up	2.65964	1.61452e-13	5.22349e-13	up	3.15258	2.56129e-15	9.05898e-15	up	2.85255	2.05508e-14	8.89535e-14	up	NA	NA	NA	NA	-0.201449	0.406205	0.5537	false	1A
TraesCS1A02G141400	1.4	1.5	1.51	0.98	1.22	1.33	0.94	0.62	0.71	0.53	0.5	0.7	231	235	240	161	189	209	140	99	111	85	81	113	0.0307911	0.876845	0.90278	false	-0.251612	0.308215	0.357639	false	-1.09323	1.79266e-07	3.94008e-07	down	0.822073	0.000367545	0.000708303	false	-0.853105	1.02198e-05	4.46879e-05	false	-1.08261	2.20403e-06	1.20417e-05	down	1A
TraesCS1A02G141700	2.39	3.97	4.72	5.44	5.74	5.67	2.18	2.18	2.6	4.78	3.88	4.79	213	335	405	482	478	478	175	188	219	413	338	418	0.95595	3.67163e-06	1.05958e-05	false	1.08868	3.9952e-13	1.26957e-12	up	0.537691	0.00700647	0.0103938	false	1.4566	3.88995e-21	2.50094e-20	up	-0.562321	0.00672437	0.0169745	false	-0.376699	0.00679822	0.0198388	false	1A
TraesCS1A02G142000	12.18	9.32	10.7	10.66	8.03	8.03	23.31	25.43	26.68	9.84	10.63	9.27	748	542	633	651	461	467	1289	1510	1552	586	638	557	0.0844356	0.625709	0.686197	false	-1.2053	2.5509e-41	1.84184e-40	down	0.138456	0.290169	0.33546	false	-1.31046	4.85023e-21	3.10028e-20	down	1.33348	1.76398e-33	6.62195e-32	up	0.0976775	0.512203	0.650679	false	1A
TraesCS1A02G142700	7.23	7.76	8.53	1.86	3.6	1.79	5.66	5.4	5.9	3.98	4.33	3.09	234	238	266	60	109	55	165	169	181	125	137	98	-1.35941	3.6301e-07	1.15754e-06	down	-0.434568	0.0301035	0.0422084	false	-0.788637	8.85524e-05	0.000159321	false	-1.05464	0.000109162	0.000223563	down	-0.364608	0.0272694	0.0575564	false	0.609548	0.0403099	0.091306	false	1A
TraesCS1A02G142900	0.64	0.51	0.69	1.17	0.99	0.71	0.99	1	1.16	1.12	0.84	1.22	60	45	62	109	87	63	84	91	103	102	77	112	0.997959	0.00238706	0.00475608	false	0.148213	0.545277	0.593914	false	1.04877	0.000339033	0.000578263	up	0.0470565	0.868099	0.89121	false	0.890178	0.000901003	0.00280255	false	0.0926517	0.743006	0.83359	false	1A
TraesCS1A02G143000	1.55	1.8	1.82	2.49	2.26	2.54	1.07	0.96	0.93	2.38	2.48	2.59	237	261	269	379	323	369	148	143	135	353	371	389	0.848771	8.40985e-07	2.58882e-06	false	1.46552	2.08935e-22	9.58973e-22	up	0.783206	1.14323e-07	2.54597e-07	false	1.47985	5.56634e-17	2.84557e-16	up	-0.693009	5.50886e-05	0.000215567	false	-0.0227359	0.875191	0.924517	false	1A
TraesCS1A02G143100	11.05	12.25	13.07	45.62	49.86	45.76	13.94	12.26	11.8	64.01	69.32	67.17	523	549	596	2148	2205	2051	594	561	529	2937	3205	3112	2.30633	3.99515e-89	1.66566e-87	up	2.53796	6.91021e-245	2.9543e-243	up	2.71823	2.04937e-199	1.13741e-197	up	2.07508	1.68513e-85	5.62361e-84	up	0.16987	0.150633	0.240611	false	0.4536	9.65864e-08	6.06492e-07	false	1A
TraesCS1A02G143200	1.63	1.89	1.7	0.63	0.6	0.65	1.13	1.2	0.95	0.6	0.4	0.85	183	201	184	70	63	69	114	130	101	65	44	94	-1.12436	4.6131e-06	1.31508e-05	down	-0.684936	0.0149603	0.0219104	false	-1.23858	2.71581e-06	5.5225e-06	down	-0.62172	0.0199487	0.0302755	false	-0.564607	0.00360835	0.00978058	false	-0.0723188	0.824855	0.890794	false	1A
TraesCS1A02G143300	2.19	2.27	2.36	6.93	6.61	7.11	1.88	1.85	2.48	6.33	7.62	7.27	168	165	174	528	473	516	130	137	180	470	570	545	1.94872	1.48559e-32	1.802e-31	up	1.90851	2.88738e-37	1.9217e-36	up	1.89097	2.34106e-37	1.82361e-36	up	1.91548	8.97434e-30	8.37674e-29	up	-0.0280642	0.884286	0.921161	false	-0.0149408	0.910064	0.945944	false	1A
TraesCS1A02G143400	1.07	1.34	0.9	0.36	0.43	0.3	0.56	0.63	0.74	0.4	0.46	0.39	772	911	623	260	291	203	366	436	502	278	327	275	-1.24811	4.53257e-12	2.12757e-11	down	-0.483299	0.000559475	0.000973624	false	-1.14241	5.35262e-14	1.75181e-13	down	-0.639435	0.000234274	0.000462193	false	-0.66975	3.29407e-06	1.54144e-05	false	0.147147	0.404967	0.552513	false	1A
TraesCS1A02G144700	1.07	1.31	0.68	0.16	0.64	0.2	1.44	1.02	1.41	0.22	0.18	0.36	55	64	34	8	31	10	67	51	69	11	9	18	-1.28307	0.0197998	0.0331349	down	-2.22135	2.06327e-07	4.73114e-07	down	-1.76207	0.000338266	0.000577003	down	-1.7908	0.000267657	0.000524341	down	0.448324	0.167985	0.262927	false	NA	NA	NA	NA	1A
TraesCS1A02G144800	2.42	2.62	2.54	0.63	0.56	0.85	2.69	2.93	3.06	0.57	0.61	0.42	331	339	335	86	72	110	332	388	397	75	82	56	-1.53715	2.70385e-12	1.28833e-11	down	-2.30709	3.29311e-36	2.14388e-35	down	-1.99078	6.7307e-23	3.39541e-22	down	-1.90469	8.65667e-21	5.46662e-20	down	0.305894	0.019548	0.043173	false	-0.410448	0.162137	0.279544	false	1A
TraesCS1A02G145000	1.37	1.27	1.08	1.68	2.33	1.89	1.49	1.17	1.35	2.48	2.9	2.5	132	116	100	161	210	172	129	109	123	231	273	236	1.00882	1.06836e-05	2.93289e-05	up	1.11487	5.19271e-10	1.39203e-09	up	1.33688	5.1128e-12	1.48742e-11	up	0.736018	0.000731798	0.00136062	false	0.211928	0.328614	0.446007	false	0.369121	0.0469102	0.103462	false	1A
TraesCS1A02G145800	47.56	57.11	53.67	521.06	655.98	615.11	45.32	40.57	41.95	692.05	721.43	722.34	3115	3542	3386	33957	40152	38162	2673	2570	2603	43954	46171	46324	3.84837	1.66436e-297	6.72995e-295	up	4.20036	0	0	up	4.01015	0	0	up	3.98783	0	0	up	-0.200835	0.0141626	0.0326157	false	0.203015	0.0161202	0.0421631	false	1A
TraesCS1A02G145900	1.3	0.52	1.6	2.79	2.25	2.41	3.22	2.17	2.48	3.57	3.98	4.35	21	8	25	45	34	37	47	34	38	56	63	69	NA	NA	NA	NA	0.736503	0.0233247	0.0332362	false	2.04713	1.7872e-06	3.68318e-06	up	0.109082	0.782367	0.817749	false	NA	NA	NA	NA	0.618896	0.0677678	0.139931	false	1A
TraesCS1A02G147100	0	0.03	0	0.4	0.23	0.42	0	0	0	0.78	0.4	0.81	0	2	0	24	13	24	0	0	0	46	24	48	NA	NA	NA	NA	7.82129	1.06306e-09	2.80373e-09	up	6.12892	9.03023e-08	2.02205e-07	up	NA	NA	NA	NA	NA	NA	NA	NA	0.872438	0.0678458	0.140057	false	1A
TraesCS1A02G147400	0.51	0.42	0.43	0.46	0.59	0.72	0.82	0.81	1.11	1.02	0.54	0.52	33	26	27	30	36	44	48	51	68	64	34	33	NA	NA	NA	NA	-0.265117	0.46249	0.513524	false	NA	NA	NA	NA	-0.448093	0.229772	0.281523	false	1.11257	0.00158157	0.00467144	up	0.173977	0.672765	0.781244	false	1A
TraesCS1A02G147700	4.37	4.19	5	1.49	1.43	1.21	3.04	3.2	2.62	2.12	2.63	2.54	206	187	227	70	63	54	129	146	117	97	121	117	-1.36377	4.68562e-08	1.61577e-07	down	-0.145837	0.495951	0.546253	false	-0.641732	0.00187316	0.00296499	false	-0.918793	0.000514847	0.000975549	false	-0.506406	0.00679174	0.0171152	false	0.76421	0.00420448	0.0129646	false	1A
TraesCS1A02G148100	0	0	0	0	0.01	0	0.2	0.31	0.34	0.01	0	0	0	0	0	0	1	0	34	57	61	1	0	0	NA	NA	NA	NA	-7.05551	2.12085e-08	5.16844e-08	down	NA	NA	NA	NA	-6.98641	4.31283e-08	1.18357e-07	down	8.25439	4.31856e-11	3.37979e-10	up	NA	NA	NA	NA	1A
TraesCS1A02G149200	10.45	9.88	11.99	15.46	15.89	15.68	8.81	8.98	8.25	19.79	21.04	19.38	529	474	585	779	752	752	402	440	396	972	1041	961	0.890307	9.54541e-11	4.055e-10	false	1.34587	2.55698e-44	1.9516e-43	up	1.15217	2.65018e-24	1.40969e-23	up	1.03325	6.12348e-17	3.1212e-16	up	-0.204225	0.102492	0.175937	false	0.303946	0.00407013	0.0125877	false	1A
TraesCS1A02G149700	0	0	0.04	0.12	0.19	0.2	0.04	0.02	0	0.28	0.29	0.31	0	0	7	24	36	37	7	4	0	54	57	60	NA	NA	NA	NA	4.03291	1.03247e-11	3.05e-11	up	4.84476	0.000921367	0.00150578	up	NA	NA	NA	NA	NA	NA	NA	NA	0.738411	0.0436722	0.0975064	false	1A
TraesCS1A02G150200	0.65	0.88	0.54	0.5	0.36	0.58	1.11	0.57	0.6	0.24	0.21	0.41	58	74	46	44	30	49	89	49	51	21	18	36	-0.162326	0.675554	0.730815	false	-1.26373	0.00187893	0.00308643	down	-1.00112	0.0157768	0.0223754	down	-0.476695	0.220647	0.271553	false	0.250635	0.452616	0.570219	false	-0.794856	0.0741231	0.15039	false	1A
TraesCS1A02G150400	19.15	16.69	18.74	4.72	4.41	4.81	23.24	19.09	18.77	6.87	7.08	6.47	1627	1343	1534	399	350	387	1778	1569	1511	566	588	538	-1.61873	1.45539e-33	1.82809e-32	down	-1.44324	4.21521e-51	3.61304e-50	down	-1.1643	1.66268e-28	1.02078e-27	down	-1.94877	3.72298e-53	6.55048e-52	down	0.268434	0.00763575	0.0189582	false	0.497092	0.000168078	0.000698004	false	1A
TraesCS1A02G150800	0.06	0.08	0.05	5.08	4.76	4.4	0.08	0.09	0.02	2.07	2.47	1.86	6	7	5	495	436	408	7	9	2	197	236	178	6.58359	1.76051e-65	4.83411e-64	up	5.16632	4.60306e-37	3.05131e-36	up	5.33264	9.6782e-39	7.78193e-38	up	6.36631	5.20685e-62	1.11591e-60	up	NA	NA	NA	NA	-1.20826	1.34225e-13	1.50041e-12	down	1A
TraesCS1A02G150900	1.94	1.6	1.71	45.8	45.71	48.09	5.09	4.52	4.76	71.94	73.72	74.18	189	148	161	4447	4168	4445	447	427	440	6807	7029	7087	5.08156	0	0	up	4.07377	0	0	up	5.64062	0	0	up	3.46301	1.86768e-266	4.80666e-264	up	1.55754	3.01107e-26	8.02134e-25	up	0.601849	1.43789e-14	1.76181e-13	false	1A
TraesCS1A02G151000	7.86	7.58	8.16	19.12	17.8	21.02	7.95	6.28	7.75	21.14	22.8	21.84	384	351	384	930	813	973	350	297	359	1002	1089	1045	1.64803	2.16291e-31	2.51654e-30	up	1.72003	5.63136e-60	5.50852e-59	up	1.73394	3.19735e-57	3.6841e-56	up	1.5828	1.5296e-29	1.41255e-28	up	0.0037462	0.978394	0.98564	false	0.128911	0.251882	0.390386	false	1A
TraesCS1A02G151200	0.46	0.56	0.51	0.6	0.44	0.84	0.32	0.43	0.28	0.7	0.59	0.52	43	50	46	56	39	75	27	39	25	64	54	48	0.661906	0.0810683	0.117669	false	0.951402	0.00830189	0.0126024	false	0.503455	0.136347	0.167803	false	1.05833	0.00906784	0.0145652	up	-0.459024	0.213648	0.318337	false	-0.114248	0.743026	0.833593	false	1A
TraesCS1A02G151400	0.06	0.02	0	0	0	0.02	9.95	12.42	12.23	1.68	1.45	1.47	3	1	0	0	0	1	429	575	555	78	68	69	NA	NA	NA	NA	-2.77318	5.89003e-60	5.7606e-59	down	5.99794	1.32868e-13	4.25743e-13	up	-10.3484	3.71297e-18	2.03423e-17	down	8.75884	1.44333e-32	5.21228e-31	up	7.56673	9.748e-10	7.34542e-09	up	1A
TraesCS1A02G151500	3	3.24	2.98	1.74	1.56	2.05	3.96	3.39	3.59	1.21	1.46	1.71	199	204	191	115	97	129	237	218	226	78	95	111	-0.431489	0.0570509	0.0860119	false	-1.18287	1.68922e-09	4.40089e-09	down	-0.818301	0.000154792	0.000272491	false	-0.847565	5.55076e-05	0.000117204	false	0.353928	0.0283971	0.0595843	false	-0.343738	0.174913	0.296083	false	1A
TraesCS1A02G152200	5.66	5.6	5.33	6.12	8.52	6.84	3.56	4.24	4.24	8.17	7.6	8.58	943	883	855	1015	1327	1079	534	683	670	1320	1237	1399	0.717419	3.46668e-08	1.20864e-07	false	1.1517	2.99942e-35	1.91382e-34	up	0.808922	1.35948e-17	5.39677e-17	false	1.01028	1.89855e-14	8.23717e-14	up	-0.353373	0.000939789	0.00291166	false	0.131918	0.262202	0.402504	false	1A
TraesCS1A02G152300	1.11	1.18	1.14	0.45	0.68	0.42	1.22	1.2	1.56	0.46	0.42	0.52	281	283	278	114	161	101	278	295	376	114	104	128	-0.799815	0.000239193	0.000554984	false	-1.3728	1.17347e-14	4.0141e-14	down	-1.03615	2.20007e-08	5.11509e-08	down	-1.18613	2.22813e-08	6.25311e-08	down	0.326313	0.0303237	0.0630095	false	-0.196555	0.423626	0.570534	false	1A
TraesCS1A02G152600	0	0	0	0	0	0	0.05	0.09	0.02	1.73	2.47	2.67	0	0	0	0	0	0	2	4	1	75	108	117	NA	NA	NA	NA	5.50244	2.03288e-18	8.14409e-18	up	9.33225	2.4359e-14	8.13087e-14	up	NA	NA	NA	NA	NA	NA	NA	NA	9.00767	2.12533e-13	2.33194e-12	up	1A
TraesCS1A02G152800	9.11	10.15	10.41	16.45	14.05	14.19	24.82	23.49	23.12	16.6	15.82	18.96	414	437	456	744	597	611	1016	1033	996	732	703	844	0.945054	2.44633e-10	1.00804e-09	false	-0.337707	0.000230482	0.000416505	false	1.04828	6.00256e-18	2.42315e-17	up	-0.492072	6.65293e-05	0.000139506	false	1.37538	2.37531e-40	1.15816e-38	up	0.146003	0.256685	0.396079	false	1A
TraesCS1A02G153100	9.13	6.88	8.4	30.95	26.2	27.57	9.92	10.58	10.47	25.41	23.95	23.61	1150	821	1019	3880	3085	3290	1126	1289	1250	3104	2948	2913	2.1472	1.22792e-55	2.74174e-54	up	1.3731	8.33237e-100	1.28542e-98	up	1.83325	3.65852e-69	5.09832e-68	up	1.63613	1.57032e-52	2.72349e-51	up	0.449759	4.11222e-05	0.000164333	false	-0.27088	0.0060913	0.0179994	false	1A
TraesCS1A02G153900	9.75	10.84	9.51	12.55	15.12	11.32	7.37	7.46	7.02	13.4	13.17	13.47	1125	1185	1057	1441	1631	1237	766	833	768	1500	1485	1522	0.72049	8.56029e-09	3.12687e-08	false	1.01055	2.19708e-40	1.55955e-39	up	0.667911	5.33748e-14	1.74704e-13	false	1.01264	7.9475e-18	4.26835e-17	up	-0.353373	0.000185535	0.000662466	false	-0.0116044	0.915058	0.948852	false	1A
TraesCS1A02G155500	2.06	2.58	2.22	1.28	1.6	1.06	3.43	2.94	2.71	2.19	2.05	1.49	164	194	170	101	119	80	246	226	204	169	159	116	-0.452312	0.063332	0.0944851	false	-0.526789	0.00602934	0.00932304	false	-0.00248191	0.990749	0.992314	false	-1.02686	3.81963e-06	8.98292e-06	down	0.513145	0.00331194	0.00905759	false	0.490682	0.0473993	0.104375	false	1A
TraesCS1A02G155900	2	3.45	1.79	1.93	1.15	1.42	2.56	3.02	2.35	1.15	1.38	0.9	52	85	45	50	28	35	60	76	58	29	35	23	-0.320168	0.437206	0.508759	false	-1.07388	0.00206737	0.00337876	down	-0.818482	0.0414202	0.0554833	false	-0.627844	0.0860227	0.115959	false	0.244216	0.439866	0.558183	false	NA	NA	NA	NA	1A
TraesCS1A02G156000	0.7	0.68	0.6	0.26	0.25	0.17	0.48	0.5	0.52	0.19	0.14	0.07	78	72	64	29	26	18	48	54	55	21	15	8	-1.18579	0.0025762	0.00509988	down	-1.75092	6.54874e-05	0.000124333	down	-2.03177	2.1666e-06	4.43771e-06	down	-0.955544	0.0185064	0.0282255	false	-0.29147	0.305848	0.422221	false	NA	NA	NA	NA	1A
TraesCS1A02G156100	0.81	0.84	0.55	1.5	0.4	1.19	0.56	0.45	0.48	0.17	0.04	0.17	43	42	28	79	20	60	27	23	24	9	2	9	0.868102	0.0671121	0.099456	false	NA	NA	NA	NA	NA	NA	NA	NA	1.25532	0.00955402	0.0152879	up	NA	NA	NA	NA	-3.06964	5.10806e-07	3.00063e-06	down	1A
TraesCS1A02G156200	5.09	6	6.65	2.41	7.17	3.35	3.92	3.28	5.05	1.17	2.33	2.75	85	95	107	40	112	53	59	53	80	19	38	45	-0.12711	0.726913	0.775378	false	-0.832536	0.024834	0.0352533	false	-1.24896	0.000351712	0.000598967	down	0.240699	0.529279	0.586394	false	-0.426468	0.113329	0.190968	false	-1.08533	0.0126029	0.0341391	down	1A
TraesCS1A02G156400	0.67	0.72	0.5	2.93	3.6	3.76	0.87	0.82	0.76	3.84	4.52	4.86	47	48	34	205	237	251	55	56	51	262	311	335	2.7942	2.32872e-28	2.44798e-27	up	2.56689	6.9657e-38	4.69524e-37	up	3.06249	1.19138e-42	1.04428e-41	up	2.24732	2.24241e-22	1.53031e-21	up	0.485659	0.133285	0.218197	false	0.310461	0.0715406	0.14611	false	1A
TraesCS1A02G157600	1.95	2.45	2.71	0.75	0.7	0.78	1.12	1.51	1.38	0.91	1.29	1.15	219	261	293	84	73	83	113	164	147	99	142	126	-1.32179	1.56895e-08	5.6194e-08	down	-0.12366	0.57187	0.619495	false	-0.830245	6.69365e-05	0.000121664	false	-0.666086	0.00800187	0.0129513	false	-0.716833	0.000160899	0.000580981	false	0.534327	0.0354412	0.0819717	false	1A
TraesCS1A02G157800	2.66	2.32	2.83	0.73	0.71	1.16	3.8	3.37	4.07	0.65	0.48	0.24	80	66	82	22	20	33	103	98	116	19	14	7	-1.23335	0.00168784	0.00344858	down	-2.90411	4.70233e-15	1.63851e-14	down	-2.26152	1.50452e-07	3.32456e-07	down	-1.92667	1.77855e-08	5.02971e-08	down	0.631569	0.00862414	0.0211062	false	NA	NA	NA	NA	1A
TraesCS1A02G157900	0.2	0.13	0.25	4.97	2.86	4.12	0.68	0.62	0.79	4.17	4.21	4.84	14	9	17	348	188	275	43	42	53	285	290	334	4.71131	2.34205e-42	3.77464e-41	up	2.80086	9.29407e-43	6.88997e-42	up	4.75303	2.90226e-58	3.40794e-57	up	2.70754	2.53558e-24	1.88961e-23	up	1.94191	9.19248e-06	4.04752e-05	up	0.0866359	0.667405	0.777534	false	1A
TraesCS1A02G158300	9.75	8.65	10.3	22.2	14.02	15.73	13.4	14.41	12.44	18.64	19.1	15.22	282	237	287	639	379	431	349	403	341	523	540	431	1.21421	1.73991e-09	6.72278e-09	up	0.533249	3.29859e-05	6.43363e-05	false	1.13843	2.4668e-14	8.23176e-14	up	0.557474	0.00255624	0.00443938	false	0.594609	3.37931e-05	0.000136761	false	-0.0312868	0.860448	0.914678	false	1A
TraesCS1A02G158400	8.99	9.12	9.11	5.02	4.93	6.31	6.96	5.65	6.26	3.63	3.87	2.8	587	564	573	326	301	390	409	357	387	230	247	179	-0.392071	0.0137282	0.0237672	false	-0.733948	2.18596e-06	4.66793e-06	false	-1.14606	2.37325e-14	7.92774e-14	down	-0.0310092	0.849772	0.875636	false	-0.42298	0.000449848	0.00149206	false	-0.711082	9.3557e-05	0.000405729	false	1A
TraesCS1A02G158600	77.85	72.46	76.42	199.51	162.09	195.61	53.33	57.08	55.1	179.96	173.39	167.13	4618	4071	4367	11776	8986	10992	2849	3275	3097	10352	10051	9708	1.65165	1.04508e-43	1.75227e-42	up	1.78994	3.62302e-268	1.77403e-266	up	1.45367	5.49869e-96	1.11557e-94	up	1.93672	8.11293e-73	2.17073e-71	up	-0.346843	1.43309e-06	7.04703e-06	false	-0.154415	0.125277	0.228858	false	1A
TraesCS1A02G158700	10.22	11.8	9.68	10.8	15.16	12.32	7.03	7.65	6.95	13.12	12.96	14	1442	1577	1316	1517	2000	1647	894	1044	929	1796	1787	1935	0.617829	1.55715e-06	4.66875e-06	false	1.02664	1.78786e-42	1.31818e-41	up	0.595117	9.66093e-11	2.59529e-10	false	0.999059	5.23421e-17	2.67985e-16	false	-0.442376	5.47074e-06	2.48536e-05	false	0.0178137	0.87288	0.922997	false	1A
TraesCS1A02G158900	5.23	6.29	5.1	6.58	8.96	6.36	4.51	3.69	4.14	7.12	5.87	6.09	588	670	553	737	942	678	457	402	441	777	645	671	0.74406	8.76296e-07	2.69204e-06	false	0.766997	3.28295e-11	9.43592e-11	false	0.45634	0.00026566	0.000457539	false	1.00448	5.86399e-12	2.16143e-11	up	-0.321568	0.0104498	0.0249804	false	-0.247524	0.075656	0.152865	false	1A
TraesCS1A02G159200	0.7	0.2	0.77	1.22	1.37	0.94	0.36	0.59	0.71	0.91	0.59	0.75	64	17	68	111	117	81	30	52	61	81	53	67	1.41786	0.000399662	0.000899179	up	0.579859	0.0824283	0.10748	false	0.682523	0.103548	0.130179	false	1.26597	7.80143e-05	0.000162206	up	0.0925366	0.830741	0.883273	false	-0.695764	0.0141069	0.0375939	false	1A
TraesCS1A02G160800	1.1	1	0.88	3.93	4.19	2.84	1.1	1.35	1.06	2.99	3.1	3.75	89	76	68	315	316	217	80	105	81	234	244	296	2.22909	2.82833e-22	2.31073e-21	up	1.6231	3.85088e-17	1.46921e-16	up	1.9798	1.31206e-21	6.26046e-21	up	1.82166	1.15505e-16	5.79119e-16	up	0.3462	0.172998	0.269228	false	-0.207832	0.259916	0.399983	false	1A
TraesCS1A02G161200	1.31	1.79	1.71	0.73	0.4	0.38	0.02	0	0	0	0.03	0.03	77	100	97	43	22	21	1	0	0	0	2	2	-1.30733	0.000714364	0.00154912	down	NA	NA	NA	NA	-5.85351	3.48929e-13	1.09135e-12	down	NA	NA	NA	NA	-7.84069	1.3686e-10	1.01923e-09	down	NA	NA	NA	NA	1A
TraesCS1A02G161300	4.63	4.4	5.99	1.21	0.95	1.4	5.06	4.05	4.6	1.55	2.17	1.99	188	169	234	49	36	54	185	159	177	61	86	79	-1.71978	1.19949e-09	4.69707e-09	down	-1.1264	3.62326e-07	8.16919e-07	down	-1.14128	1.76573e-06	3.64002e-06	down	-1.75627	5.5428e-11	1.90146e-10	down	-0.0252888	0.893002	0.927324	false	0.621732	0.0553798	0.118713	false	1A
TraesCS1A02G161400	0.41	0.78	0.51	0.7	0.42	0.14	0.24	0.32	0.35	0.08	0.03	0.18	37	67	45	63	36	12	20	28	30	7	3	16	-0.0663186	0.896364	0.91844	false	NA	NA	NA	NA	-2.27638	6.36881e-05	0.000115981	down	NA	NA	NA	NA	-0.78532	0.0462531	0.0903855	false	NA	NA	NA	NA	1A
TraesCS1A02G161900	10.09	9.63	8.98	20.71	17.73	19.9	10.25	13.23	9.54	26.81	30.16	26.3	363	328	311	741	596	678	332	460	325	935	1060	926	1.37695	1.10222e-19	7.99495e-19	up	1.47033	7.0514e-34	4.36839e-33	up	1.7916	1.75034e-52	1.85432e-51	up	1.00427	1.95433e-10	6.41587e-10	up	0.310659	0.0397428	0.0793993	false	0.458139	0.000173746	0.000719868	false	1A
TraesCS1A02G162200	0.94	0.62	0.87	0.2	0.27	0.19	1.39	0.77	0.95	0.38	0.83	0.64	95	59	84	20	25	18	126	75	91	37	82	63	-1.5509	0.000116508	0.000282424	down	-0.609602	0.0561091	0.0753461	false	-0.139464	0.681705	0.720084	false	-2.07159	3.33359e-08	9.2276e-08	down	0.459736	0.101157	0.173996	false	1.45293	0.000598236	0.00223668	up	1A
TraesCS1A02G162400	3.28	3.5	3.54	6.51	5.88	6.42	3.31	3.94	3.27	5.25	4.6	5.08	231	233	240	456	387	428	210	268	218	358	316	350	1.21983	1.42713e-13	7.40483e-13	up	0.64007	1.12042e-05	2.26808e-05	false	0.787677	2.05021e-07	4.48801e-07	false	1.02122	3.05965e-10	9.90004e-10	up	0.136797	0.391059	0.51022	false	-0.389492	0.00670269	0.0196022	false	1A
TraesCS1A02G162600	0.32	0.48	0.54	0.09	0.31	0.27	0.3	0.52	0.33	0.14	0.16	0.12	29	41	47	8	26	23	24	45	28	12	14	11	-0.674796	0.208028	0.269613	false	NA	NA	NA	NA	-1.41678	0.00522321	0.00787193	down	NA	NA	NA	NA	-0.123783	0.757643	0.828863	false	NA	NA	NA	NA	1A
TraesCS1A02G163000	0.98	0.64	0.86	0.53	0.21	0.21	1.22	1.01	1.53	0.31	0.08	0.46	39	24	33	21	8	8	44	39	58	12	3	18	NA	NA	NA	NA	-2.01463	9.88478e-05	0.000184689	down	NA	NA	NA	NA	-1.78069	0.000602616	0.00113274	down	0.712222	0.053823	0.102714	false	NA	NA	NA	NA	1A
TraesCS1A02G163100	0.49	0.53	0.25	0.11	0.12	0.16	0.96	0.94	0.71	0.15	0.27	0.16	45	46	22	10	10	14	79	83	61	13	24	14	-1.36012	0.0166135	0.0282813	down	-2.04896	1.07569e-07	2.51133e-07	down	-0.898338	0.0784003	0.100635	false	-2.56347	4.19095e-09	1.24235e-08	down	1.13959	0.000692917	0.00220825	up	NA	NA	NA	NA	1A
TraesCS1A02G163500	1.28	1.86	1.59	0.54	0.62	0.73	1.23	1.28	1.43	0.68	0.49	0.66	89	122	106	37	40	48	77	86	94	46	33	45	-0.97595	0.00257136	0.00509097	false	-0.96857	0.00107415	0.0018131	false	-1.10854	0.000301313	0.000516081	down	-0.886637	0.00516053	0.00858773	false	-0.150708	0.532532	0.643883	false	-0.0909413	0.807734	0.879683	false	1A
TraesCS1A02G163700	0.95	0.78	1.86	0.65	1.26	1.04	2.75	2.36	1.93	2.86	2.9	2.21	54	42	102	37	67	56	141	130	104	158	161	123	0.054329	0.893358	0.915948	false	0.316145	0.141699	0.176798	false	1.4038	3.78969e-06	7.62271e-06	up	-1.08254	0.000316271	0.000613855	down	1.07727	0.000326531	0.00111474	up	1.38819	7.13824e-07	4.12575e-06	up	1A
TraesCS1A02G164300	2.25	3.7	2.46	1.18	1.4	1.61	1.07	1.16	0.83	0.87	1.07	1.05	238	370	250	124	138	161	102	118	83	89	110	109	-0.653456	0.00486111	0.00915905	false	0.104107	0.661656	0.704123	false	-1.23329	2.56461e-08	5.93905e-08	down	0.632577	0.0100362	0.0160059	false	-1.34872	4.04227e-10	2.86338e-09	down	-0.537405	0.0207941	0.0523726	false	1A
TraesCS1A02G164600	1.08	1.16	0.64	2.6	2.39	2.17	0.66	0.38	0.44	1.42	0.89	1.17	67	68	38	160	138	127	37	23	26	85	54	71	1.66525	8.94513e-09	3.262e-08	up	1.36415	0.000123673	0.00022932	up	0.529744	0.114775	0.143178	false	2.44963	1.04773e-15	4.95145e-15	up	-0.845151	0.0262672	0.0557227	false	-1.09338	1.96831e-05	9.47568e-05	down	1A
TraesCS1A02G164700	15.84	14.38	16.51	5.5	5.96	5.34	15.05	16.42	16.33	3.61	4.58	4.47	1331	1145	1337	460	468	425	1139	1335	1301	294	376	368	-1.12831	2.97698e-18	2.01639e-17	down	-1.78021	8.11843e-66	8.55296e-65	down	-1.63024	1.57847e-40	1.31974e-39	down	-1.329	3.52773e-31	3.4503e-30	down	0.139792	0.13187	0.216228	false	-0.460044	0.00162706	0.00554458	false	1A
TraesCS1A02G164800	1.84	1.65	1.54	4.84	3.55	4.06	0.89	1.08	0.75	0.28	0.19	0.31	129	110	104	338	233	270	56	73	50	19	13	21	1.66331	2.20262e-14	1.20123e-13	up	-1.6735	2.74125e-05	5.38179e-05	down	-2.44554	2.84875e-12	8.42163e-12	down	2.38375	5.06787e-24	3.72783e-23	up	-0.782608	0.00225052	0.00640707	false	-4.06534	1.20913e-44	7.57995e-43	down	1A
TraesCS1A02G165400	0	0	0	0.39	0	0.21	1.03	1.1	0.66	0.09	0.05	0.03	0	0	0	23	0	12	55	63	37	5	3	2	NA	NA	NA	NA	-3.87348	4.71319e-10	1.26631e-09	down	NA	NA	NA	NA	-1.99353	0.111909	0.147325	false	8.29021	3.32403e-11	2.63577e-10	up	NA	NA	NA	NA	1A
TraesCS1A02G165500	0	0	0	0	0	0	1.7	2.2	1.94	1.92	2.59	1.82	0	0	0	0	0	0	204	284	245	248	338	238	NA	NA	NA	NA	0.253481	0.141449	0.176504	false	10.7913	2.07757e-19	9.00547e-19	up	-10.2217	1.77587e-17	9.35722e-17	down	10.5273	1.26214e-18	1.98557e-17	up	10.4669	2.67037e-18	4.65948e-17	up	1A
TraesCS1A02G165700	94.65	88.91	94.41	84.78	93.6	93.13	81.62	76.57	79.11	29.7	29.85	28.74	6362	5660	6114	5671	5880	5930	4941	4978	5039	1936	1961	1892	0.314554	0.000908078	0.00193822	false	-1.28865	2.87176e-126	5.55896e-125	down	-1.39968	1.48577e-81	2.47698e-80	down	0.374871	3.33155e-06	7.87285e-06	false	-0.121513	0.0695736	0.127302	false	-1.67235	1.89425e-94	4.5454e-92	down	1A
TraesCS1A02G165900	0.5	1.02	0.76	1.95	2.65	4.24	3.12	3.5	4.42	7.87	9.18	8.07	15	29	22	58	74	120	84	101	125	228	268	236	2.30228	3.08779e-08	1.08107e-07	up	1.32346	3.82794e-12	1.15823e-11	up	3.71674	3.97989e-42	3.44731e-41	up	-0.140445	0.651249	0.69984	false	2.38128	5.88726e-13	5.56685e-12	up	1.45659	5.91368e-09	4.148e-08	up	1A
TraesCS1A02G166000	7.22	4.97	6.39	41.69	40.09	40.34	0.47	0.19	0.05	0.43	0.1	0.1	155	101	132	890	804	820	9	4	1	9	2	2	3.06458	7.10764e-74	2.29043e-72	up	NA	NA	NA	NA	-4.64849	1.62956e-19	7.09431e-19	down	7.63746	1.88122e-77	5.48007e-76	up	-4.62989	8.8544e-22	1.75479e-20	down	-7.67257	8.41105e-74	1.30887e-71	down	1A
TraesCS1A02G166100	48.58	42.01	53.41	272.11	239.11	303.91	27.37	29.69	26.7	59.62	62.69	57.97	2160	1769	2288	12040	9937	12802	1096	1277	1125	2571	2724	2524	2.85341	7.15401e-106	3.84299e-104	up	1.24269	9.11136e-71	1.02105e-69	up	0.578233	2.39832e-09	5.8969e-09	false	3.46677	1.86679e-215	2.98377e-213	up	-0.674946	2.6348e-11	2.11258e-10	false	-2.23191	8.20908e-105	2.50706e-102	down	1A
TraesCS1A02G166200	5.82	3.13	3.7	69.43	61.85	79.85	3.62	4.09	4.07	39.23	47.47	33.99	175	89	107	2076	1737	2273	98	119	116	1143	1394	1000	4.40958	2.74861e-121	1.8566e-119	up	3.49195	2.29247e-135	4.76885e-134	up	3.50542	1.52219e-30	9.93428e-30	up	4.34569	5.60934e-189	6.92468e-187	up	0.00286047	0.990914	0.993934	false	-0.861398	1.32122e-10	1.0907e-09	false	1A
TraesCS1A02G166600	0.04	0	0	5.37	6.11	4.57	0	0.07	0.02	0.54	0.11	0.29	2	0	0	247	264	200	0	3	1	24	5	13	8.83913	3.16574e-17	2.03587e-16	up	NA	NA	NA	NA	NA	NA	NA	NA	7.62338	7.42421e-24	5.42103e-23	up	NA	NA	NA	NA	-4.15686	1.47839e-35	6.61165e-34	down	1A
TraesCS1A02G166900	3.24	4.17	3.2	1.91	3.12	2.08	1.56	1.54	1.79	1.99	2.08	2.16	899	1096	855	526	809	547	391	414	471	535	563	587	-0.235762	0.164828	0.220154	false	0.483122	1.45407e-05	2.91754e-05	false	-0.511863	2.58123e-05	4.85694e-05	false	0.70946	1.87414e-05	4.13911e-05	false	-1.00578	4.65604e-16	5.89005e-15	down	-0.236592	0.133412	0.240899	false	1A
TraesCS1A02G167100	0.4	0.99	0.76	13.87	9.72	11.26	0.3	0.44	0.51	10.5	14.96	11.92	13	31	24	454	299	351	9	14	16	335	481	384	4.3868	1.77669e-52	3.69591e-51	up	5.02602	3.78547e-68	4.11231e-67	up	4.38588	5.83411e-63	7.41243e-62	up	4.97605	6.6147e-58	1.29307e-56	up	NA	NA	NA	NA	0.0432705	0.810514	0.881352	false	1A
TraesCS1A02G167200	7.08	4.19	6.5	12.46	13.05	13.87	9.45	10.66	8.47	19.88	19.22	15.05	173	97	153	303	298	321	208	252	196	471	459	360	1.49373	9.62815e-12	4.40968e-11	up	1.05842	3.84339e-12	1.16284e-11	up	1.85878	4.92631e-21	2.29993e-20	up	0.642614	0.000188931	0.000376764	false	0.790104	0.000160206	0.000578619	false	0.407164	0.0090562	0.0255193	false	1A
TraesCS1A02G168100	6.77	6.4	5.3	3.9	2.76	2.95	8.62	8.4	9.17	3.26	3	3.96	508	455	383	291	194	210	583	610	652	237	220	291	-0.584324	0.00272477	0.00536915	false	-1.22123	1.3892e-21	6.20754e-21	down	-0.599284	0.000199557	0.000348033	false	-1.25787	3.73358e-14	1.59123e-13	down	0.611463	5.45397e-07	2.82036e-06	false	0.028839	0.883063	0.929634	false	1A
TraesCS1A02G168300	0	0.04	0	1.55	1.94	2	0	0	0	0.45	0.52	0.89	0	1	0	39	46	48	0	0	0	11	13	22	7.31871	9.39433e-09	3.42052e-08	up	NA	NA	NA	NA	NA	NA	NA	NA	8.06372	2.45211e-10	7.98917e-10	up	NA	NA	NA	NA	-1.6121	0.000476164	0.00181416	down	1A
TraesCS1A02G168400	5.74	5.21	6.96	5.05	5.1	4.47	5.27	5.18	3.94	2.41	1.58	1.58	312	268	364	273	259	230	258	272	203	127	84	84	0.0563299	0.761633	0.804979	false	-1.23228	7.24151e-09	1.81647e-08	down	-1.42997	3.84038e-11	1.0591e-10	down	0.203673	0.265994	0.320778	false	-0.208743	0.216621	0.321849	false	-1.44488	2.04914e-11	1.84119e-10	down	1A
TraesCS1A02G168600	6.14	5.69	5.53	133.64	126.71	122.35	16.99	14.61	17.77	200.5	184.09	197.01	363	319	315	7865	7004	6855	905	836	996	11500	10640	11410	4.81324	0	0	up	3.69648	0	0	up	5.32058	0	0	up	3.13797	1.76087e-216	2.85962e-214	up	1.61402	1.06448e-43	5.94294e-42	up	0.549951	2.34446e-11	2.09239e-10	false	1A
TraesCS1A02G168800	1.07	1.13	0.9	0.54	0.33	0.57	0.5	0.29	0.5	0.64	0.52	0.79	83	83	67	42	24	42	35	22	37	48	39	60	-0.737717	0.0462755	0.0712923	false	0.722446	0.0574702	0.0770542	false	-0.416991	0.188012	0.225386	false	NA	NA	NA	NA	-1.15046	0.000475562	0.00156834	down	0.365027	0.34986	0.497127	false	1A
TraesCS1A02G168900	8.67	8.5	8.99	12.78	14.38	14.09	10.47	10.2	10.05	19.77	20.59	20.67	772	717	771	1133	1197	1189	840	879	848	1708	1792	1803	1.00594	9.09954e-18	6.01434e-17	up	1.12779	2.95886e-55	2.70987e-54	up	1.47766	3.36832e-62	4.22751e-61	up	0.605289	6.64541e-09	1.94245e-08	false	0.339387	0.000370854	0.00125105	false	0.513529	3.88996e-08	2.54095e-07	false	1A
TraesCS1A02G169000	7.63	8.16	7.69	15.77	16.08	15.69	7.67	7.68	8.11	14.05	13.59	15.01	899	911	873	1849	1771	1751	814	875	905	1605	1565	1732	1.36829	1.34444e-36	1.8441e-35	up	0.9999	1.38815e-39	9.68069e-39	false	1.11653	1.31832e-35	9.85083e-35	up	1.20087	2.06634e-34	2.22879e-33	up	0.105997	0.252232	0.362911	false	-0.2096	0.0213486	0.0535355	false	1A
TraesCS1A02G169200	0.34	0.6	0.42	1.72	1.04	1.17	0.52	0.8	0.78	1.31	2.02	1.54	10	17	12	51	29	33	14	23	22	38	59	45	NA	NA	NA	NA	1.35258	0.00110722	0.00186586	up	2.10916	6.6548e-06	1.31472e-05	up	NA	NA	NA	NA	NA	NA	NA	NA	0.253286	0.515662	0.653793	false	1A
TraesCS1A02G169300	2.49	2.07	1.89	3.85	3.21	3.4	2.28	2.45	2.63	3.08	2.96	2.62	182	143	133	280	219	235	150	173	182	218	211	187	1.05009	6.271e-07	1.95364e-06	up	0.36992	0.0314677	0.0439804	false	0.677287	0.000560337	0.000936931	false	0.691592	0.00027945	0.000546228	false	0.296955	0.120606	0.20101	false	-0.329576	0.066546	0.137852	false	1A
TraesCS1A02G169500	4.96	5.16	5.17	1.93	3	2.67	4.01	4.2	4.25	1.25	1.8	1.12	271	267	272	105	153	138	197	222	220	66	96	60	-0.666273	0.00158608	0.00325667	false	-1.4427	2.8234e-11	8.13703e-11	down	-1.62023	1.51347e-13	4.833e-13	down	-0.539134	0.0104351	0.0165936	false	-0.187788	0.21323	0.317883	false	-0.913016	0.000808113	0.00294595	false	1A
TraesCS1A02G170000	6.57	6.7	5.4	13.81	11.9	12.77	6.85	6.58	8.06	11.28	12.02	13.47	471	455	373	985	797	867	442	456	547	784	842	945	1.39698	2.30986e-21	1.81505e-20	up	0.912959	3.8077e-17	1.4531e-16	false	1.23256	3.52733e-23	1.7994e-22	up	1.0261	2.35541e-14	1.01576e-13	up	0.309216	0.019529	0.0431421	false	-0.121081	0.316703	0.462321	false	1A
TraesCS1A02G170200	4.7	5.74	5.04	1.94	2.48	1.99	5.88	5.52	5.98	2.95	2.73	2.74	394	456	407	162	194	158	444	448	475	240	224	225	-0.92539	2.64445e-07	8.5301e-07	false	-0.907092	2.00059e-12	6.14171e-12	false	-0.620685	3.48242e-05	6.48073e-05	false	-1.26209	5.84081e-15	2.62488e-14	down	0.275622	0.026253	0.0557004	false	0.345705	0.0586376	0.124514	false	1A
TraesCS1A02G170700	26.67	25.7	28	3.48	2.01	1.96	22.77	20.84	21.04	2.27	2.36	1.05	1224	1117	1238	159	86	85	941	925	915	101	106	47	-3.07232	7.04234e-54	1.51293e-52	down	-3.37074	8.89872e-24	4.26007e-23	down	-3.5674	2.47699e-26	1.41286e-25	down	-2.92692	1.31716e-52	2.28833e-51	down	-0.207551	0.0232256	0.0500727	false	-0.450242	0.17736	0.299401	false	1A
TraesCS1A02G170800	0.18	0.04	0.11	0.9	1.06	0.84	0.04	0.19	0.18	2.94	2.42	2.99	14	3	8	69	76	61	3	14	13	219	182	225	3.41182	5.5536e-12	2.58913e-11	up	4.46903	1.17391e-38	8.03999e-38	up	4.89561	1.68334e-39	1.38013e-38	up	2.93768	5.32717e-10	1.69312e-09	up	NA	NA	NA	NA	1.52638	1.18843e-11	1.08995e-10	up	1A
TraesCS1A02G170900	1.57	1.16	1.53	1.43	2.27	2.31	3.17	2.77	1.77	5.83	4.02	4.19	92	64	86	83	124	128	167	157	98	331	230	240	0.837752	0.00401739	0.00769061	false	1.00282	3.03084e-06	6.40537e-06	up	1.97644	9.42798e-19	3.95899e-18	up	-0.186528	0.497887	0.556141	false	0.962996	0.000176435	0.000632273	false	1.17907	2.1222e-07	1.29375e-06	up	1A
TraesCS1A02G171000	50.63	41.28	47.44	19.71	15.73	18.59	74.5	80.07	78.21	11.75	12.08	11.78	3923	3030	3542	1520	1139	1365	5199	6001	5743	883	915	894	-1.0132	6.71945e-14	3.55711e-13	down	-2.57131	0	0	down	-1.71443	8.09301e-71	1.15449e-69	down	-1.92136	1.44587e-67	3.48899e-66	down	0.846585	2.26966e-23	4.99937e-22	false	-0.657673	3.09859e-08	2.04342e-07	false	1A
TraesCS1A02G171200	0.99	1.6	1.63	1.1	0.91	0.98	2.46	2.32	2.44	1.56	1.41	1.29	66	101	105	73	57	62	148	150	154	101	92	84	-0.138361	0.664854	0.72123	false	-0.624933	0.00289907	0.00466101	false	0.270947	0.326099	0.373235	false	-1.08503	1.45559e-05	3.24816e-05	down	0.884991	0.00011098	0.000411764	false	0.451989	0.102668	0.195446	false	1A
TraesCS1A02G171300	0.89	0.83	0.72	0.84	0.94	0.23	1.49	2.07	1.02	1.05	0.71	1.1	50	44	39	47	49	12	75	112	54	57	39	60	0.0594658	0.902713	0.923679	false	-0.544415	0.0963044	0.123982	false	0.478724	0.177527	0.213789	false	-1.01381	0.0220625	0.0332195	down	1.01216	0.00168552	0.00494434	up	0.458892	0.311674	0.457141	false	1A
TraesCS1A02G171500	1.16	1.28	0.96	0.37	0.61	0.18	0.76	0.91	1.35	0.24	0.32	0.21	106	111	85	34	52	16	63	81	117	21	29	19	-1.20595	0.00199644	0.00403042	down	-1.83276	3.10157e-07	7.02321e-07	down	-1.88191	5.26455e-08	1.19635e-07	down	-1.20619	0.00279316	0.00482585	down	-0.0588501	0.823902	0.87822	false	NA	NA	NA	NA	1A
TraesCS1A02G171600	18.64	8.65	17.3	12.4	9.97	8.35	7.42	9.54	6.86	4.37	2.89	3.65	198	87	177	131	99	84	71	98	69	45	30	38	-0.188953	0.539654	0.607452	false	-0.990686	0.00186546	0.00306592	false	-1.78069	7.86264e-08	1.76795e-07	down	0.550423	0.0519169	0.0731126	false	-0.800044	0.00442392	0.011721	false	-1.54967	7.98742e-07	4.59238e-06	down	1A
TraesCS1A02G172700	14.6	14.2	16.17	18.06	15.15	17.24	18.81	16.18	14.99	7.3	6.9	6.99	697	642	744	858	676	780	809	747	678	338	322	327	0.519601	0.000267978	0.000617308	false	-1.09963	4.79717e-21	2.1065e-20	down	-0.830376	3.93512e-11	1.08415e-10	false	0.199085	0.144083	0.185347	false	0.258523	0.0241791	0.0518646	false	-1.30688	2.30294e-22	5.45051e-21	down	1A
TraesCS1A02G173100	4.94	5.27	5.72	12.46	13.35	13.25	13.01	13.48	13.22	8.09	9.64	9.47	510	515	568	1279	1287	1295	1208	1345	1292	809	972	956	1.64363	2.94013e-41	4.59919e-40	up	-0.408768	1.7511e-06	3.76643e-06	false	1.02686	8.59408e-19	3.6163e-18	up	0.157142	0.108108	0.142845	false	1.42521	9.27615e-49	6.01724e-47	up	-0.574634	8.56594e-08	5.40374e-07	false	1A
TraesCS1A02G173500	3.72	4.7	4.69	5.4	6.22	6.3	1.81	2.54	2.25	3.62	3.47	3.17	347	416	422	502	543	557	152	229	199	328	317	290	0.800718	2.03303e-07	6.6241e-07	false	0.774534	1.80446e-06	3.87617e-06	false	-0.0957824	0.52326	0.569964	false	1.62039	6.32531e-23	4.43882e-22	up	-0.881207	1.02917e-07	5.78473e-07	false	-0.854794	6.29188e-10	4.84598e-09	false	1A
TraesCS1A02G173700	4.14	4.36	4.04	1.47	1.49	1.28	4.04	3.36	3.19	0.5	0.74	0.98	398	397	374	141	134	117	350	313	291	47	70	92	-1.2101	5.40649e-11	2.34483e-10	down	-2.11354	3.82648e-23	1.79793e-22	down	-2.23785	4.71603e-26	2.66801e-25	down	-1.13675	2.04e-09	6.18497e-09	down	-0.135307	0.325916	0.443336	false	-0.985626	0.000333906	0.00131296	false	1A
TraesCS1A02G173800	6.03	6.16	6.75	1.89	1.08	1.49	4.26	4.67	4.5	0.31	0.58	0.37	461	446	497	144	77	108	293	345	326	23	43	28	-1.72496	3.47748e-15	1.99899e-14	down	-3.27572	3.52743e-46	2.78643e-45	down	-3.65432	1.28267e-58	1.51433e-57	down	-1.3981	2.40742e-10	7.84897e-10	down	-0.38875	0.00231715	0.00657863	false	-1.88445	5.10794e-08	3.29398e-07	down	1A
TraesCS1A02G174900	2.8	2.36	1.94	1.27	2.22	1.89	0.18	0.25	0.26	0	0	0	69	55	46	31	51	44	4	6	6	0	0	0	-0.0635805	0.867727	0.895094	false	NA	NA	NA	NA	-8.0172	2.20418e-10	5.78071e-10	down	3.12983	9.70601e-08	2.59869e-07	up	-3.25324	4.67628e-10	3.28954e-09	down	-7.91374	6.17482e-10	4.7571e-09	down	1A
TraesCS1A02G175000	1.39	1.32	1.31	0.54	0.46	0.53	1.1	1.07	1.09	0.73	0.68	1	225	202	205	87	70	81	160	168	168	115	108	159	-1.04038	9.10262e-06	2.51843e-05	down	-0.296195	0.146946	0.182714	false	-0.479338	0.0215572	0.0300424	false	-0.908385	0.000102889	0.000211286	false	-0.193658	0.250044	0.36047	false	0.603716	0.0193229	0.0492011	false	1A
TraesCS1A02G175200	56.27	52.54	61.13	224.43	196.02	259.33	84.95	89.07	75.62	153.22	176.31	145.19	1868	1652	1955	7414	6082	8156	2540	2860	2379	4933	5720	4720	2.35334	5.31093e-74	1.71801e-72	up	1.06426	2.87649e-44	2.19238e-43	up	1.73678	1.22982e-78	1.97355e-77	up	1.62941	2.34851e-43	3.26784e-42	up	0.662	3.2043e-13	3.12008e-12	false	-0.57298	5.92097e-07	3.45259e-06	false	1A
TraesCS1A02G175500	0.15	0	0.16	36.4	24.01	28.8	0.18	0.11	0.15	57.64	54.4	53	15	0	15	3615	2240	2723	16	11	14	5579	5306	5180	8.53181	4.62314e-14	2.4693e-13	up	8.69567	5.28618e-305	3.08784e-303	up	9.31713	2.10231e-17	8.26162e-17	up	7.85897	4.87243e-185	5.78001e-183	up	NA	NA	NA	NA	0.828709	2.56933e-10	2.06174e-09	false	1A
TraesCS1A02G176700	2.3	2.09	2.53	6.6	6.31	4.77	2.44	2.57	2.77	5.89	4.68	5.64	411	354	435	1174	1055	808	393	445	470	1021	817	988	1.70418	2.52711e-27	2.55201e-26	up	1.19424	8.69301e-28	4.64728e-27	up	1.48328	4.73628e-31	3.14088e-30	up	1.3649	1.51044e-21	9.90587e-21	up	0.278456	0.031922	0.0658428	false	-0.179323	0.193223	0.319429	false	1A
TraesCS1A02G176900	1.15	0.98	0.94	1.3	1.58	0.81	2.1	2.45	2.99	10.72	11.14	11.81	111	90	88	125	143	74	183	229	274	1007	1054	1120	0.606464	0.0367818	0.058026	false	2.29699	4.9493e-84	6.459e-83	up	3.70817	7.94971e-156	3.05562e-154	up	-0.854169	0.000548467	0.00103583	false	1.40071	4.52025e-12	3.92572e-11	up	3.14199	1.49789e-75	2.43024e-73	up	1A
TraesCS1A02G177000	1.31	1.81	2.35	3.01	1.62	2.69	3.09	3.01	3.64	2.96	3.53	3.14	105	138	182	241	122	205	224	234	277	231	277	247	0.785424	0.00566487	0.0105309	false	0.120874	0.434692	0.486335	false	1.07278	5.02137e-07	1.07218e-06	up	-0.217883	0.348567	0.407305	false	0.941238	4.21019e-06	1.94144e-05	false	0.332446	0.138001	0.24727	false	1A
TraesCS1A02G177100	3.09	2.42	2.57	6.6	5.27	3.39	2.55	2.77	2.19	1.76	1.83	2.11	242	180	194	515	386	252	180	210	163	134	140	162	1.26995	3.77146e-08	1.31057e-07	up	-0.261853	0.163104	0.200927	false	-0.250023	0.210266	0.249807	false	1.20686	6.09251e-08	1.65448e-07	up	0.00144234	0.993651	0.995882	false	-1.47716	2.47521e-11	2.20255e-10	down	1A
TraesCS1A02G177600	0.99	1.18	1	2	2.63	2.24	0.66	0.94	0.75	1.8	1.75	1.9	171	192	165	342	423	365	103	157	123	300	294	321	1.4633	2.72048e-16	1.6619e-15	up	1.34092	8.86268e-15	3.04739e-14	up	1.04002	2.91551e-10	7.58224e-10	up	1.71384	1.78504e-19	1.05107e-18	up	-0.312004	0.123358	0.204676	false	-0.382348	0.0113264	0.0310807	false	1A
TraesCS1A02G177800	2.85	3.21	2.29	19.42	17.29	16.49	3.28	3.14	2.99	7.17	7.25	7.1	277	295	214	1875	1568	1516	287	295	275	675	688	675	3.02509	3.02849e-93	1.3514e-91	up	1.33067	2.29043e-33	1.40334e-32	up	1.6225	7.71012e-32	5.23092e-31	up	2.68185	7.88906e-102	3.37911e-100	up	0.281271	0.0746355	0.134951	false	-1.35955	4.37531e-35	1.90744e-33	down	1A
TraesCS1A02G178100	0.6	0.42	0.62	2.27	2.8	1.89	0.51	0.83	0.79	4.02	3.47	3.51	129	85	128	485	562	384	98	173	161	838	729	740	2.42937	7.60613e-32	8.9897e-31	up	2.50382	3.71752e-62	3.74832e-61	up	3.00255	4.85151e-79	7.8267e-78	up	1.88164	1.5284e-20	9.53767e-20	up	0.48741	0.0452253	0.0886623	false	0.613451	1.95567e-05	9.41723e-05	false	1A
TraesCS1A02G178400	0.14	0.29	0.14	0.16	0.14	0.26	0.16	0.13	0.23	0.7	0.59	0.79	14	27	13	16	13	24	14	12	22	67	57	77	NA	NA	NA	NA	2.14794	4.40772e-08	1.05412e-07	up	2.14155	1.74647e-07	3.84134e-07	up	NA	NA	NA	NA	NA	NA	NA	NA	1.84235	5.509e-06	2.85913e-05	up	1A
TraesCS1A02G178700	64.43	57.54	55.77	29.45	25.33	29.73	83.56	73.61	71.93	16.51	15.41	16.74	1018	861	849	463	374	445	1189	1125	1077	253	238	259	-0.719623	9.39165e-07	2.87575e-06	false	-2.09731	1.2097e-85	1.60647e-84	down	-1.61431	3.0423e-37	2.36229e-36	down	-1.25405	8.37953e-22	5.57018e-21	down	0.472416	2.66543e-06	1.26347e-05	false	-0.851561	2.84613e-08	1.88411e-07	false	1A
TraesCS1A02G179400	1.76	1.03	1.83	5.64	3.69	5.13	2.28	2.38	2.7	3.97	5.19	5.58	49	27	49	156	96	135	57	64	71	107	141	152	2.00098	9.85268e-10	3.88474e-09	up	1.14069	2.98322e-06	6.30853e-06	up	1.92538	8.63655e-11	2.32822e-10	up	1.1647	2.8993e-05	6.28484e-05	up	0.774868	0.0181356	0.0404508	false	-0.0310401	0.899733	0.939567	false	1A
TraesCS1A02G179500	9.89	11.95	9.31	2.87	2.24	2.77	11.08	9.25	11	2.44	1.74	2.49	430	492	390	124	91	114	434	389	453	103	74	106	-1.62716	7.04296e-16	4.20881e-15	down	-2.09285	5.49748e-34	3.41247e-33	down	-1.96574	3.11824e-25	1.71485e-24	down	-1.80558	4.87484e-22	3.27707e-21	down	0.116146	0.387819	0.506909	false	-0.295482	0.253765	0.39256	false	1A
TraesCS1A02G179600	17.08	19.9	18.87	15.86	21.49	19.1	11	10.11	10.39	12	11.74	12.64	1599	1765	1702	1478	1881	1694	928	916	922	1090	1074	1159	0.361643	0.00281178	0.00552988	false	0.345129	1.76432e-05	3.51756e-05	false	-0.362053	6.87106e-05	0.000124761	false	1.01838	3.43992e-19	1.99133e-18	up	-0.717918	1.02518e-15	1.26219e-14	false	-0.682963	6.68769e-10	5.13214e-09	false	1A
TraesCS1A02G179700	7.14	8.24	6.98	2.18	2.72	1.95	7.11	6.1	7.32	2.06	2.42	2.8	856	936	806	260	305	222	768	707	832	240	284	329	-1.35848	1.85481e-18	1.26869e-17	down	-1.35572	7.06123e-27	3.68348e-26	down	-1.36061	1.48434e-23	7.67494e-23	down	-1.40407	3.92308e-21	2.5217e-20	down	-0.0154645	0.885715	0.922055	false	0.0389326	0.828515	0.893337	false	1A
TraesCS1A02G180000	9.37	5.84	9.95	2.82	1	2.92	19.54	23.5	21.68	2.56	2.24	2.24	261	154	267	78	26	77	490	633	572	69	61	61	-1.53911	8.50282e-06	2.35878e-05	down	-3.06553	4.48018e-75	5.28163e-74	down	-1.58729	4.85116e-10	1.24524e-09	down	-3.06859	3.5121e-11	1.22538e-10	down	1.4678	8.99138e-18	1.31805e-16	up	-0.00193143	0.995948	0.997473	false	1A
TraesCS1A02G180100	7.41	8.11	8.65	4.7	3.09	3.2	9.28	7.58	9.72	5.11	4.81	5.06	320	332	360	202	125	131	361	317	398	214	203	214	-0.777579	0.000350175	0.000794348	false	-0.689704	3.13201e-06	6.61167e-06	false	-0.43499	0.00567077	0.00850749	false	-1.08352	1.73185e-07	4.54235e-07	down	0.244102	0.0858181	0.151688	false	0.386316	0.0717616	0.146459	false	1A
TraesCS1A02G180400	1.26	1.12	0.9	2.52	2.51	2.32	1.62	1.68	1.33	1.99	2.04	2.44	116	98	80	231	216	203	135	150	116	178	184	220	1.51317	1.49619e-11	6.75301e-11	up	0.617759	0.00115105	0.00193589	false	1.23367	1.47867e-08	3.47248e-08	up	0.846019	2.60326e-05	5.66839e-05	false	0.605501	0.00718794	0.0179767	false	-0.237134	0.19058	0.316295	false	1A
TraesCS1A02G180800	15.52	13.86	14.1	3.8	4.29	4.19	14.27	15.67	15.57	1.89	3.45	2.18	1076	910	942	262	278	275	891	1051	1023	127	234	148	-1.47697	9.81682e-26	9.301e-25	down	-2.45949	2.45656e-21	1.08856e-20	down	-2.27643	8.35266e-40	6.88897e-39	down	-1.71111	4.91281e-41	6.4087e-40	down	0.173079	0.073894	0.13382	false	-0.757045	0.000459867	0.0017579	false	1A
TraesCS1A02G181000	1.54	1.5	1.99	222.42	192.52	182.05	4.74	3.96	4.61	307.81	299.35	313.48	115	106	143	16482	13400	12843	318	285	325	22230	21785	22860	7.24082	0	0	up	6.25206	0	0	up	7.76829	0	0	up	5.67327	0	0	up	1.50627	1.2768e-17	1.84821e-16	up	0.569878	1.21831e-09	9.08801e-09	false	1A
TraesCS1A02G181100	3.13	2.74	3.13	1.38	0.93	1.33	1.64	2.34	2.01	1.01	1.14	0.77	112	93	108	49	31	45	53	81	68	35	40	27	-0.954423	0.00350255	0.00677778	false	-0.899649	0.00771405	0.0117613	false	-1.36927	1.2379e-05	2.39408e-05	down	-0.536183	0.129369	0.168116	false	-0.479383	0.0598572	0.112397	false	-0.370764	0.353253	0.500628	false	1A
TraesCS1A02G181600	2.09	3.03	2.86	0.29	0.2	0.23	2.19	1.27	1.35	0.58	0.55	0.61	144	198	190	20	13	15	136	85	88	39	37	41	-3.10539	5.08626e-19	3.57212e-18	down	-1.32787	1.51747e-05	3.03994e-05	down	-1.94012	6.69695e-13	2.05907e-12	down	-2.54446	9.31453e-11	3.13462e-10	down	-0.624241	0.00900267	0.021925	false	NA	NA	NA	NA	1A
TraesCS1A02G182100	3.5	3.36	3.73	1.71	1.36	1.2	2.58	3.81	3.93	1.64	1.97	1.49	187	170	192	91	68	61	124	197	199	85	103	78	-0.953189	0.000190238	0.000447655	false	-0.879744	0.000134481	0.000248542	false	-0.798	0.000323319	0.000552499	false	-1.08577	4.23409e-05	9.04432e-05	down	0.0718872	0.715059	0.796087	false	0.19837	0.483828	0.626254	false	1A
TraesCS1A02G182300	8.07	6.13	6.1	3.8	3.61	4.05	10.09	8.53	8.56	11.68	11.51	10.91	757	545	552	355	317	360	853	774	761	1063	1056	1003	-0.474374	0.00467032	0.00882831	false	0.466032	3.09424e-07	7.00715e-07	false	1.00182	7.16677e-16	2.61189e-15	up	-1.06171	8.91462e-15	3.95563e-14	down	0.525743	3.96194e-05	0.000158715	false	1.51914	1.27155e-36	5.97681e-35	up	1A
TraesCS1A02G182400	1.86	1.59	1.29	1.9	2.5	1.95	2.67	2.28	2.27	5.01	4.77	4.59	158	128	106	161	199	157	205	188	183	414	397	383	0.766856	0.00102873	0.00217983	false	1.13153	1.13451e-15	4.06649e-15	up	1.85641	8.30973e-27	4.81884e-26	up	-0.00909003	0.963612	0.970643	false	0.714874	0.000275963	0.000955513	false	1.13066	6.98465e-12	6.57047e-11	up	1A
TraesCS1A02G182700	5.66	4.87	5.42	12.29	13.21	14.42	4.77	4.4	3.75	11.04	12.36	10.55	487	397	449	1052	1062	1175	370	366	306	921	1039	889	1.67186	2.27453e-35	3.0148e-34	up	1.53094	5.5453e-42	4.05545e-41	up	1.34392	5.64561e-30	3.62429e-29	up	1.80772	1.65162e-42	2.24117e-41	up	-0.197286	0.151115	0.241256	false	-0.28556	0.0112079	0.0307909	false	1A
TraesCS1A02G182800	1.16	0.84	1.33	0.55	1.01	0.78	1.19	1.14	1.49	1.77	1.67	1.47	79	54	87	37	64	50	73	75	96	117	111	98	-0.177846	0.619917	0.68111	false	0.500934	0.037105	0.0513004	false	0.81556	0.00265175	0.00413209	false	-0.541631	0.0966374	0.128965	false	0.304409	0.269072	0.381825	false	1.03275	0.000447607	0.00171459	up	1A
TraesCS1A02G183000	0.59	0.39	0.61	9	10.11	8.12	0.96	0.82	0.71	13.67	13.64	13.81	65	40	64	981	1035	843	95	87	74	1453	1461	1482	4.44625	1.91032e-123	1.33465e-121	up	4.18235	6.94705e-251	3.07817e-249	up	4.94884	1.08939e-229	7.54568e-228	up	3.62825	1.00678e-111	4.98768e-110	up	0.758672	0.00828981	0.0203964	false	0.544012	1.90238e-07	1.16409e-06	false	1A
TraesCS1A02G183400	13.1	8.46	11.15	6.13	3.91	4.57	16.47	14.85	15.05	3.33	3.11	3.05	1427	873	1171	665	398	472	1616	1565	1554	352	331	325	-0.806372	3.62914e-05	9.36858e-05	false	-2.15162	5.24698e-122	9.82203e-121	down	-1.53365	1.69463e-24	9.0808e-24	down	-1.47592	1.30007e-21	8.55846e-21	down	0.607878	1.5976e-06	7.80773e-06	false	-0.68295	9.44253e-05	0.000409308	false	1A
TraesCS1A02G183800	18.61	20.87	17.41	52.1	68.47	55.97	15.95	15.86	17.11	76.7	71.7	78.54	3843	4083	3465	10707	13217	10950	2966	3169	3349	15363	14471	15884	1.9798	5.6831e-73	1.79608e-71	up	2.35111	0	0	up	2.2522	6.94392e-195	3.7118e-193	up	2.02843	1.15592e-100	4.8721e-99	up	-0.109659	0.165043	0.259283	false	0.313112	0.000766245	0.00280443	false	1A
TraesCS1A02G184600	4.99	5.96	4.1	2.31	2.88	2.28	2.61	3.27	2.99	1.96	1.92	2.22	502	568	398	231	271	217	237	318	285	191	189	219	-0.663827	0.000247016	0.000571763	false	-0.403965	0.0111082	0.0165747	false	-1.04588	2.90893e-10	7.56544e-10	down	-0.0725428	0.681173	0.727043	false	-0.652635	2.26083e-05	9.39154e-05	false	-0.340834	0.0561598	0.120105	false	1A
TraesCS1A02G184900	4.92	4.33	5.49	26.83	21.55	19.93	6.24	6.33	5.53	29.18	25.75	31.47	295	246	317	1601	1208	1132	337	367	314	1697	1509	1848	2.56576	3.07141e-57	7.06915e-56	up	2.39261	1.53092e-128	3.02131e-127	up	2.80548	1.42705e-121	3.86668e-120	up	2.10175	8.72334e-48	1.35057e-46	up	0.402389	0.0063763	0.0162014	false	0.282538	0.0274052	0.066237	false	1A
TraesCS1A02G185500	0.89	1.11	1.13	0.72	0.21	0.8	2	1.93	1.37	1.72	1.56	1.87	55	65	67	44	12	47	111	115	80	103	94	113	-0.486949	0.290651	0.359702	false	0.0978649	0.682634	0.723246	false	0.974991	0.000288383	0.000494882	false	-1.41737	0.000467667	0.000890151	down	0.866129	0.00107476	0.00329002	false	1.50887	8.216e-05	0.000359305	up	1A
TraesCS1A02G186100	3.16	2.42	2.44	51.92	40.46	50.18	1.87	2.97	1.78	42.81	45.16	41.99	167	121	124	2730	1998	2512	89	152	89	2194	2332	2173	4.50626	1.19036e-170	1.41681e-168	up	4.42897	1.38958e-86	1.86151e-85	up	4.27186	5.31066e-280	5.14863e-278	up	4.61035	2.16787e-159	1.95067e-157	up	-0.166502	0.496703	0.611534	false	-0.189918	0.0953075	0.184325	false	1A
TraesCS1A02G186400	0	0	0.07	2.07	2.35	2.19	0	0	0	2.96	2.47	2.72	0	0	3	91	97	92	0	0	0	127	107	118	6.90957	1.78511e-14	9.78331e-14	up	9.39841	8.15527e-15	2.8082e-14	up	7.12124	7.45558e-16	2.71454e-15	up	9.13675	8.74643e-14	3.64157e-13	up	NA	NA	NA	NA	0.252589	0.286733	0.430145	false	1A
TraesCS1A02G186500	2.4	1.55	2.33	4.48	2.85	3.48	2.96	3.43	3.76	8.13	8.87	7.68	126	77	118	234	140	173	140	174	187	414	455	395	1.1388	2.37883e-05	6.27062e-05	up	1.41891	7.4225e-22	3.34475e-21	up	2.22603	5.66907e-33	3.96321e-32	up	0.280571	0.219817	0.27062	false	0.796833	0.000323519	0.00110542	false	1.13178	1.23802e-09	9.22902e-09	up	1A
TraesCS1A02G186600	0	0	0	0	0	0	0	0	0.13	1.24	1.15	1.54	0	0	0	0	0	0	0	0	5	50	47	63	NA	NA	NA	NA	5.08438	5.53828e-11	1.5704e-10	up	8.42616	1.8719e-11	5.26366e-11	up	NA	NA	NA	NA	NA	NA	NA	NA	8.1011	1.26423e-10	1.04623e-09	up	1A
TraesCS1A02G186700	8.91	8.84	9.6	3.92	3.4	2.95	7.34	6.41	6.33	6.07	6.39	6.75	395	371	410	173	141	124	293	275	266	261	277	293	-1.05907	3.11895e-08	1.09153e-07	down	0.0742108	0.602945	0.648974	false	-0.254165	0.0761285	0.0979126	false	-0.781849	5.90634e-05	0.000124455	false	-0.339006	0.0130955	0.030469	false	0.847373	5.7073e-06	2.95882e-05	false	1A
TraesCS1A02G186800	12.52	10.4	14.22	38.98	29.84	34.39	9.14	9.9	9.18	36.92	38.18	34.97	540	425	591	1673	1203	1405	355	413	375	1544	1609	1477	1.82827	1.39442e-30	1.57885e-29	up	2.10046	1.98288e-123	3.7495e-122	up	1.82066	2.66657e-54	2.92631e-53	up	2.05706	1.60757e-50	2.65973e-49	up	-0.290372	0.0359063	0.072809	false	0.035966	0.763452	0.849023	false	1A
TraesCS1A02G187000	0.3	0.17	0.18	2.97	1.58	2.2	0.24	0.33	0.33	8.84	7.76	6.16	15	8	9	150	75	106	11	16	16	435	385	306	3.74257	3.19743e-18	2.16298e-17	up	4.79449	2.72013e-65	2.84912e-64	up	5.38664	3.26179e-64	4.22354e-63	up	3.09871	4.04332e-15	1.83583e-14	up	NA	NA	NA	NA	1.69057	1.08686e-13	1.225e-12	up	1A
TraesCS1A02G187300	0.71	0.67	0.57	0.23	0.5	0.91	1.39	1.37	1.2	1.61	1.97	1.63	77	69	60	25	51	94	136	144	124	170	210	174	0.0983938	0.815238	0.851213	false	0.536249	0.00444733	0.00699081	false	1.67541	2.42723e-13	7.66134e-13	up	-1.09276	0.00243278	0.00423562	down	1.12874	9.44981e-07	4.7499e-06	up	1.61995	1.20273e-06	6.76661e-06	up	1A
TraesCS1A02G187600	0.09	0	0	0.09	0.24	0.23	2.39	2.46	1.77	6.04	7.03	5.89	5	0	0	5	12	12	117	129	91	318	373	313	NA	NA	NA	NA	1.65549	5.32067e-21	2.33207e-20	up	7.89797	6.89922e-32	4.68652e-31	up	-3.38921	7.09082e-16	3.38555e-15	down	6.23387	1.49555e-18	2.33903e-17	up	5.03537	3.14554e-52	2.5885e-50	up	1A
TraesCS1A02G187700	0.46	0.21	1.63	114.75	91.15	114.59	2.32	2.23	2.69	158.22	170.81	163.38	7	3	24	1745	1302	1659	32	33	39	2345	2551	2445	7.475	1.97739e-23	1.69824e-22	up	6.22282	0	0	up	7.99572	5.43416e-28	3.27578e-27	up	5.65216	3.10045e-182	3.60062e-180	up	NA	NA	NA	NA	0.563237	7.40636e-07	4.27206e-06	false	1A
TraesCS1A02G188500	3.1	3.07	3.34	1.5	1.53	1.92	4.08	3.7	4.13	1.15	1.15	1.22	301	283	313	145	139	177	357	348	380	108	109	116	-0.591578	0.00287684	0.00564937	false	-1.62338	2.43881e-24	1.18658e-23	down	-1.18264	7.63804e-11	2.06719e-10	down	-1.08334	1.49943e-09	4.58981e-09	down	0.430234	0.00138156	0.00413213	false	-0.548667	0.012853	0.0347209	false	1A
TraesCS1A02G188600	0.85	0.86	0.93	0.5	0.71	0.4	1.43	1.09	1.23	0.46	0.51	0.46	63	60	66	37	49	28	95	78	86	33	37	33	-0.366715	0.326535	0.397443	false	-1.25191	3.97108e-05	7.68621e-05	down	-0.628736	0.069395	0.0898315	false	-1.03974	0.00196333	0.00346135	down	0.612423	0.0196294	0.0433267	false	NA	NA	NA	NA	1A
TraesCS1A02G188700	4.26	2	2.92	24.74	22.3	22.32	3.43	3.26	3.56	15.59	14.33	14.63	264	117	174	1524	1290	1309	191	195	209	936	867	887	3.26465	6.54179e-60	1.60382e-58	up	2.25827	1.88045e-90	2.62217e-89	up	2.52965	1.96308e-15	6.98051e-15	up	2.94305	1.04701e-113	5.33493e-112	up	0.261374	0.250438	0.360921	false	-0.693059	9.2358e-11	7.74077e-10	false	1A
TraesCS1A02G188800	4.19	4.65	4.74	1.39	1.75	1.96	3.12	4.29	3.93	2.85	2.53	2.53	303	318	330	100	118	134	203	300	269	200	179	179	-1.06652	2.05959e-07	6.70731e-07	down	-0.382515	0.0255766	0.0362437	false	-0.522235	0.00145816	0.00233548	false	-0.977077	5.56364e-06	1.28952e-05	false	-0.150213	0.33994	0.457834	false	0.585798	0.00576624	0.0171453	false	1A
TraesCS1A02G189100	8.71	10.1	8.05	16.52	16.83	14.5	8.4	9.41	8.45	9.94	9.51	9.44	817	897	727	1541	1475	1288	709	853	751	904	871	867	1.18427	1.0851e-20	8.26684e-20	up	0.274606	0.00233311	0.00379343	false	0.361647	0.00089346	0.0014621	false	1.0464	2.08367e-20	1.29244e-19	up	0.0761366	0.488135	0.603534	false	-0.780548	7.25841e-14	8.32824e-13	false	1A
TraesCS1A02G189300	0.15	0	0	1.49	0.67	0.69	0.1	0.11	0.13	1.31	1.45	2.08	10	0	0	99	42	44	6	7	8	85	95	136	4.60092	0.00946677	0.0169193	up	3.99237	2.68097e-20	1.148e-19	up	5.25136	0.00203976	0.00321415	up	3.28946	1.12893e-09	3.48751e-09	up	NA	NA	NA	NA	0.696727	0.0422445	0.0948155	false	1A
TraesCS1A02G189400	0.55	0.65	0.72	0.67	1.14	0.36	0.5	0.49	0.8	1.04	1.31	0.88	34	38	43	41	66	21	28	29	47	62	79	53	0.511138	0.261472	0.32862	false	0.983683	0.0047798	0.00748739	false	1.00062	0.00372362	0.00570811	up	0.445912	0.334286	0.392681	false	0.00649539	0.986477	0.991138	false	0.527243	0.18394	0.307824	false	1A
TraesCS1A02G189600	1.57	1.79	1.93	2.51	3.08	2.83	1.59	1.34	1.55	4.11	4.28	4.75	127	137	150	202	233	217	116	105	119	322	338	376	1.02062	7.69507e-07	2.37672e-06	up	1.68741	4.25343e-25	2.11378e-24	up	1.56919	2.63121e-20	1.18692e-19	up	1.08831	8.23521e-08	2.21643e-07	up	-0.128754	0.535806	0.646701	false	0.589763	0.000236909	0.000957867	false	1A
TraesCS1A02G190000	0.36	0.4	0.42	0.07	0.12	0.12	0.51	0.34	0.53	0.14	0.18	0.08	50	53	56	10	16	16	64	46	70	19	25	11	-1.55438	0.00104955	0.00222091	down	-1.63103	7.8555e-05	0.000148077	down	-1.28426	0.00348998	0.00536765	down	-1.95126	1.429e-05	3.19081e-05	down	0.336006	0.275519	0.389154	false	NA	NA	NA	NA	1A
TraesCS1A02G190200	0.28	0.28	0.36	0.35	0.16	0.23	0.43	0.44	0.4	0.5	0.6	0.47	29	28	36	36	16	23	40	44	39	50	61	48	NA	NA	NA	NA	0.45188	0.171555	0.210461	false	1.02009	0.00613801	0.00917252	up	-0.562681	0.211529	0.261488	false	0.557676	0.130872	0.214855	false	1.00786	0.0148975	0.0393742	up	1A
TraesCS1A02G190500	4.24	3.27	3.61	8.2	7.16	8.95	2.64	2.72	3.16	7.18	7.64	8.08	360	263	295	693	568	720	202	223	254	591	634	672	1.48061	9.06027e-19	6.2846e-18	up	1.56449	1.00859e-36	6.63787e-36	up	1.29569	5.47943e-21	2.55424e-20	up	1.69825	1.10239e-27	9.45967e-27	up	-0.278942	0.0837086	0.148556	false	-0.141446	0.280267	0.422825	false	1A
TraesCS1A02G190800	14.52	18.67	17.28	29.37	37.11	34.77	15.37	16.77	13.79	41.93	45.55	39.58	1025	1248	1175	2063	2448	2325	977	1145	922	2870	3142	2736	1.35261	6.40502e-28	6.61639e-27	up	1.60495	5.99983e-87	8.0665e-86	up	1.58914	3.08383e-59	3.68076e-58	up	1.31781	1.76253e-31	1.74151e-30	up	-0.026847	0.807422	0.866061	false	0.277857	0.00552343	0.0165214	false	1A
TraesCS1A02G190900	0.73	1.05	0.93	1.86	1.3	1.52	0.89	0.91	0.72	2.4	2.26	2.67	74	100	90	186	122	145	81	89	69	234	222	263	1.14547	1.67237e-05	4.48773e-05	up	1.66956	1.32307e-17	5.14393e-17	up	1.69089	3.27229e-16	1.21135e-15	up	1.07258	3.03492e-05	6.56851e-05	up	0.0101445	0.968561	0.979133	false	0.589026	0.00352327	0.0110807	false	1A
TraesCS1A02G191000	1.02	0.7	1.11	0.43	0.64	0.44	1.09	0.4	0.53	0.27	0.26	0.44	61	40	64	26	36	25	59	23	30	16	15	26	-0.558598	0.179279	0.236975	false	NA	NA	NA	NA	-1.28656	0.00321827	0.00496821	down	NA	NA	NA	NA	-0.389969	0.325032	0.442552	false	NA	NA	NA	NA	1A
TraesCS1A02G191400	9.75	10.34	11.6	19.87	22.89	20.4	12.91	14.16	13.28	26.15	25.69	25.94	457	459	524	927	1003	906	545	642	590	1189	1177	1191	1.34306	2.20767e-24	1.97683e-23	up	1.08367	6.74378e-37	4.45453e-36	up	1.55115	1.69284e-48	1.6613e-47	up	0.825311	8.17544e-13	3.1947e-12	false	0.456648	9.86656e-05	0.000369635	false	0.24938	0.012925	0.0348836	false	1A
TraesCS1A02G191700	13.4	11.86	12.96	5.71	4.73	4.75	9.29	9.64	9.88	4.65	4.35	4.84	724	607	675	307	239	243	452	504	506	244	230	256	-0.978429	1.63624e-09	6.33591e-09	false	-0.919789	2.39026e-13	7.67705e-13	false	-1.21041	1.83696e-19	7.98013e-19	down	-0.73879	2.01573e-06	4.84772e-06	false	-0.301014	0.00702279	0.0176063	false	-0.189106	0.269238	0.410432	false	1A
TraesCS1A02G191800	28.21	19.53	26.65	16.57	14.06	16.49	39.6	41.64	39.1	6.88	7.08	7.72	1855	1216	1688	1084	864	1027	2345	2648	2436	439	455	497	-0.307607	0.0497688	0.0760568	false	-2.33526	7.61879e-194	2.40542e-192	down	-1.52585	2.13767e-29	1.34898e-28	down	-1.16828	8.14391e-26	6.47939e-25	down	0.79937	3.2628e-12	2.87866e-11	false	-1.1751	1.57209e-20	3.2424e-19	down	1A
TraesCS1A02G192600	10.11	11.04	12.12	4.26	4.79	4.89	11.41	11.33	10.39	6.03	6.2	5.73	382	395	441	160	169	175	388	414	372	221	229	212	-0.906759	4.00176e-07	1.27056e-06	false	-0.745388	4.4812e-08	1.07092e-07	false	-0.633176	3.08266e-05	5.76391e-05	false	-1.06968	1.07104e-10	3.58868e-10	down	0.101521	0.43246	0.550854	false	0.315378	0.0814434	0.162442	false	1A
TraesCS1A02G192800	7.73	9.39	7.72	2.37	2.03	3.09	6.25	6.92	6.68	1.87	1.81	1.59	571	657	550	174	140	216	416	495	468	134	131	115	-1.37607	5.32519e-13	2.66016e-12	down	-1.77634	6.98597e-33	4.23074e-32	down	-1.97904	8.75894e-36	6.57234e-35	down	-1.22476	2.13126e-11	7.55804e-11	down	-0.213428	0.0773278	0.138957	false	-0.559433	0.0129664	0.0349677	false	1A
TraesCS1A02G193000	9.57	9.02	9.34	11.11	13.06	13.96	10.39	10.55	9.74	16.15	15.99	15.68	769	687	723	889	981	1063	752	820	742	1259	1256	1234	0.797126	7.74416e-10	3.0764e-09	false	0.777588	4.46598e-22	2.02671e-21	false	1.03066	1.71553e-27	1.01802e-26	up	0.49323	3.58737e-05	7.71197e-05	false	0.242533	0.0149489	0.0341938	false	0.275399	0.0111561	0.0306679	false	1A
TraesCS1A02G193900	3.48	2.51	2.84	1.55	2.08	1.46	5.19	5.57	3.01	2.12	3.2	3.6	88	60	69	39	49	35	118	136	72	52	79	89	-0.452296	0.203357	0.264396	false	-0.48918	0.0938301	0.121029	false	0.267629	0.386349	0.434315	false	-1.26004	0.000155991	0.000313795	down	0.74637	0.00753412	0.0187319	false	0.760882	0.0260725	0.0634832	false	1A
TraesCS1A02G194000	15.94	10.74	17.81	25.84	16.27	23.04	22.02	22.64	22.02	34.06	34.3	30.63	693	442	746	1118	661	949	862	952	907	1436	1457	1304	0.906693	9.24142e-06	2.55503e-05	false	0.707342	8.07819e-19	3.28347e-18	false	1.4062	6.56606e-22	3.17705e-21	up	0.156415	0.325592	0.383662	false	0.688627	2.20363e-06	1.05756e-05	false	0.544084	0.000316414	0.00124994	false	1A
TraesCS1A02G194200	0	0	0	0.22	0.08	0.06	0.02	0	0	0.84	0.87	0.7	0	0	0	12	4	3	1	0	0	45	47	38	NA	NA	NA	NA	6.99978	2.82788e-08	6.84198e-08	up	8.12777	1.55477e-10	4.11873e-10	up	NA	NA	NA	NA	NA	NA	NA	NA	2.7011	3.32919e-06	1.77891e-05	up	1A
TraesCS1A02G194500	3.91	2.06	3.31	6.42	5.05	3.82	4.45	4.09	3.42	6	5.51	4.87	82	41	67	134	99	76	84	83	68	122	113	100	1.06915	0.00134197	0.00278831	up	0.591669	0.0139083	0.0204792	false	1.06876	0.000232915	0.000403528	up	0.540972	0.0610462	0.0847993	false	0.467128	0.116322	0.195057	false	0.0421976	0.871911	0.922246	false	1A
TraesCS1A02G194600	1.01	1.06	2.05	3.26	3.07	3.03	1.62	1.12	1.18	2.58	2.56	2.25	27	27	53	87	77	77	39	29	30	67	67	59	1.53485	3.36177e-05	8.71648e-05	up	1.05548	0.00158564	0.00262575	up	1.09555	0.00329485	0.0050814	up	1.44437	1.78441e-05	3.95027e-05	up	0.0296679	0.943231	0.962247	false	-0.397356	0.156755	0.272462	false	1A
TraesCS1A02G194900	4.79	5.56	5.14	20.6	19.25	18.56	7.36	6.42	6.45	15.41	17.07	16.68	376	413	389	1609	1412	1380	520	487	480	1173	1309	1282	2.2678	3.0245e-70	9.10527e-69	up	1.41952	1.04579e-53	9.33837e-53	up	1.92237	1.28005e-72	1.87433e-71	up	1.71368	1.78468e-48	2.80892e-47	up	0.49232	6.65029e-05	0.000256282	false	-0.302774	0.00302217	0.0096828	false	1A
TraesCS1A02G195200	15.96	13.67	15.38	4.35	5.49	4.3	12.49	13.73	14.71	5.64	5.34	6.17	1481	1202	1375	402	476	378	1044	1233	1294	508	484	561	-1.32592	6.76055e-22	5.43977e-21	down	-1.11804	6.83107e-31	3.94199e-30	down	-1.13777	1.34274e-24	7.2244e-24	down	-1.3563	2.17077e-26	1.77046e-25	down	-0.0299992	0.761599	0.83194	false	0.228914	0.100491	0.192138	false	1A
TraesCS1A02G195500	5.41	3.78	4.34	5.17	3.76	5.27	18.33	16.87	17.96	6.02	6.56	6.89	351	232	271	334	228	324	1071	1059	1104	379	416	438	0.425475	0.0439964	0.068117	false	-1.31071	1.16328e-42	8.60557e-42	down	0.779055	1.38781e-06	2.88096e-06	false	-1.71639	2.05107e-30	1.95628e-29	down	2.07956	2.90013e-60	2.60393e-58	up	0.397944	0.0186545	0.0477354	false	1A
TraesCS1A02G195700	0.7	1.03	1.06	2.52	2.63	2.53	0.57	0.68	0.8	1.77	1.86	1.36	109	151	158	388	381	371	79	102	117	266	281	206	1.81179	1.39921e-20	1.05984e-19	up	1.42248	1.1312e-12	3.51488e-12	up	1.09459	1.64394e-07	3.62328e-07	up	2.08881	4.00275e-29	3.6389e-28	up	-0.3391	0.149946	0.239785	false	-0.67506	3.37971e-05	0.000157345	false	1A
TraesCS1A02G196100	0.31	0.23	0.42	0.14	0.11	0.09	0.25	0.36	0.31	0.15	0.21	0.18	46	32	60	21	15	13	33	52	43	21	30	26	-1.1289	0.0233955	0.038548	down	-0.647842	0.105082	0.134271	false	-0.595738	0.164025	0.198727	false	-1.2316	0.00926526	0.0148579	down	0.042341	0.906704	0.937336	false	NA	NA	NA	NA	1A
TraesCS1A02G196300	8.71	9.97	9.86	15.12	15.3	18.09	8.87	8.17	8.23	17.27	16.79	16.71	603	654	658	1042	990	1187	553	547	540	1160	1136	1133	1.11722	7.75492e-17	4.88654e-16	up	1.1448	7.06012e-40	4.96013e-39	up	1.08706	2.62496e-27	1.54847e-26	up	1.12385	1.0592e-19	6.31888e-19	up	-0.0684268	0.533845	0.644999	false	0.0123545	0.910412	0.946184	false	1A
TraesCS1A02G196500	77.21	83.06	79.94	39.97	40.91	36.8	72.73	64.38	71.44	21.95	24.7	23.16	5380	5481	5366	2771	2664	2429	4564	4339	4717	1483	1682	1580	-0.679057	2.89012e-12	1.37453e-11	false	-1.44108	1.1014e-108	1.84984e-107	down	-1.52713	7.26016e-91	1.38047e-89	down	-0.643846	1.20326e-12	4.64753e-12	false	-0.0966136	0.166721	0.261452	false	-0.805878	6.749e-18	1.12965e-16	false	1A
TraesCS1A02G196600	2.55	2.93	3.14	7.4	7.93	9.03	3.32	3.16	3.01	9.52	9.45	7.34	168	183	199	485	488	563	197	201	188	608	608	473	1.84897	1.46532e-27	1.49381e-26	up	1.60865	3.08921e-30	1.753e-29	up	1.86568	1.95136e-32	1.34564e-31	up	1.54111	5.42479e-23	3.81747e-22	up	0.246231	0.153462	0.24415	false	0.0589576	0.683381	0.789329	false	1A
TraesCS1A02G197100	0.54	0.15	0.22	0.47	0.82	0.81	0.37	0.3	0.36	0.53	0.55	0.8	52	14	20	45	74	74	32	28	33	49	52	75	1.54212	0.000980041	0.00208264	up	0.999194	0.00468995	0.00735243	false	1.28757	0.0044951	0.00682629	up	1.20321	0.00134603	0.00242162	up	NA	NA	NA	NA	-0.213944	0.524429	0.661268	false	1A
TraesCS1A02G197200	14.19	16.8	15.89	36.36	43.68	36.17	11.93	11.26	11.54	20.35	18.77	22.82	1280	1435	1381	3263	3682	3090	969	982	986	1780	1654	2015	1.65729	4.67959e-51	9.39036e-50	up	0.972223	1.14039e-32	6.87694e-32	false	0.657781	1.99731e-11	5.60621e-11	false	1.92127	8.95574e-87	3.04049e-85	up	-0.325205	0.000380291	0.0012798	false	-0.958514	4.22365e-21	9.07839e-20	false	1A
TraesCS1A02G197300	10.82	9.67	11.04	15.24	13.4	17.1	10.09	8.91	9.72	16.44	18.09	17.89	418	354	411	586	484	626	351	333	356	616	683	677	0.889348	3.11835e-08	1.09139e-07	false	1.00626	7.10844e-20	3.00395e-19	up	0.987488	1.07552e-15	3.87927e-15	false	0.856689	1.18552e-08	3.4011e-08	false	-0.0290202	0.825933	0.879796	false	0.14148	0.289578	0.433154	false	1A
TraesCS1A02G197500	4.21	5.12	3.41	3.16	3.76	2.55	5.08	5.01	4.24	7.8	5.88	7.79	183	211	143	137	153	105	199	211	175	329	250	332	-0.0783098	0.746228	0.791774	false	0.719597	1.29053e-05	2.59964e-05	false	1.01033	1.25935e-07	2.7972e-07	up	-0.419666	0.0526657	0.0740779	false	0.279701	0.139982	0.226915	false	1.12938	1.73374e-08	1.16789e-07	up	1A
TraesCS1A02G197700	0.41	0.76	0.77	0.51	0.05	0.14	0.38	0.34	0.38	0.32	0.19	0.26	38	67	69	47	4	12	32	31	34	29	17	24	-1.101	0.073665	0.108055	false	NA	NA	NA	NA	-1.06986	0.0116707	0.0168619	down	NA	NA	NA	NA	-0.691898	0.0559703	0.106203	false	NA	NA	NA	NA	1A
TraesCS1A02G197900	24.7	18.43	26.48	9.47	6.67	7.06	41.9	44.8	47.03	7.7	8.27	7.63	883	624	912	337	223	239	1349	1549	1593	267	289	267	-1.23026	1.83479e-10	7.6367e-10	down	-2.36513	1.00721e-132	2.0572e-131	down	-1.30747	6.49775e-18	2.61837e-17	down	-2.33893	4.70699e-57	9.02711e-56	down	1.04744	4.58433e-18	6.9058e-17	up	-0.0335802	0.854324	0.910593	false	1A
TraesCS1A02G198300	3.88	3.22	3.67	1.98	1.61	1.95	4.58	3.92	4.6	1.47	1.14	1.38	413	324	376	210	160	196	439	403	464	152	119	144	-0.606042	0.00151371	0.00311707	false	-1.57356	1.74046e-24	8.50273e-24	down	-1.17464	3.8859e-11	1.07107e-10	down	-1.05602	6.233e-10	1.96948e-09	down	0.388347	0.00369503	0.00999116	false	-0.525607	0.011729	0.0320392	false	1A
TraesCS1A02G198500	3.65	3.2	3.77	7.61	8.86	8.16	3.89	2.45	3.92	6.89	6.44	7.04	226	188	225	469	513	479	217	147	230	414	390	427	1.55986	5.58714e-22	4.51035e-21	up	1.12947	6.9161e-12	2.06362e-11	up	1.19355	2.12424e-15	7.543e-15	up	1.44541	1.03654e-15	4.90011e-15	up	0.0539934	0.781553	0.847013	false	-0.324945	0.0130649	0.0352034	false	1A
TraesCS1A02G198700	0.62	0.51	0.59	0.32	0.4	0.28	1.19	1.4	1.21	0.92	0.8	0.88	261	204	239	134	157	112	450	570	483	376	331	364	-0.439399	0.0432273	0.0670405	false	-0.405599	0.00102931	0.00174111	false	0.853729	4.981e-08	1.13386e-07	false	-1.7487	2.4879e-23	1.77858e-22	down	1.24875	8.43315e-19	1.34537e-17	up	1.33369	1.31537e-13	1.47238e-12	up	1A
TraesCS1A02G198800	1.81	1.89	2.35	7.35	7.07	5.2	2.36	1.72	1.53	2.84	4.74	3.7	75	74	94	303	274	204	88	69	60	114	192	150	2.04779	1.87858e-18	1.2842e-17	up	1.1473	7.42986e-06	1.52405e-05	up	1.15327	7.05486e-06	1.39105e-05	up	1.99109	4.44899e-17	2.28824e-16	up	-0.00452378	0.98687	0.991414	false	-0.852013	0.000103268	0.0004441	false	1A
TraesCS1A02G199000	2.98	3.6	2.75	1.53	2.03	1.3	2.37	2.35	2.06	1.15	1.27	1.38	451	517	402	231	288	187	323	345	296	169	188	205	-0.592851	0.00169761	0.00346699	false	-0.698111	5.1229e-06	1.06434e-05	false	-1.03892	1.17469e-10	3.13643e-10	down	-0.302572	0.100345	0.133473	false	-0.351641	0.0116998	0.0275905	false	-0.405497	0.0401727	0.0910457	false	1A
TraesCS1A02G199200	0.25	0.16	0.52	0.19	0.25	0.24	4.28	4.29	3.57	0.43	0.95	0.64	12	7	24	9	11	11	183	197	161	20	44	30	NA	NA	NA	NA	-2.44491	8.35045e-19	3.39159e-18	down	NA	NA	NA	NA	-3.97585	2.10185e-28	1.85526e-27	down	3.80813	9.7058e-32	3.38067e-30	up	NA	NA	NA	NA	1A
TraesCS1A02G200000	145.02	128.56	142.79	73.5	73.49	71.46	181.96	176.38	184.65	39.5	43.68	41.97	6129	5146	5814	3091	2903	2861	6926	7210	7395	1619	1804	1737	-0.580916	1.80584e-08	6.43818e-08	false	-1.97972	2.97164e-294	1.65325e-292	down	-1.4799	5.06411e-72	7.35153e-71	down	-1.1316	3.69572e-44	5.24333e-43	down	0.489531	9.11379e-12	7.66313e-11	false	-0.856646	2.99894e-22	7.01636e-21	false	1A
TraesCS1A02G200800	7.91	8.03	8.32	10.16	11.12	10.19	7.78	6.98	8	14.42	16.16	15.37	544	523	551	695	715	664	482	464	521	962	1086	1035	0.724514	2.13842e-08	7.58401e-08	false	1.15221	1.69382e-33	1.04251e-32	up	1.17704	1.94061e-29	1.22602e-28	up	0.648976	1.57542e-07	4.14747e-07	false	0.0144163	0.899459	0.932265	false	0.494381	5.13899e-06	2.68099e-05	false	1A
TraesCS1A02G201000	1.35	1.58	1.49	1.57	1.36	1.18	0.41	0.53	0.64	0.36	0.77	0.45	107	119	114	124	101	89	29	41	48	28	60	35	0.250536	0.333282	0.404383	false	0.145448	0.714421	0.751929	false	-1.22121	0.000142701	0.000251883	down	1.56524	5.92702e-07	1.48935e-06	up	-1.37577	8.543e-07	4.31805e-06	down	-1.4281	1.34242e-05	6.61766e-05	down	1A
TraesCS1A02G201300	9.65	5.68	9.95	8.32	5.11	7.5	12.8	12.83	9.37	4.01	3.08	4.19	273	152	271	234	135	201	326	351	251	110	85	116	0.0831271	0.751945	0.796823	false	-1.49748	8.01231e-15	2.75945e-14	down	-0.913305	0.000212066	0.000368961	false	-0.552751	0.0117137	0.0184823	false	0.573815	0.00462769	0.0122032	false	-0.952295	0.000101599	0.000437614	false	1A
TraesCS1A02G201400	13.49	11.36	13.14	3.83	3.33	3.23	14.27	14.57	15.35	4.25	3.97	4.04	1422	1134	1335	402	328	323	1355	1486	1533	435	409	417	-1.51795	1.9408e-25	1.81437e-24	down	-1.71204	5.4433e-86	7.24639e-85	down	-1.37723	1.76016e-33	1.24829e-32	down	-1.90354	4.84225e-54	8.70388e-53	down	0.324402	0.000551421	0.00179619	false	0.183362	0.206766	0.336391	false	1A
TraesCS1A02G201500	0.65	0.75	0.59	0.45	0.42	0.36	1.14	0.79	1.18	0.5	0.79	1.13	48	53	42	33	29	25	76	57	83	36	57	82	-0.350708	0.39623	0.468392	false	-0.226786	0.491722	0.542066	false	0.536239	0.144786	0.177317	false	-1.16487	0.00144047	0.00258142	down	0.75264	0.0125516	0.0293416	false	0.929586	0.021106	0.0530203	false	1A
TraesCS1A02G201700	4.8	4.23	3.89	14.02	11.33	16.32	3.46	3.06	3.16	9.08	11.63	9.4	274	229	214	797	605	883	178	169	171	503	649	526	2.04426	9.61645e-31	1.09556e-29	up	1.7759	9.69547e-36	6.24717e-35	up	1.47515	1.9259e-22	9.54234e-22	up	2.29302	1.11944e-41	1.48615e-40	up	-0.310845	0.0669644	0.123337	false	-0.524719	0.000738274	0.00271126	false	1A
TraesCS1A02G202700	0	0.02	0	0	0	0	2.19	2.18	1.89	1.33	1.47	2	0	1	0	0	0	0	106	113	96	69	77	105	NA	NA	NA	NA	-0.247979	0.319837	0.369743	false	8.1133	4.28257e-11	1.17716e-10	up	-9.00746	1.91752e-13	7.8243e-13	down	8.35094	5.47438e-12	4.7051e-11	up	8.75019	1.36491e-12	1.38603e-11	up	1A
TraesCS1A02G202900	0	0	0	80.81	46.55	65.1	0	0.1	0.4	99.23	104.55	85.68	0	0	0	854	462	655	0	1	4	1022	1085	891	12.172	2.8695e-24	2.55743e-23	up	9.31011	7.56498e-46	5.92872e-45	up	12.6551	1.23741e-26	7.14307e-26	up	8.7759	2.45452e-38	2.96264e-37	up	NA	NA	NA	NA	0.528431	0.00193406	0.00647749	false	1A
TraesCS1A02G203100	0.62	0.92	0.62	0.23	0.32	0.19	0.83	0.82	0.66	0.39	0.13	0.26	74	104	72	27	36	21	89	95	75	45	15	30	-1.21105	0.001518	0.00312557	down	-1.4435	6.34966e-05	0.000120738	down	-1.22608	0.00188299	0.00297962	down	-1.47817	2.85532e-05	6.19282e-05	down	0.205647	0.431772	0.550213	false	NA	NA	NA	NA	1A
TraesCS1A02G203200	0.4	0.33	0.37	11.79	10.22	11.55	0.32	0.3	0.84	6.19	5.17	4.66	18	14	16	532	433	496	13	13	36	272	229	207	5.29639	8.82444e-84	3.35454e-82	up	3.5989	1.00908e-33	6.23059e-33	up	4.1314	2.42205e-44	2.19931e-43	up	4.71271	7.41595e-68	1.79953e-66	up	NA	NA	NA	NA	-1.12223	2.29487e-12	2.27812e-11	down	1A
TraesCS1A02G203600	0	0	0	1.04	0.83	1.37	0	0.04	0.02	0.96	1.36	1.06	0	0	0	52	39	65	0	2	1	47	67	52	8.51455	1.97759e-11	8.85533e-11	up	5.87401	2.24205e-10	6.13855e-10	up	8.47948	1.31846e-11	3.74548e-11	up	5.8579	7.31059e-10	2.29588e-09	up	NA	NA	NA	NA	0.00969128	0.977693	0.986647	false	1A
TraesCS1A02G203800	5.64	3.23	4.97	15.87	10.22	12.11	0.56	0.75	0.23	0	0	0.03	179	97	152	501	303	364	16	23	7	0	0	1	1.81896	3.48277e-14	1.87274e-13	up	NA	NA	NA	NA	-8.38741	6.32839e-12	1.83225e-11	down	4.81677	1.34984e-53	2.39863e-52	up	-3.05947	5.61065e-17	7.7411e-16	down	-10.1623	2.05386e-17	3.28468e-16	down	1A
TraesCS1A02G204200	4.76	4.84	4.13	18.51	19.57	21.46	4.06	4.16	4.38	23.49	24.27	23.8	362	349	303	1402	1392	1547	278	306	316	1734	1805	1774	2.46694	6.18881e-79	2.17478e-77	up	2.64347	1.14187e-203	3.83238e-202	up	2.63728	1.30973e-149	4.68242e-148	up	2.42219	9.5717e-91	3.45839e-89	up	-0.0168048	0.903355	0.935206	false	0.212927	0.0269401	0.0652757	false	1A
TraesCS1A02G204400	0.76	0.71	0.35	0.22	0.36	0.37	0.42	0.74	0.51	0.81	0.82	0.52	52	46	23	15	23	24	26	49	33	54	55	35	-0.592919	0.239387	0.304502	false	0.502998	0.183665	0.224034	false	0.502921	0.212988	0.252829	false	NA	NA	NA	NA	-0.010777	0.978901	0.985932	false	1.13765	0.00866171	0.0245382	up	1A
TraesCS1A02G205300	7.18	7.81	7.23	11.16	13.24	11.87	7.54	6.96	6.86	14.36	14.84	14.69	664	684	644	1026	1144	1039	628	622	601	1287	1340	1330	1.05409	1.93571e-18	1.32158e-17	up	1.17654	5.24118e-46	4.12543e-45	up	1.23726	1.67419e-39	1.37281e-38	up	0.942574	7.80002e-17	3.94627e-16	false	0.0501479	0.631721	0.72958	false	0.224632	0.0236698	0.0584327	false	1A
TraesCS1A02G206100	1.02	1.34	1.69	1.32	0.93	0.76	1.29	1.49	1.47	14.41	12.37	12.76	48	60	77	62	41	34	55	68	66	660	571	590	-0.0709241	0.853589	0.883273	false	3.35112	2.14463e-95	3.15038e-94	up	3.54522	5.0074e-84	8.69816e-83	up	-0.313494	0.37493	0.434325	false	0.181343	0.543719	0.653564	false	3.65669	8.64928e-73	1.29648e-70	up	1A
TraesCS1A02G206200	1.54	0.87	1.77	2.99	2.44	2.98	0.92	1.77	1.36	2.79	3.99	3.31	80	43	89	155	119	147	43	89	67	141	203	169	1.35892	5.73012e-06	1.61649e-05	up	1.45366	1.13178e-08	2.80335e-08	up	1.52226	2.38399e-08	5.53152e-08	up	1.23942	1.30861e-05	2.9318e-05	up	0.0581136	0.861232	0.90504	false	0.206875	0.345567	0.492632	false	1A
TraesCS1A02G206400	1.15	1.04	1.14	0.92	0.43	0.45	1.09	1.55	1.52	0.87	0.73	0.85	114	98	109	91	40	42	98	149	143	84	71	83	-0.52435	0.132929	0.182049	false	-0.626315	0.00890793	0.0134734	false	-0.18371	0.468472	0.516458	false	-1.01827	0.00209028	0.00367142	down	0.432384	0.0521859	0.100107	false	0.385758	0.264726	0.405418	false	1A
TraesCS1A02G206700	4.53	4.47	4.87	4.05	5.14	4.62	1.68	1.79	2.11	2.24	1.62	2.14	747	698	773	665	793	721	250	285	330	358	261	346	0.340485	0.00947557	0.0169325	false	0.241378	0.123033	0.155295	false	-0.953225	9.05703e-12	2.5985e-11	false	1.48488	2.59716e-25	2.02365e-24	up	-1.20492	4.66623e-22	9.41236e-21	down	-1.25303	2.13884e-17	3.41294e-16	down	1A
TraesCS1A02G206800	0.64	0.34	0.49	7.35	6.57	6.35	1.11	1.19	1.22	5.78	7.01	7.65	30	15	22	343	288	282	47	54	54	263	321	351	4.13692	7.037e-51	1.4054e-49	up	2.67412	8.24298e-40	5.78162e-39	up	4.05065	2.5653e-53	2.75557e-52	up	2.70919	1.03071e-35	1.15694e-34	up	1.36743	0.000379587	0.00127765	up	-0.0432771	0.793582	0.869623	false	1A
TraesCS1A02G206900	20.86	22.96	21.81	7.78	10.13	10.22	16.45	16.54	16.81	7.62	7.72	7.76	1962	2046	1977	728	891	911	1394	1505	1498	695	710	715	-0.875155	1.79585e-12	8.66884e-12	false	-0.970724	1.2916e-36	8.48454e-36	false	-1.25044	2.44068e-45	2.26177e-44	down	-0.645966	2.75292e-08	7.67166e-08	false	-0.290375	0.000182977	0.000654005	false	-0.33398	0.00679679	0.0198357	false	1A
TraesCS1A02G207500	0.6	0.48	0.5	2.87	2.37	2.3	0.22	0.33	0.15	2.33	1.22	1.11	37	28	30	177	137	135	12	20	9	140	74	67	2.6088	1.85951e-18	1.27176e-17	up	2.86269	5.59433e-12	1.67839e-11	up	1.81617	5.64274e-07	1.20081e-06	up	3.60422	3.53568e-24	2.61941e-23	up	NA	NA	NA	NA	-0.750695	0.00807543	0.0230917	false	1A
TraesCS1A02G207600	0.07	0.21	0.42	13.03	11.28	10.18	0.14	0.08	0.31	26.54	23.53	23.73	4	11	22	701	570	521	7	4	16	1391	1243	1256	5.95627	2.30782e-26	2.23829e-25	up	7.25268	3.77509e-134	7.78784e-133	up	6.95692	5.4937e-39	4.4449e-38	up	6.2025	1.01531e-79	3.06497e-78	up	NA	NA	NA	NA	1.04223	4.429e-17	6.827e-16	up	1A
TraesCS1A02G207900	1.02	0.48	1.11	0.87	1	0.87	1.23	1.58	1.38	1.67	1.84	1.7	68	30	71	58	62	55	74	102	87	108	120	111	0.417587	0.27455	0.3426	false	0.450186	0.051476	0.069612	false	1.25296	5.74404e-05	0.000105021	up	-0.435186	0.137453	0.177559	false	0.792609	0.0119112	0.0280303	false	0.876607	0.000855535	0.00310298	false	1A
TraesCS1A02G208000	1.03	1.19	1.01	1.68	1.46	1.8	0.96	1.15	0.96	2.52	2.49	2.38	163	179	155	265	217	271	137	177	144	388	386	370	0.968161	1.40426e-06	4.23013e-06	false	1.4037	1.02016e-20	4.4281e-20	up	1.45002	2.23324e-20	1.01039e-19	up	0.870738	9.92047e-06	2.24954e-05	false	0.0352904	0.851867	0.89813	false	0.525155	0.000824011	0.00299841	false	1A
TraesCS1A02G208600	6.76	7.75	6.14	9.83	11.83	9.97	7.53	7.63	8.25	14.81	14.55	15.34	1003	1088	877	1451	1640	1400	1005	1094	1159	2130	2109	2228	0.963542	6.20485e-15	3.51073e-14	false	1.0712	9.9998e-55	9.09266e-54	up	1.37092	1.12125e-47	1.08307e-46	up	0.613356	4.60062e-09	1.35856e-08	false	0.288952	0.00430034	0.0114378	false	0.448703	2.33615e-06	1.27307e-05	false	1A
TraesCS1A02G208900	5.39	5.22	5.69	2.47	2.82	2.97	1.24	1.39	1.57	1.4	0.59	1.3	329	302	335	150	161	172	68	82	91	83	35	78	-0.632453	0.000705313	0.00153101	false	-0.213921	0.503687	0.553812	false	-2.05333	1.0346e-16	3.93029e-16	down	1.15634	9.07217e-07	2.24578e-06	up	-1.84928	3.08804e-24	7.24933e-23	down	-1.38001	1.51294e-06	8.41982e-06	down	1A
TraesCS1A02G209100	57.72	46.28	57.61	5.91	4.14	6.81	52.3	54.89	56.15	3.21	3.63	3.39	2818	2140	2710	287	189	315	2300	2592	2598	152	173	162	-2.90531	2.8458e-63	7.48349e-62	down	-3.86053	0	0	down	-3.72879	3.47437e-191	1.79876e-189	down	-3.08872	3.45577e-95	1.32091e-93	down	0.121556	0.199546	0.301449	false	-0.779366	0.000219869	0.000894034	false	1A
TraesCS1A02G210400	0.39	0.69	0.71	8.73	10.13	8.68	0.89	1.03	0.45	12.1	11.16	12.2	29	48	50	638	695	604	59	73	31	862	801	877	4.2947	9.15323e-94	4.13127e-92	up	4.04179	2.56855e-37	1.71122e-36	up	4.56774	1.0065e-138	3.24402e-137	up	3.71899	4.83933e-69	1.20759e-67	up	0.512241	0.176691	0.273741	false	0.313704	0.00589848	0.0174884	false	1A
TraesCS1A02G210600	18.75	21.59	20.43	21.23	23.94	20.69	8.67	7.19	6.27	7.61	6.6	7.99	884	964	928	996	1055	924	368	328	280	348	304	369	0.465127	0.000107173	0.000261124	false	0.142911	0.334993	0.38556	false	-1.19653	9.31735e-23	4.66895e-22	down	1.754	1.33005e-36	1.5297e-35	up	-1.35072	1.05861e-26	2.89874e-25	down	-1.62026	8.17023e-39	4.17354e-37	down	1A
TraesCS1A02G210700	6.8	4.52	5.67	0.61	0.84	0.97	6.09	4.97	5.76	0.6	0.43	0.62	259	163	208	23	30	35	209	183	208	22	16	23	-2.46928	5.84987e-16	3.50897e-15	down	-3.2187	5.33485e-31	3.08813e-30	down	-3.11864	1.83199e-24	9.80304e-24	down	-2.61991	4.98294e-21	3.18276e-20	down	0.0895604	0.63351	0.731273	false	NA	NA	NA	NA	1A
TraesCS1A02G210800	1.2	0.98	0.66	11.09	12.49	9.23	1.07	0.96	0.91	17.8	15.44	17.17	130	100	69	1191	1260	944	104	100	93	1864	1629	1815	3.87273	8.10423e-95	3.71173e-93	up	4.24054	1.41958e-279	7.28606e-278	up	4.39965	1.99417e-196	1.08308e-194	up	3.6619	1.28843e-119	7.14662e-118	up	0.150888	0.555722	0.664381	false	0.568747	9.1808e-07	5.24158e-06	false	1A
TraesCS1A02G211000	14.88	11.86	12.43	1.25	1.41	1.03	7.03	7.34	7.63	0.79	0.54	0.52	1307	987	1052	109	116	86	556	624	635	67	46	45	-3.06029	2.108e-70	6.37212e-69	down	-3.43891	1.29814e-87	1.75478e-86	down	-4.15447	1.08316e-119	2.86602e-118	down	-2.39498	2.75367e-46	4.11438e-45	down	-0.725939	7.94709e-11	6.0515e-10	false	-1.05221	0.00032671	0.0012875	down	1A
TraesCS1A02G211500	0.15	0.34	0.46	2.46	2.53	2.33	0.41	0.43	0.2	3.43	2.99	3.3	11	24	33	181	175	163	27	31	14	246	216	239	3.29414	2.08262e-23	1.7855e-22	up	3.36373	2.69561e-37	1.79467e-36	up	3.60982	1.56458e-35	1.16724e-34	up	2.99772	7.47045e-23	5.22734e-22	up	NA	NA	NA	NA	0.356488	0.0457077	0.101283	false	1A
TraesCS1A02G211600	2.69	2.3	2.84	1.71	1.13	2.58	4.05	4.59	3.95	1.53	1.79	1.4	112	91	114	71	44	102	152	185	156	62	73	57	-0.172882	0.602639	0.665457	false	-1.27773	1.74602e-08	4.27456e-08	down	-0.47562	0.0808066	0.103466	false	-1.02708	0.000400845	0.000769157	down	0.791697	9.88009e-05	0.000370048	false	-0.257815	0.448757	0.593858	false	1A
TraesCS1A02G211800	0	0	0.07	0.23	0.47	0.17	0.03	0.05	0	1.19	1.06	1.32	0	0	3	10	19	7	1	2	0	50	45	56	NA	NA	NA	NA	5.7349	7.13316e-10	1.8987e-09	up	5.89852	4.03828e-10	1.04145e-09	up	NA	NA	NA	NA	NA	NA	NA	NA	1.99278	3.53955e-05	0.000164118	up	1A
TraesCS1A02G212000	0.06	0	0	0.86	0.9	0.9	0.19	0.18	0.15	1.17	1.45	1.19	4	0	0	55	54	55	11	11	9	73	91	75	5.72924	1.85755e-11	8.33428e-11	up	3.02718	5.43978e-14	1.80348e-13	up	6.15089	2.53492e-14	8.45307e-14	up	2.55274	3.29589e-08	9.12824e-08	up	NA	NA	NA	NA	0.465605	0.113288	0.211358	false	1A
TraesCS1A02G212300	0.53	0.25	0.27	0.39	0.7	0.33	0.85	1.1	1.04	1.36	0.67	0.8	29	13	14	21	36	17	42	58	54	72	36	43	NA	NA	NA	NA	0.0578654	0.869364	0.889148	false	1.68572	0.000333377	0.00056892	up	-0.907673	0.0338941	0.0494084	false	1.61684	9.72488e-05	0.000364652	up	0.954847	0.0322083	0.0757522	false	1A
TraesCS1A02G212400	0	0	0	0.51	0.19	0.27	0.09	0.2	0.37	1.69	1.46	1.71	0	0	0	26	9	13	4	10	18	84	73	86	NA	NA	NA	NA	3.01286	1.25618e-12	3.89471e-12	up	9.02976	1.99006e-13	6.3132e-13	up	NA	NA	NA	NA	NA	NA	NA	NA	2.2639	3.46921e-08	2.27575e-07	up	1A
TraesCS1A02G212700	21.54	21.04	21.02	1.58	1.66	1.13	28.36	30.16	29	1.24	0.68	1.3	1805	1670	1697	132	130	90	2140	2444	2303	101	56	107	-3.51174	2.83053e-116	1.77958e-114	down	-4.62295	5.9915e-72	6.80246e-71	down	-4.04437	1.13166e-153	4.23999e-152	down	-4.14056	4.13495e-201	5.66917e-199	down	0.567933	5.60418e-14	5.84845e-13	false	-0.490945	0.0862135	0.169998	false	1A
TraesCS1A02G213000	21.26	23.19	20.59	7.53	7.83	7.6	41.57	38.18	38.59	14.15	15.81	13.97	1969	2034	1837	694	678	667	3467	3420	3386	1271	1431	1267	-1.15104	2.24268e-24	2.00696e-23	down	-1.29169	4.13557e-81	5.20898e-80	down	-0.309917	0.000547233	0.000916179	false	-2.18381	6.07038e-117	3.23702e-115	down	0.97112	8.90335e-38	3.94588e-36	false	0.883461	1.14337e-16	1.69605e-15	false	1A
TraesCS1A02G213300	1.81	3.17	1.96	0.55	1.03	0.96	3.65	3.08	3.04	1.28	1.38	1.85	70	116	73	21	37	35	127	115	111	48	52	70	-1.11262	0.00415523	0.00793051	down	-0.975983	0.00017008	0.000311323	false	-0.363204	0.258691	0.302103	false	-1.77627	3.7254e-08	1.02729e-07	down	0.601841	0.0176544	0.0395093	false	0.789809	0.0405932	0.0918276	false	1A
TraesCS1A02G213700	2.65	2.24	2.68	0	0	0	1.67	1.55	1.35	0	0	0	184	147	179	0	0	0	104	104	89	0	0	0	-9.48457	5.79039e-15	3.2841e-14	down	-8.99237	1.56295e-13	5.06105e-13	down	-9.60411	1.85986e-15	6.62238e-15	down	-8.92357	3.63476e-13	1.45527e-12	down	-0.622684	0.00259817	0.00728448	false	NA	NA	NA	NA	1A
TraesCS1A02G213800	1.39	0.8	1.57	0.16	0.24	0.34	0.77	1.13	1.35	0.83	0.71	0.56	86	47	94	10	14	20	43	68	79	50	43	34	-1.99688	1.822e-05	4.86934e-05	down	-0.492756	0.146762	0.182511	false	-0.588511	0.100934	0.127145	false	-1.95073	1.70297e-05	3.77756e-05	down	-0.105503	0.742895	0.817907	false	1.44961	0.00247216	0.0080913	up	1A
TraesCS1A02G214100	0.33	0.28	0.29	0.12	0.16	0.16	0.59	0.56	0.62	0.28	0.35	0.35	41	33	34	15	19	19	65	67	72	34	42	42	NA	NA	NA	NA	-0.708664	0.0231199	0.0329668	false	NA	NA	NA	NA	-1.79365	6.47333e-06	1.49069e-05	down	1.074	0.000548541	0.0017877	up	NA	NA	NA	NA	1A
TraesCS1A02G214200	0.5	0.49	0.57	0.17	0.19	0	0.59	0.81	0.65	0.2	0.37	0.16	53	49	59	18	19	0	57	83	66	21	39	17	-1.76683	0.00565754	0.0105187	down	-1.3345	0.000438238	0.000770557	down	-0.817261	0.0527235	0.0695396	false	-2.33579	0.0506856	0.071508	false	0.50742	0.0827258	0.147078	false	NA	NA	NA	NA	1A
TraesCS1A02G214300	24.52	29.19	25.59	9.21	10.79	9.76	19.81	19.71	21.36	10.82	8.67	8.69	1986	2239	1997	742	817	749	1445	1544	1639	850	686	689	-1.06494	4.8446e-20	3.57463e-19	down	-0.97392	1.15098e-25	5.81534e-25	false	-1.23614	5.49298e-30	3.52742e-29	down	-0.853114	2.51447e-16	1.23382e-15	false	-0.273123	0.0014901	0.00442528	false	-0.129863	0.29966	0.444255	false	1A
TraesCS1A02G214600	52.47	50.96	47.96	79.14	67.43	78.22	61.05	61.52	65.87	91.08	100.65	92.93	1298	1194	1143	1948	1559	1833	1360	1472	1544	2185	2433	2251	0.924194	1.09867e-13	5.7374e-13	false	0.732532	6.12379e-27	3.19866e-26	false	1.16599	4.15931e-42	3.60119e-41	up	0.439436	7.71685e-05	0.000160552	false	0.423015	6.87952e-07	3.51343e-06	false	0.285338	0.00655517	0.0192209	false	1A
TraesCS1A02G215100	0.64	0.72	0.31	3.76	3.69	3.46	1.51	1.36	1.37	6.76	8.26	7	60	64	28	350	323	307	127	123	122	614	756	642	3.05768	1.66555e-33	2.08718e-32	up	2.51577	3.92211e-72	4.46402e-71	up	3.97501	2.23993e-85	3.95407e-84	up	1.54637	6.66157e-18	3.59488e-17	up	1.44974	3.56065e-07	1.88379e-06	up	0.960684	2.95462e-12	2.89779e-11	false	1A
TraesCS1A02G215300	1.12	0.75	0.99	1.38	1.32	2.08	1	1.15	1.3	1.62	1.39	1.31	47	30	40	58	52	83	38	47	52	66	57	54	1.09495	0.00366778	0.00707041	up	0.454005	0.150931	0.187208	false	0.846951	0.0155551	0.0220811	false	0.651056	0.0621281	0.086178	false	0.382692	0.27475	0.388348	false	-0.204823	0.525024	0.661755	false	1A
TraesCS1A02G215400	4.62	5.35	4.71	4.81	7.75	5.49	3.05	3.51	3.78	8.39	7.83	8.88	2597	2851	2553	2690	4072	2927	1543	1909	2015	4579	4302	4892	0.639638	4.27788e-06	1.22371e-05	false	1.41701	9.66277e-82	1.22745e-80	up	1.03028	1.7134e-37	1.33794e-36	up	0.976826	8.33714e-13	3.25558e-12	false	-0.397508	1.88547e-05	7.94963e-05	false	0.43	0.000741487	0.00272201	false	1A
TraesCS1A02G215900	0	0.03	0.05	5.05	5.63	4.86	0	0.14	0.05	7.5	7.9	8.51	0	2	3	337	353	309	0	9	3	488	518	559	8.00774	1.89057e-32	2.28012e-31	up	7.10955	7.39752e-59	7.13435e-58	up	8.53655	5.38127e-38	4.25166e-37	up	6.53155	1.85706e-45	2.72379e-44	up	NA	NA	NA	NA	0.570098	2.80618e-05	0.000132155	false	1A
TraesCS1A02G216700	1.87	2.62	2.94	0.82	0.84	1.48	0.52	0.12	0.31	0	0	0	64	85	97	28	27	48	16	4	10	0	0	0	-0.887437	0.0206464	0.0344103	false	NA	NA	NA	NA	-8.55597	5.27026e-12	1.53221e-11	down	NA	NA	NA	NA	-2.87571	5.83116e-11	4.50492e-10	down	NA	NA	NA	NA	1A
TraesCS1A02G217500	0.91	0.92	1.32	0.38	0.82	0.23	1.7	1.42	1.24	1.27	0.89	1.31	51	49	71	21	43	12	86	77	66	69	49	72	-0.814291	0.0890417	0.12793	false	-0.191176	0.505761	0.555826	false	0.39779	0.226606	0.267679	false	-1.45148	0.000650355	0.00121743	down	0.578116	0.0465956	0.0909401	false	1.24783	0.00440204	0.0134987	up	1A
TraesCS1A02G217600	1.19	0.64	0.51	0.1	0.35	0.14	0.99	0.42	0.52	0.53	0.13	0.26	83	42	34	7	23	9	62	28	34	36	9	18	-1.66045	0.00329123	0.00639717	down	NA	NA	NA	NA	-1.07832	0.0366591	0.0494868	down	NA	NA	NA	NA	-0.184531	0.65414	0.747886	false	NA	NA	NA	NA	1A
TraesCS1A02G217800	0.31	0.39	0.21	0.24	0.28	0.34	3.25	2.91	2.92	2.31	2.24	2.1	26	31	17	20	22	27	245	236	232	188	183	172	NA	NA	NA	NA	-0.312604	0.0518054	0.0700098	false	3.12346	2.35478e-28	1.43858e-27	up	-3.2195	1.91886e-31	1.89444e-30	down	3.42527	1.08343e-41	5.56354e-40	up	2.89789	4.3272e-24	1.13726e-22	up	1A
TraesCS1A02G218000	7.7	5.95	6.29	2.06	1.96	2.22	6.89	6.47	6.43	10.27	10.77	11.55	480	351	378	128	114	131	387	390	380	621	656	705	-1.32641	2.53306e-11	1.12547e-10	down	0.857009	1.41268e-15	5.04051e-15	false	0.961969	6.91666e-13	2.12501e-12	false	-1.48287	2.97655e-17	1.54691e-16	down	0.094876	0.491217	0.606314	false	2.33129	1.16152e-52	9.71219e-51	up	1A
TraesCS1A02G218100	1	0.58	0.75	1.1	0.61	1.11	1.08	1.03	1.24	0.5	0.16	0.24	51	28	37	56	29	54	50	51	60	25	8	12	0.635485	0.13838	0.188705	false	-1.75524	0.000100371	0.000187453	down	NA	NA	NA	NA	-0.0578999	0.876773	0.898444	false	0.631252	0.0655953	0.121225	false	-1.70451	0.000784215	0.00286487	down	1A
TraesCS1A02G218200	0.61	0.38	0.59	0.4	0.28	0.15	0.95	0.61	0.76	0.68	0.45	0.57	77	46	72	50	33	18	109	75	91	83	56	71	-0.584379	0.174585	0.231546	false	-0.312189	0.259467	0.306422	false	0.356507	0.264173	0.308	false	-1.3039	0.000559315	0.00105507	down	0.658159	0.0205626	0.0450974	false	0.983173	0.0114573	0.0313857	false	1A
TraesCS1A02G218400	1.42	1.87	0.97	4.14	5.29	5.15	3.33	3.8	3.67	9.06	7.95	8.8	162	202	107	470	564	556	342	419	397	1002	886	983	2.12338	7.18388e-25	6.55499e-24	up	1.39303	6.03341e-42	4.40863e-41	up	2.85578	9.04085e-67	1.21672e-65	up	0.609919	2.09252e-05	4.59884e-05	false	1.45142	1.41559e-14	1.56992e-13	up	0.774083	3.49218e-10	2.75887e-09	false	1A
TraesCS1A02G218600	0	0	0	6.99	5.87	4.99	0	0	0	3.77	3.82	5.05	0	0	0	571	450	388	0	0	0	300	306	406	11.6838	1.36746e-22	1.13257e-21	up	10.9208	5.1489e-20	2.18672e-19	up	11.0869	1.62563e-20	7.4033e-20	up	11.4666	7.2758e-22	4.85189e-21	up	NA	NA	NA	NA	-0.554115	0.00120724	0.00423654	false	1A
TraesCS1A02G218800	33.9	32.79	33.78	18.47	16.55	18.82	37.88	41.03	37.74	16.78	15.92	18.76	1894	1735	1818	1027	864	996	1906	2217	1998	909	869	1026	-0.547305	5.26182e-06	1.49008e-05	false	-1.04422	1.7099e-39	1.19037e-38	down	-0.7107	3.43688e-14	1.13711e-13	false	-0.931998	1.69812e-17	8.96393e-17	false	0.322987	4.28059e-05	0.000170644	false	-0.120538	0.300661	0.445264	false	1A
TraesCS1A02G219000	1.03	0.98	0.85	1.85	1.79	1.63	1.1	1.41	1.76	2.02	1.23	2.06	94	85	75	169	153	142	91	125	153	180	110	185	1.23689	3.64387e-07	1.16172e-06	up	0.450399	0.0614577	0.0820427	false	1.15168	6.18001e-06	1.22382e-05	up	0.484983	0.039631	0.0570679	false	0.690917	0.00456711	0.0120575	false	-0.0434605	0.850602	0.907845	false	1A
TraesCS1A02G219200	3.19	2.44	3.54	7.46	4.57	6.75	4.23	3.13	3.95	7.59	8.33	8.35	192	139	205	447	257	385	229	182	225	443	490	492	1.39303	1.33023e-09	5.19078e-09	up	1.24266	7.15419e-19	2.91286e-18	up	1.65795	4.00144e-24	2.11424e-23	up	0.925585	1.04309e-05	2.36026e-05	false	0.405551	0.0352751	0.0717439	false	0.309742	0.0825692	0.164327	false	1A
TraesCS1A02G220100	0.25	0.19	0.17	0.21	0.28	0.43	0.23	0.31	0.27	0.38	0.36	0.49	30	22	20	25	32	49	25	36	31	44	42	58	NA	NA	NA	NA	0.730089	0.047815	0.0649868	false	1.24878	0.00223354	0.00350699	up	NA	NA	NA	NA	NA	NA	NA	NA	0.35961	0.364521	0.512476	false	1A
TraesCS1A02G220200	16.5	21.87	18.68	22.19	27.36	24.79	15.15	13.26	13.52	23.13	21.83	18.73	1082	1358	1180	1448	1677	1540	895	841	840	1471	1399	1203	0.730956	7.52682e-09	2.76202e-08	false	0.741301	2.04568e-15	7.24147e-15	false	0.416708	0.000257826	0.000444662	false	1.00499	2.8537e-20	1.75501e-19	up	-0.335611	0.00207762	0.00596435	false	-0.27296	0.0136794	0.0366172	false	1A
TraesCS1A02G220300	5.58	4.74	4.92	2.47	1.83	1.9	7.37	6.85	7.24	0.78	0.74	1.15	332	267	282	146	102	107	395	394	408	45	43	67	-0.942715	1.52289e-05	4.10321e-05	false	-2.86889	3.11981e-50	2.63624e-49	down	-2.25906	6.55861e-23	3.30997e-22	down	-1.60397	1.23737e-17	6.574e-17	down	0.599415	8.96072e-06	3.95227e-05	false	-1.27318	1.24859e-05	6.17858e-05	down	1A
TraesCS1A02G220500	0.19	0.56	0.81	0.09	0.4	0	2.15	2.13	2.54	0.64	0.32	0.51	6	17	25	3	12	0	62	66	77	20	10	16	NA	NA	NA	NA	-2.07288	1.58567e-07	3.66293e-07	down	NA	NA	NA	NA	-3.62887	1.46036e-09	4.4729e-09	down	2.24272	7.32583e-08	4.1799e-07	up	NA	NA	NA	NA	1A
TraesCS1A02G220900	0.22	0.08	0.08	0.22	0.19	0.25	0.47	0.34	0.48	0.32	0.1	0.3	22	8	8	22	18	24	43	33	46	31	10	30	NA	NA	NA	NA	-0.701865	0.125	0.157598	false	NA	NA	NA	NA	-0.780997	0.0807294	0.109384	false	1.84772	0.000159849	0.000577473	up	NA	NA	NA	NA	1A
TraesCS1A02G221000	4.04	4.21	4.55	7.9	6.17	5.3	8.72	9.15	8.57	6.51	6.85	6.34	393	388	426	765	561	488	764	861	790	614	651	604	0.952943	4.72573e-08	1.62922e-07	false	-0.287775	0.00199088	0.0032601	false	0.877686	4.14708e-13	1.29132e-12	false	-0.263509	0.0839898	0.113433	false	1.15485	3.74618e-26	9.9124e-25	up	-0.0321522	0.832367	0.89558	false	1A
TraesCS1A02G221200	0.88	1.61	1.05	0.44	0.35	0.76	1.35	1.76	1.36	0.7	0.58	0.4	56	97	64	28	21	46	77	108	82	43	36	25	-0.82082	0.0499825	0.0763341	false	-1.275	6.26757e-05	0.000119238	down	-0.814862	0.0290691	0.0398156	false	-1.33296	0.000285339	0.000557274	down	0.448858	0.112404	0.189674	false	0.0501218	0.9117	0.946975	false	1A
TraesCS1A02G221300	0.79	0.42	1.11	0.31	0.15	0.45	0.79	0.45	0.54	0.21	0.31	0.29	62	31	84	24	11	33	56	34	40	16	24	22	-1.00664	0.0471963	0.0725518	false	NA	NA	NA	NA	-1.2673	0.00528889	0.00796519	down	NA	NA	NA	NA	-0.282765	0.460578	0.577771	false	NA	NA	NA	NA	1A
TraesCS1A02G221400	39.44	34.72	39.64	3.55	2.61	2.22	27.98	30.79	30.9	1.08	0.8	0.77	2365	1972	2290	212	146	126	1511	1786	1756	63	47	45	-3.4088	5.34707e-94	2.41892e-92	down	-4.94341	1.04556e-253	4.70265e-252	down	-5.16974	5.61512e-240	4.14389e-238	down	-3.23321	6.22234e-97	2.47172e-95	down	-0.236814	0.00719709	0.0179981	false	-1.71709	6.41414e-10	4.93681e-09	down	1A
TraesCS1A02G221700	0.82	0.87	0.73	6.14	6.65	6.83	1.46	1.24	1.1	14.75	15	13.87	42	42	36	312	317	330	67	61	53	730	748	693	3.36638	3.4988e-49	6.74797e-48	up	3.6647	3.43339e-122	6.43519e-121	up	4.42493	1.63897e-130	4.87718e-129	up	2.5543	1.06711e-34	1.16028e-33	up	0.751215	0.0180712	0.0403211	false	1.10089	4.16204e-18	7.13153e-17	up	1A
TraesCS1A02G221900	8.45	10.7	7.99	22.87	23.75	27.09	8.16	9.5	8.69	17.78	19.58	17.92	629	755	573	1695	1653	1911	547	684	613	1284	1425	1307	1.79452	1.30485e-39	1.95615e-38	up	1.20601	2.86857e-41	2.0672e-40	up	1.28392	2.36624e-29	1.49044e-28	up	1.66552	4.06428e-46	6.05326e-45	up	0.0668576	0.593552	0.697251	false	-0.467782	6.64477e-06	3.40955e-05	false	1A
TraesCS1A02G222500	0.57	1.03	0.45	1.74	1.01	1.32	1.38	1.37	0.86	1.56	1.69	1.99	21	36	16	64	35	46	46	49	30	56	61	72	1.35841	0.00343658	0.00665864	up	0.675146	0.0406259	0.0558188	false	1.61801	4.77374e-05	8.79141e-05	up	0.362683	0.35953	0.418529	false	0.931623	0.029612	0.0617528	false	0.304787	0.372234	0.52022	false	1A
TraesCS1A02G222700	0.26	0.14	0.19	1.11	1.02	0.89	0.82	0.76	0.6	0.58	0.45	0.65	29	15	21	125	108	96	84	83	65	64	50	72	2.70798	1.57957e-14	8.69476e-14	up	-0.239885	0.40053	0.452065	false	1.76659	9.11598e-06	1.78199e-05	up	0.651057	0.0148467	0.0230107	false	1.99594	1.38707e-08	8.51289e-08	up	-0.899672	0.000985032	0.00352322	false	1A
TraesCS1A02G222800	4.56	5.67	4.85	1.66	2.31	1.74	3.79	3.87	3.18	1.78	2.06	2.1	801	944	821	291	380	290	600	658	529	304	353	362	-1.05286	1.3635e-11	6.17061e-11	down	-0.730005	4.56907e-09	1.15997e-08	false	-1.08646	1.98443e-17	7.80543e-17	down	-0.746962	1.64209e-06	3.97766e-06	false	-0.367355	0.00177361	0.00517412	false	0.00705197	0.965483	0.979287	false	1A
TraesCS1A02G222900	30.18	30.76	28.98	11.67	12.05	13.49	27.99	28.44	27.12	9.44	9.8	8.8	2259	2181	2090	869	843	957	1887	2059	1924	685	717	645	-0.922162	7.84804e-16	4.67902e-15	false	-1.43813	3.13628e-78	3.83059e-77	down	-1.42582	2.30779e-56	2.61604e-55	down	-0.985509	4.65223e-21	2.97716e-20	false	0.00167584	0.982002	0.988193	false	-0.461127	7.22296e-05	0.00031888	false	1A
TraesCS1A02G223700	5.34	5.47	5.24	5.04	6.9	5.31	1.71	1.73	1.76	2.93	2.67	3.01	990	962	936	931	1197	933	285	310	309	528	484	547	0.448976	0.00055966	0.00123288	false	0.867995	2.59593e-13	8.32373e-13	false	-0.64202	1.95721e-09	4.83754e-09	false	1.90884	1.32628e-44	1.90167e-43	up	-1.5206	1.82951e-45	1.08082e-43	down	-1.05064	5.13903e-16	7.22436e-15	down	1A
TraesCS1A02G225200	4.49	5.16	4.63	7.18	8.44	7.78	4.72	3.64	4.41	8.43	10.05	9.59	416	453	413	662	731	683	394	326	387	757	910	870	1.0616	6.80849e-15	3.84123e-14	up	1.27529	4.69258e-28	2.52563e-27	up	1.23113	2.97608e-25	1.63771e-24	up	1.05491	2.2469e-14	9.70349e-14	up	-0.0546414	0.686367	0.77356	false	0.211281	0.073292	0.149011	false	1A
TraesCS1A02G226100	0.32	0.63	0.55	0.23	0.5	0.22	0.84	0.78	0.7	0.56	0.5	0.46	25	46	41	18	36	16	58	58	51	42	38	35	NA	NA	NA	NA	-0.457739	0.167156	0.205478	false	0.282379	0.486955	0.534878	false	-1.11009	0.00962486	0.0153939	down	0.728985	0.0355746	0.0722583	false	NA	NA	NA	NA	1A
TraesCS1A02G226300	7.59	8.83	8.89	11.66	13.32	10.38	5.77	5.73	6.74	11.81	12.37	11.61	549	605	619	839	900	711	376	401	462	828	874	822	0.830505	1.8652e-09	7.18797e-09	false	1.10892	5.23885e-27	2.74195e-26	up	0.75583	6.17633e-12	1.78947e-11	false	1.13344	3.65908e-17	1.89013e-16	up	-0.363818	0.0031641	0.00869363	false	-0.0334707	0.775272	0.857062	false	1A
TraesCS1A02G226500	5.64	7.95	5.46	1.45	2.08	1.87	3.51	3.65	4.02	2.49	2.76	2.38	578	771	539	148	199	181	324	362	390	247	276	239	-1.47253	1.17058e-14	6.50782e-14	down	-0.415042	0.00270581	0.00436394	false	-1.06259	2.59144e-11	7.21795e-11	down	-0.875463	7.90502e-07	1.96612e-06	false	-0.658469	6.15986e-06	2.78105e-05	false	0.451168	0.0155162	0.0407829	false	1A
TraesCS1A02G227000	5.29	4.74	4.15	32.14	34.23	35.27	4.7	4.27	3.8	31.76	31.01	29.89	369	313	279	2231	2232	2331	295	288	251	2149	2114	2042	3.19083	8.30434e-140	6.94412e-138	up	2.99881	2.1794e-241	9.11495e-240	up	2.96272	4.04263e-173	1.77841e-171	up	3.1754	3.06407e-166	3.03593e-164	up	-0.0457307	0.764589	0.83417	false	-0.185712	0.0339955	0.0792637	false	1A
TraesCS1A02G227300	0.45	0.53	0.63	4.2	3.75	2.85	1.05	0.95	1.26	3.77	3.87	4.18	67	74	90	621	520	401	141	137	178	543	561	608	3.10211	1.95665e-48	3.6976e-47	up	1.99009	1.89113e-46	1.49963e-45	up	3.13557	4.29231e-77	6.73886e-76	up	1.90646	2.63281e-24	1.96111e-23	up	1.13446	7.16054e-07	3.64872e-06	up	0.0752866	0.619128	0.73933	false	1A
TraesCS1A02G228100	0.48	0.57	0.47	8.3	8.47	7.27	0.71	0.73	0.53	7.5	6.62	7.21	39	44	37	671	643	559	52	57	41	591	525	573	4.33003	5.55434e-100	2.74628e-98	up	3.57423	2.64559e-93	3.80934e-92	up	4.06244	1.69723e-99	3.60929e-98	up	3.7909	9.55105e-88	3.28484e-86	up	0.477634	0.155189	0.246491	false	-0.225806	0.0709684	0.145186	false	1A
TraesCS1A02G228500	3.31	2.73	3.27	0.45	0.77	0.63	4.06	4.21	3.65	1.42	1.13	1.07	183	143	174	25	40	33	202	225	191	76	61	58	-1.98453	6.50389e-11	2.80102e-10	down	-1.58222	1.50737e-13	4.88506e-13	down	-1.10955	6.49586e-06	1.28428e-05	down	-2.50713	2.11627e-20	1.31172e-19	down	0.461902	0.0090985	0.0221355	false	0.915155	0.0107372	0.0296748	false	1A
TraesCS1A02G229500	1.09	0.96	0.66	0.14	0.26	0.21	0.35	0.5	0.33	0.08	0.02	0.11	72	60	42	9	16	13	21	32	21	5	1	7	-1.82604	0.000181956	0.000429438	down	NA	NA	NA	NA	-3.49255	6.61204e-09	1.5856e-08	down	NA	NA	NA	NA	-1.07781	0.00446764	0.011823	down	NA	NA	NA	NA	1A
TraesCS1A02G229800	9.14	7.85	10.73	3.86	2.96	4.9	22.21	19.99	21.24	5.54	5.61	6.68	602	490	681	253	182	306	1318	1274	1326	354	361	431	-0.887733	1.43177e-05	3.87182e-05	false	-1.69359	5.75704e-67	6.14332e-66	down	-0.383103	0.00962871	0.0140621	false	-2.25002	1.08891e-44	1.56426e-43	down	1.30028	6.29328e-30	2.00907e-28	up	0.548417	0.00393087	0.0122078	false	1A
TraesCS1A02G229900	3.44	3.31	3.7	4.84	5.23	4.51	3.92	3.87	2.99	6.41	6.87	5.95	194	177	201	272	276	241	199	211	160	351	379	329	0.829825	7.4208e-06	2.07088e-05	false	0.974045	3.37667e-10	9.14927e-10	false	1.13601	6.76155e-13	2.07862e-12	up	0.616988	0.000888708	0.00163523	false	0.15136	0.398268	0.517471	false	0.347882	0.0236826	0.0584592	false	1A
TraesCS1A02G230100	5.84	6.28	4.95	11.43	9.36	14.06	9.83	11.55	9.5	17.65	18.67	18.86	229	233	187	446	343	522	347	438	353	671	715	724	1.38603	1.68643e-12	8.1553e-12	up	0.973288	4.16889e-18	1.65128e-17	false	1.94854	2.97712e-48	2.90852e-47	up	0.359027	0.0416768	0.059763	false	0.964486	2.81171e-10	2.02481e-09	false	0.60676	6.82726e-05	0.00030258	false	1A
TraesCS1A02G230300	0.58	0.74	0.31	0.12	0.36	0.14	0.4	0.31	0.35	0.37	0.34	0.41	76	92	39	16	44	18	47	39	43	47	44	53	-1.04619	0.0281593	0.0455818	down	0.237278	0.479384	0.53015	false	-0.274978	0.447682	0.495808	false	-0.583754	0.215682	0.266047	false	-0.523141	0.13366	0.21867	false	0.808274	0.0712526	0.145652	false	1A
TraesCS1A02G230400	16.03	14.49	14.96	51.84	45.55	48.81	19.81	18.19	21.2	64.19	62.65	64.01	1284	1099	1154	4131	3409	3703	1429	1409	1609	4985	4903	5020	2.03712	3.39348e-69	1.0037e-67	up	1.8265	4.73999e-201	1.5653e-199	up	2.32359	2.50079e-199	1.38543e-197	up	1.48888	2.53764e-46	3.79347e-45	up	0.486795	9.86628e-08	5.55887e-07	false	0.329565	0.000242947	0.000980024	false	1A
TraesCS1A02G230500	0.05	0.12	0.1	2.68	2.23	1.38	0.16	0.05	0.03	0.68	1.05	0.64	3	7	6	169	132	83	9	3	2	42	65	40	4.9467	7.01549e-24	6.15129e-23	up	3.46415	3.56868e-09	9.11504e-09	up	3.44437	1.10941e-09	2.78411e-09	up	4.91741	1.16026e-21	7.66318e-21	up	NA	NA	NA	NA	-1.45862	4.18713e-06	2.20882e-05	down	1A
TraesCS1A02G231000	29.48	23.17	26.28	66.64	70.95	65.8	23.69	29.42	23.46	91	103.43	97.87	630	469	541	1417	1417	1332	456	608	475	1886	2160	2048	1.71297	4.16002e-39	6.14131e-38	up	2.06846	9.16513e-107	1.50789e-105	up	2.14208	2.96564e-88	5.43528e-87	up	1.58857	1.80979e-38	2.19448e-37	up	0.0632266	0.640778	0.737102	false	0.471219	5.94995e-07	3.46807e-06	false	1A
TraesCS1A02G231100	4.89	5.79	5.25	10.2	12.99	11.22	4.7	3.97	4.19	8.83	9.58	8.91	638	716	661	1326	1585	1388	553	502	519	1118	1222	1139	1.45847	6.46113e-32	7.65021e-31	up	1.2239	1.19298e-39	8.33424e-39	up	1.03442	4.36098e-24	2.30042e-23	up	1.59727	2.23059e-41	2.92991e-40	up	-0.200091	0.0807529	0.144132	false	-0.382929	0.000293996	0.00116849	false	1A
TraesCS1A02G231700	5.14	4.77	3.86	0.73	0.47	0.35	5.3	4.9	4.42	1.28	0.97	0.78	141	124	102	20	12	9	131	130	115	34	26	21	-2.79436	2.21324e-12	1.06039e-11	down	-2.13408	5.98457e-13	1.88368e-12	down	-1.92959	2.16592e-09	5.33929e-09	down	-3.04992	2.89216e-16	1.41298e-15	down	0.193242	0.365286	0.483988	false	NA	NA	NA	NA	1A
TraesCS1A02G234300	0.66	0.45	0.41	0.37	0.51	1.12	0.47	0.49	0.98	0.82	1.3	1.73	25	16	15	14	18	40	16	18	35	30	48	64	NA	NA	NA	NA	1.12503	0.0107309	0.0160431	up	1.59044	0.000511159	0.000858048	up	NA	NA	NA	NA	NA	NA	NA	NA	0.893679	0.0630892	0.132047	false	1A
TraesCS1A02G234400	7.65	7.95	7.41	3.19	4.18	3.29	6.36	7.15	7.18	1.53	1.88	1.65	407	401	380	169	208	166	305	368	362	79	98	86	-0.763938	1.59763e-05	4.29615e-05	false	-1.89332	1.31834e-27	7.01329e-27	down	-1.92817	6.19974e-27	3.61003e-26	down	-0.779528	7.54952e-06	1.72902e-05	false	-0.0451354	0.726717	0.805276	false	-1.1231	4.83981e-07	2.85127e-06	down	1A
TraesCS1A02G234600	28.01	27.67	31.61	231.51	189.77	178.59	24.63	23.95	23.99	40.38	44.02	40.17	1879	1758	2043	15455	11899	11350	1488	1554	1525	2627	2886	2639	3.13453	1.57644e-135	1.26278e-133	up	0.917134	3.11902e-46	2.46512e-45	false	0.768087	6.24576e-19	2.64828e-18	false	3.23244	1.25098e-185	1.50457e-183	up	-0.159538	0.0594947	0.11181	false	-2.32325	3.8673e-102	1.11546e-99	down	1A
TraesCS1A02G234800	6.05	7.17	4.45	0.39	0.22	0.47	0.75	0.96	1.19	0.06	0.04	0.15	529	594	375	34	18	39	59	81	99	5	3	13	-3.66918	3.32824e-41	5.19666e-40	down	-3.4235	1.25321e-12	3.88571e-12	down	-5.90893	2.42477e-56	2.74762e-55	down	-1.2337	0.00130429	0.00235076	down	-2.49538	4.87896e-35	1.94301e-33	down	NA	NA	NA	NA	1A
TraesCS1A02G235000	0.71	0.57	0.71	36.58	27.73	29.04	1.27	1.32	0.91	66.44	61.56	67.02	65	49	63	3330	2371	2517	105	117	79	5894	5503	6004	5.90486	1.39555e-235	3.25642e-233	up	5.93443	0	0	up	6.86681	0	0	up	4.92021	2.3056e-203	3.23407e-201	up	0.923194	0.000617515	0.00199062	false	1.0057	8.63545e-19	1.56364e-17	up	1A
TraesCS1A02G235100	1.29	1.67	1.16	6.03	7.2	7.68	2.17	2	1.86	12.91	11.22	11.83	157	193	137	732	821	888	239	236	215	1529	1339	1414	2.69342	8.68122e-58	2.02491e-56	up	2.71436	2.29892e-152	5.42142e-151	up	3.38376	1.21222e-147	4.25879e-146	up	1.97283	5.32242e-43	7.32369e-42	up	0.658755	0.000281971	0.000974711	false	0.732147	1.5823e-10	1.29835e-09	false	1A
TraesCS1A02G235200	1.92	1.5	1.83	0.92	0.66	0.98	0.37	0.66	0.63	0.77	0.72	0.35	210	156	193	100	68	102	36	70	65	82	77	38	-0.678895	0.00848741	0.0153029	false	0.294984	0.403089	0.454558	false	-1.25433	6.39034e-06	1.2642e-05	down	0.818924	0.012448	0.0195515	false	-1.55787	3.80309e-10	2.70142e-09	down	-0.531598	0.106206	0.200749	false	1A
TraesCS1A02G235800	1.29	0.79	0.96	0.55	0.1	0.14	0.83	1.22	1.32	0.35	0.53	0.16	57	33	41	24	4	6	33	52	55	15	23	7	NA	NA	NA	NA	-1.54898	0.00113093	0.00190387	down	NA	NA	NA	NA	-1.88653	0.00137915	0.00247752	down	0.249617	0.482947	0.59869	false	NA	NA	NA	NA	1A
TraesCS1A02G236100	1.5	0.81	1.32	0.9	0.98	0.76	2.56	2.73	2.77	3.67	3.35	3.92	166	85	141	99	101	80	255	292	290	394	362	424	-0.117779	0.684821	0.738742	false	0.577795	1.05411e-05	2.13922e-05	false	1.83939	7.63431e-20	3.37086e-19	up	-1.42953	1.05389e-12	4.08775e-12	down	1.25152	7.59549e-10	5.23919e-09	up	1.99831	5.73062e-28	1.87874e-26	up	1A
TraesCS1A02G236400	2.38	2.54	3.42	10.89	11.31	13.19	3.61	3.21	2.82	10.75	12.57	10.89	99	100	137	450	439	519	135	129	111	433	510	443	2.43409	1.17023e-35	1.56444e-34	up	1.96568	1.2144e-37	8.13968e-37	up	2.29016	8.37e-39	6.74251e-38	up	2.05855	8.26457e-32	8.26825e-31	up	0.314061	0.16572	0.260159	false	-0.101513	0.470902	0.614646	false	1A
TraesCS1A02G236700	3.04	4.54	3.92	4.93	5.08	4.19	4.3	2.91	3.44	7.86	7.72	6.83	157	222	195	253	245	205	200	145	168	393	389	345	0.656004	0.00160824	0.0032993	false	1.21319	5.88353e-14	1.94617e-13	up	1.2191	1.05444e-12	3.20208e-12	up	0.599119	0.0030289	0.00520856	false	-0.00493535	0.98058	0.987116	false	0.604743	0.000138083	0.000582245	false	1A
TraesCS1A02G237100	3.37	3.31	2.96	1.02	1.91	1.18	3.01	2.63	3.17	1.24	1.56	1.19	205	191	174	62	109	68	165	155	183	73	93	71	-0.889737	0.000770481	0.00166299	false	-1.0048	4.17958e-06	8.73774e-06	down	-1.01803	6.40508e-06	1.26707e-05	down	-0.926335	0.000375352	0.000722431	false	-0.0237307	0.893278	0.927513	false	-0.0887008	0.769327	0.853098	false	1A
TraesCS1A02G237800	31.03	31.42	29.84	8.64	9.08	8.68	31.28	29.68	30.82	5.9	6.35	5.3	1740	1669	1612	482	476	461	1580	1610	1638	321	348	291	-1.45591	1.18422e-35	1.58278e-34	down	-2.2491	8.08003e-131	1.62527e-129	down	-2.13906	3.21049e-89	5.96664e-88	down	-1.61675	1.70158e-52	2.94946e-51	down	0.0994216	0.198009	0.299567	false	-0.640934	4.80092e-06	2.51473e-05	false	1A
TraesCS1A02G238100	1.67	0.6	1.23	0.98	0.58	0.54	0.6	0.48	0.92	0.16	0.11	0.16	65	22	46	38	21	20	21	18	34	6	4	6	-0.38034	0.450484	0.521753	false	NA	NA	NA	NA	-2.80275	7.33655e-06	1.44444e-05	down	NA	NA	NA	NA	-0.705049	0.119919	0.200068	false	NA	NA	NA	NA	1A
TraesCS1A02G238400	9.29	6.06	7.47	3.04	7.48	4.52	4.63	3.78	6.28	0.97	1.17	1.6	89	55	69	29	67	41	40	35	57	9	11	15	-0.271327	0.48415	0.55431	false	-1.83403	0.000116991	0.000217336	down	-2.35642	1.04671e-07	2.33614e-07	down	0.202095	0.623749	0.674986	false	-0.532248	0.0999627	0.172279	false	-2.04731	5.42302e-05	0.000244926	down	1A
TraesCS1A02G238700	14.67	12.41	13.12	43.1	39.71	39.19	6.85	6.29	6.32	17.6	15.6	15.28	828	663	713	2420	2094	2095	348	343	338	963	860	844	1.95265	1.95383e-56	4.42448e-55	up	1.45496	4.87012e-43	3.62932e-42	up	0.524165	4.24339e-06	8.50437e-06	false	2.83249	6.44261e-138	4.52899e-136	up	-0.9412	4.78746e-15	5.53447e-14	false	-1.38594	3.17348e-40	1.71789e-38	down	1A
TraesCS1A02G238800	0.35	0.17	0.56	44.79	35.33	35.68	0.93	1.37	0.97	39.92	40.91	48.52	13	6	20	1651	1223	1252	31	49	34	1434	1481	1760	7.09196	8.08512e-141	6.85794e-139	up	5.4397	1.01746e-232	4.06167e-231	up	7.15187	4.95507e-169	2.10968e-167	up	5.32932	2.64458e-160	2.41539e-158	up	NA	NA	NA	NA	0.103043	0.413136	0.560435	false	1A
TraesCS1A02G239000	19.21	20.2	19.94	11.08	11.41	12.21	20.56	20	20.78	7.6	7.99	7.83	1493	1487	1493	857	829	899	1439	1503	1530	573	607	596	-0.423443	0.000223014	0.000519732	false	-1.25093	1.35463e-55	1.24985e-54	down	-1.08562	1.14316e-30	7.49194e-30	down	-0.63969	5.63107e-10	1.78616e-09	false	0.15475	0.0486848	0.0943782	false	-0.619818	3.80379e-08	2.48723e-07	false	1A
TraesCS1A02G239100	4.67	4.46	3.92	8.04	8.54	8.39	3.8	3.71	4.87	7.02	6.51	7.27	910	823	737	1560	1556	1549	668	700	899	1328	1240	1388	1.28573	9.50713e-28	9.76619e-27	up	0.886073	8.30422e-19	3.3735e-18	false	0.927875	9.88398e-20	4.34339e-19	false	1.19329	2.52797e-23	1.80637e-22	up	0.03148	0.794227	0.856337	false	-0.315772	0.000838407	0.0030457	false	1A
TraesCS1A02G239300	1.31	0.85	0.97	0.04	0	0	0.65	0.81	1.07	0.03	0.09	0.09	99	61	71	3	0	0	44	59	77	2	7	7	-5.89689	3.90338e-10	1.58378e-09	down	-3.40651	2.17022e-10	5.94735e-10	down	-3.60264	1.06381e-11	3.03938e-11	down	-5.75198	1.4415e-09	4.41759e-09	down	-0.2052	0.497115	0.61185	false	NA	NA	NA	NA	1A
TraesCS1A02G239400	1.86	2	2.85	4.7	4.13	3.87	2.67	2.44	2.62	3.8	4.46	4.63	153	156	226	385	318	302	198	194	204	303	359	373	1.27376	1.0087e-09	3.97367e-09	up	0.876527	2.92737e-09	7.51952e-09	false	1.19661	1.5673e-10	4.15119e-10	up	0.902891	1.48646e-07	3.92041e-07	false	0.30968	0.109003	0.185033	false	-0.0346869	0.826088	0.891636	false	1A
TraesCS1A02G239500	0.22	0.11	0.31	1.05	0.63	0.83	0.31	0.44	0.39	0.81	0.96	0.87	25	12	34	119	67	89	32	48	42	89	107	97	2.32184	1.23326e-08	4.45111e-08	up	1.34847	2.28538e-06	4.87343e-06	up	2.29181	2.37354e-10	6.21417e-10	up	1.32751	7.75366e-05	0.000161284	up	0.93259	0.0319892	0.0659537	false	0.0143448	0.958376	0.97497	false	1A
TraesCS1A02G239600	1.77	0.89	1.97	4.23	3.38	3.87	3.66	3.73	3.3	1.69	1.81	1.79	134	64	144	319	239	278	250	273	237	124	134	133	1.65864	3.3609e-10	1.37007e-09	up	-0.87779	2.5293e-07	5.76061e-07	false	0.441566	0.110774	0.138571	false	0.288212	0.103213	0.136931	false	1.30939	1.45828e-08	8.93132e-08	up	-1.17397	5.43597e-10	4.21175e-09	down	1A
TraesCS1A02G239700	5.64	3.47	5.35	3.85	3.44	3.53	8.9	9.01	9.6	2.73	2.18	2.53	390	227	356	265	222	231	554	602	629	183	147	171	-0.0693728	0.744553	0.790239	false	-1.7507	1.94226e-39	1.35118e-38	down	-0.707993	0.000602162	0.00100375	false	-1.16264	1.4633e-15	6.8456e-15	down	1.0324	5.85981e-11	4.52646e-10	up	-0.59637	0.00128737	0.00448879	false	1A
TraesCS1A02G240200	1.74	0.9	1.59	5.26	2.72	6.64	3.08	3.57	2.86	5.76	4.93	4.25	84	41	74	253	123	304	134	167	131	270	233	201	2.14939	6.39249e-11	2.75465e-10	up	0.787835	1.96209e-05	3.89778e-05	false	2.07328	1.06338e-16	4.03659e-16	up	0.811725	0.0032476	0.00556149	false	1.27511	9.74903e-07	4.89154e-06	up	-0.0300613	0.907092	0.944312	false	1A
TraesCS1A02G241000	51.54	54.34	54.06	14.59	19.48	18.63	44.35	43.93	46.13	12.4	11.31	12.44	3600	3595	3638	1014	1272	1233	2790	2968	3053	840	772	851	-1.25555	1.70292e-27	1.73065e-26	down	-1.75712	2.85219e-147	6.48265e-146	down	-1.88988	6.21661e-118	1.61404e-116	down	-1.17312	4.16053e-28	3.62916e-27	down	-0.143404	0.0344115	0.07023	false	-0.59342	6.30303e-07	3.6634e-06	false	1A
TraesCS1A02G241900	22.96	26.76	23.98	8.55	12.32	10.74	32.36	31.91	32.99	13.4	12.28	13.36	1988	2195	2001	737	997	881	2524	2673	2707	1125	1039	1133	-0.876216	1.70582e-11	7.6739e-11	false	-1.17982	5.7613e-72	6.54483e-71	down	-0.660622	2.52124e-13	7.95189e-13	false	-1.44563	9.92841e-37	1.14491e-35	down	0.508408	5.38592e-11	4.17354e-10	false	0.25608	0.0391422	0.0891206	false	1A
TraesCS1A02G242100	1.29	1.29	0.95	2.35	2.41	2.25	1.44	1.89	1.78	2.53	2.86	3.17	148	141	105	269	259	245	149	210	194	282	321	357	1.34047	8.51664e-11	3.63286e-10	up	0.879815	5.98123e-08	1.4182e-07	false	1.53266	1.76439e-16	6.62042e-16	up	0.636595	0.000577377	0.00108718	false	0.642272	0.00151869	0.0045018	false	0.234663	0.142275	0.253086	false	1A
TraesCS1A02G242300	1.29	1.57	1.47	0.44	0.28	0.44	1.28	1.36	1.41	0.39	0.32	0.27	196	226	216	66	40	63	175	201	203	57	48	41	-1.54787	7.48537e-09	2.74732e-08	down	-1.90421	1.10919e-16	4.1532e-16	down	-1.88062	8.65934e-15	2.96772e-14	down	-1.62283	2.66439e-10	8.65524e-10	down	0.0129797	0.938142	0.958978	false	-0.288735	0.408659	0.556152	false	1A
TraesCS1A02G242400	2.05	2.23	1.91	44.85	37.55	43.34	2.56	2.18	2.18	42.39	42.13	38.71	105	108	94	2285	1797	2102	118	108	106	2105	2108	1941	4.70094	1.82656e-204	3.20931e-202	up	4.2932	0	0	up	4.57292	6.21146e-300	6.91368e-298	up	4.36924	4.93589e-202	6.84454e-200	up	0.270229	0.221353	0.327292	false	-0.084507	0.425846	0.572587	false	1A
TraesCS1A02G242500	0.82	0.67	0.5	1.51	2.2	1.94	0.7	0.56	0.67	2.97	4.16	3.28	73	56	43	133	183	163	56	48	56	256	361	285	1.84665	3.07322e-11	1.35659e-10	up	2.57492	1.56411e-34	9.82345e-34	up	2.63983	5.95404e-31	3.936e-30	up	1.73044	3.02347e-11	1.06038e-10	up	0.055953	0.859102	0.903446	false	0.834824	2.38805e-05	0.00011367	false	1A
TraesCS1A02G242800	1	1.23	1.57	0.04	0.12	0.35	3.38	1.79	2.02	0.27	0.09	0.15	54	63	82	2	6	18	165	94	104	14	5	8	-2.5636	9.6288e-06	2.65654e-05	down	-3.67639	2.66119e-18	1.0612e-17	down	-2.63561	7.31394e-08	1.64786e-07	down	-3.65634	7.25159e-14	3.03542e-13	down	1.02884	0.000312433	0.00107071	up	NA	NA	NA	NA	1A
TraesCS1A02G243000	3.12	2.46	3.09	5.6	6.07	4.96	4.47	4.97	4.67	10.04	9.54	9.21	245	183	234	437	445	369	316	377	347	764	732	708	1.2844	3.39039e-13	1.71616e-12	up	1.16633	1.42266e-27	7.56214e-27	up	1.98359	2.17377e-47	2.09014e-46	up	0.416858	0.00473686	0.00792265	false	0.806732	1.42139e-07	7.85438e-07	false	0.740606	4.49255e-09	3.18562e-08	false	1A
TraesCS1A02G243700	8.38	10.05	8.31	4.87	5.52	4.31	7.51	7.11	8.19	3.65	3.6	3.33	1142	1297	1091	661	703	556	922	937	1058	483	480	445	-0.513779	0.000137277	0.000329563	false	-0.968958	3.65809e-23	1.7203e-22	false	-1.07891	1.31912e-21	6.29315e-21	down	-0.45428	0.000230289	0.000454612	false	-0.120706	0.23173	0.339254	false	-0.523656	6.43423e-05	0.000286674	false	1A
TraesCS1A02G244200	0.68	0.84	0.64	0.24	0.28	0.11	0.29	0.56	0.77	0.11	0	0.12	46	54	42	16	18	7	18	37	50	7	0	8	-1.43065	0.00513784	0.00963585	down	NA	NA	NA	NA	-2.99577	1.97482e-06	4.05651e-06	down	NA	NA	NA	NA	-0.288914	0.460785	0.577981	false	NA	NA	NA	NA	1A
TraesCS1A02G244300	0.14	0.19	0.1	14.93	12.34	11.43	0.73	0.46	0.42	11.44	13.67	12.25	7	9	5	741	575	540	33	22	20	553	666	598	6.83229	1.56111e-79	5.55192e-78	up	4.67764	2.02561e-106	3.32253e-105	up	6.68205	7.40155e-83	1.25665e-81	up	4.77551	1.76528e-88	6.12672e-87	up	NA	NA	NA	NA	-0.1069	0.450342	0.595211	false	1A
TraesCS1A02G244700	1.2	1.23	1.21	1.33	1.56	1.09	1.51	1.11	1.49	2.53	2.28	2.18	184	179	178	202	223	158	208	164	216	376	341	327	0.472239	0.0231447	0.0381806	false	0.907889	7.30604e-09	1.83204e-08	false	1.19626	4.78063e-14	1.5695e-13	up	0.133411	0.52059	0.578077	false	0.277888	0.122883	0.204047	false	0.764858	1.11195e-05	5.53795e-05	false	1A
TraesCS1A02G244900	2.96	2.56	2.5	4.59	3.05	3.65	1.67	2.5	1.94	2.62	2.35	2.1	290	237	236	447	279	339	147	237	180	249	225	201	0.851069	2.40715e-05	6.34214e-05	false	0.345608	0.0632233	0.0841873	false	0.07259	0.675947	0.714846	false	1.07253	4.17077e-07	1.0612e-06	up	-0.283346	0.122267	0.203239	false	-0.734147	0.000106409	0.000456851	false	1A
TraesCS1A02G245400	1.64	1.67	1.47	0.04	0.21	0.17	0.78	0.98	1.25	0.02	0.07	0	91	88	79	2	11	9	39	53	66	1	4	0	-3.18512	2.54399e-10	1.04733e-09	down	-4.8951	3.29977e-10	8.94862e-10	down	-5.44131	2.17575e-13	6.88793e-13	down	-2.68874	1.60337e-06	3.88727e-06	down	-0.555292	0.0509451	0.0980834	false	NA	NA	NA	NA	1A
TraesCS1A02G245600	3.29	3.2	2.91	5.08	5.73	6	3.68	3.95	3.65	10.76	10.05	10.34	291	268	248	447	473	502	293	338	306	922	868	895	1.18582	5.18905e-14	2.76207e-13	up	1.60096	1.04229e-54	9.47013e-54	up	1.9824	1.52611e-62	1.92691e-61	up	0.753545	1.76811e-07	4.63327e-07	false	0.370809	0.00908321	0.022102	false	0.838678	1.00066e-12	1.02858e-11	false	1A
TraesCS1A02G245700	0.68	0.79	0.76	0.29	0.3	0.22	0.65	0.47	0.61	0.19	0.21	0.27	142	156	153	60	59	44	121	94	120	39	43	54	-1.104	6.13992e-05	0.000153872	down	-1.22274	1.03039e-05	2.09235e-05	down	-1.4838	2.42538e-08	5.62627e-08	down	-0.893547	0.00202948	0.00357165	false	-0.272022	0.194336	0.295262	false	-0.338091	0.325696	0.471758	false	1A
TraesCS1A02G245800	1.03	0.59	1.22	0.2	0.23	0.08	0.81	0.56	0.46	0.07	0.02	0	57	31	65	11	12	4	40	30	24	4	1	0	-2.1407	0.000172213	0.000407616	down	NA	NA	NA	NA	-4.68526	1.11324e-08	2.63321e-08	down	NA	NA	NA	NA	-0.540781	0.169441	0.264801	false	NA	NA	NA	NA	1A
TraesCS1A02G246100	0.01	0	0.06	0.01	0.06	0.13	1.31	1.16	1.27	1.84	1.8	1.64	2	0	8	2	8	17	168	160	172	254	250	229	NA	NA	NA	NA	0.632739	9.83504e-05	0.000183783	false	6.44268	2.10161e-37	1.63834e-36	up	-4.05785	3.4353e-23	2.4399e-22	down	5.79947	1.4003e-29	4.37781e-28	up	4.68246	3.00105e-37	1.44633e-35	up	1A
TraesCS1A02G246200	0	0.08	0	0	0.04	0	10.53	8.02	11.36	5.82	4.59	4	0	2	0	0	1	0	237	194	269	141	112	98	NA	NA	NA	NA	-0.915114	6.5265e-06	1.34518e-05	false	7.70351	4.61869e-13	1.43377e-12	up	-9.19824	2.09868e-14	9.07564e-14	down	8.60799	1.41026e-16	1.8725e-15	up	8.2746	1.15045e-11	1.05818e-10	up	1A
TraesCS1A02G246300	0.43	0.21	0.4	0.4	0.41	0.37	1.32	1.65	1.31	0.38	0.68	0.69	37	17	33	34	33	30	102	137	107	32	57	58	NA	NA	NA	NA	-1.15252	5.29908e-05	0.000101486	down	1.00452	0.0189758	0.0266302	up	-1.68279	5.65919e-08	1.54025e-07	down	2.14706	3.33201e-12	2.93576e-11	up	0.521406	0.184425	0.308411	false	1A
TraesCS1A02G246400	6.6	7.72	7.17	30.28	33.36	31.56	5.84	6.25	5.46	49.65	51.92	49.53	453	502	474	2068	2140	2052	361	415	355	3305	3483	3329	2.49728	5.91653e-106	3.18694e-104	up	3.24283	0	0	up	3.0704	5.35515e-270	4.88088e-268	up	2.61905	5.99421e-130	3.8404e-128	up	-0.183445	0.145323	0.233764	false	0.614935	1.19749e-13	1.34438e-12	false	1A
TraesCS1A02G246600	3.17	3.03	2.73	7.8	7.15	6.55	4.02	4.1	3.85	9.53	10.43	9.64	265	240	220	649	559	519	303	332	305	773	852	789	1.61965	4.6157e-24	4.07557e-23	up	1.44219	4.12248e-42	3.02194e-41	up	1.98339	3.06043e-56	3.46341e-55	up	1.02722	7.99175e-13	3.12553e-12	up	0.530781	0.000254582	0.000887639	false	0.406545	0.000927743	0.0033388	false	1A
TraesCS1A02G246700	2.27	1.89	2.08	4.1	3.76	3.66	2.66	2.24	3.85	4.89	4.15	3.78	126	99	111	226	195	192	133	120	202	263	225	205	1.23536	1.72852e-08	6.17219e-08	up	0.690378	0.000730192	0.00125613	false	1.29357	1.40571e-10	3.73571e-10	up	0.581695	0.00994682	0.0158746	false	0.593128	0.0104407	0.0249628	false	0.100584	0.582227	0.709717	false	1A
TraesCS1A02G246800	10.69	12.96	11.65	2.73	2.8	3.63	6.92	7.62	7.23	2.16	2.4	1.8	739	849	776	188	181	238	431	510	474	145	162	122	-1.59304	1.3423e-21	1.06597e-20	down	-1.63867	5.42093e-28	2.91344e-27	down	-2.21548	8.8779e-50	8.94904e-49	down	-1.0673	1.86415e-10	6.1311e-10	down	-0.587429	1.85527e-07	1.01265e-06	false	-0.579698	0.0058099	0.0172563	false	1A
TraesCS1A02G247100	1.41	1.05	1.22	2.57	2.37	1.85	2.11	2.47	2.86	3.24	2.82	2.72	160	113	133	290	251	199	215	271	307	356	312	302	1.23286	2.60967e-08	9.1902e-08	up	0.375645	0.0136059	0.0200642	false	1.50597	1.32818e-16	5.01676e-16	up	0.0521785	0.786294	0.821102	false	1.11999	2.1546e-09	1.42703e-08	up	0.315198	0.0709742	0.145187	false	1A
TraesCS1A02G247200	6.51	6.19	8.06	5.36	6.45	6.41	1.85	1.82	1.56	1.62	1.29	2.04	273	246	326	224	253	255	70	74	62	66	53	84	0.15912	0.399036	0.471149	false	0.0587715	0.838511	0.86286	false	-1.81149	1.37639e-15	4.93582e-15	down	1.97918	6.71445e-20	4.05383e-19	up	-1.88119	1.51228e-20	2.74578e-19	down	-1.92949	7.27592e-18	1.21464e-16	down	1A
TraesCS1A02G247800	0.88	0.88	1.39	1.57	1.28	1.22	2.47	2.35	3.87	1.86	2.15	2.06	71	67	108	126	96	93	179	183	295	145	169	162	0.720987	0.0157367	0.0269223	false	-0.381067	0.0622981	0.083064	false	1.19734	1.32149e-06	2.74666e-06	up	-0.907599	0.00022851	0.000451247	false	1.56825	1.66028e-10	1.22791e-09	up	0.518897	0.0208173	0.0524197	false	1A
TraesCS1A02G248000	1.41	1.41	0	6.94	6.43	7.37	1.48	1.54	1.8	9.88	11.24	10.54	19	18	0	93	81	94	18	20	23	129	148	139	3.23442	0.0064954	0.01196	up	2.8518	5.6007e-22	2.53453e-21	up	3.7459	0.00155584	0.00248507	up	2.28787	1.01399e-10	3.40408e-10	up	NA	NA	NA	NA	0.556121	0.0162442	0.0424347	false	1A
TraesCS1A02G248100	0.35	0.33	0.36	1.33	0.98	1.93	0.91	0.66	0.69	1.14	1.2	1.66	32	29	32	122	85	169	76	59	60	102	108	150	2.38853	3.35685e-12	1.58883e-11	up	0.960994	0.000223135	0.000403657	false	2.19889	5.02403e-13	1.5569e-12	up	1.09834	0.000332648	0.000644119	up	1.22773	0.000207888	0.000735633	up	-0.145108	0.59978	0.724181	false	1A
TraesCS1A02G248300	29.03	27.69	29.23	5	4.76	6.1	28.52	25.97	24.67	3.18	3.11	3.02	1337	1208	1297	229	205	266	1183	1157	1077	142	140	136	-2.08715	7.77388e-46	1.37448e-44	down	-2.95127	2.10485e-137	4.45311e-136	down	-2.95261	1.11081e-122	3.04641e-121	down	-2.13702	2.40952e-52	4.15522e-51	down	-0.0120255	0.894519	0.928441	false	-0.822837	2.17243e-05	0.000103979	false	1A
TraesCS1A02G248400	5.34	6.37	4.94	7.12	8.44	8.6	4.34	3.87	4.01	10.06	8.85	9.22	683	772	609	906	1009	1042	500	479	486	1248	1106	1155	0.886287	7.96714e-11	3.40733e-10	false	1.34075	8.11339e-47	6.47334e-46	up	1.01318	1.72117e-19	7.48512e-19	up	1.16292	1.57331e-21	1.03028e-20	up	-0.33834	0.00486948	0.0127716	false	0.168616	0.124765	0.228106	false	1A
TraesCS1A02G249000	8.86	6.61	7.16	3.34	2.68	2.43	7.29	8.18	6.89	1.61	1.27	1.48	875	618	681	328	247	227	648	781	645	154	123	143	-1.06999	3.92882e-09	1.47367e-08	down	-2.22138	7.49393e-58	7.13617e-57	down	-2.12193	2.31068e-38	1.84116e-37	down	-1.22048	2.93761e-14	1.25977e-13	down	0.0889914	0.483772	0.599498	false	-1.00905	4.7411e-07	2.79657e-06	down	1A
TraesCS1A02G249300	4.75	4.63	4.43	1.61	0.99	1.04	4.31	4.89	3.12	1.07	0.97	1.56	246	227	221	83	48	51	201	245	153	54	49	79	-1.56316	2.8116e-09	1.06798e-08	down	-1.63838	4.61227e-11	1.31376e-10	down	-1.68399	7.07066e-13	2.17112e-12	down	-1.56933	1.71689e-08	4.86331e-08	down	-0.0564846	0.75916	0.830091	false	-0.077027	0.8225	0.889446	false	1A
TraesCS1A02G249700	0	0	0	0	0.21	0	6.38	7.69	6.47	0	0	0	0	0	0	0	9	0	264	342	282	0	0	0	NA	NA	NA	NA	-10.5686	8.00987e-19	3.25681e-18	down	NA	NA	NA	NA	-6.48992	6.08994e-05	0.000128152	down	10.8052	1.25649e-19	2.13895e-18	up	NA	NA	NA	NA	1A
TraesCS1A02G250100	13.84	13.73	13.7	6.82	5.69	6.5	6.75	6.75	7.72	0.67	0.46	0.6	708	665	675	347	272	315	311	334	374	33	23	30	-0.764335	5.8364e-07	1.82412e-06	false	-3.4841	9.48749e-54	8.47818e-53	down	-4.32604	1.44639e-96	2.95609e-95	down	0.0265245	0.87045	0.8932	false	-0.852274	2.51434e-13	2.47485e-12	false	-3.51868	1.54695e-46	1.05174e-44	down	1A
TraesCS1A02G250300	22.43	26.76	22.01	24.28	30.16	31.59	17.84	19.63	17	39.39	40.83	39.65	607	686	574	654	763	810	435	514	436	1034	1080	1051	0.621951	1.54186e-05	4.15148e-05	false	1.27439	2.34985e-41	1.69749e-40	up	1.0084	2.96625e-21	1.3949e-20	up	0.83719	1.01587e-09	3.15185e-09	false	-0.27691	0.0225467	0.048793	false	0.428216	0.000258907	0.00103981	false	1A
TraesCS1A02G250700	0.61	0.55	0.26	0.1	0.33	0.19	1.07	0.56	0.78	0.12	0.17	0.11	59	50	24	10	30	17	93	52	71	11	16	10	-0.855392	0.112432	0.157131	false	-2.47183	6.20639e-09	1.56214e-08	down	-1.59429	0.00228616	0.00358581	down	-1.7824	6.86662e-05	0.000143729	down	0.866441	0.0154138	0.0351167	false	NA	NA	NA	NA	1A
TraesCS1A02G251100	3.24	4.12	4.57	4.8	6.01	6.17	2.84	2.64	3.77	5.17	4.94	5.69	227	273	308	334	393	409	179	179	250	351	338	390	0.856861	2.78435e-06	8.12461e-06	false	0.909959	8.52774e-09	2.12944e-08	false	0.66225	4.3136e-05	7.97611e-05	false	1.05449	6.6235e-09	1.93651e-08	up	-0.258497	0.160474	0.253328	false	-0.153355	0.306898	0.452169	false	1A
TraesCS1A02G251200	77.23	62.57	73.77	49.7	44.2	47.65	105.6	104.18	101.29	15.7	15.21	15.07	3971	3047	3654	2543	2124	2321	4890	5181	4935	783	764	759	-0.241928	0.0499052	0.0762337	false	-2.62078	0	0	down	-1.96177	4.54053e-87	8.17403e-86	down	-0.95197	1.30987e-23	9.45985e-23	false	0.648647	3.3283e-14	3.54625e-13	false	-1.67698	1.39416e-60	1.46362e-58	down	1A
TraesCS1A02G251400	12.6	10.66	9.22	27.86	25.4	27.3	10.36	12.02	12.26	31.26	30.29	32.42	1458	1168	1028	3208	2747	2992	1080	1345	1344	3507	3425	3673	1.66238	1.94514e-36	2.65879e-35	up	1.57611	7.31318e-112	1.2624e-110	up	1.78672	1.70518e-67	2.31479e-66	up	1.40076	3.29245e-39	4.07859e-38	up	0.200123	0.0823442	0.146519	false	0.167412	0.0606256	0.12796	false	1A
TraesCS1A02G251700	5.19	5.23	4.88	4.72	6.33	4.88	4.9	5.62	5.28	9.23	8.6	8.37	926	884	839	838	1056	826	788	970	893	1598	1501	1464	0.403553	0.00217857	0.00436898	false	0.866855	4.44459e-26	2.27279e-25	false	1.03258	3.93141e-29	2.45977e-28	up	0.187777	0.137074	0.177115	false	0.155021	0.113758	0.191528	false	0.669596	7.57121e-09	5.26601e-08	false	1A
TraesCS1A02G251900	0.05	0	0.02	2.54	2.52	1.79	0.02	0.31	0.11	1.95	0.67	2.57	3	0	1	143	133	96	1	17	6	107	37	142	6.90491	1.88836e-18	1.29044e-17	up	3.67658	0.00027877	0.000500055	up	6.409	3.08008e-14	1.02267e-13	up	4.11188	7.99045e-19	4.53397e-18	up	NA	NA	NA	NA	-0.456278	0.192589	0.318712	false	1A
TraesCS1A02G252700	38.95	38.62	44.59	9.95	9.35	11.12	47.13	48.03	45.38	6.67	6.89	7.66	1885	1770	2079	479	423	510	2054	2248	2081	313	326	363	-1.65384	1.34275e-35	1.79061e-34	down	-2.59005	6.50508e-201	2.14344e-199	down	-2.27026	2.02479e-95	4.08608e-94	down	-2.0248	1.34247e-71	3.51153e-70	down	0.30931	0.000256109	0.000892539	false	-0.573824	7.46836e-05	0.000328875	false	1A
TraesCS1A02G253200	10.74	9.62	9.68	36.35	39.95	40.76	15.3	14.54	14.6	70.37	65.74	66.65	1427	1211	1240	4808	4963	5133	1831	1869	1839	9071	8540	8675	2.31091	6.95711e-108	3.87106e-106	up	2.32772	0	0	up	3.00943	0	0	up	1.57827	2.65408e-74	7.2744e-73	up	0.671338	1.53483e-15	1.85515e-14	false	0.740507	1.20734e-20	2.51739e-19	false	1A
TraesCS1A02G253400	60.12	52.36	59.39	97.6	103.01	98.26	67.56	64.95	68.22	139.94	132.84	131.56	9281	7656	8833	14994	14863	14371	9393	9698	9979	20951	20041	19888	1.14673	5.18711e-31	5.95887e-30	up	1.14794	7.43803e-159	1.83535e-157	up	1.48856	1.84643e-86	3.29576e-85	up	0.755505	2.31704e-24	1.72951e-23	false	0.33022	6.74081e-06	3.02802e-05	false	0.383685	1.05095e-07	6.5696e-07	false	1A
TraesCS1A02G253900	11.33	12.05	10.97	2.53	1.77	3.19	8.07	9.82	8.85	1.83	2.31	2.45	953	960	889	212	139	254	611	799	705	149	190	202	-1.83954	6.56051e-22	5.28241e-21	down	-1.88358	1.70446e-42	1.25747e-41	down	-2.12611	8.05464e-55	8.90986e-54	down	-1.64881	6.44096e-18	3.47923e-17	down	-0.25285	0.0165269	0.037325	false	-0.242282	0.295063	0.439087	false	1A
TraesCS1A02G254000	18.43	19.91	17.95	5.12	5.12	4.23	16.22	17.68	18.34	4.97	4.43	4.94	1422	1455	1334	393	369	309	1127	1319	1341	372	334	373	-1.60941	1.56283e-33	1.96013e-32	down	-1.72821	1.27687e-70	1.42848e-69	down	-1.71708	6.64672e-58	7.7495e-57	down	-1.67114	7.3024e-40	9.219e-39	down	0.000521403	0.995283	0.99701	false	-0.0657052	0.66042	0.772327	false	1A
TraesCS1A02G254100	7.32	6.42	7.76	4.04	2.97	3.76	5.04	4.49	4.28	2.52	3.25	2.51	593	493	606	326	225	289	368	352	329	198	257	199	-0.641219	0.000344396	0.000781991	false	-0.602068	8.93246e-05	0.00016751	false	-1.12394	5.55493e-13	1.7167e-12	down	-0.170905	0.334184	0.392584	false	-0.532397	4.05414e-05	0.000162198	false	-0.438705	0.0220407	0.0550464	false	1A
TraesCS1A02G254200	15.23	17.73	15.3	29.9	40.66	33.02	11.32	11.15	10.5	29.26	26.35	28.67	2363	2605	2287	4617	5896	4854	1582	1673	1544	4403	3995	4356	1.44775	2.50784e-36	3.41766e-35	up	1.49127	2.54131e-126	4.9257e-125	up	1.06094	9.93315e-39	7.98271e-38	up	1.82771	6.19381e-69	1.54115e-67	up	-0.441184	1.35556e-07	7.50824e-07	false	-0.346351	0.000629232	0.00234321	false	1A
TraesCS1A02G254400	45.98	51.46	50.7	12.13	12.59	11.56	55.61	53.26	55.03	10.44	11.29	10.64	3035	3217	3224	797	777	723	3306	3400	3442	668	728	688	-1.67879	2.94403e-54	6.38045e-53	down	-2.20268	1.13289e-240	4.72488e-239	down	-1.93846	9.73363e-111	2.335e-109	down	-1.99378	2.06912e-102	8.93193e-101	down	0.253577	0.000381661	0.00128397	false	-0.217596	0.0515152	0.111839	false	1A
TraesCS1A02G254500	0.78	1.16	0.84	1.66	1.47	0.83	0.82	1.02	1.06	0.53	0.66	0.62	101	142	105	214	177	102	96	127	130	67	83	79	0.864119	0.00227232	0.00454556	false	-0.540069	0.0245609	0.0348956	false	-0.358374	0.175829	0.211913	false	0.631656	0.0179412	0.0274427	false	0.171095	0.456607	0.574085	false	-1.18007	1.84388e-05	8.912e-05	down	1A
TraesCS1A02G254800	0	0	0	0.84	0.69	1.05	0	0	0	0.46	0.32	0.98	0	0	0	43	33	51	0	0	0	23	16	49	8.21714	1.62094e-10	6.77527e-10	up	NA	NA	NA	NA	NA	NA	NA	NA	7.9995	4.39291e-10	1.40516e-09	up	NA	NA	NA	NA	-0.611701	0.184759	0.308823	false	1A
TraesCS1A02G255100	30.23	26.63	27.89	282.02	202.5	197.72	44.75	46.98	47.49	307.73	290.63	282.13	1394	1163	1239	12939	8726	8636	1858	2095	2075	13760	13095	12738	3.36469	8.44978e-118	5.45778e-116	up	2.7981	0	0	up	3.63126	0	0	up	2.48026	1.09244e-79	3.29617e-78	up	0.822643	4.47465e-22	9.03519e-21	false	0.31052	0.0128308	0.0346756	false	1A
TraesCS1A02G255400	8.07	8.69	8.74	31.25	32.05	30.89	10.53	9.76	10.86	35.23	33.4	34.13	848	865	885	3269	3149	3076	997	992	1082	3592	3431	3513	2.23605	1.79926e-103	9.3587e-102	up	1.85984	3.67176e-187	1.10766e-185	up	2.26688	2.67464e-178	1.23366e-176	up	1.77829	1.43265e-82	4.57492e-81	up	0.396414	2.13567e-05	8.91943e-05	false	0.0728533	0.362883	0.510751	false	1A
TraesCS1A02G255800	1.46	1.03	0.87	15.68	12.13	11.59	3.31	3.48	3.89	15.72	14.51	16.28	176	117	101	1877	1364	1320	359	405	443	1834	1705	1918	3.9033	3.30148e-95	1.5239e-93	up	2.25919	4.59532e-143	1.01056e-141	up	4.04172	2.96907e-180	1.38946e-178	up	2.06911	6.73044e-47	1.02018e-45	up	1.77268	1.79239e-22	3.71994e-21	up	0.182594	0.144923	0.256692	false	1A
TraesCS1A02G256800	0.56	1.02	0.59	0.62	0.93	0.69	0.33	0.47	0.37	0.78	0.6	0.57	54	94	55	60	84	63	29	44	34	73	57	54	0.391163	0.256614	0.323319	false	0.867554	0.0103313	0.0154853	false	0.104521	0.754754	0.786157	false	1.10388	0.00172211	0.00305863	up	-0.774654	0.0270355	0.0571261	false	-0.246415	0.425825	0.572587	false	1A
TraesCS1A02G257000	1.24	0.96	1.12	0.38	0.77	0.25	2.67	2.35	2.59	0.31	0.31	0.47	78	57	68	24	45	15	151	143	154	19	19	29	-0.912474	0.0357195	0.056483	false	-2.66162	7.90847e-20	3.33612e-19	down	-1.35147	0.000493122	0.000829189	down	-2.27106	1.91529e-11	6.81561e-11	down	1.29975	8.59919e-09	5.39108e-08	up	NA	NA	NA	NA	1A
TraesCS1A02G257100	8.09	8.35	3.57	1.31	4.88	0.98	5.68	3.75	4.52	1.63	1.71	1.42	87	85	37	14	49	10	55	39	46	17	18	15	-1.15896	0.0308356	0.0494623	down	-1.4086	0.000909887	0.00154766	down	-1.81257	4.51045e-05	8.32693e-05	down	-0.803795	0.130306	0.169224	false	-0.415093	0.239016	0.347692	false	NA	NA	NA	NA	1A
TraesCS1A02G257200	0.06	0	0.08	2.9	2.75	1.88	0.21	0.17	0.13	4.11	4.68	3.99	5	0	6	239	213	148	16	14	10	330	379	324	6.1338	9.46852e-33	1.15516e-31	up	4.77114	1.65532e-64	1.71693e-63	up	6.80078	4.61219e-47	4.40553e-46	up	4.05227	1.16145e-32	1.1908e-31	up	NA	NA	NA	NA	0.708878	0.00014957	0.000627072	false	1A
TraesCS1A02G257300	4.66	3.69	3.91	16.65	16.22	14.13	5.79	4.58	4.88	20.85	20.82	21.88	494	371	400	1758	1609	1420	553	470	491	2146	2159	2274	2.28766	1.55462e-61	3.96281e-60	up	2.19841	9.36914e-147	2.11979e-145	up	2.6274	4.9438e-140	1.60962e-138	up	1.8071	6.90638e-48	1.07145e-46	up	0.419486	0.00210848	0.00604035	false	0.382074	9.54996e-05	0.000413525	false	1A
TraesCS1A02G257400	0	0.02	0	35.51	28.59	29.4	0.01	0.02	0.01	34.99	34.23	36.62	0	2	0	3434	2597	2707	1	2	1	3298	3251	3485	12.4604	9.7549e-34	1.23476e-32	up	11.374	1.41766e-55	1.30719e-54	up	12.5397	1.64218e-34	1.19268e-33	up	11.2435	3.12073e-53	5.49721e-52	up	NA	NA	NA	NA	0.122631	0.248718	0.386754	false	1A
TraesCS1A02G257500	4.48	3.38	5.52	2.24	1.23	2.19	4.47	4.76	3.77	1.41	2.04	2.21	207	148	246	103	53	96	186	213	165	63	92	100	-0.883424	0.00265847	0.00524832	false	-1.06495	1.65103e-06	3.55774e-06	down	-0.991092	9.693e-05	0.000173824	false	-1.00943	0.000150584	0.000303591	down	0.0637645	0.751358	0.82425	false	-0.0627442	0.840608	0.900882	false	1A
TraesCS1A02G258000	2.04	2.31	2.35	0.67	0.95	1.01	3.32	2.49	2.52	1.16	0.88	0.74	203	217	225	66	88	95	297	239	237	112	85	72	-1.0063	2.8505e-05	7.44907e-05	down	-1.44475	5.92537e-12	1.77449e-11	down	-1.01399	6.32564e-06	1.25168e-05	down	-1.48739	8.13807e-11	2.75335e-10	down	0.419393	0.0125189	0.029272	false	0.0332358	0.907523	0.94449	false	1A
TraesCS1A02G258300	4.53	3.94	3.9	1.65	1.47	1.69	4.19	4.91	4.21	0.67	0.59	0.85	638	526	530	231	194	225	532	670	562	91	81	118	-1.01233	1.4679e-09	5.70484e-09	down	-2.52204	3.26132e-56	3.03914e-55	down	-2.29815	2.88399e-39	2.3487e-38	down	-1.28752	1.35608e-16	6.76836e-16	down	0.213529	0.0762084	0.137272	false	-1.24323	9.27182e-09	6.40515e-08	down	1A
TraesCS1A02G258800	2.8	2.77	3.33	1.58	1.22	1.77	4.75	4.61	4.12	1.63	1.66	1.12	207	194	237	116	84	124	316	329	288	117	120	81	-0.608481	0.0109344	0.0193039	false	-1.47163	1.61878e-15	5.75866e-15	down	-0.757004	0.000604573	0.00100752	false	-1.37449	2.59097e-11	9.13548e-11	down	0.703849	5.32606e-06	2.42318e-05	false	-0.10488	0.691923	0.795998	false	1A
TraesCS1A02G258900	5.55	4.71	5.26	2.55	1.29	1.78	3.75	2.12	6.88	2.36	1.6	5.79	46	37	42	21	10	14	28	17	54	19	13	47	-1.10443	0.030425	0.048874	down	-0.245862	0.648425	0.69166	false	-0.416552	0.393262	0.441206	false	NA	NA	NA	NA	-0.180421	0.671011	0.761557	false	NA	NA	NA	NA	1A
TraesCS1A02G259000	5.09	6.21	5.97	11.81	15.58	14.69	6.1	5.82	5.76	17.19	16.13	14.34	275	318	311	635	787	752	297	304	295	901	852	759	1.63161	1.12857e-26	1.1084e-25	up	1.56875	5.05336e-45	3.90594e-44	up	1.72128	4.51119e-41	3.81101e-40	up	1.4287	1.37435e-24	1.0363e-23	up	0.141658	0.320507	0.437696	false	0.13064	0.30449	0.449455	false	1A
TraesCS1A02G259100	52	53.03	53.57	86.29	67.63	70.89	81.86	77.67	71.93	113.27	141.57	115.69	2963	2862	2941	4893	3602	3827	4201	4281	3884	6260	7884	6456	0.858705	5.04897e-12	2.3647e-11	false	0.816395	2.93786e-27	1.5492e-26	false	1.47966	5.90063e-63	7.49382e-62	up	0.1439	0.212892	0.262958	false	0.652694	4.63027e-19	7.55256e-18	false	0.664842	2.19598e-08	1.46801e-07	false	1A
TraesCS1A02G259300	1.28	1.28	2.12	0.47	0.22	0.3	0.95	1.19	1.58	0.37	0.26	0.57	82	78	131	30	13	18	55	74	96	23	16	36	-1.88878	6.58678e-06	1.84844e-05	down	-1.49964	6.778e-05	0.00012853	down	-1.71237	7.52205e-06	1.47977e-05	down	-1.72698	3.58067e-05	7.69947e-05	down	-0.222397	0.441941	0.560005	false	NA	NA	NA	NA	1A
TraesCS1A02G259400	6.13	7.4	8.03	2.53	3.79	3.36	6.02	5.25	6.73	2.17	3.22	3.09	355	406	448	146	205	184	314	294	369	122	182	175	-0.811817	3.02836e-05	7.88974e-05	false	-0.948	7.30451e-08	1.72244e-07	false	-1.09125	3.45628e-09	8.42807e-09	down	-0.718811	0.000138437	0.000280397	false	-0.153594	0.296345	0.411746	false	-0.238675	0.282007	0.424733	false	1A
TraesCS1A02G259500	1.64	1.89	1.81	0.41	0.63	0.56	1.4	1.46	1.49	0.73	0.78	0.57	276	302	294	69	99	90	213	238	239	119	128	94	-1.39132	3.46216e-10	1.40999e-09	down	-0.934002	5.72997e-07	1.27413e-06	false	-1.10752	8.51913e-09	2.02974e-08	down	-1.26803	7.96588e-09	2.31395e-08	down	-0.184058	0.215144	0.320096	false	0.32466	0.215118	0.346614	false	1A
TraesCS1A02G259700	24.55	18.8	22.96	16.6	15.1	18.19	41.5	42.33	40.46	12.86	12.41	14.31	990	718	892	666	569	695	1507	1651	1546	503	489	565	-0.059732	0.696065	0.748561	false	-1.51372	1.39304e-70	1.55699e-69	down	-0.491351	0.000151889	0.000267543	false	-1.13336	2.03609e-22	1.39326e-21	down	1.0121	6.25466e-22	1.25093e-20	up	-0.388726	0.00321801	0.0102339	false	1A
TraesCS1A02G259900	0.26	0.22	0.32	0.45	0.54	0.64	0.41	0.42	0.42	0.51	0.39	0.36	38	31	45	66	75	90	55	60	59	73	56	52	1.38705	6.78886e-05	0.000169309	up	0.139623	0.641506	0.685115	false	0.915024	0.00972265	0.0141918	false	0.561287	0.0645765	0.08925	false	0.764724	0.0187438	0.0416435	false	-0.430588	0.156023	0.271586	false	1A
TraesCS1A02G260300	13.16	11.63	13.86	4.51	5.31	6.67	12.27	13.74	12.66	6.43	6.96	7.17	873	731	886	298	329	419	733	882	796	414	451	466	-0.881694	1.07238e-07	3.58407e-07	false	-0.774591	5.03143e-14	1.67061e-13	false	-0.65641	6.3211e-08	1.42967e-07	false	-1.05069	4.1373e-12	1.54249e-11	down	0.107813	0.314613	0.43154	false	0.267379	0.0941747	0.182514	false	1A
TraesCS1A02G260700	3.65	1.86	3.6	3.54	2.63	2.93	4.63	4.5	5.09	2.18	1.77	2.32	199	96	189	192	134	151	227	237	263	115	94	124	0.348684	0.209361	0.271138	false	-1.04464	1.34507e-08	3.31447e-08	down	-0.290101	0.282362	0.327192	false	-0.45673	0.0225113	0.0338374	false	0.744576	0.000687153	0.00219213	false	-0.595773	0.009768	0.0272927	false	1A
TraesCS1A02G260900	35.06	44.29	39.39	43.27	55.24	52.81	26.61	26.86	25.62	51.56	49.44	51.4	2528	3024	2736	3104	3722	3607	1728	1873	1750	3605	3483	3629	0.697799	2.58958e-09	9.86824e-09	false	1.0835	9.94312e-80	1.23312e-78	up	0.616911	4.88364e-13	1.51424e-12	false	1.11384	3.84359e-29	3.4963e-28	up	-0.477547	5.95444e-08	3.42731e-07	false	-0.0397035	0.67327	0.781609	false	1A
TraesCS1A02G261400	1.85	2.64	2.66	5.39	4.63	5.12	1.83	1.36	1.77	6.61	7.36	7.12	153	207	212	444	358	401	136	109	139	530	595	577	1.43809	6.82982e-14	3.61327e-13	up	2.22759	8.03026e-54	7.18459e-53	up	1.81797	1.57637e-31	1.0598e-30	up	1.79644	1.60731e-22	1.10621e-21	up	-0.420212	0.0435096	0.0858013	false	0.422829	0.00186083	0.00625719	false	1A
TraesCS1A02G261800	2.35	2.02	2.11	10.41	7.63	6.6	2.12	1.8	2	7	7.41	6.91	154	125	133	678	467	409	125	114	124	444	474	443	2.28222	2.05762e-28	2.16685e-27	up	1.98703	1.74996e-41	1.26798e-40	up	1.97215	1.65025e-36	1.26223e-35	up	2.24531	2.56642e-29	2.34825e-28	up	-0.0247428	0.903402	0.935215	false	-0.266339	0.112695	0.210423	false	1A
TraesCS1A02G262100	28.99	27.43	30.82	13.74	10.25	12.24	41.76	41.04	40.7	11.11	8.68	8.61	1722	1543	1764	812	569	689	2234	2358	2291	640	504	501	-0.912158	2.77489e-10	1.13858e-09	false	-1.98303	7.2414e-107	1.19303e-105	down	-1.36396	6.44826e-32	4.38459e-31	down	-1.58233	1.6585e-36	1.90168e-35	down	0.608279	1.97416e-14	2.15689e-13	false	-0.408302	0.00755485	0.0217864	false	1A
TraesCS1A02G263000	52.06	47.51	54.91	18.54	15.77	18.85	39.13	36.7	36.13	11.91	13.03	11.59	3178	2747	3229	1126	900	1090	2151	2167	2090	705	777	693	-1.1859	1.0656e-20	8.12146e-20	down	-1.4783	8.41879e-83	1.08071e-81	down	-1.82589	1.09499e-82	1.85239e-81	down	-0.889597	3.73159e-15	1.69963e-14	false	-0.358035	1.22168e-05	5.2859e-05	false	-0.596671	9.93188e-07	5.64556e-06	false	1A
TraesCS1A02G263200	1	1.64	0.88	2.18	1.89	2.28	1.03	0.85	0.94	1.21	1.11	1.25	123	190	104	266	217	265	114	101	109	144	133	150	1.21119	5.60516e-07	1.75426e-06	up	0.477804	0.0202503	0.0291151	false	0.280376	0.253822	0.296878	false	1.35693	3.37623e-11	1.17981e-10	up	-0.208501	0.396426	0.515601	false	-0.887205	2.44455e-06	1.32923e-05	false	1A
TraesCS1A02G263300	21.63	22.4	22.4	53.38	54.75	67.01	21.18	22.9	20.65	74.23	76.36	69.45	831	815	829	2041	1966	2439	733	851	752	2766	2867	2613	1.75012	4.08052e-44	6.92036e-43	up	1.90192	2.87996e-148	6.61891e-147	up	1.98364	4.21199e-123	1.1609e-121	up	1.61744	2.52791e-42	3.41043e-41	up	0.0709942	0.468061	0.58489	false	0.276222	0.00926765	0.0260483	false	1A
TraesCS1A02G263400	0.35	0.4	0.4	0.06	0.1	0.17	0.21	0.16	0.24	0.03	0.12	0.07	48	52	53	8	13	22	26	21	31	4	16	10	-1.46069	0.00363952	0.0070205	down	NA	NA	NA	NA	-2.1058	4.52201e-05	8.34702e-05	down	NA	NA	NA	NA	-0.816556	0.0269109	0.0568975	false	NA	NA	NA	NA	1A
TraesCS1A02G263600	0.53	0.8	1.02	10.05	8.13	8.74	0.9	0.75	0.66	5.04	5.02	4.93	33	47	61	620	471	513	50	45	39	303	304	299	3.87298	1.94906e-65	5.34688e-64	up	2.83713	2.87439e-44	2.19106e-43	up	2.92871	2.3543e-38	1.87519e-37	up	3.7302	5.87188e-72	1.55196e-70	up	0.0806385	0.81941	0.87492	false	-0.901141	8.10925e-10	6.15932e-09	false	1A
TraesCS1A02G263700	1.5	1.58	1.72	34.94	30.93	30.86	3.34	2.85	3.23	36.85	40.44	37.45	93	93	103	2160	1796	1816	187	171	190	2220	2455	2278	4.68664	6.44398e-210	1.17779e-207	up	3.74612	0	0	up	4.83541	0	0	up	3.54604	4.61664e-165	4.48641e-163	up	1.07918	4.8569e-08	2.82133e-07	up	0.191592	0.0549334	0.117928	false	1A
TraesCS1A02G264300	3.43	3.6	3.33	0.29	0.58	0.64	3.19	2.87	3.03	0.46	0.87	0.39	153	152	143	13	24	27	128	124	128	20	38	17	-2.43924	1.04281e-12	5.10815e-12	down	-2.26049	9.06321e-13	2.83029e-12	down	-2.33114	4.83622e-13	1.50007e-12	down	-2.41926	1.11219e-12	4.30454e-12	down	-0.0812583	0.674622	0.764374	false	NA	NA	NA	NA	1A
TraesCS1A02G264400	1.45	1.76	1.59	0.34	0.4	0.15	1.96	2.2	2.43	0.61	0.38	0.32	133	153	141	31	34	13	162	196	212	54	34	29	-2.09172	2.59197e-09	9.87667e-09	down	-2.19923	2.55611e-17	9.82956e-17	down	-1.61965	4.97128e-08	1.13174e-07	down	-2.72034	2.47564e-18	1.36719e-17	down	0.5689	0.0022015	0.00627995	false	NA	NA	NA	NA	1A
TraesCS1A02G264500	7.93	6.64	5.52	1.44	1.56	1.03	2.93	3.8	4.39	0.68	0.51	0.74	505	401	339	91	93	62	168	234	265	42	32	46	-1.97222	1.94437e-18	1.32733e-17	down	-2.3886	4.74041e-22	2.14913e-21	down	-3.12518	1.66784e-42	1.45772e-41	down	-1.28621	1.35176e-07	3.57664e-07	down	-0.746372	2.12661e-05	8.88603e-05	false	-1.11138	0.000662217	0.00245468	down	1A
TraesCS1A02G264900	37.23	36.1	37.85	20.89	20.51	19.4	34.04	31.8	32.07	13.88	13.31	13.07	1789	1643	1752	999	921	883	1473	1478	1460	647	625	615	-0.520234	4.39042e-06	1.25443e-05	false	-1.14424	1.50703e-45	1.17504e-44	down	-1.21032	1.57724e-38	1.26237e-37	down	-0.504999	1.06289e-06	2.61522e-06	false	-0.0766787	0.336223	0.454032	false	-0.647859	4.56918e-09	3.23834e-08	false	1A
TraesCS1A02G265200	1.29	2.03	1.05	3.32	4.13	3.52	1.47	1.91	2.07	0.88	1.11	0.93	71	106	56	182	213	184	73	102	108	47	60	50	1.67888	1.76882e-10	7.37301e-10	up	-0.764637	0.00633773	0.0097743	false	-0.323236	0.331927	0.379142	false	1.1861	1.33146e-07	3.52463e-07	up	0.430616	0.12742	0.210207	false	-1.96025	1.83064e-16	2.6766e-15	down	1A
TraesCS1A02G265600	0.25	0	0.03	455.97	459.35	578.54	0.57	0.53	0.64	302.99	343.05	324.08	8	0	1	14260	13493	17225	16	16	19	9235	10536	9974	12.6724	8.15708e-29	8.71288e-28	up	9.26924	0	0	up	11.9509	5.57098e-36	4.20042e-35	up	9.93734	0	0	up	NA	NA	NA	NA	-0.676276	6.15532e-11	5.2475e-10	false	1A
TraesCS1A02G265700	0.04	0	0	347.23	329.2	396.19	0	0.36	0.33	236.23	282.31	249.18	1	0	0	8965	7983	9738	0	9	8	5944	7158	6331	14.9687	1.21163e-36	1.66388e-35	up	10.2406	3.067e-181	8.90534e-180	up	14.389	3.8601e-34	2.78293e-33	up	10.7696	2.26337e-190	2.85208e-188	up	NA	NA	NA	NA	-0.536453	1.16928e-07	7.27897e-07	false	1A
TraesCS1A02G265800	0.3	0.08	0.27	90.5	79.51	96.97	0.54	0.35	0.4	77.01	77.82	82.7	8	2	7	2391	1973	2439	13	9	10	1983	2019	2150	9.0139	1.49576e-127	1.09422e-125	up	7.66786	2.4035e-182	7.02325e-181	up	8.74662	8.00587e-129	2.33891e-127	up	7.8833	5.30755e-171	5.53891e-169	up	NA	NA	NA	NA	-0.223861	0.0316877	0.0747341	false	1A
TraesCS1A02G265900	0	0	0	99.39	103.22	108.31	0.21	0.27	0.39	51.82	50.55	50.4	0	0	0	2643	2578	2742	5	7	10	1343	1320	1319	14.1845	4.31888e-33	5.32963e-32	up	7.5817	6.02345e-124	1.14444e-122	up	13.0643	2.26166e-28	1.38279e-27	up	8.65111	1.46405e-156	1.27213e-154	up	NA	NA	NA	NA	-1.07791	7.39933e-34	3.08e-32	down	1A
TraesCS1A02G266000	0.04	0.04	0.26	6.81	6.38	7.93	0.2	0.06	0.16	7.39	5.72	7.06	3	3	18	486	428	539	13	4	11	514	401	496	6.28014	2.03924e-16	1.25444e-15	up	5.7351	2.12143e-74	2.48326e-73	up	6.11735	1.03302e-15	3.72908e-15	up	5.84766	8.84562e-72	2.32176e-70	up	NA	NA	NA	NA	-0.121227	0.4166	0.563716	false	1A
TraesCS1A02G266500	2.13	2.21	3.24	4.73	4.18	4.58	3.29	3.02	2.72	4.68	3.27	3.6	162	159	237	358	297	330	225	222	196	345	243	268	1.1855	1.04324e-08	3.78911e-08	up	0.493406	0.00353763	0.0056294	false	0.863746	2.76049e-05	5.18158e-05	false	0.764563	8.04462e-06	1.83804e-05	false	0.359426	0.0631518	0.1175	false	-0.279568	0.107053	0.201903	false	1A
TraesCS1A02G266600	0.21	0.26	0.33	10.69	10.85	11.15	0.92	1.04	0.83	15.52	14.98	15.54	24	28	35	1188	1133	1180	93	112	88	1681	1635	1700	5.69734	1.71982e-171	2.07207e-169	up	4.17928	1.17263e-283	6.12933e-282	up	6.09626	3.45996e-244	2.64312e-242	up	3.72987	5.86843e-144	4.41674e-142	up	1.90461	3.70002e-10	2.63329e-09	up	0.440864	2.14145e-06	1.1711e-05	false	1A
TraesCS1A02G266900	17.15	16.25	14.94	57.22	49.77	53.93	27.91	25.76	29.45	66.4	71.23	69.5	1355	1216	1137	4498	3675	4036	1986	1968	2205	5087	5499	5377	2.0883	3.9085e-71	1.19247e-69	up	1.45507	1.42794e-134	2.95599e-133	up	2.35408	2.96379e-193	1.56774e-191	up	1.13794	1.17496e-28	1.047e-27	up	0.888705	4.32434e-24	1.00554e-22	false	0.309163	0.000804284	0.00293312	false	1A
TraesCS1A02G267700	0.32	0.51	0.54	0.58	0.57	0.99	0.51	0.36	0.54	0.64	0.48	0.55	37	56	61	67	62	110	54	41	60	73	55	63	1.003	0.00563582	0.0104829	up	0.381179	0.219671	0.263479	false	0.555362	0.0984275	0.124182	false	0.777911	0.0234673	0.0351622	false	0.163144	0.626552	0.725028	false	-0.404684	0.204239	0.333146	false	1A
TraesCS1A02G267800	0.13	0.04	0	20.23	17.1	18.72	0.79	1.15	1.32	30.11	31.85	30.06	4	1	0	597	474	526	21	33	37	866	923	873	8.68795	1.80989e-38	2.62335e-37	up	4.95334	9.97635e-158	2.44349e-156	up	9.30399	1.38949e-45	1.29434e-44	up	4.28695	4.32375e-80	1.31371e-78	up	NA	NA	NA	NA	0.659726	7.44725e-08	4.7194e-07	false	1A
TraesCS1A02G267900	7.99	7.95	8.84	7.44	6.85	6.65	19.25	19.42	18.83	13.99	13.13	13.59	1166	1099	1243	1081	935	920	2530	2741	2605	1980	1873	1943	0.10967	0.379245	0.451487	false	-0.360764	1.57088e-09	4.10225e-09	false	0.971509	2.26886e-28	1.38706e-27	false	-1.27342	1.26733e-36	1.45839e-35	down	1.32164	1.3256e-60	1.19568e-58	up	0.904224	1.54113e-19	2.95646e-18	false	1A
TraesCS1A02G268400	2.49	1.26	2.16	1.81	1.12	1.91	3.08	2.71	1.66	1.02	0.55	1.06	98	47	82	71	41	71	109	103	62	39	21	41	0.0628825	0.864915	0.892787	false	-1.36314	8.57256e-05	0.00016109	down	-0.917893	0.0184652	0.0259614	false	-0.433957	0.198448	0.247173	false	0.434398	0.157335	0.249355	false	-0.937011	0.0167497	0.0435333	false	1A
TraesCS1A02G268500	10.44	9.46	11.58	1.59	1.49	1.84	14.53	14.02	14.12	2.01	2.42	2.92	1147	984	1225	174	153	191	1437	1489	1469	214	260	314	-2.32734	3.13621e-48	5.89835e-47	down	-2.3993	3.6907e-106	6.03547e-105	down	-1.84434	9.2076e-39	7.41136e-38	down	-2.9337	6.43123e-111	3.1552e-109	down	0.544789	9.85389e-09	6.14044e-08	false	0.525448	0.00736859	0.0213203	false	1A
TraesCS1A02G268600	35.04	28.37	29.64	17.46	12.36	15.7	37.21	38.97	35.31	6.87	6.25	6.82	2130	1633	1736	1056	702	904	2037	2291	2034	405	371	406	-0.675669	1.46969e-05	3.96838e-05	false	-2.34649	7.13225e-169	1.88968e-167	down	-1.96875	3.73775e-66	4.9829e-65	down	-1.10506	2.98703e-16	1.45803e-15	down	0.367333	0.000107373	0.000399412	false	-1.24896	5.85097e-17	8.94234e-16	down	1A
TraesCS1A02G268800	0.2	0.3	0.05	1.1	0.73	1.09	0.07	0.39	0.03	0.86	1.44	0.51	13	19	3	72	45	68	4	25	2	55	93	33	2.77483	8.41737e-08	2.84251e-07	up	2.64547	0.01051	0.0157317	up	2.62033	1.27661e-06	2.65681e-06	up	2.74194	4.32972e-06	1.01241e-05	up	NA	NA	NA	NA	-0.108356	0.776677	0.858067	false	1A
TraesCS1A02G268900	0	0	0	0.02	0	0	2.08	1.89	1.6	0	0	0	0	0	0	1	0	0	125	122	101	0	0	0	NA	NA	NA	NA	-9.22159	2.94922e-14	9.90657e-14	down	NA	NA	NA	NA	-8.19103	1.99323e-11	7.08053e-11	down	9.45794	5.38348e-15	6.19069e-14	up	NA	NA	NA	NA	1A
TraesCS1A02G269000	1.02	1.01	0.91	0.16	0.21	0.22	0.93	0.57	1.09	0.4	0.43	0.31	101	95	87	16	19	21	83	55	102	38	42	30	-1.96884	2.05849e-07	6.7041e-07	down	-1.04601	0.0018264	0.00300413	down	-1.11485	0.000375157	0.000637377	down	-1.95046	1.33386e-06	3.25412e-06	down	-0.0793609	0.768961	0.837496	false	NA	NA	NA	NA	1A
TraesCS1A02G269600	5.37	4.51	4.58	2.12	1.84	2.09	6.19	5.64	6.02	0.94	1.6	1.54	538	428	442	211	172	198	559	547	572	91	157	151	-0.907365	3.55797e-07	1.13521e-06	false	-1.99274	1.0503e-33	6.48178e-33	down	-1.5717	4.13727e-16	1.52469e-15	down	-1.37993	3.14296e-19	1.82447e-18	down	0.410829	0.000620159	0.00199832	false	-0.621016	0.00689586	0.0200971	false	1A
TraesCS1A02G270300	4.94	5.08	4.34	7.53	7.22	7.05	4.92	5.23	4.8	13.85	12.74	10.6	354	345	300	537	484	479	318	363	326	963	893	744	0.954136	3.69884e-10	1.50358e-09	false	1.45116	1.09587e-34	6.9059e-34	up	1.62874	1.13518e-34	8.27515e-34	up	0.7256	2.34992e-07	6.09815e-07	false	0.166807	0.220003	0.325795	false	0.71711	5.04006e-08	3.25351e-07	false	1A
TraesCS1A02G270400	12.17	10.95	11.3	20.26	19.73	19.35	10.07	11	11.01	19.88	18.48	19.46	1122	956	1004	1859	1700	1690	836	981	962	1778	1665	1757	1.1361	3.34754e-23	2.84353e-22	up	0.986779	2.93223e-39	2.03229e-38	false	1.0029	2.77125e-28	1.68893e-27	up	1.06925	2.55515e-25	1.99143e-24	up	0.00557681	0.953706	0.969023	false	-0.0908575	0.322026	0.467962	false	1A
TraesCS1A02G270700	30.48	26.98	28.34	61.46	50.07	56.02	36.13	36.93	33.53	83.39	89.6	74.72	1112	932	996	2231	1707	1936	1187	1303	1159	2950	3194	2669	1.31937	8.60664e-24	7.51518e-23	up	1.35382	2.20104e-69	2.42419e-68	up	1.78406	2.19238e-78	3.50804e-77	up	0.837697	8.5582e-13	3.33997e-12	false	0.41978	7.84526e-06	3.48876e-05	false	0.508316	5.76659e-06	2.98739e-05	false	1A
TraesCS1A02G270800	0.24	0.56	0.11	1.12	1.1	1.81	0.17	0.31	0.07	2.82	2.43	1.86	11	25	5	52	48	80	7	14	3	128	111	85	2.50606	1.35795e-06	4.09668e-06	up	3.83921	3.35567e-19	1.38337e-18	up	3.23012	1.34506e-14	4.56225e-14	up	3.06357	7.23143e-09	2.10857e-08	up	NA	NA	NA	NA	0.768393	0.0109106	0.0300943	false	1A
TraesCS1A02G271000	0.57	0.99	0.94	0.35	0.11	0.25	0.39	0.5	0.53	1.04	0.67	0.75	34	56	54	21	6	14	21	29	30	60	39	44	-1.44535	0.00757344	0.0137711	down	0.923566	0.0168863	0.0245575	false	0.235095	0.528493	0.575078	false	NA	NA	NA	NA	-0.699757	0.0717329	0.130577	false	1.72592	0.000527259	0.00199471	up	1A
TraesCS1A02G271700	21.65	18.8	23.27	6.45	4.28	5.47	19.09	22.48	22.16	7.15	8.12	6.64	1099	904	1138	326	203	263	873	1104	1066	352	403	330	-1.61874	6.49814e-20	4.76493e-19	down	-1.40364	5.76913e-37	3.81538e-36	down	-1.28589	1.65932e-23	8.56589e-23	down	-1.78781	2.75604e-28	2.42283e-27	down	0.107478	0.325333	0.442799	false	0.377118	0.0394322	0.0896873	false	1A
TraesCS1A02G272300	0	0	0	1.67	1.38	2.34	0	0	0.02	1.28	1.21	1.3	0	0	0	94	73	125	0	0	1	70	67	72	9.41936	2.23712e-14	1.2196e-13	up	7.68424	4.15797e-10	1.12077e-09	up	8.81224	9.9196e-13	3.01671e-12	up	8.23984	2.1629e-11	7.66755e-11	up	NA	NA	NA	NA	-0.562994	0.0501517	0.10934	false	1A
TraesCS1A02G272400	1.63	1.47	2.12	1.6	2.29	2.62	0.82	1.14	0.73	1.87	1.65	1.54	90	77	113	88	118	137	41	61	38	100	89	83	0.660285	0.0204666	0.0341366	false	1.04233	0.000348727	0.00061958	up	0.20524	0.440461	0.488702	false	1.44709	3.18067e-06	7.52657e-06	up	-0.847824	0.00441964	0.0117123	false	-0.414088	0.111492	0.208567	false	1A
TraesCS1A02G272600	6.3	6.72	6.34	5.08	2.62	3.52	3.39	2.84	3.52	1.89	1.51	2.27	227	229	220	182	88	120	110	99	120	66	53	80	-0.424698	0.0987078	0.140164	false	-0.645396	0.0121292	0.0180108	false	-1.51741	1.8989e-11	5.33787e-11	down	0.395547	0.156677	0.199805	false	-0.882873	1.75186e-06	8.52766e-06	false	-1.04775	0.000490528	0.00186586	down	1A
TraesCS1A02G272800	4.53	3.91	4.49	2.17	3.3	6.52	5.37	7.13	7.28	3.72	2.11	2.94	44	36	42	21	30	60	47	67	67	35	20	28	0.238266	0.608237	0.670536	false	-1.03864	0.00464087	0.00727856	down	-0.306827	0.467327	0.515308	false	-0.54422	0.194755	0.243032	false	0.721403	0.0241188	0.0517579	false	NA	NA	NA	NA	1A
TraesCS1A02G272900	3.81	4.38	3.92	3.27	4.12	3.75	2.36	3.24	3.75	1.58	1.87	2.06	102	111	101	87	103	95	57	84	95	41	49	54	0.226352	0.384855	0.457177	false	-0.626844	0.0396325	0.0545532	false	-0.878514	0.00212847	0.00334813	false	0.427297	0.128584	0.167176	false	-0.261563	0.298884	0.414521	false	-1.06341	0.000243977	0.000983521	down	1A
TraesCS1A02G273000	4.8	3.37	4.11	7.76	7.6	7.9	5.35	5.27	5.08	9.83	9.89	8.78	292	194	241	470	432	455	293	310	293	580	588	523	1.26985	8.90579e-13	4.38391e-12	up	0.997835	2.56784e-17	9.87273e-17	false	1.46737	1.29024e-21	6.15923e-21	up	0.749311	1.77252e-07	4.64421e-07	false	0.459393	0.00456968	0.0120637	false	0.24004	0.0613474	0.129134	false	1A
TraesCS1A02G273500	0.42	0.47	0.57	1.13	0.86	1.07	0.35	0.39	0.38	1.29	1.08	1.21	20	21	26	53	38	48	15	18	17	59	50	56	1.42018	0.00108515	0.00229074	up	1.80515	4.8868e-06	1.01656e-05	up	1.54662	7.44328e-05	0.000134749	up	1.62782	0.000252362	0.000496091	up	NA	NA	NA	NA	0.169611	0.615542	0.736578	false	1A
TraesCS1A02G274400	7.81	9.23	9.59	16.61	20.43	21.96	10.21	9.49	8.71	25.08	20.34	22.53	497	556	588	1052	1215	1324	585	584	525	1548	1265	1404	1.49649	1.88072e-26	1.82976e-25	up	1.39626	2.31288e-46	1.8309e-45	up	1.60817	7.93091e-45	7.27426e-44	up	1.23397	6.95672e-22	4.64268e-21	up	0.200979	0.0956194	0.166067	false	0.152933	0.203878	0.332738	false	1A
TraesCS1A02G274800	4.27	3.75	4.43	2.07	1.26	1.9	3.46	3.88	4.11	1.32	1.47	1.36	280	233	280	135	77	118	204	246	255	84	94	87	-0.894712	0.000209676	0.000490353	false	-1.32814	3.08185e-12	9.37045e-12	down	-1.33378	2.94632e-11	8.17945e-11	down	-0.940554	5.21601e-05	0.000110454	false	-0.0157865	0.920161	0.946664	false	-0.394537	0.144383	0.255919	false	1A
TraesCS1A02G275000	0	0	0	0.96	1.1	0.96	0.1	0.18	0.31	5	4.5	3.98	0	0	0	55	59	52	5	10	17	278	252	223	8.59869	8.02445e-12	3.69525e-11	up	4.64143	3.19201e-46	2.52248e-45	up	10.6622	5.13873e-19	2.18665e-18	up	2.53166	1.83577e-07	4.80538e-07	up	NA	NA	NA	NA	2.10477	4.0229e-21	8.66973e-20	up	1A
TraesCS1A02G275200	16.45	16.65	19.55	26.22	23.03	29.63	19.62	17.36	16.19	37.05	35.1	35.63	932	893	1067	1478	1219	1590	1001	951	869	2035	1943	1976	0.936525	2.65031e-11	1.17527e-10	false	1.15724	3.7341e-48	3.0528e-47	up	1.28852	9.11871e-42	7.83383e-41	up	0.753815	5.52058e-09	1.62178e-08	false	0.120722	0.264318	0.376639	false	0.39509	0.000407199	0.00157214	false	1A
TraesCS1A02G275400	0.44	0.71	0.9	0.23	0.22	0.25	0.41	0.5	0.49	0.24	0.19	0.15	70	106	137	36	32	37	59	77	73	37	29	24	-1.21246	0.000772151	0.00166641	down	-1.13043	0.000848381	0.00144866	down	-1.55414	1.31902e-05	2.54498e-05	down	-0.839251	0.0149234	0.0231226	false	-0.434518	0.126081	0.208419	false	NA	NA	NA	NA	1A
TraesCS1A02G276200	0	0.02	0	0.38	0.65	0.33	0	0	0.07	0.57	0.88	0.81	0	1	0	24	38	20	0	0	4	35	54	50	NA	NA	NA	NA	5.2028	1.19749e-09	3.1498e-09	up	7.26084	9.79854e-09	2.32564e-08	up	NA	NA	NA	NA	NA	NA	NA	NA	0.684899	0.102473	0.195152	false	1A
TraesCS1A02G276300	7.57	8.34	10.15	33.35	29.03	25.7	11.68	12.82	10.28	45.83	50.25	45.35	185	193	239	811	663	595	257	303	238	1086	1200	1085	2.11008	7.111e-34	9.04557e-33	up	2.16045	8.97544e-89	1.22943e-87	up	2.69592	1.84308e-97	3.81161e-96	up	1.52391	2.62585e-22	1.78836e-21	up	0.524441	0.00209608	0.00600892	false	0.62821	5.05813e-07	2.97314e-06	false	1A
TraesCS1A02G276500	2.65	2.7	2.1	1.53	1.78	1.64	4.47	4.83	4.67	5.96	6.4	5.85	233	225	178	134	146	137	354	411	389	508	550	504	-0.241048	0.258629	0.325532	false	0.51921	4.4641e-06	9.31296e-06	false	1.54457	7.40587e-26	4.15997e-25	up	-1.31727	1.00469e-14	4.44312e-14	down	1.01473	7.98787e-12	6.75112e-11	up	1.82769	4.88646e-32	1.89197e-30	up	1A
TraesCS1A02G276800	0.03	0.03	0	1.79	0.85	0.76	0.07	0.35	0.3	0.38	0.5	0.62	2	2	0	121	54	49	4	23	19	25	33	41	6.17495	3.88754e-13	1.96057e-12	up	NA	NA	NA	NA	NA	NA	NA	NA	2.44536	1.59207e-06	3.86079e-06	up	NA	NA	NA	NA	-1.25252	0.0018787	0.00631094	down	1A
TraesCS1A02G277000	4.83	6.53	6.19	3.38	3.19	2.83	5.13	4.34	4.77	7.78	5.83	6.91	290	371	358	202	179	161	277	252	271	453	342	406	-0.546523	0.00493843	0.00928991	false	0.666385	3.63807e-06	7.64238e-06	false	0.483063	0.00254907	0.00397881	false	-0.413868	0.023351	0.0350008	false	-0.194379	0.206072	0.309192	false	1.07141	5.04725e-10	3.92389e-09	up	1A
TraesCS1A02G278000	1.85	1.86	1.67	0.99	1.24	1.06	1.09	0.97	1.12	0.65	0.69	0.62	472	450	411	250	295	255	251	239	271	160	172	154	-0.369969	0.0220297	0.0365096	false	-0.566063	0.000529203	0.000923045	false	-1.20767	7.20994e-15	2.48413e-14	down	0.221128	0.190037	0.237643	false	-0.652192	1.40327e-06	6.90823e-06	false	-0.796372	7.65042e-06	3.89269e-05	false	1A
TraesCS1A02G278200	0.93	0.79	1.29	1.2	1.5	1.56	1.91	1.97	1.88	3.15	3.39	3.39	101	81	135	129	152	160	186	206	193	331	359	359	0.842527	0.00130844	0.00272316	false	0.924064	6.66339e-11	1.88112e-10	false	1.97259	4.69069e-24	2.47155e-23	up	-0.256233	0.202636	0.251774	false	1.03806	8.80162e-07	4.43925e-06	up	1.17134	1.22062e-11	1.11768e-10	up	1A
TraesCS1A02G278400	0.34	0.3	0.36	0.17	0.08	0.15	2.25	2.71	3	1.74	1.13	2.47	22	18	22	11	5	9	130	168	182	108	71	155	NA	NA	NA	NA	-0.439365	0.0813606	0.106169	false	2.67603	2.50904e-13	7.91424e-13	up	-4.1082	5.91748e-25	4.53743e-24	down	3.10513	5.05514e-27	1.40712e-25	up	3.66039	4.3984e-16	6.21917e-15	up	1A
TraesCS1A02G278500	3.95	6.26	5.18	6.15	5.94	7.65	5.75	3.02	4.07	10	7.42	8.94	42	63	53	65	59	77	55	31	41	103	77	93	0.714449	0.0369199	0.0582112	false	1.17942	0.00012909	0.000238883	up	1.03471	0.000567493	0.000948169	up	0.807837	0.0232839	0.0349116	false	-0.155786	0.659355	0.752427	false	0.362809	0.197334	0.324646	false	1A
TraesCS1A02G278800	8.01	6.2	5.39	7.96	6.95	6.69	9.81	10.19	9.9	12.97	17.88	16.59	549	402	356	543	445	434	605	675	643	862	1197	1113	0.491733	0.00598466	0.0110808	false	0.803342	2.69476e-13	8.63598e-13	false	1.52847	4.02232e-24	2.1249e-23	up	-0.284938	0.0346708	0.0504481	false	0.715078	2.40487e-07	1.29749e-06	false	1.08018	2.57277e-14	3.07837e-13	up	1A
TraesCS1A02G279500	6.38	7.53	7.08	11.3	10.36	9.58	7.92	7.01	6.78	5.26	5.7	5.13	323	361	345	569	490	459	361	343	325	258	282	254	0.926626	2.94427e-09	1.11622e-08	false	-0.294309	0.0334187	0.0465153	false	-0.127534	0.396818	0.444769	false	0.708769	1.52735e-06	3.70992e-06	false	0.15598	0.253925	0.364874	false	-1.01152	4.71343e-12	4.51955e-11	down	1A
TraesCS1A02G279800	0.87	0.42	0.85	8.19	9.41	9.08	0.93	1.13	1.11	10.06	9.54	9.54	101	46	95	949	1024	1001	97	127	122	1136	1085	1087	3.98774	6.76657e-88	2.75498e-86	up	3.34014	6.30862e-167	1.6502e-165	up	4.02189	1.65462e-119	4.36105e-118	up	3.25589	1.01948e-110	4.98952e-109	up	0.67114	0.0154062	0.035102	false	0.075723	0.456539	0.601244	false	1A
TraesCS1A02G280200	2.68	3.13	2.52	0.38	1	0.64	1.81	1.3	2.29	0.48	0.76	0.76	115	127	104	16	40	26	70	54	93	20	32	32	-1.71314	2.871e-06	8.36792e-06	down	-1.28953	0.000338715	0.000602475	down	-1.79615	2.2142e-08	5.14676e-08	down	-1.25613	0.00215328	0.00377529	down	-0.51712	0.0456305	0.0893377	false	NA	NA	NA	NA	1A
TraesCS1A02G280500	23.15	20.49	22.23	2.09	2.07	2.27	24.69	24.83	26.6	2.05	1.25	1.72	2130	1785	1970	191	178	198	2046	2209	2319	183	112	155	-3.00713	6.35392e-108	3.53877e-106	down	-3.78629	1.55155e-242	6.53952e-241	down	-3.4603	8.01426e-137	2.54003e-135	down	-3.38369	4.58381e-179	5.14615e-177	down	0.315321	0.000122221	0.000450122	false	-0.411375	0.057715	0.122901	false	1A
TraesCS1A02G280700	0.38	0.43	0.76	8.63	6.14	6.69	2.64	1.54	1.81	5.95	6.84	7.25	12	13	23	271	181	200	75	47	54	182	211	224	4.12948	1.45467e-35	1.93899e-34	up	1.88525	2.94049e-16	1.07987e-15	up	3.92928	2.01396e-37	1.57062e-36	up	2.03383	9.93141e-15	4.39269e-14	up	2.03415	1.03391e-06	5.17396e-06	up	-0.156736	0.42937	0.575766	false	1A
TraesCS1A02G281400	3.25	4.79	3.58	13.45	18.32	16.09	6.91	6.8	5.83	170.09	158.8	173.87	304	425	323	1253	1603	1427	583	616	517	15446	14531	15943	2.39025	3.84294e-54	8.29209e-53	up	4.82278	0	0	up	5.69396	0	0	up	1.4684	3.51417e-31	3.43759e-30	up	0.860113	3.26293e-09	2.12338e-08	false	3.34425	8.77547e-259	2.00467e-255	up	1A
TraesCS1A02G281600	15.64	16.47	14.96	18.41	20.34	21.22	12.08	11.72	11.92	21.93	25.16	24.14	858	856	791	1005	1043	1103	597	622	620	1167	1349	1297	0.698945	6.1028e-09	2.25601e-08	false	1.13303	6.93891e-39	4.77651e-38	up	0.85322	2.47822e-18	1.01949e-17	false	0.927752	1.7361e-16	8.60991e-16	false	-0.290318	0.00339731	0.00926697	false	0.19653	0.0631123	0.13209	false	1A
TraesCS1A02G281700	7.72	6.13	7.85	4	4.32	3.56	7.73	7.66	7.66	4.08	3.47	2.85	409	308	401	211	214	179	369	393	385	210	180	148	-0.522021	0.00521814	0.00977372	false	-1.00986	7.72219e-11	2.17282e-10	down	-0.806088	1.11268e-05	2.16008e-05	false	-0.775939	1.44705e-06	3.51965e-06	false	0.193172	0.162904	0.256469	false	-0.242672	0.221999	0.355107	false	1A
TraesCS1A02G282200	3.98	3.48	3.78	0.8	2.51	1.17	2.67	1.94	2.76	1.58	1.13	1.81	151	125	138	30	89	42	91	71	99	58	42	67	-1.00134	0.00439911	0.00835803	down	-0.565286	0.0527902	0.0712422	false	-1.06188	8.24646e-05	0.000148772	down	-0.553476	0.141255	0.182053	false	-0.507361	0.0255164	0.0543608	false	-0.02446	0.951728	0.971065	false	1A
TraesCS1A02G282600	0.25	0.06	0.18	0.48	0.17	0.19	1.01	1.09	1.15	0.74	0.68	0.57	14	3	10	27	9	10	52	60	62	41	38	32	NA	NA	NA	NA	-0.565108	0.08799	0.114096	false	NA	NA	NA	NA	-1.76854	0.000213273	0.000422808	down	2.84581	9.8051e-10	6.69434e-09	up	NA	NA	NA	NA	1A
TraesCS1A02G282800	1.96	0.8	1.78	4.29	3.63	5.44	2.62	1.57	0.89	5.89	7.56	5.79	49	19	43	107	85	129	59	38	21	143	185	142	1.90512	1.62631e-07	5.34581e-07	up	2.06619	1.06501e-11	3.14302e-11	up	2.3317	2.75714e-14	9.17599e-14	up	1.58676	1.32574e-05	2.9693e-05	up	0.258023	0.566343	0.673769	false	0.470759	0.0497694	0.108668	false	1A
TraesCS1A02G283000	3.67	2.46	3.42	12.28	10.55	12.47	4.09	4.23	3.32	15.41	18.49	13.45	197	125	177	657	530	635	198	220	169	803	971	708	2.23849	5.67598e-33	6.97662e-32	up	2.16132	8.71473e-54	7.7923e-53	up	2.56346	3.13514e-54	3.43618e-53	up	1.7849	4.44013e-28	3.86804e-27	up	0.392185	0.0490021	0.0948979	false	0.368464	0.00959074	0.0268599	false	1A
TraesCS1A02G283100	0.61	0.59	0.67	5.7	4.38	4.47	1.23	1.44	1.07	5.89	7.3	6.06	58	53	62	541	391	404	106	133	97	545	681	566	3.31609	4.36165e-53	9.19624e-52	up	2.49702	3.81279e-59	3.68788e-58	up	3.61969	7.23009e-90	1.35947e-88	up	2.14208	4.40031e-28	3.83445e-27	up	1.11186	1.26512e-05	5.46021e-05	up	0.347222	0.02353	0.0581403	false	1A
TraesCS1A02G284000	0.33	0.53	0.64	0.97	1.26	0.94	0.4	0.45	0.62	0.44	0.39	0.47	36	54	66	104	127	96	39	47	63	46	41	50	1.42875	5.98296e-06	1.68645e-05	up	-0.0365825	0.913755	0.927329	false	0.0560244	0.878104	0.895909	false	1.28586	1.41374e-05	3.15801e-05	up	0.0819082	0.81258	0.869869	false	-1.33216	2.87614e-06	1.55047e-05	down	1A
TraesCS1A02G284400	0.33	0.33	0.47	0.39	0.75	0.38	0.3	0.23	0.4	0.88	0.74	0.72	28	27	39	33	60	31	23	19	32	73	62	60	NA	NA	NA	NA	1.47992	3.79057e-05	7.35137e-05	up	1.29935	0.000257617	0.000444339	up	NA	NA	NA	NA	NA	NA	NA	NA	0.577652	0.107751	0.202847	false	1A
TraesCS1A02G284500	0	0.07	0.1	3.28	2.61	1.98	0.19	0.16	0.16	2.01	1.33	2.35	0	4	6	211	158	121	11	10	10	126	84	149	5.97693	1.05622e-27	1.08293e-26	up	3.61367	6.88897e-21	3.00907e-20	up	5.41004	4.27068e-22	2.08346e-21	up	4.12957	9.95249e-28	8.55483e-27	up	NA	NA	NA	NA	-0.524382	0.0444154	0.0989223	false	1A
TraesCS1A02G284900	0.86	1.31	1.37	25.07	21.07	22.47	1.47	1.89	1.71	6.66	6.19	6.26	54	78	83	1567	1237	1337	83	115	102	406	380	385	4.6333	8.63984e-148	8.08338e-146	up	2.04854	2.09316e-36	1.36882e-35	up	2.69075	6.40345e-44	5.77411e-43	up	3.93968	3.72602e-144	2.81476e-142	up	0.629748	0.016954	0.0381683	false	-1.89933	9.21966e-55	8.23998e-53	down	1A
TraesCS1A02G285000	5.91	5.05	5.72	20.09	15.8	20.9	9.04	9.66	10.1	24.3	24.93	24.42	609	493	568	2061	1522	2041	839	963	987	2429	2512	2465	2.12223	9.21564e-47	1.6653e-45	up	1.49158	4.44576e-104	7.11608e-103	up	2.39682	7.43847e-145	2.53859e-143	up	1.16578	2.92378e-19	1.70032e-18	up	0.89477	9.24517e-17	1.25153e-15	false	0.318553	0.00625513	0.0184303	false	1A
TraesCS1A02G285400	10.73	8.76	9.73	5.03	5.65	4.86	8.89	8.79	9.63	1.6	1.68	2.08	1145	885	1000	534	563	491	854	907	973	166	175	217	-0.564833	3.98211e-05	0.000102279	false	-2.21118	1.35062e-74	1.58472e-73	down	-2.19295	1.14104e-53	1.23395e-52	down	-0.633635	8.05071e-08	2.16841e-07	false	0.00808691	0.938159	0.958978	false	-1.58665	1.55113e-24	4.18644e-23	down	1A
TraesCS1A02G286000	6.51	6.74	7.43	6.52	7.83	8.84	4.81	3.46	3.83	8	7.14	7.84	251	246	276	250	282	323	167	129	140	299	269	296	0.513203	0.00533129	0.00996322	false	1.06467	3.98911e-10	1.07618e-09	up	0.407433	0.00917633	0.0134343	false	1.11958	2.13246e-08	5.99405e-08	up	-0.667938	0.000188391	0.000671767	false	-0.0641306	0.698871	0.800957	false	1A
TraesCS1A02G286100	0	0	0	1.46	1.46	1.67	0.09	0.04	0.05	3.78	4.37	2.44	0	0	0	34	32	37	2	1	1	86	100	56	NA	NA	NA	NA	6.00001	7.96209e-14	2.61558e-13	up	9.02485	2.93427e-13	9.22161e-13	up	NA	NA	NA	NA	NA	NA	NA	NA	1.15532	0.000856801	0.00310679	up	1A
TraesCS1A02G286500	4.85	4.08	4.57	1.68	1.07	1.22	3.85	4.08	4.44	1.98	1.79	1.89	382	304	347	132	79	91	273	311	331	151	138	146	-1.40545	7.0367e-10	2.80556e-09	down	-0.989759	5.36407e-10	1.43684e-09	false	-0.999309	6.47227e-09	1.55312e-08	false	-1.44711	2.71355e-11	9.55438e-11	down	-0.0198629	0.888633	0.924104	false	0.450095	0.0659915	0.136928	false	1A
TraesCS1A02G286900	139.35	113.78	129.47	73.2	56.86	64.48	133.52	138.08	134.8	59.37	60.88	54.27	6034	4666	5401	3154	2301	2645	5207	5783	5531	2493	2576	2301	-0.621661	3.22331e-06	9.34587e-06	false	-1.08231	1.68745e-79	2.08579e-78	down	-0.87853	9.29893e-22	4.47095e-21	false	-0.876722	3.90814e-15	1.77685e-14	false	0.193448	0.0191226	0.0423812	false	-0.213179	0.0598896	0.126696	false	1A
TraesCS1A02G287000	1.31	0.88	2.32	74.19	45.71	75.51	9.18	12.14	12.16	85.08	96.09	78.72	41	26	70	2314	1339	2242	259	368	361	2586	2943	2416	5.79585	6.15325e-35	8.06714e-34	up	3.09237	9.97398e-201	3.27921e-199	up	6.10322	1.03226e-57	1.19893e-56	up	2.73484	2.39481e-52	4.13103e-51	up	3.00006	3.70942e-33	1.37557e-31	up	0.351937	0.182091	0.305338	false	1A
TraesCS1A02G287100	0.34	0.83	0.72	1.06	0.84	0.73	0.94	0.56	0.51	1.14	1.2	1.33	28	65	57	87	65	57	70	45	40	91	97	107	0.839535	0.028143	0.0455591	false	1.00214	0.00057912	0.00100628	up	1.21789	0.000182188	0.000318828	up	0.572094	0.10312	0.136829	false	0.204614	0.588356	0.692792	false	0.420904	0.126439	0.23056	false	1A
TraesCS1A02G287200	9.27	9.29	8.17	8.22	3.97	5.62	4.72	3.27	2.85	3.98	2.61	4.57	120	114	102	106	48	69	55	41	35	50	33	58	-0.22145	0.486765	0.556825	false	0.181266	0.619676	0.664753	false	-1.00496	0.000738238	0.001219	down	0.912711	0.0148934	0.0230779	false	-1.19828	1.70547e-05	7.23718e-05	down	-0.738425	0.0424317	0.0951684	false	1A
TraesCS1A02G287600	5.68	7.75	5.92	6.23	9.64	7.55	4.15	3.77	5.15	6.39	5.96	6.67	931	1203	934	1016	1476	1172	612	597	800	1015	955	1071	0.620099	6.28873e-05	0.000157428	false	0.680132	2.56638e-10	7.00145e-10	false	0.233322	0.0480282	0.0637431	false	1.01704	9.47436e-12	3.43939e-11	up	-0.45769	0.000581185	0.00188335	false	-0.34681	0.00845042	0.024009	false	1A
TraesCS1A02G288200	1.68	1.52	1.32	0.81	1	0.74	1.84	1.57	1.34	0.51	0.56	0.8	216	185	163	103	120	90	212	195	163	64	70	100	-0.482866	0.0402715	0.0629109	false	-1.20727	1.3249e-07	3.07424e-07	down	-1.02141	2.39029e-05	4.51144e-05	down	-0.71941	0.00156721	0.00279767	false	0.17498	0.345505	0.46337	false	-0.497494	0.0689637	0.141945	false	1A
TraesCS1A02G288700	0.73	0.63	0.75	0.19	0.18	0.18	0.82	0.6	0.84	0.29	0.31	0.28	87	71	86	22	20	20	88	69	95	34	36	33	-1.60919	3.03926e-05	7.91642e-05	down	-1.21147	9.87397e-05	0.000184493	down	-0.996415	0.0022808	0.00357778	false	-1.87491	4.18124e-07	1.06378e-06	down	0.204531	0.427232	0.545974	false	NA	NA	NA	NA	1A
TraesCS1A02G289300	23.52	18.81	27.5	31.63	46.64	51.91	24.4	17.07	23.94	31.97	25.65	27.78	198	150	223	265	367	414	185	139	191	261	211	229	1.24156	1.12178e-08	4.0639e-08	up	0.523989	0.00407681	0.00643895	false	0.543769	0.00524509	0.00790294	false	1.17172	2.01033e-08	5.66096e-08	up	0.00948327	0.962854	0.975072	false	-0.657183	0.000526542	0.0019925	false	1A
TraesCS1A02G289600	4.16	3.39	7.15	7.88	7.24	9.66	5.41	8.97	4.14	5.27	6.2	4	35	27	58	66	57	77	41	73	33	43	51	33	1.10401	0.00425424	0.0081046	up	-0.125016	0.742508	0.777607	false	0.327556	0.426999	0.475194	false	0.600129	0.100847	0.134077	false	0.441878	0.26931	0.382069	false	-0.733577	0.0299019	0.071246	false	1A
TraesCS1A02G289900	0.58	1.34	1.56	9.26	6.9	10.34	1.15	4.17	2.55	6.18	6.01	7.3	5	11	13	80	56	85	9	35	21	52	51	62	3.29681	2.126e-12	1.01925e-11	up	1.43593	0.000826357	0.00141283	up	2.75157	8.49507e-09	2.02416e-08	up	1.92942	8.7522e-06	1.99401e-05	up	NA	NA	NA	NA	-0.501093	0.108339	0.203761	false	1A
TraesCS1A02G290100	3.94	3.6	3.69	8.52	7.94	9.91	3.78	4.62	1.68	9.44	9.76	10.13	52	45	47	112	98	124	45	59	21	121	126	131	1.58344	7.43753e-08	2.52158e-07	up	1.67663	4.4895e-08	1.07286e-07	up	1.63996	4.09408e-10	1.0554e-09	up	1.56844	5.59563e-06	1.29674e-05	up	-0.0473362	0.901558	0.933869	false	0.0996196	0.661985	0.773413	false	1A
TraesCS1A02G291200	1.58	1.74	1.12	1.83	1.62	1.47	2.05	1.91	2.38	6.44	6.55	5.6	119	124	81	137	114	105	139	139	170	470	482	413	0.503836	0.0590428	0.0887115	false	1.68954	3.88634e-30	2.19927e-29	up	2.32355	2.49209e-38	1.9839e-37	up	-0.181398	0.425694	0.485173	false	0.623506	0.00483359	0.0126882	false	1.86271	4.33069e-27	1.3476e-25	up	1A
TraesCS1A02G291800	0.1	0	0.1	0.79	0.59	1.01	0.08	0.2	0.08	1.46	1.02	1.52	5	0	5	41	29	50	4	10	4	74	52	78	NA	NA	NA	NA	3.58724	5.72985e-13	1.80512e-12	up	4.59928	2.73203e-14	9.09691e-14	up	NA	NA	NA	NA	NA	NA	NA	NA	0.685374	0.0520936	0.112884	false	1A
TraesCS1A02G293400	1.24	1.33	1.24	0.93	0.58	0.65	2.9	2.46	3.39	1.79	0.85	1.38	64	65	62	48	28	32	135	123	166	90	43	70	-0.454897	0.23124	0.295481	false	-0.980539	0.000286134	0.000512698	false	0.336384	0.308562	0.354877	false	-1.82268	2.36916e-09	7.14974e-09	down	1.30599	2.74916e-08	1.63445e-07	up	0.834603	0.0289726	0.0693443	false	1A
TraesCS1A02G294700	0.02	0.13	0.15	0.04	0.09	0.38	4.88	5.16	3.61	3.63	3	3.01	1	6	7	2	4	17	207	235	161	166	138	139	NA	NA	NA	NA	-0.363829	0.062747	0.0836178	false	5.22975	7.31316e-29	4.53693e-28	up	-4.55138	5.60013e-09	1.64459e-08	down	5.58286	1.2655e-35	5.12992e-34	up	4.18511	1.95111e-21	4.28568e-20	up	1A
TraesCS1A02G294800	0.56	0.79	0.81	0.87	0.85	0.68	0.08	0.02	0	0	0	0	38	51	53	59	54	44	5	1	0	0	0	0	0.507968	0.165963	0.221484	false	NA	NA	NA	NA	-7.76283	1.26318e-09	3.15803e-09	down	4.84942	8.12837e-11	2.75022e-10	up	-4.40433	2.88782e-09	1.88824e-08	down	-8.22836	5.90449e-11	5.03893e-10	down	1A
TraesCS1A02G295200	9.31	10	9.59	2.1	2.81	2.09	9.72	9.52	10.33	1.6	0.97	1.36	1164	1184	1155	261	328	248	1095	1152	1224	194	118	166	-1.70059	6.34295e-33	7.7867e-32	down	-2.77807	5.831e-99	8.9238e-98	down	-2.6258	1.38395e-70	1.9687e-69	down	-1.90277	1.02085e-46	1.53893e-45	down	0.141452	0.10027	0.172718	false	-0.884821	2.13301e-05	0.000102152	false	1A
TraesCS1A02G295300	5.56	4.93	5.29	6.73	4.62	5.13	4.19	5.91	5.23	2.3	2.81	2.42	441	370	404	531	342	385	299	453	393	177	218	188	0.41881	0.0228111	0.0376766	false	-0.888007	4.86188e-08	1.15952e-07	false	-0.811538	3.19988e-07	6.91837e-07	false	0.290844	0.120051	0.157023	false	0.0663967	0.650178	0.744686	false	-1.18605	1.74695e-10	1.42689e-09	down	1A
TraesCS1A02G295600	0.15	0.07	0.2	0.27	0.43	0.21	3.46	3.54	2.92	6.98	5.96	6.36	17	7	22	30	45	22	352	387	312	764	657	703	NA	NA	NA	NA	1.09624	8.70475e-21	3.79136e-20	up	5.77681	5.12055e-113	1.26116e-111	up	-3.29075	5.30263e-39	6.52616e-38	down	4.67009	6.15536e-64	6.0526e-62	up	4.37634	1.22235e-94	2.95798e-92	up	1A
TraesCS1A02G295800	0.74	0.15	0.39	463.83	233.31	343.3	1.29	2.02	0.98	129.98	110.33	98.99	16	3	8	9923	4688	6992	25	42	20	2710	2318	2084	10.0206	9.25708e-58	2.15667e-56	up	6.43764	1.77195e-117	3.19948e-116	up	8.29351	2.3907e-86	4.25973e-85	up	8.11064	9.36792e-82	2.94961e-80	up	NA	NA	NA	NA	-1.67873	1.60751e-07	9.89278e-07	down	1A
TraesCS1A02G295900	0.89	1.14	1.14	0.31	0	0.1	1.62	1.68	1.01	0.25	0.12	0.49	54	66	67	19	0	6	89	99	58	15	7	29	-2.53393	8.58464e-05	0.00021145	down	-2.19245	2.65462e-07	6.03843e-07	down	-1.63072	0.000494058	0.000830647	down	-3.14923	0.00995529	0.0158869	down	0.550627	0.0572721	0.108283	false	NA	NA	NA	NA	1A
TraesCS1A02G296300	0.8	0.9	0.73	1.65	2.1	1.97	0.49	0.66	0.6	2.32	1.95	2.09	97	104	86	199	239	227	54	77	69	273	231	249	1.57926	5.45897e-13	2.72446e-12	up	1.99693	3.03931e-23	1.43201e-22	up	1.6394	7.42188e-17	2.83965e-16	up	1.88654	1.22795e-16	6.14554e-16	up	-0.368809	0.152394	0.242824	false	0.101329	0.559705	0.691142	false	1A
TraesCS1A02G297400	0	0	0.08	0.32	0.36	0.58	1.11	0.85	1	1.83	1.73	1.02	0	0	4	16	17	28	51	42	48	90	86	51	NA	NA	NA	NA	0.767358	0.0159629	0.0232878	false	6.07344	1.59882e-13	5.09939e-13	up	-1.05765	0.0174115	0.0266855	down	5.29535	2.72371e-10	1.96288e-09	up	1.81679	6.6957e-06	3.43383e-05	up	1A
TraesCS1A02G297500	3.18	2.93	3.19	5.43	4.03	5.9	7.31	6.97	6.61	4.24	4.95	5.54	381	333	368	648	451	670	789	808	751	493	580	650	1.08004	1.17028e-09	4.58663e-09	up	-0.366654	0.000733256	0.00126114	false	0.917997	2.22476e-11	6.22484e-11	false	-0.256524	0.0959856	0.128169	false	1.27424	4.88046e-30	1.56568e-28	up	-0.117801	0.466364	0.610492	false	1A
TraesCS1A02G297900	6.46	5.45	6.34	13.16	12.5	12.32	5.11	5.77	8.03	13.46	12.36	13.16	344	275	325	697	622	621	245	297	405	695	643	686	1.40691	9.95698e-21	7.60539e-20	up	1.18092	4.23778e-17	1.61403e-16	up	1.34846	9.79347e-26	5.48089e-25	up	1.18897	6.63361e-13	2.60932e-12	up	0.157346	0.357922	0.476572	false	-0.0161199	0.890344	0.933943	false	1A
TraesCS1A02G298000	2.62	2.64	2.21	4.14	4.8	4.58	3.2	3.31	4.9	4.57	4.7	5.38	224	213	182	352	383	370	246	273	396	378	392	450	1.20386	2.3365e-12	1.11781e-11	up	0.499019	0.00171952	0.0028363	false	1.22646	2.39116e-15	8.46956e-15	up	0.42596	0.0180271	0.0275651	false	0.717257	8.30229e-05	0.000314979	false	0.0644211	0.649878	0.763909	false	1A
TraesCS1A02G298200	0	0	0	5.2	4.88	5.43	0	0.03	0	6.49	7.9	7.28	0	0	0	185	163	184	0	1	0	225	276	255	10.281	1.57322e-17	1.02717e-16	up	9.53884	1.35873e-15	4.85323e-15	up	10.6667	4.79632e-19	2.04438e-18	up	9.10201	4.17222e-14	1.77333e-13	up	NA	NA	NA	NA	0.428726	0.0172196	0.0445789	false	1A
TraesCS1A02G298800	177.07	136.68	174.56	117.12	95.38	110.52	251.07	276.07	252.42	74.66	77.54	82.72	5351	3912	5082	3522	2694	3164	6833	8069	7228	2188	2290	2448	-0.243394	0.0755448	0.110464	false	-1.59357	1.24242e-158	3.06064e-157	down	-0.802367	2.89611e-15	1.02147e-14	false	-1.08587	6.48564e-24	4.75116e-23	down	0.781014	4.57217e-16	5.79018e-15	false	-0.515595	1.17753e-06	6.63203e-06	false	1A
TraesCS1A02G299100	6.19	5.2	5.37	168.91	162.68	177.41	11.24	12.23	11.76	305.67	288.76	296.53	558	444	466	15144	13699	15142	912	1066	1004	26708	25424	26162	5.27453	0	0	up	4.79693	0	0	up	5.98551	0	0	up	4.03504	0	0	up	1.17802	1.72618e-27	4.94274e-26	up	0.753845	1.08244e-21	2.4271e-20	false	1A
TraesCS1A02G299200	14.86	12.2	11.44	11.1	8.75	9.04	14.35	16.17	15.01	3.24	2.08	3.06	1375	1069	1020	1022	757	792	1196	1447	1316	291	188	277	-0.0603444	0.693696	0.746596	false	-2.30542	4.21515e-75	4.97018e-74	down	-1.94596	1.63391e-35	1.21731e-34	down	-0.470961	0.000276149	0.000540038	false	0.348883	0.00121053	0.00366847	false	-1.8426	7.25926e-28	2.36495e-26	down	1A
TraesCS1A02G299600	0.3	0.37	0.43	0.18	0.21	0.16	0.6	0.29	0.58	0.01	0.12	0.14	28	33	39	17	19	14	51	27	52	1	11	13	NA	NA	NA	NA	-2.30589	8.28015e-05	0.000155821	down	NA	NA	NA	NA	-1.23506	0.0107162	0.0170149	down	0.536943	0.168894	0.264086	false	NA	NA	NA	NA	1A
TraesCS1A02G300000	0.98	0.92	1.2	6.45	6.24	4.94	1.14	1.24	1.09	5.05	5.38	5.29	101	90	120	665	604	485	106	124	107	507	545	537	2.86011	6.99267e-52	1.4329e-50	up	2.31907	5.62061e-59	5.42767e-58	up	2.59976	3.7062e-58	4.3444e-57	up	2.52892	3.58778e-48	5.60614e-47	up	0.269862	0.230788	0.338171	false	-0.218533	0.109892	0.206134	false	1A
TraesCS1A02G300100	0.41	0.34	0.13	0.24	0	0.26	0.88	1.46	0.98	0.31	0.25	0.33	27	21	8	16	0	16	52	93	61	20	16	21	NA	NA	NA	NA	-1.76685	4.85292e-06	1.0099e-05	down	NA	NA	NA	NA	-2.52024	0.0335983	0.0490166	down	2.0333	8.44435e-07	4.27259e-06	up	NA	NA	NA	NA	1A
TraesCS1A02G300200	0.02	0	0	1.48	0.94	1.39	0.28	0.2	0.27	2.44	2.23	2.93	1	0	0	92	55	82	16	12	16	148	136	179	8.10514	7.15753e-11	3.07154e-10	up	3.47506	1.47869e-27	7.85648e-27	up	8.99744	8.977e-14	2.90227e-13	up	2.53026	9.52301e-10	2.96114e-09	up	NA	NA	NA	NA	0.936921	0.000271015	0.00108493	false	1A
TraesCS1A02G300600	1.1	0.67	0.61	1.86	1.85	1.54	1.57	1.55	1	3.98	3.14	4.02	28	16	15	47	44	37	36	38	24	98	78	100	1.48712	0.0013911	0.00288268	up	1.57342	4.45295e-07	9.97461e-07	up	2.47646	8.07099e-12	2.32305e-11	up	0.531988	0.188679	0.236065	false	NA	NA	NA	NA	1.03171	0.000657763	0.0024388	up	1A
TraesCS1A02G301100	0.53	0.37	0.48	0.05	0.06	0	1.33	1.17	0.88	0.13	0.31	0.22	30	20	26	3	3	0	68	64	47	7	17	12	NA	NA	NA	NA	-2.23681	4.79803e-07	1.07242e-06	down	NA	NA	NA	NA	-4.75539	1.095e-10	3.66509e-10	down	1.39591	0.000112881	0.00041834	up	NA	NA	NA	NA	1A
TraesCS1A02G301400	52.18	39.2	44.65	26.92	20.25	20.98	68.01	74.36	77.57	10.16	10.52	9.64	4724	3361	3894	2425	1713	1799	5545	6511	6654	892	931	855	-0.643247	1.48684e-05	4.01175e-05	false	-2.72111	0	0	down	-1.91174	2.5249e-71	3.63332e-70	down	-1.50381	6.98168e-35	7.6391e-34	down	0.799232	2.77595e-16	3.58011e-15	false	-1.22477	5.14797e-22	1.18073e-20	down	1A
TraesCS1A02G302400	2.57	1.45	2.23	1.13	1.25	1.18	2.94	3.31	3.18	1.27	0.98	1	163	87	136	71	74	71	168	203	191	78	61	62	-0.468336	0.113811	0.158889	false	-1.39979	1.07606e-10	3.00198e-10	down	-0.690617	0.0160221	0.0227064	false	-1.22769	8.13056e-08	2.18924e-07	down	0.69872	0.00128855	0.00387795	false	-0.180979	0.531075	0.66688	false	1A
TraesCS1A02G302500	10.49	12.04	11.1	4.87	5.86	5.46	11.62	12.94	12.29	3.59	3.75	3.46	641	697	654	296	335	316	640	765	712	213	224	207	-0.706663	1.24573e-06	3.76892e-06	false	-1.63393	1.15448e-42	8.54255e-42	down	-1.3823	7.55278e-25	4.10025e-24	down	-1.00889	6.10873e-14	2.56836e-13	down	0.241006	0.0225097	0.0487274	false	-0.634078	7.87565e-05	0.000345505	false	1A
TraesCS1A02G302600	5.77	7.18	5.53	1.24	1.57	1.2	4.47	4.53	4.8	1.4	1.41	1.53	924	1089	853	198	235	182	644	701	728	218	220	239	-1.85547	7.19875e-31	8.23935e-30	down	-1.53252	2.71266e-39	1.88163e-38	down	-1.83515	5.7156e-42	4.93181e-41	down	-1.60328	8.24545e-28	7.11268e-27	down	-0.31339	0.00498566	0.0130393	false	0.0614579	0.731888	0.825527	false	1A
TraesCS1A02G302800	4.52	5.07	4.1	6.86	6.38	6.63	5.79	4.55	5.03	8.98	8.98	8.67	272	289	238	411	359	378	314	265	287	524	528	511	0.890694	1.07752e-07	3.60064e-07	false	0.930974	9.27209e-14	3.03389e-13	false	1.21562	5.07068e-19	2.15905e-18	up	0.554592	0.000474779	0.000902979	false	0.274166	0.0753187	0.135948	false	0.367752	0.00516858	0.0155783	false	1A
TraesCS1A02G303600	16.3	15.71	18.74	53.19	44.82	42.25	25.64	24.41	23.3	38.65	46.19	41.29	437	399	484	1419	1123	1073	619	633	592	1005	1210	1084	1.81951	5.16332e-35	6.78437e-34	up	0.919677	3.02169e-22	1.37926e-21	false	1.56808	2.09972e-40	1.74979e-39	up	1.11991	3.79971e-18	2.081e-17	up	0.638005	7.3808e-08	4.20963e-07	false	-0.208384	0.0916058	0.178593	false	1A
TraesCS1A02G303700	0.27	0.29	0.62	1.03	2.54	3.13	0.24	0.45	0.57	1.28	1.99	2.37	5	5	11	19	44	55	4	8	10	23	36	43	2.85695	4.65133e-06	1.32533e-05	up	NA	NA	NA	NA	NA	NA	NA	NA	2.58352	2.03568e-05	4.47846e-05	up	NA	NA	NA	NA	-0.294098	0.52196	0.659014	false	1A
TraesCS1A02G304900	0.17	0.16	0.25	4.24	3.2	4.47	0.28	0.12	0.32	2.55	1.8	2.41	14	13	20	357	253	358	21	10	26	209	149	200	4.73345	3.55586e-54	7.6839e-53	up	3.3707	4.81855e-28	2.5925e-27	up	3.81644	4.50448e-33	3.15812e-32	up	4.23685	1.77338e-46	2.66015e-45	up	NA	NA	NA	NA	-0.873473	9.46348e-06	4.75505e-05	false	1A
TraesCS1A02G305200	5.11	4.78	3.84	1.03	1.71	0.6	1.25	0.95	1.73	0.44	0.44	0.6	407	361	295	82	127	45	90	73	131	34	34	47	-1.70379	9.06746e-10	3.58352e-09	down	-1.27323	5.87747e-05	0.000112124	down	-2.95992	2.91813e-37	2.26674e-36	down	-0.0666668	0.848407	0.874467	false	-1.69698	1.31331e-16	1.75048e-15	down	-1.21745	0.00133831	0.00465108	down	1A
TraesCS1A02G305300	6.69	5.66	7.06	12.85	11.3	16.54	8.12	9.55	7.6	3.47	3.86	4.11	181	145	184	346	286	424	198	250	195	91	102	109	1.42092	6.05496e-12	2.81509e-11	up	-1.00794	2.39736e-07	5.47034e-07	down	-0.508769	0.0211706	0.0295319	false	0.870269	5.83338e-06	1.34936e-05	false	0.488816	0.00680035	0.0171354	false	-1.88624	1.04934e-20	2.19757e-19	down	1A
TraesCS1A02G305400	11.62	11.21	10.92	83.01	74.21	76.41	9.94	10.98	10.26	88.81	97.57	91.42	349	319	316	2482	2084	2175	269	319	292	2588	2865	2690	3.14422	7.79475e-139	6.43596e-137	up	3.29208	0	0	up	3.29639	4.09813e-266	3.66927e-264	up	3.0889	2.44528e-151	1.99891e-149	up	-0.00640486	0.96282	0.975072	false	0.195299	0.0413591	0.0931872	false	1A
TraesCS1A02G305500	5.24	5.13	4.14	0.63	1.32	0.69	1.91	2.42	1.86	0.37	0.38	0.38	354	328	269	42	83	44	116	158	119	24	25	25	-2.12839	9.49702e-16	5.63653e-15	down	-2.3253	4.12145e-15	1.43947e-14	down	-3.43524	1.62959e-41	1.39231e-40	down	-1.06861	0.000527998	0.000999252	down	-1.12018	3.95969e-10	2.80792e-09	down	-1.2677	0.00207584	0.00690818	down	1A
TraesCS1A02G305600	0.19	0.26	0.09	0.67	0.89	0.68	0.19	0.17	0.11	0.32	0.52	0.36	17	22	8	59	74	57	15	15	9	28	45	31	2.38173	9.62086e-08	3.22916e-07	up	NA	NA	NA	NA	NA	NA	NA	NA	2.43078	2.22761e-08	6.25195e-08	up	NA	NA	NA	NA	-0.946337	0.00793124	0.0227363	false	1A
TraesCS1A02G305800	3.96	4.36	3.74	1.58	1.28	0.95	2.32	2.37	2.63	0.67	0.72	0.65	477	497	434	190	144	109	252	276	300	78	85	77	-1.303	1.73317e-10	7.23054e-10	down	-1.70406	2.59387e-20	1.11134e-19	down	-2.30514	1.98082e-39	1.61945e-38	down	-0.752945	0.00038219	0.000735055	false	-0.611523	3.87007e-06	1.79218e-05	false	-0.958976	0.000187608	0.000772423	false	1A
TraesCS1A02G305900	1.47	0.99	1.3	1.8	1.9	1.73	1.68	1.37	1.43	1.91	2.15	2.32	95	61	81	116	115	106	98	86	88	120	136	147	0.875967	0.00149711	0.00308483	false	0.645914	0.00331102	0.00529067	false	1.0143	4.99861e-05	9.19053e-05	up	0.456655	0.0651842	0.0900264	false	0.358491	0.164098	0.257971	false	0.180282	0.416097	0.563245	false	1A
TraesCS1A02G306000	0.11	0.18	0	9.78	10.73	11.4	0.55	0.73	0.54	11.58	13.24	10.07	5	8	0	454	468	504	23	33	24	524	604	460	7.14569	1.71956e-59	4.18062e-58	up	4.39386	6.67799e-91	9.35358e-90	up	7.18047	7.99334e-62	9.97676e-61	up	4.30806	1.55219e-78	4.59879e-77	up	NA	NA	NA	NA	0.0773209	0.585589	0.712538	false	1A
TraesCS1A02G306300	2.64	1.86	2.29	1.45	0.94	1.16	1.55	1.84	1.73	1.07	0.63	1.14	202	135	169	110	67	84	107	136	125	79	47	85	-0.584694	0.0322723	0.0515344	false	-0.718954	0.00600539	0.00928914	false	-1.01251	0.000176294	0.000308913	down	-0.342399	0.198987	0.247753	false	-0.303809	0.142658	0.230291	false	-0.384362	0.219227	0.351686	false	1A
TraesCS1A02G306600	0.21	0.22	0.26	18.24	14.57	13.21	0.42	0.18	0.36	8.93	8.88	9.15	10	10	12	857	643	591	18	8	16	409	410	423	6.39602	5.18935e-94	2.34937e-92	up	4.9659	1.82053e-76	2.18156e-75	up	5.5255	1.45904e-75	2.24154e-74	up	5.7849	3.01732e-93	1.12708e-91	up	NA	NA	NA	NA	-0.827451	1.75921e-08	1.18421e-07	false	1A
TraesCS1A02G306700	0.53	0.5	0.55	0.05	0.28	0.35	0.69	0.51	0.82	0.25	0.3	0.31	40	36	40	4	20	25	47	37	59	18	22	23	NA	NA	NA	NA	-1.10271	0.00672118	0.0103301	down	NA	NA	NA	NA	-1.39199	0.00996375	0.0158991	down	0.458529	0.187159	0.286597	false	NA	NA	NA	NA	1A
TraesCS1A02G307800	8.75	8.24	8.17	3.41	2.5	1.94	9.17	8.81	9.99	1.43	1.2	1.49	658	587	592	255	176	138	621	641	712	104	88	110	-1.32487	3.58087e-11	1.57245e-10	down	-2.62678	1.7283e-74	2.02626e-73	down	-2.35678	2.09013e-49	2.08786e-48	down	-1.64588	1.02138e-18	5.76589e-18	down	0.259518	0.0151112	0.0345113	false	-0.988665	6.21589e-05	0.000277813	false	1A
TraesCS1A02G308000	0.41	0.27	0.72	4.21	3.84	4	1.18	1.05	1.16	4.65	4.17	4.45	24	15	41	248	212	224	63	60	65	267	241	258	3.46164	4.2892e-30	4.77678e-29	up	2.10758	5.03865e-27	2.63832e-26	up	3.5056	5.69655e-37	4.3958e-36	up	2.01321	1.47016e-19	8.69542e-19	up	1.38754	0.000251312	0.000876911	up	0.0859241	0.607577	0.730391	false	1A
TraesCS1A02G308100	6.18	6.03	5.4	7.68	9.26	8.52	4.76	4.66	5.78	11.34	10.02	10.84	599	553	504	740	838	782	415	437	531	1065	949	1028	0.878594	3.25551e-11	1.43374e-10	false	1.21988	8.63488e-32	5.10087e-31	up	1.12565	5.14664e-25	2.80878e-24	up	0.922453	2.59964e-12	9.82297e-12	false	-0.104704	0.40355	0.52265	false	0.288448	0.00910211	0.025631	false	1A
TraesCS1A02G308500	27.97	25.49	26.56	14.37	11.27	14.51	26.07	27.93	26.02	7.26	8.93	7.48	1256	1084	1149	642	473	617	1054	1213	1107	316	392	329	-0.640377	1.38996e-05	3.76427e-05	false	-1.61987	1.53212e-54	1.38805e-53	down	-1.50255	2.03499e-36	1.55339e-35	down	-0.80925	2.22116e-09	6.71846e-09	false	0.10696	0.237482	0.345939	false	-0.81824	1.60028e-07	9.84935e-07	false	1A
TraesCS1A02G308900	1.18	1.68	1.51	3.84	4.17	3.36	2.79	2.41	2.66	3.74	3.77	3.51	78	105	96	252	257	210	166	154	166	239	243	227	1.72945	7.71695e-15	4.33306e-14	up	0.625232	0.000140552	0.000259257	false	1.59138	5.14627e-15	1.7889e-14	up	0.712785	0.00014612	0.000295003	false	0.955329	6.70946e-06	3.01485e-05	false	-0.0966219	0.568678	0.698554	false	1A
TraesCS1A02G309200	14.76	17.05	16.56	5.77	9.09	7.85	12.23	12.43	12.18	5.75	5.73	5.85	804	880	869	313	463	405	600	655	629	304	305	312	-0.747104	2.67036e-06	7.80433e-06	false	-0.95084	8.12598e-18	3.18649e-17	false	-1.22453	2.30674e-24	1.22948e-23	down	-0.523501	0.000618606	0.00116086	false	-0.284397	0.00522535	0.0135828	false	-0.437246	0.00856652	0.0243049	false	1A
TraesCS1A02G309700	1.61	1.51	1.35	2.21	1.76	1.48	2.86	3.47	3.01	2.94	2.97	3.24	145	129	117	198	148	126	232	302	257	257	261	286	0.638629	0.00883516	0.0158828	false	0.10671	0.472307	0.523226	false	1.28802	9.66621e-13	2.942e-12	up	-0.593832	0.00425273	0.00716638	false	1.17073	2.68156e-11	2.14889e-10	up	0.692464	0.000420148	0.00161853	false	1A
TraesCS1A02G310300	0	0	0	0.52	0.41	0.51	0.19	0.07	0	10.57	8.53	11.33	0	0	0	37	27	34	12	5	0	728	592	788	NA	NA	NA	NA	7.01228	1.38407e-12	4.27986e-12	up	12.1465	1.46331e-24	7.86336e-24	up	NA	NA	NA	NA	NA	NA	NA	NA	4.34878	1.75277e-93	4.1025e-91	up	1A
TraesCS1A02G310500	3	2.75	2.73	10.04	8.18	9.03	4.31	3.79	4.5	13.74	12.29	12.65	267	232	234	889	680	761	345	326	379	1186	1069	1102	2.03727	3.10132e-38	4.45799e-37	up	1.75797	1.4928e-68	1.62791e-67	up	2.4436	1.95234e-96	3.98345e-95	up	1.30026	1.59357e-19	9.40517e-19	up	0.675363	2.59846e-06	1.23397e-05	false	0.449712	0.000195015	0.000800784	false	1A
TraesCS1A02G310600	1.39	1.18	1.09	0.22	0.21	0.05	1.65	1.59	1.5	0.92	1.09	0.72	112	90	85	18	16	4	120	124	115	72	86	57	-2.55345	1.93394e-08	6.87948e-08	down	-0.65841	0.00738267	0.0112855	false	-0.167168	0.552027	0.597769	false	-3.09472	1.35976e-14	5.95742e-14	down	0.480585	0.030485	0.0632888	false	2.42826	1.37358e-07	8.50027e-07	up	1A
TraesCS1A02G311000	11.4	11.42	11.42	18.89	18.15	16.74	10.17	10.51	10.82	17.8	20.83	18.08	771	731	744	1271	1147	1072	619	687	693	1167	1376	1197	1.00249	1.56555e-16	9.69514e-16	up	0.985901	7.29464e-28	3.90602e-27	false	0.982965	3.07896e-22	1.51116e-21	false	0.954542	3.33946e-17	1.72973e-16	false	-0.0133862	0.892445	0.926902	false	0.0230403	0.833725	0.896433	false	1A
TraesCS1A02G311100	0.41	0.47	0.44	1.5	0.59	0.6	0.66	0.41	0.41	0.82	0.35	0.54	35	38	36	128	47	49	51	34	33	68	29	45	1.40551	0.000946074	0.00201473	up	0.342966	0.386961	0.438327	false	0.630231	0.120702	0.150009	false	1.06619	0.0116907	0.0184498	up	NA	NA	NA	NA	-0.729677	0.0833974	0.165537	false	1A
TraesCS1A02G311200	0.2	0.65	0.24	3.02	1.83	2.99	0.45	0.45	0.4	2.63	3.16	3.72	8	24	9	118	67	111	16	17	15	100	121	143	3.22056	4.07322e-13	2.05194e-12	up	3.00304	1.34075e-19	5.60824e-19	up	3.39395	2.17527e-18	8.97405e-18	up	2.77725	6.39483e-13	2.51801e-12	up	NA	NA	NA	NA	0.218783	0.419067	0.566111	false	1A
TraesCS1A02G311300	6.26	3.35	5.61	1.86	1.74	2.82	4.96	6.47	5.33	1.48	2.06	2.11	227	115	196	67	59	97	162	227	183	52	73	75	-0.896846	0.00335977	0.00652201	false	-1.43234	3.25128e-10	8.81993e-10	down	-1.17865	2.65734e-05	4.99412e-05	down	-1.20222	3.15798e-06	7.47549e-06	down	0.243995	0.273208	0.386565	false	-0.238536	0.448356	0.593478	false	1A
TraesCS1A02G311900	3.27	2.52	3.1	2.13	2.04	1.46	6.02	4.97	5.34	3.03	2.57	2.51	218	159	199	141	127	92	361	320	337	196	167	164	-0.3123	0.196459	0.256597	false	-0.870216	2.23217e-08	5.43198e-08	false	0.120849	0.539674	0.585852	false	-1.35376	9.99926e-12	3.62508e-11	down	0.980451	9.61338e-10	6.56953e-09	false	0.474802	0.0331365	0.0775967	false	1A
TraesCS1A02G312000	8.65	9.26	11.68	3.44	4.2	4.3	9.9	8.47	8.7	2.31	2.17	1.72	359	364	467	142	163	169	370	340	342	93	88	70	-0.962385	8.42966e-07	2.59424e-06	false	-1.98747	9.87171e-29	5.4103e-28	down	-1.99884	1.16924e-23	6.07667e-23	down	-1.00134	1.3898e-08	3.96601e-08	down	-0.0222166	0.87933	0.917835	false	-0.995078	2.14294e-05	0.000102593	false	1A
TraesCS1A02G312400	0.18	0.21	0.01	1.48	1.99	1.52	0.12	0.04	0.28	3.49	3.82	3.99	14	15	1	112	142	110	8	3	20	258	285	298	3.9694	2.95182e-19	2.09679e-18	up	4.84443	2.9448e-16	1.08139e-15	up	5.06096	1.06317e-11	3.03773e-11	up	3.70403	6.56265e-18	3.54244e-17	up	NA	NA	NA	NA	1.13066	2.95122e-09	2.12326e-08	up	1A
TraesCS1A02G312700	2.83	2.74	2.91	6.75	5.77	5.94	1.9	2.19	2.22	6.02	5.73	5.22	192	176	190	456	366	382	116	144	143	396	380	347	1.47695	5.27053e-17	3.35039e-16	up	1.56209	7.87689e-24	3.77665e-23	up	1.25687	6.28012e-16	2.29438e-15	up	1.73135	2.1361e-22	1.46054e-21	up	-0.315928	0.0872792	0.153871	false	-0.177175	0.229635	0.36424	false	1A
TraesCS1A02G312800	0.59	1.12	0.88	4.52	3.21	5.84	2.6	1.68	2.21	7.77	10.52	7.47	19	34	27	144	96	177	75	52	67	241	329	234	2.75188	2.9861e-15	1.72307e-14	up	2.1292	1.71834e-22	7.91304e-22	up	3.57452	2.19177e-40	1.82575e-39	up	1.25441	2.25533e-05	4.94144e-05	up	1.43463	6.75956e-05	0.000260289	up	0.867291	0.000194437	0.000798641	false	1A
TraesCS1A02G313300	112.36	98.95	103.27	127.77	163	169.31	115.16	115.69	102.21	56.82	60.09	65.91	8566	7145	7585	9693	11615	12228	7907	8531	7384	4201	4477	4921	0.894539	7.10887e-15	4.00572e-14	false	-0.72838	3.08119e-30	1.74878e-29	false	-0.528713	7.80978e-11	2.11151e-10	false	0.644127	6.9105e-10	2.17428e-09	false	0.189251	0.0152385	0.034771	false	-1.38184	4.82957e-41	2.69879e-39	down	1A
TraesCS1A02G313700	0.75	1.09	1.1	1.23	1.3	0.9	0.96	0.93	1	1.98	2.04	1.97	101	139	143	165	164	115	117	121	128	259	269	260	0.574782	0.0232365	0.0383138	false	1.18788	1.265e-12	3.92082e-12	up	1.28584	3.47304e-11	9.60143e-11	up	0.426777	0.0630896	0.0873999	false	0.0869085	0.690862	0.777228	false	0.751958	8.78126e-05	0.00038256	false	1A
TraesCS1A02G314300	4.63	5.91	4.51	8.26	7.11	7.2	6.51	5.91	5.83	9.27	8.6	9.16	247	299	232	439	355	364	313	305	295	480	449	479	0.940669	1.4325e-07	4.73457e-07	false	0.705282	6.50049e-09	1.63458e-08	false	1.10268	6.14743e-14	2.00557e-13	up	0.491876	0.00170314	0.0030267	false	0.386579	0.0116492	0.0274927	false	0.204962	0.14341	0.254687	false	1A
TraesCS1A02G314500	2.01	2.21	2.5	0.48	0.04	0.85	3.88	5.82	4.41	0.21	0.53	0.21	50	52	60	12	1	20	87	140	104	5	13	5	-1.91789	0.00161641	0.00331467	down	-3.761	2.45967e-18	9.8163e-18	down	-2.57056	1.09913e-06	2.29821e-06	down	-3.16333	4.9368e-11	1.70077e-10	down	1.1808	1.09926e-05	4.78611e-05	up	NA	NA	NA	NA	1A
TraesCS1A02G314800	0.75	0.73	1.04	0.67	0.42	0.68	1.14	1.47	1.64	0.83	1.31	1.16	27	25	36	24	14	23	37	51	56	29	46	41	NA	NA	NA	NA	-0.227306	0.526794	0.576257	false	NA	NA	NA	NA	-1.08231	0.0146393	0.0227096	down	0.860947	0.0199847	0.0440053	false	NA	NA	NA	NA	1A
TraesCS1A02G314900	7.84	6.28	9.6	8.04	9.42	8.28	14.82	13.85	13.79	12.32	15.64	17.13	195	148	230	199	219	195	332	333	325	297	380	417	0.462894	0.0325786	0.0519617	false	0.223841	0.116162	0.147274	false	1.1789	4.76669e-10	1.22402e-09	up	-0.542641	0.000952461	0.00174482	false	0.944988	2.48207e-08	1.483e-07	false	0.757339	1.20435e-05	5.97107e-05	false	1A
TraesCS1A02G315300	6.62	5.52	6.89	0.65	0.65	1.17	5.64	6.56	5.32	0.27	0.3	0.23	357	282	358	35	33	60	274	342	272	14	16	12	-2.59012	1.82704e-22	1.50287e-21	down	-4.31926	3.26746e-51	2.80592e-50	down	-4.32121	2.09996e-48	2.05917e-47	down	-2.63943	6.32331e-25	4.84067e-24	down	-0.0123049	0.93552	0.957133	false	NA	NA	NA	NA	1A
TraesCS1A02G315500	11.47	11.11	12.24	2.74	4.79	3.59	11.23	9.25	10.49	3.95	5.24	4.77	749	687	770	178	292	222	660	584	649	250	334	305	-1.30798	2.13756e-13	1.09524e-12	down	-1.01146	5.82009e-15	2.01949e-14	down	-1.06458	4.62015e-15	1.61079e-14	down	-1.30489	7.49709e-14	3.13602e-13	down	-0.0636014	0.562278	0.670178	false	0.28318	0.154671	0.269783	false	1A
TraesCS1A02G316100	5.59	4.85	4.56	3.45	3.81	4.33	2.36	2.3	2.26	1.97	1.21	1.13	460	378	362	283	293	338	175	183	176	157	97	91	-0.0226552	0.894809	0.917054	false	-0.547619	0.014608	0.0214328	false	-1.54754	1.23879e-13	3.97411e-13	down	0.926734	1.37199e-07	3.62781e-07	false	-1.01082	2.29195e-11	1.84951e-10	down	-1.48328	1.33643e-11	1.21903e-10	down	1A
TraesCS1A02G317100	1.4	1.97	2.34	0.68	1.49	1.33	0.52	0.22	0.51	0.02	0.12	0.14	72	96	116	35	72	65	24	11	25	1	6	7	-0.360585	0.304098	0.373829	false	NA	NA	NA	NA	-4.10004	1.36018e-14	4.61125e-14	down	1.6652	0.000276378	0.00054045	up	-2.08685	1.37149e-08	8.41992e-08	down	-3.70029	3.98774e-10	3.13217e-09	down	1A
TraesCS1A02G317800	0.57	0.65	0.59	0.1	0.19	0.17	0.31	0.28	0.27	0.15	0.11	0.07	79	85	79	14	25	22	39	37	35	20	15	9	-1.62821	4.10102e-05	0.00010515	down	NA	NA	NA	NA	-2.21697	4.72258e-08	1.07629e-07	down	NA	NA	NA	NA	-0.974319	0.00107287	0.00328442	false	NA	NA	NA	NA	1A
TraesCS1A02G319000	0.49	0.47	0.55	1.87	1.67	1.84	0.48	0.4	0.69	0.85	1.07	1.27	33	30	36	126	106	118	29	26	44	56	71	84	2.18945	1.18492e-12	5.77692e-12	up	1.17311	0.00061491	0.00106548	up	1.33754	0.000103177	0.000184619	up	1.97403	2.80088e-10	9.08551e-10	up	NA	NA	NA	NA	-0.808815	0.00205879	0.00685615	false	1A
TraesCS1A02G319300	0.52	0.93	1.57	7.06	6.63	7.94	0.99	0.92	0.62	2.51	1.95	2.01	32	54	93	432	381	463	55	55	36	150	117	121	3.19686	3.7805e-32	4.51884e-31	up	1.48975	2.57123e-08	6.23544e-08	up	1.35853	3.34127e-05	6.22909e-05	up	3.2774	5.49299e-52	9.38475e-51	up	-0.142616	0.709818	0.792124	false	-1.79568	2.05834e-24	5.50337e-23	down	1A
TraesCS1A02G319400	9.54	6.87	7.41	3.26	2.65	3.18	14.2	16.62	15.35	1.69	2.03	1.1	424	289	317	144	110	134	568	714	646	73	88	48	-1.03741	1.47343e-06	4.42854e-06	down	-3.12135	1.14057e-72	1.30714e-71	down	-2.05031	1.09666e-18	4.59177e-18	down	-2.15967	9.6768e-39	1.18258e-37	down	1.06046	3.26599e-14	3.48302e-13	up	-0.969303	0.00046034	0.00175935	false	1A
TraesCS1A02G319500	11.84	4.12	8.25	13.11	5.53	12.27	35.29	32.01	29.98	21.41	19.18	16.99	158	52	106	174	69	155	424	413	379	277	250	222	0.71101	0.0586936	0.0882565	false	-0.61877	1.11549e-05	2.25832e-05	false	1.49837	5.33252e-08	1.21148e-07	up	-1.45914	5.27803e-09	1.55233e-08	down	2.10844	6.32443e-07	3.24514e-06	up	0.834074	0.00158699	0.00542257	false	1A
TraesCS1A02G320900	0.12	0.07	0.12	0.74	0.4	0.84	0.36	0.5	0.32	0.91	1.09	1.07	16	9	16	99	51	107	44	65	41	119	144	142	3.02161	8.1684e-12	3.7592e-11	up	1.51595	4.79121e-09	1.21548e-08	up	3.55159	9.84686e-25	5.3243e-24	up	0.933705	0.00866496	0.0139572	false	2.02517	3.32338e-06	1.55441e-05	up	0.576018	0.0406886	0.0919849	false	1A
TraesCS1A02G321000	2.39	1.54	1.35	5.59	4.75	5.79	2.02	2.36	2.2	11.96	13.62	10.83	134	82	73	312	249	308	102	128	117	651	747	595	1.9614	4.20692e-16	2.54311e-15	up	2.60497	1.75441e-72	2.00793e-71	up	3.03673	4.85002e-60	5.86355e-59	up	1.47785	6.55025e-14	2.74943e-13	up	0.421933	0.094713	0.16474	false	1.11972	6.43439e-14	7.4296e-13	up	1A
TraesCS1A02G321100	1.11	1.09	0.87	1.77	1.57	1.56	1.88	2.35	1.98	1.26	1.47	1.16	78	73	59	124	103	104	119	160	132	86	101	80	1.02485	0.000223685	0.000521274	up	-0.538331	0.0166948	0.0242949	false	0.595015	0.0313407	0.0427261	false	-0.159799	0.496131	0.554475	false	1.12273	1.58099e-06	7.7323e-06	up	-0.386744	0.119214	0.220092	false	1A
TraesCS1A02G321700	0.59	0.45	0.62	1.26	1.16	1.19	1.12	0.92	1.18	2.31	2.87	2.21	66	48	67	140	121	126	112	99	125	250	312	241	1.46411	1.1356e-07	3.78678e-07	up	1.33761	5.47248e-13	1.72641e-12	up	2.39718	1.98522e-27	1.17576e-26	up	0.353512	0.130432	0.169373	false	1.04967	4.04887e-05	0.000162021	up	0.975917	4.68667e-07	2.76761e-06	false	1A
TraesCS1A02G322300	17.89	19.3	18.94	5.42	6.53	6.3	14.05	12.44	13.56	5.57	5.9	5.65	2128	2174	2170	641	726	710	1505	1431	1528	642	686	658	-1.27314	4.40053e-29	4.7312e-28	down	-1.08822	6.89145e-40	4.84277e-39	down	-1.45751	6.2623e-61	7.69318e-60	down	-0.954508	4.43406e-18	2.41795e-17	false	-0.379919	2.15263e-06	1.03476e-05	false	-0.142813	0.223946	0.357436	false	1A
TraesCS1A02G322700	0.03	0.22	0.11	0.02	0.1	0.24	2.52	1.82	2.3	2.86	2.61	2.77	3	24	12	2	11	26	257	200	247	315	289	308	NA	NA	NA	NA	0.45208	0.00334344	0.00533733	false	4.78715	2.25681e-13	7.13784e-13	up	-4.01684	1.11971e-06	2.75045e-06	down	4.32309	2.82599e-10	2.03441e-09	up	4.45882	3.99817e-08	2.60776e-07	up	1A
TraesCS1A02G322900	0.67	0.91	0.74	0.28	0.41	0.75	0.5	0.18	0.2	0.05	0.13	0.13	43	56	46	18	25	46	29	11	12	3	8	8	-0.33254	0.466689	0.537485	false	NA	NA	NA	NA	-2.68758	1.43774e-06	2.98156e-06	down	NA	NA	NA	NA	-1.31392	0.00371303	0.0100345	down	NA	NA	NA	NA	1A
TraesCS1A02G323000	3.13	3.35	4.26	7.67	7.57	7.1	2.23	2.28	2.67	6.72	5.63	7.23	239	242	313	582	540	513	153	168	193	497	420	540	1.40703	2.98387e-17	1.92037e-16	up	1.58556	4.01211e-27	2.10617e-26	up	1.12149	1.9906e-12	5.94126e-12	up	1.82069	6.42572e-32	6.45836e-31	up	-0.474843	0.00756801	0.0188059	false	-0.243777	0.0724789	0.147668	false	1A
TraesCS1A02G323500	0.16	0.18	0.07	0.03	0.05	0.06	0.06	0.09	0.1	0.01	0.03	0.02	49	53	21	8	15	16	17	28	28	3	10	5	-1.28587	0.0230841	0.0380924	down	NA	NA	NA	NA	-2.52353	6.66314e-05	0.000121127	down	NA	NA	NA	NA	-0.599971	0.176363	0.273334	false	NA	NA	NA	NA	1A
TraesCS1A02G323600	14.5	21.19	16.97	4.97	6.7	4.18	11.8	9.9	9.74	2.15	1.73	1.68	1637	2266	1846	559	707	447	1200	1081	1042	236	191	186	-1.38559	4.49625e-17	2.86932e-16	down	-2.35939	1.34235e-82	1.71798e-81	down	-2.98329	6.62675e-99	1.39655e-97	down	-0.811731	6.91995e-08	1.87281e-07	false	-0.635311	1.04332e-07	5.85869e-07	false	-1.55759	2.79745e-18	4.86784e-17	down	1A
TraesCS1A02G323800	1.43	1.33	1.76	0.22	0.49	0.54	1.7	1.63	1.72	0.28	0.35	0.42	59	52	70	9	19	21	63	65	67	11	14	17	-1.51802	0.00111866	0.00235626	down	-2.1344	8.26015e-08	1.94249e-07	down	-1.86184	1.94758e-05	3.70656e-05	down	-1.84085	1.85618e-05	4.10124e-05	down	0.262376	0.357073	0.475732	false	NA	NA	NA	NA	1A
TraesCS1A02G323900	34.91	33.65	34.16	6.65	8.32	7.82	24	22.51	20.6	7.47	7.67	8.09	1956	1786	1844	371	436	415	1211	1220	1094	406	420	444	-1.82544	4.07063e-50	7.98916e-49	down	-1.39291	5.04329e-47	4.03625e-46	down	-1.88951	1.1787e-84	2.06219e-83	down	-1.37955	1.80148e-28	1.5943e-27	down	-0.507238	4.3493e-09	2.80186e-08	false	-0.0227671	0.86923	0.920325	false	1A
TraesCS1A02G325400	6.27	5.2	5.69	39.9	44.2	41.68	5.75	5.93	5.81	39.47	39.22	39.87	541	425	473	3425	3563	3406	447	495	475	3302	3306	3368	3.22046	4.1462e-173	5.0678e-171	up	2.89737	0	0	up	3.04169	1.73906e-238	1.27108e-236	up	3.02545	5.85677e-221	1.01345e-218	up	0.133989	0.272494	0.385713	false	-0.136918	0.0827686	0.164598	false	1A
TraesCS1A02G325500	6.73	4.19	4.26	20.39	13.68	13.7	8.52	8.41	8.51	15.18	12.69	17.42	635	374	387	1914	1206	1224	724	767	761	1389	1170	1609	2.00923	1.83472e-23	1.57801e-22	up	0.9692	1.63246e-21	7.27925e-21	false	1.82957	4.12222e-11	1.13385e-10	up	1.09749	1.48116e-12	5.68905e-12	up	0.850059	3.70282e-08	2.179e-07	false	-0.135856	0.38834	0.536506	false	1A
TraesCS1A02G325600	47.18	47.06	45.75	135.76	116.68	148.71	60.21	59.09	60.2	154.96	160.79	142.54	1721	1626	1608	4928	3978	5139	1978	2085	2081	5482	5732	5092	1.87299	3.39892e-53	7.18692e-52	up	1.48984	5.97802e-142	1.3031e-140	up	1.9663	1.39157e-145	4.78127e-144	up	1.34515	1.5824e-34	1.71197e-33	up	0.465899	3.35297e-10	2.39789e-09	false	0.13691	0.197236	0.324522	false	1A
TraesCS1A02G325800	0.23	0.23	0.22	3.18	2.89	3.03	1.8	1.59	1.84	0.48	0.67	0.54	21	20	19	286	244	259	146	139	157	42	59	48	4.0848	2.64299e-48	4.98026e-47	up	-1.48826	1.5872e-09	4.14306e-09	down	1.55939	0.000154731	0.000272391	up	0.986047	1.1768e-07	3.12952e-07	false	3.03729	8.01587e-26	2.06804e-24	up	-2.48229	2.59221e-28	8.57711e-27	down	1A
TraesCS1A02G326100	13.43	11.76	11.92	17.84	15.56	20.7	27.77	26.72	24.92	11.92	10.92	12.1	662	549	566	875	717	967	1233	1274	1164	570	526	584	0.89719	3.72877e-09	1.40095e-08	false	-1.04714	1.73808e-31	1.01846e-30	down	0.167468	0.164748	0.199521	false	-0.368965	0.0046013	0.0077095	false	1.20405	5.49423e-33	2.01878e-31	up	-0.686339	3.58799e-07	2.14274e-06	false	1A
TraesCS1A02G326900	13.45	13.25	13.55	18.16	19.37	20.08	11.66	10.32	10.99	21.34	23.85	21.84	938	875	910	1260	1262	1326	732	696	726	1443	1625	1491	0.866668	3.32501e-14	1.79118e-13	false	1.16195	1.82421e-44	1.39571e-43	up	0.990837	4.70831e-27	2.75133e-26	false	0.986765	9.85443e-20	5.89161e-19	false	-0.181516	0.0613291	0.114636	false	0.166449	0.0916077	0.178593	false	1A
TraesCS1A02G327000	0.81	1.12	0.86	0.32	0.53	0.34	0.76	0.9	0.73	0.3	0.4	0.21	87	113	88	34	53	34	73	93	74	31	42	22	-0.888233	0.00910487	0.0163296	false	-1.25346	0.000175656	0.000321126	down	-1.35337	7.57954e-05	0.000137151	down	-0.838623	0.0128674	0.0201658	false	-0.110505	0.659981	0.752956	false	NA	NA	NA	NA	1A
TraesCS1A02G327100	1.32	1.02	1	0.75	0.72	0.63	2.3	2.11	2.39	2.53	2.54	2.22	86	63	63	49	44	39	135	133	148	160	162	142	-0.315031	0.364501	0.436582	false	0.239017	0.208915	0.251833	false	1.37963	8.7213e-09	2.07652e-08	up	-1.5067	3.81461e-08	1.05107e-07	down	1.13029	9.40759e-07	4.7299e-06	up	1.73715	2.35827e-11	2.10406e-10	up	1A
TraesCS1A02G328100	21.73	16.29	18.48	5.98	3.32	5.71	26.97	29.78	24.79	2.04	2.21	1.66	924	656	757	253	132	230	1033	1225	999	84	92	69	-1.55292	4.43547e-13	2.22721e-12	down	-3.65035	4.94266e-146	1.11448e-144	down	-3.00412	4.42449e-66	5.89455e-65	down	-2.25124	1.5097e-33	1.58999e-32	down	0.635765	9.72245e-08	5.48255e-07	false	-1.40576	8.403e-08	5.30388e-07	down	1A
TraesCS1A02G328400	11.43	12.5	11.63	5.77	8.45	5.06	11.17	9.96	11.75	5.87	4.54	3.96	840	870	823	422	580	352	739	708	818	418	326	285	-0.541107	0.00116883	0.00245344	false	-1.05631	1.98204e-15	7.0216e-15	down	-1.05126	1.2294e-13	3.94449e-13	down	-0.595741	0.000236394	0.000466179	false	-0.00581662	0.954238	0.969329	false	-0.470554	0.0135166	0.0362341	false	1A
TraesCS1A02G328700	0.54	0.62	0.53	0.15	0.36	0.21	0.77	0.6	0.41	0.15	0.14	0.21	63	69	60	17	39	23	81	68	45	17	16	24	-0.918458	0.0286806	0.0463316	false	-1.69236	2.3236e-05	4.58736e-05	down	-1.50579	0.000165295	0.000290325	down	-1.15497	0.00649584	0.0106514	down	0.174896	0.564765	0.672407	false	NA	NA	NA	NA	1A
TraesCS1A02G329200	4.87	4.81	4.04	6.37	7.77	6.61	4.51	4.31	4.32	7.75	8.39	7.47	607	568	486	791	906	781	507	520	510	937	1023	912	0.944135	4.67931e-12	2.19471e-11	false	0.983042	1.44052e-25	7.25735e-25	false	1.03836	7.23496e-20	3.19824e-19	up	0.838067	4.24165e-12	1.58033e-11	false	0.0448581	0.701841	0.786126	false	0.135709	0.229531	0.364115	false	1A
TraesCS1A02G329400	1.59	2.37	1.37	0.76	0.89	0.81	1.15	1.04	1.21	0.67	0.68	0.82	668	945	556	317	350	323	434	423	481	274	279	339	-0.765401	4.3942e-05	0.000112243	false	-0.504377	0.000135166	0.000249737	false	-1.03601	3.62343e-09	8.82717e-09	down	-0.284811	0.0482552	0.0683698	false	-0.542565	0.000686726	0.00219101	false	-0.228686	0.142588	0.253548	false	1A
TraesCS1A02G329500	0.53	0.41	1.1	12.38	10.71	12.65	1.78	2.02	2.38	6.47	6.15	7.56	40	29	79	922	749	897	120	146	169	470	450	554	4.48178	1.32639e-26	1.29881e-25	up	1.84388	6.66895e-34	4.13318e-33	up	3.56061	7.25592e-50	7.33106e-49	up	2.71557	1.11741e-65	2.58644e-64	up	1.70529	2.12638e-08	1.28061e-07	up	-0.879602	3.32334e-11	2.91545e-10	false	1A
TraesCS1A02G329600	0	0.04	0	3.23	4.8	3.59	0.02	0.01	0.04	1.68	1.31	1.66	0	6	0	455	636	482	2	1	5	231	181	230	8.39285	1.12449e-10	4.75405e-10	up	6.40824	5.41728e-31	3.13463e-30	up	6.98146	7.60303e-08	1.71103e-07	up	7.76827	9.9958e-47	1.50836e-45	up	NA	NA	NA	NA	-1.37024	1.17784e-15	1.59778e-14	down	1A
TraesCS1A02G330100	32.28	36.28	34.14	38.66	27.27	33.99	18.94	19.02	17.66	17.59	15.04	13.89	793	844	808	945	626	791	419	452	411	419	361	334	0.318604	0.0425716	0.0661236	false	-0.120772	0.345489	0.396356	false	-0.886553	2.08044e-12	6.20209e-12	false	1.03286	2.76146e-11	9.71685e-11	up	-0.776653	6.5429e-13	6.16504e-12	false	-1.16107	2.24726e-13	2.45769e-12	down	1A
TraesCS1A02G330200	0.35	0.37	0.35	0.74	1.07	1.15	0.19	0.32	0.7	0.96	1.29	1.28	26	26	25	55	74	81	13	23	49	69	94	93	1.81558	1.56945e-06	4.70325e-06	up	1.67986	1.31167e-05	2.64096e-05	up	1.97954	5.05075e-09	1.22033e-08	up	1.46642	0.000706899	0.0013173	up	NA	NA	NA	NA	0.205649	0.480033	0.622919	false	1A
TraesCS1A02G330700	20.08	23.69	22.1	6.3	7.34	8.61	13.15	13.03	12.23	4.3	4.8	4.82	1511	1688	1602	472	516	614	891	948	872	314	353	355	-1.21555	1.33721e-18	9.20303e-18	down	-1.32658	7.54717e-38	5.08143e-37	down	-1.98585	1.06868e-74	1.61936e-73	down	-0.607283	5.54754e-06	1.28603e-05	false	-0.670019	2.27417e-13	2.24708e-12	false	-0.728228	1.02666e-06	5.82368e-06	false	1A
TraesCS1A02G330800	0.95	0.91	1.07	0.35	0.27	0.25	0.26	0.3	0.25	0.23	0.15	0.1	60	54	65	22	16	15	15	18	15	14	9	6	-1.38976	0.00148218	0.00305599	down	NA	NA	NA	NA	-2.37715	7.2989e-07	1.54317e-06	down	NA	NA	NA	NA	-1.74439	7.62081e-06	3.39509e-05	down	NA	NA	NA	NA	1A
TraesCS1A02G331000	3.76	2.31	2.74	1.58	2.17	1.13	1.52	2.63	2.36	1.1	1.61	0.88	74	43	52	31	40	21	27	50	44	21	31	17	-0.511605	0.225449	0.289062	false	-0.721798	0.0969584	0.124765	false	-1.04146	0.0136709	0.0195595	down	-0.242143	0.580751	0.635173	false	-0.328836	0.351982	0.470289	false	NA	NA	NA	NA	1A
TraesCS1A02G332200	27.23	25.64	26.03	13.57	11.82	12.6	28.35	29.01	29.02	6.89	7.3	7.02	1896	1691	1746	940	769	831	1778	1954	1915	465	497	479	-0.701808	1.08973e-08	3.95096e-08	false	-1.8885	2.0511e-126	3.97943e-125	down	-1.64007	1.87507e-64	2.43884e-63	down	-1.00139	3.1718e-20	1.94611e-19	down	0.23797	0.00199856	0.00576385	false	-0.895194	3.23865e-13	3.48388e-12	false	1A
TraesCS1A02G332500	3.39	2.78	2.32	1.45	1.25	0.7	2.66	3.69	4.3	0.97	1.2	1.32	188	146	124	80	65	37	133	198	226	52	65	72	-0.965147	0.00194293	0.00393006	false	-1.47294	1.40892e-09	3.6903e-09	down	-1.02788	8.96954e-05	0.000161306	down	-1.46092	5.90394e-07	1.48373e-06	down	0.435301	0.0438889	0.0864163	false	-0.0201197	0.9531	0.971766	false	1A
TraesCS1A02G333200	1.28	1.58	1.13	1.39	1.49	1.65	2.02	1.84	1.8	2.25	1.99	2.55	91	106	77	98	99	111	129	126	121	155	138	177	0.537061	0.0474963	0.0729503	false	0.40185	0.0423021	0.0579723	false	1.02547	9.7917e-06	1.90862e-05	up	-0.13783	0.559142	0.614683	false	0.612829	0.00648951	0.0164514	false	0.530736	0.0172934	0.0447415	false	1A
TraesCS1A02G333700	19.47	19.03	18.4	25.73	26.31	25.15	16.31	14.58	14.93	33.73	31.78	33.27	1211	1121	1103	1593	1530	1482	914	877	880	2035	1932	2027	0.790264	3.78512e-13	1.90974e-12	false	1.24642	5.2659e-65	5.49533e-64	up	1.05107	2.84462e-36	2.16247e-35	up	0.934576	8.17096e-20	4.90686e-19	false	-0.205815	0.0244768	0.0524249	false	0.302927	0.000664176	0.002461	false	1A
TraesCS1A02G333900	30.34	27.89	30.2	14.84	14.37	14.81	40.81	39.39	38.91	23.64	24.14	26.11	2322	2022	2227	1130	1028	1074	2813	2916	2822	1755	1806	1957	-0.655788	5.8424e-09	2.16319e-08	false	-0.551235	6.01248e-19	2.45522e-18	false	-0.00453346	0.957324	0.964102	false	-1.25352	3.55571e-40	4.53038e-39	down	0.53628	1.09885e-12	1.01414e-11	false	0.693706	8.60147e-13	8.9007e-12	false	1A
TraesCS1A02G334100	0.77	0.28	0.58	7.55	3.21	4.04	1.33	2.28	1.57	4.03	4.29	4.96	29	10	21	283	113	144	45	83	56	147	158	183	3.54147	3.34077e-19	2.3651e-18	up	1.49272	1.30763e-09	3.43011e-09	up	3.27312	2.24718e-24	1.19837e-23	up	1.70879	2.35232e-07	6.10411e-07	up	1.77047	1.83733e-05	7.76318e-05	up	-0.22147	0.422639	0.569617	false	1A
TraesCS1A02G334400	0.1	0.09	0.12	0.76	0.59	0.71	0.66	0.35	0.39	1.99	1.81	1.91	7	6	8	54	39	48	42	24	26	137	126	133	3.11555	6.78316e-09	2.49735e-08	up	2.18127	4.98212e-14	1.65451e-13	up	4.48441	7.07169e-28	4.2486e-27	up	0.759206	0.0669259	0.0922285	false	NA	NA	NA	NA	1.41216	1.57738e-07	9.7136e-07	up	1A
TraesCS1A02G334800	0	0	0	0	0	0	14.84	15.56	14.64	26.33	26.68	24.81	0	0	0	0	0	0	1072	1207	1113	2048	2091	1949	NA	NA	NA	NA	0.925916	7.22031e-40	5.07148e-39	false	13.6768	5.60405e-31	3.70786e-30	up	-12.4347	9.17216e-26	7.28412e-25	down	12.7402	4.62887e-27	1.29091e-25	up	13.352	1.47935e-29	5.15157e-28	up	1A
TraesCS1A02G334900	2.61	2.29	2.21	0.31	0.36	0.13	7.36	6.94	7.35	1.9	1.9	1.84	321	267	262	38	41	15	816	827	858	227	229	222	-2.81311	2.03103e-21	1.59957e-20	down	-1.802	5.03932e-60	4.93182e-59	down	-0.0774802	0.633693	0.675309	false	-4.58635	2.41581e-99	9.98155e-98	down	1.71388	2.72158e-49	1.79911e-47	up	2.77638	1.29675e-22	3.1182e-21	up	1A
TraesCS1A02G335100	0	0	0	0	0	0	0	0	0	0.61	1.02	0.73	0	0	0	0	0	0	0	0	0	38	64	46	NA	NA	NA	NA	8.1477	9.43774e-11	2.64108e-10	up	8.31356	4.97374e-11	1.36259e-10	up	NA	NA	NA	NA	NA	NA	NA	NA	7.98933	3.2084e-10	2.54524e-09	up	1A
TraesCS1A02G335200	0.27	0.14	0.46	2.51	1.29	2.15	0.06	0.09	0.02	0	0	0	16	8	27	151	73	123	3	5	1	0	0	0	3.13533	1.13753e-13	5.93614e-13	up	NA	NA	NA	NA	NA	NA	NA	NA	5.42183	7.66151e-20	4.60913e-19	up	NA	NA	NA	NA	-9.37436	2.20683e-14	2.65387e-13	down	1A
TraesCS1A02G335700	0.81	0.83	0.85	0.73	0.96	0.8	0.4	0.23	0.17	0.24	0.2	0.25	133	130	135	120	148	124	59	37	26	39	32	40	0.343563	0.13826	0.188575	false	NA	NA	NA	NA	-1.59507	1.51487e-08	3.55571e-08	down	1.8244	1.19716e-08	3.43368e-08	up	-1.54308	1.52094e-07	8.38246e-07	down	-1.8979	1.55117e-11	1.40726e-10	down	1A
TraesCS1A02G335800	3	3.4	3.21	0.98	1.07	1.27	1.65	1.01	0.93	0.17	0.14	0.1	159	171	164	52	53	64	79	52	47	9	7	5	-1.17962	8.86918e-06	2.45626e-05	down	-3.00958	1.93813e-09	5.03201e-09	down	-4.30883	2.55378e-26	1.45557e-25	down	0.0692137	0.842433	0.869386	false	-1.31196	1.26125e-07	7.01223e-07	down	-3.08698	6.69693e-10	5.13785e-09	down	1A
TraesCS1A02G337000	7.78	7.15	6.5	18.22	14.91	15.06	6.34	7.23	8.15	10.04	13.4	8.86	139	121	112	324	249	255	102	125	138	174	234	155	1.52274	2.53026e-13	1.2894e-12	up	0.70944	0.000729609	0.00125516	false	0.846442	0.000117272	0.00020876	false	1.33439	4.11037e-11	1.42503e-10	up	0.126855	0.550388	0.659661	false	-0.632683	0.00146487	0.00504467	false	1A
TraesCS1A02G337800	26.13	26.82	29.1	38.1	40.48	43.15	26.08	24.87	23.29	45.07	46.81	45.6	1437	1397	1542	2085	2081	2248	1292	1323	1214	2404	2516	2456	0.918946	9.06988e-17	5.69445e-16	false	1.02642	5.94385e-53	5.2393e-52	up	1	1.87624e-34	1.36154e-33	up	0.894386	4.85316e-19	2.78423e-18	false	-0.0369803	0.67568	0.765259	false	0.123222	0.164969	0.283104	false	1A
TraesCS1A02G337900	0	0	0	0.82	0.77	0.56	0.01	0.08	0.01	3.62	3.66	2.52	0	0	0	63	56	41	1	6	1	273	278	192	8.54408	1.40834e-11	6.36526e-11	up	6.62122	7.61732e-33	4.60981e-32	up	10.6432	7.32535e-19	3.09591e-18	up	4.47469	6.41452e-11	2.1893e-10	up	NA	NA	NA	NA	2.14055	4.65024e-18	7.92052e-17	up	1A
TraesCS1A02G338200	1.32	1.25	1.23	1.58	1.3	0.98	0.58	0.67	0.53	1	0.77	0.91	211	189	190	252	195	148	84	103	80	155	120	142	0.377757	0.091678	0.131293	false	0.725674	0.00119783	0.00201077	false	-0.252332	0.203005	0.24182	false	1.30473	1.12073e-07	2.98472e-07	up	-0.988642	8.53634e-07	4.31543e-06	false	-0.587595	0.00917832	0.0258137	false	1A
TraesCS1A02G338300	7.12	8.48	7.12	10.5	12.04	10.63	4.12	3.44	3.62	7.34	8.02	9.29	415	468	400	609	656	587	216	194	200	415	457	530	0.89542	2.68243e-10	1.10202e-09	false	1.27955	2.37032e-19	9.82049e-19	up	0.374091	0.00702122	0.0104139	false	1.75007	3.09919e-33	3.23485e-32	up	-0.916182	3.9268e-10	2.78661e-09	false	-0.479638	0.000293503	0.0011667	false	1A
TraesCS1A02G338500	0.89	0.94	0.8	0.8	0.78	1	2.31	2.81	2.66	3.62	4.52	3.53	65	65	56	58	53	69	152	198	184	256	322	252	0.322455	0.328124	0.399026	false	0.720105	1.8072e-05	3.5998e-05	false	2.40537	7.72789e-30	4.94384e-29	up	-1.41422	1.43704e-08	4.09697e-08	down	1.67465	2.32992e-14	2.52405e-13	up	2.12657	1.29123e-21	2.88055e-20	up	1A
TraesCS1A02G338700	0	0	0	0	0	0	2.56	2.43	2.98	4.82	4.57	4.89	0	0	0	0	0	0	101	103	124	205	196	210	NA	NA	NA	NA	0.979441	1.66963e-07	3.85105e-07	false	10.3599	5.61549e-18	2.27066e-17	up	-9.06403	1.27261e-13	5.25099e-13	down	9.36987	1.01395e-14	1.13843e-13	up	10.0349	6.50489e-17	9.89069e-16	up	1A
TraesCS1A02G339200	0.42	0.27	0.38	2.04	1.57	2.36	0.35	0.58	0.69	2.16	2.72	1.85	15	9	13	72	52	79	11	20	23	74	94	64	2.8276	2.19711e-10	9.08832e-10	up	2.19004	5.6901e-09	1.43613e-08	up	2.89729	1.94376e-12	5.80515e-12	up	2.06939	6.64497e-07	1.66383e-06	up	NA	NA	NA	NA	0.114111	0.707676	0.807355	false	1A
TraesCS1A02G339300	12	10.24	9.5	0.84	0.78	0.9	6.21	6.15	6.62	0.52	0.63	0.53	1821	1471	1388	127	110	129	849	903	951	77	94	78	-3.30652	2.30083e-96	1.07123e-94	down	-3.35845	5.58212e-131	1.12472e-129	down	-3.98307	8.76769e-156	3.3679e-154	down	-2.73305	2.91168e-76	8.29877e-75	down	-0.634881	5.54342e-10	3.8672e-09	false	-0.633811	0.00961995	0.0269325	false	1A
TraesCS1A02G339600	4.22	3.99	4.33	4.52	4.06	3.85	2.61	3.13	2.59	6.56	6.72	7.3	465	416	460	496	418	402	259	334	270	701	723	788	0.339704	0.0273496	0.044399	false	1.44054	1.38377e-34	8.69726e-34	up	0.969185	5.81228e-17	2.23321e-16	false	0.760213	1.92433e-06	4.63582e-06	false	-0.481977	0.000441008	0.00146571	false	0.672039	1.61053e-07	9.91029e-07	false	1A
TraesCS1A02G339700	0.07	0.12	0.06	1.42	1.48	0.98	0.06	0.07	0	0.12	0.24	0.03	5	8	4	100	98	66	4	5	0	8	17	2	4.32061	3.81439e-18	2.57032e-17	up	NA	NA	NA	NA	NA	NA	NA	NA	5.02021	8.93372e-17	4.50483e-16	up	NA	NA	NA	NA	-3.36293	1.6269e-12	1.6378e-11	down	1A
TraesCS1A02G340100	0.1	0.19	0.14	0.85	0.48	1.04	0.49	0.34	0.38	1.97	2	1.74	14	24	19	115	61	134	60	45	49	261	266	233	2.81444	3.76716e-12	1.77876e-11	up	2.38198	2.26989e-29	1.26131e-28	up	3.9834	5.33103e-47	5.08259e-46	up	1.1603	0.00063203	0.00118484	up	1.59083	6.89163e-05	0.000265028	up	1.21395	8.90974e-07	5.09447e-06	up	1A
TraesCS1A02G340900	1.16	0.57	0.84	1.93	1.5	1.69	1.22	1.13	1.09	1.79	1.7	1.23	97	45	68	161	117	134	92	91	86	145	139	101	1.344	8.85174e-06	2.45166e-05	up	0.598511	0.0100524	0.0150915	false	1.12664	0.000121683	0.000216258	up	0.764734	0.00178898	0.00317082	false	0.518163	0.070641	0.128904	false	-0.174019	0.460886	0.605405	false	1A
TraesCS1A02G341200	3.6	2.92	3.16	37.37	28.5	37.22	2.99	2.23	1.94	44.88	48.66	43.9	194	149	164	2002	1434	1898	145	116	99	2343	2560	2314	3.76596	1.40155e-118	9.17316e-117	up	4.40457	0	0	up	4.07954	7.20037e-288	7.34317e-286	up	4.03718	6.37056e-128	3.94021e-126	up	-0.332523	0.120116	0.200346	false	0.358054	0.00300443	0.00963245	false	1A
TraesCS1A02G341300	0.24	0.26	0.12	10.52	9.91	11.2	0.21	0.35	0.29	14.7	14.93	14.77	19	19	9	813	719	824	15	26	21	1107	1133	1123	6.01675	2.54682e-116	1.60292e-114	up	5.84359	1.93927e-176	5.42487e-175	up	6.40863	1.02189e-159	4.04795e-158	up	5.4009	6.37383e-119	3.49393e-117	up	NA	NA	NA	NA	0.435207	5.59915e-05	0.000252242	false	1A
TraesCS1A02G341500	0.32	0.26	0.38	3.73	4.9	4.09	0.26	0.28	0.27	6.52	6.9	6.26	55	42	62	629	776	656	39	46	43	1071	1141	1037	4.0617	4.79719e-95	2.20738e-93	up	4.74771	2.3174e-193	7.28955e-192	up	4.60029	1.54597e-177	7.05054e-176	up	4.15916	1.56916e-102	6.78334e-101	up	-0.158475	0.629741	0.728018	false	0.579315	8.26746e-07	4.74527e-06	false	1A
TraesCS1A02G341600	0	0	0	0	0	0	2.42	3.1	3.54	1.84	1.76	1.82	0	0	0	0	0	0	72	99	111	59	57	59	NA	NA	NA	NA	-0.602758	0.0265702	0.037557	false	8.55617	6.62155e-12	1.91518e-11	up	-8.84215	7.42876e-13	2.9136e-12	down	9.14823	6.01599e-14	6.26267e-13	up	8.2312	4.68025e-11	4.03394e-10	up	1A
TraesCS1A02G341700	0	0	0	0	0	0	2.75	2.32	2.75	3.02	2.88	2.8	0	0	0	0	0	0	219	199	231	259	249	243	NA	NA	NA	NA	0.291121	0.058804	0.0787292	false	10.6578	4.88144e-19	2.08008e-18	up	-10.0507	6.41696e-17	3.26695e-16	down	10.3563	4.66994e-18	7.02938e-17	up	10.3329	6.10227e-18	1.02681e-16	up	1A
TraesCS1A02G341800	0	0	0	0	0	0	1.65	1.75	1.76	1.57	1.39	1.71	0	0	0	0	0	0	107	122	120	110	98	121	NA	NA	NA	NA	-0.00295491	0.989079	0.990927	false	9.46665	7.13024e-15	2.45764e-14	up	-9.1533	6.23686e-14	2.62115e-13	down	9.45891	4.92965e-15	5.68991e-14	up	9.14155	6.51092e-14	7.51493e-13	up	1A
TraesCS1A02G342500	1.4	1.33	1.6	1.54	1.62	1.72	1.92	1.76	1.83	3.23	3.08	3.06	373	335	410	408	402	433	459	451	460	832	800	797	0.520187	0.00102058	0.00216348	false	0.907013	1.10661e-20	4.79778e-20	false	1.36663	7.26276e-30	4.65018e-29	up	0.00977459	0.943039	0.953558	false	0.449153	0.000447287	0.00148457	false	0.888481	1.08524e-13	1.22342e-12	false	1A
TraesCS1A02G342900	12.38	11.71	10.94	5.07	6.48	5.56	7.32	7.42	8.12	4.22	5.08	4.72	1752	1570	1491	714	857	746	933	1016	1089	579	703	654	-0.68768	1.87298e-08	6.66906e-08	false	-0.567972	2.88417e-09	7.41143e-09	false	-1.06598	1.56906e-24	8.41606e-24	down	-0.240174	0.0393434	0.05669	false	-0.508294	1.78218e-08	1.08217e-07	false	-0.337003	0.00741792	0.0214457	false	1A
TraesCS1A02G343000	3.03	4.58	3.52	0.82	0.94	1.14	2.6	3.16	3.19	1.05	1	0.89	402	575	450	108	117	143	311	405	401	135	130	116	-1.58824	2.33207e-14	1.26996e-13	down	-1.467	2.17839e-19	9.03975e-19	down	-1.65934	1.14872e-19	5.03339e-19	down	-1.44674	4.81699e-14	2.03853e-13	down	-0.203358	0.18591	0.284963	false	-0.0288952	0.899707	0.939567	false	1A
TraesCS1A02G343300	0.95	0.96	0.93	2.55	2.21	2.34	0.79	1.26	1.46	1.22	1.07	1.83	56	54	53	150	122	131	42	72	82	70	62	106	1.67367	6.90037e-10	2.7538e-09	up	0.367078	0.240787	0.286277	false	0.792334	0.011757	0.0169821	false	1.19699	1.98733e-05	4.3762e-05	up	0.415197	0.183279	0.281799	false	-0.838523	0.001416	0.00489338	false	1A
TraesCS1A02G343400	1.84	1.99	2.28	0.05	0	0	1.79	2.14	1.61	0.09	0	0	41	42	49	1	0	0	36	46	34	2	0	0	-6.57467	4.06596e-07	1.29032e-06	down	NA	NA	NA	NA	-5.79698	3.44975e-07	7.44222e-07	down	NA	NA	NA	NA	-0.0333203	0.923895	0.949362	false	NA	NA	NA	NA	1A
TraesCS1A02G343700	18.44	9.85	15.13	6.2	3.36	4.4	18.55	20.74	17.73	5.13	4.72	5.7	1127	570	891	377	192	255	1021	1226	1027	304	282	341	-1.27889	8.8628e-08	2.98644e-07	down	-1.73823	3.24932e-57	3.07359e-56	down	-1.2307	2.08107e-11	5.83567e-11	down	-1.8383	2.91238e-23	2.07641e-22	down	0.497816	0.0722183	0.131316	false	0.0930882	0.657014	0.769552	false	1A
TraesCS1A02G343800	0.73	0.79	0.67	0.29	0.57	0.53	0.43	0.76	0.79	0.25	0.35	0.21	51	52	45	20	37	35	27	51	52	17	24	14	-0.318681	0.44889	0.520152	false	-1.15157	0.0102632	0.0153913	down	-1.18028	0.00675829	0.010047	down	-0.340247	0.439116	0.498562	false	-0.0381079	0.912813	0.941475	false	NA	NA	NA	NA	1A
TraesCS1A02G344000	5.06	4.81	4.92	6.53	7.16	7.56	4.71	4.67	4.75	9.17	9.09	8.99	504	454	472	647	667	714	423	450	448	886	885	877	0.872244	1.50254e-10	6.29507e-10	false	1.08488	7.95081e-31	4.58018e-30	up	1.13665	1.93125e-26	1.10728e-25	up	0.769653	1.14218e-09	3.52682e-09	false	0.0412752	0.72152	0.801054	false	0.306513	0.00578735	0.0171982	false	1A
TraesCS1A02G345300	0	0	0	0	0	0	0.92	1.2	1.84	0.77	0.25	0.11	0	0	0	0	0	0	30	42	63	27	9	4	NA	NA	NA	NA	-1.66277	0.00292595	0.00470132	down	NA	NA	NA	NA	-7.77726	1.79232e-09	5.45692e-09	down	8.0839	1.61226e-10	1.19449e-09	up	NA	NA	NA	NA	1A
TraesCS1A02G346400	0.31	0.54	0.52	0.08	0.22	0.18	0.45	0.49	0.45	0.12	0.17	0.15	50	83	80	13	33	28	65	77	69	19	26	24	-1.16321	0.00801293	0.014509	down	-1.53048	1.20451e-05	2.43334e-05	down	-1.38317	0.000410065	0.000694495	down	-1.36028	0.000702863	0.00131031	down	0.136775	0.635345	0.73267	false	NA	NA	NA	NA	1A
TraesCS1A02G346500	0	0.04	0	0.92	0.44	0.32	0.25	0.16	0.2	3.27	1.82	1.96	0	2	0	49	22	16	12	8	10	169	95	102	NA	NA	NA	NA	3.6895	1.21939e-20	5.27944e-20	up	7.76464	4.13176e-13	1.28681e-12	up	NA	NA	NA	NA	NA	NA	NA	NA	2.00101	1.76861e-07	1.08468e-06	up	1A
TraesCS1A02G346600	36.05	32.22	35.69	11.86	12.19	11.6	45.87	44.43	43.63	8.12	8.72	7.19	2171	1838	2071	711	686	662	2488	2588	2490	474	513	424	-1.1948	1.98587e-24	1.78119e-23	down	-2.3416	6.23035e-183	1.82414e-181	down	-1.85919	1.50642e-68	2.084e-67	down	-1.72793	3.88693e-71	1.00674e-69	down	0.471895	2.82448e-09	1.84888e-08	false	-0.622207	7.90885e-07	4.5495e-06	false	1A
TraesCS1A02G347200	2.02	1.89	1.59	2.89	1.9	1.93	1.18	1.22	1.41	1.67	1.47	1.62	125	111	95	178	110	113	66	73	83	100	89	98	0.645427	0.0169075	0.0287386	false	0.453281	0.0669886	0.0887941	false	0.0430281	0.859717	0.879729	false	1.00423	0.000258265	0.000506974	up	-0.420651	0.0825453	0.146806	false	-0.55832	0.0285011	0.068428	false	1A
TraesCS1A02G347400	1.28	1.35	1.33	0.61	0.52	0.24	1.2	1.29	0.83	0.81	0.49	0.41	90	90	90	43	34	16	76	88	55	55	34	28	-1.17519	0.00224618	0.00449529	down	-0.822338	0.0180094	0.0261046	false	-0.957335	0.00423542	0.00645189	false	-1.09104	0.00659837	0.0108094	down	-0.146302	0.578698	0.684714	false	0.260161	0.573627	0.702669	false	1A
TraesCS1A02G347600	1.69	1.63	1.5	0.25	0.49	0.41	0.45	0.73	0.76	0.04	0.08	0.11	125	114	107	18	34	29	30	52	53	3	6	8	-1.72783	6.88102e-07	2.13534e-06	down	-2.90223	2.52521e-07	5.75151e-07	down	-4.09993	1.13085e-18	4.732e-18	down	-0.580154	0.187042	0.234191	false	-1.20658	1.30367e-05	5.61508e-05	down	NA	NA	NA	NA	1A
TraesCS1A02G348400	1.22	0.77	0.89	0.34	0.36	0.24	0.92	0.78	0.78	0.53	0.69	0.56	166	99	117	46	46	31	113	103	101	70	92	75	-1.26717	0.000107761	0.000262462	down	-0.340442	0.162462	0.200186	false	-0.43844	0.103804	0.130476	false	-1.22002	6.99872e-05	0.000146363	down	-0.108116	0.645868	0.74116	false	0.870564	0.00735717	0.0212905	false	1A
TraesCS1A02G348500	4.55	3.81	4.77	8.76	8.4	7.83	4.9	5.18	4.31	18.35	15.09	17.53	319	253	322	611	550	520	309	351	286	1247	1033	1203	1.27785	1.17637e-15	6.95244e-15	up	1.962	9.61112e-72	1.0883e-70	up	2.20996	5.44508e-68	7.46158e-67	up	0.979118	1.44678e-11	5.18916e-11	false	0.237405	0.115598	0.194039	false	0.974059	3.50855e-16	5.00808e-15	false	1A
TraesCS1A02G349000	1.09	1.58	1.58	3.97	5.11	5.66	1.36	1.32	1.04	5.01	7.05	5.64	41	56	57	148	179	201	46	48	37	182	258	207	2.14386	2.47385e-15	1.43365e-14	up	2.38429	7.40075e-24	3.5515e-23	up	2.31573	2.80361e-21	1.31953e-20	up	2.1615	4.59658e-16	2.21943e-15	up	-0.0795383	0.811647	0.869195	false	0.213783	0.299403	0.444005	false	1A
TraesCS1A02G349200	14.86	10.79	14.22	30.27	24.48	28.63	24.3	24.01	22.93	51.13	51.3	52.23	743	511	685	1506	1144	1356	1094	1161	1086	2479	2506	2557	1.41667	1.87274e-19	1.34385e-18	up	1.25581	1.70797e-84	2.23728e-83	up	2.2082	7.27798e-87	1.30712e-85	up	0.412873	0.000626562	0.0011751	false	0.942275	2.97618e-15	3.50805e-14	false	0.834991	8.51203e-15	1.06652e-13	false	1A
TraesCS1A02G349300	0.07	0.13	0.05	0.25	0.32	0.26	0.02	0.02	0	0.07	0.02	0.03	14	25	10	49	60	49	4	4	0	13	3	6	2.05408	1.02461e-05	2.81801e-05	up	NA	NA	NA	NA	NA	NA	NA	NA	4.44964	4.66031e-11	1.60862e-10	up	NA	NA	NA	NA	-2.92043	3.33626e-08	2.19206e-07	down	1A
TraesCS1A02G349600	0.73	0.7	0.76	0.12	0.15	0.07	0.31	0.28	0.36	0.17	0.16	0.15	165	150	165	26	31	15	63	61	77	38	35	33	-2.37369	4.69136e-13	2.3511e-12	down	-0.841124	0.00924847	0.0139531	false	-1.93125	8.55529e-13	2.61171e-12	down	-1.33414	0.00074947	0.00139155	down	-1.10048	8.38649e-07	4.24441e-06	down	NA	NA	NA	NA	1A
TraesCS1A02G349900	0.46	0.79	0.55	48.66	50.58	51.02	1.97	1.85	1.98	45.6	43.25	45.45	28	45	32	2920	2851	2915	107	108	113	2667	2549	2684	6.73705	3.07443e-301	1.28725e-298	up	4.67149	0	0	up	6.48033	0	0	up	4.87746	0	0	up	1.79693	3.14219e-10	2.25399e-09	up	-0.214735	0.00911535	0.0256599	false	1A
TraesCS1A02G350100	16.57	16.7	17.25	3.72	5.17	5.35	19.21	19.62	19.22	3.92	4.63	4.49	1338	1277	1342	299	390	409	1397	1532	1470	307	365	355	-1.48199	1.50907e-24	1.35932e-23	down	-2.01721	6.01991e-105	9.7271e-104	down	-1.69916	7.06921e-54	7.68849e-53	down	-1.85066	7.82916e-45	1.12923e-43	down	0.30762	0.000136087	0.000497517	false	-0.175995	0.283965	0.426983	false	1A
TraesCS1A02G350400	0.38	0.39	0.28	1.09	0.66	0.8	0.11	0.32	0.28	1.23	0.97	0.68	31	30	22	87	50	61	8	25	21	96	76	54	1.62403	4.02908e-05	0.000103406	up	2.1572	1.23753e-07	2.87713e-07	up	1.69542	3.75205e-06	7.54974e-06	up	2.03471	5.11884e-06	1.1902e-05	up	NA	NA	NA	NA	0.115837	0.723641	0.81982	false	1A
TraesCS1A02G350500	9.64	13.37	11.11	16.73	20.53	18.4	8.15	9.4	8.14	21.9	18.17	20.67	827	1086	918	1428	1646	1495	630	780	662	1822	1523	1736	1.05533	1.94175e-15	1.13296e-14	up	1.37709	1.8315e-50	1.55334e-49	up	1.08982	3.73688e-21	1.75174e-20	up	1.29216	9.84938e-30	9.178e-29	up	-0.298579	0.0141811	0.032653	false	0.0755582	0.473663	0.617148	false	1A
TraesCS1A02G350700	9.13	9.28	7.98	4.67	5.97	3.35	6.16	5.36	4.94	3.41	2.36	2.8	273	263	230	139	167	95	166	155	140	99	69	82	-0.570138	0.012741	0.0222052	false	-0.80327	0.000383514	0.000678295	false	-1.36672	1.2455e-10	3.32083e-10	down	-0.0569771	0.814003	0.844765	false	-0.574676	0.000816024	0.00255849	false	-0.756282	0.00497767	0.0150713	false	1A
TraesCS1A02G350900	4.34	4.98	3.78	19.4	15.6	20.89	4.88	4.71	4.41	11.22	11.47	11.06	81	88	68	360	272	369	82	85	78	203	209	202	2.44856	1.0816e-28	1.15134e-27	up	1.40641	5.8046e-13	1.82829e-12	up	1.62091	2.37548e-14	7.93442e-14	up	2.18238	7.3574e-26	5.86439e-25	up	0.203878	0.420734	0.539365	false	-0.783738	7.37034e-06	3.75956e-05	false	1A
TraesCS1A02G351000	0.08	0.08	0	27.69	28.23	31.04	0.14	0.03	0.14	8.9	9.18	9.03	3	3	0	1060	1015	1131	5	1	5	332	345	340	9.43006	1.16674e-54	2.55964e-53	up	6.61137	6.30997e-46	4.95558e-45	up	7.65273	1.56588e-35	1.16806e-34	up	8.33807	2.62711e-75	7.35992e-74	up	NA	NA	NA	NA	-1.73488	1.67343e-48	1.21745e-46	down	1A
TraesCS1A02G351300	0.32	0.34	0.67	1.41	0.94	1.24	0.42	0.21	0.32	0.82	0.92	0.77	13	13	26	56	35	47	15	8	12	32	36	30	1.77376	0.000254217	0.000587418	up	NA	NA	NA	NA	NA	NA	NA	NA	2.12574	1.75751e-05	3.89343e-05	up	NA	NA	NA	NA	-0.571162	0.139647	0.24949	false	1A
TraesCS1A02G351600	0.19	0.12	0.26	1.18	0.64	1.26	0.47	0.56	0.81	0.96	1.41	1.1	13	8	17	81	41	82	29	37	53	64	95	74	2.79613	3.44974e-09	1.30009e-08	up	1.05443	0.00119044	0.00199897	up	2.86271	5.72719e-12	1.66235e-11	up	0.936471	0.0155158	0.0239694	false	NA	NA	NA	NA	0.112345	0.73254	0.82597	false	1A
TraesCS1A02G352500	11.88	9.99	10.77	1.3	0.86	1.74	48.99	49.27	49.63	9.92	10.96	8.85	663	528	579	72	45	92	2463	2660	2625	537	598	484	-2.7094	9.44326e-33	1.15232e-31	down	-2.17674	3.45641e-161	8.6432e-160	down	0.120113	0.356808	0.404354	false	-5.05916	4.79916e-216	7.7523e-214	down	2.28629	2.73476e-144	1.15055e-141	up	2.87407	2.40229e-42	1.3872e-40	up	1A
TraesCS1A02G352800	1.2	1.7	0.69	3.64	1.96	3.18	1.44	1.11	1.45	4.19	4.46	4.25	49	66	27	148	75	123	53	44	56	166	178	170	1.65692	5.34581e-06	1.51256e-05	up	1.82831	1.8682e-15	6.62502e-15	up	2.10377	8.10599e-14	2.62541e-13	up	1.3283	2.7747e-05	6.02463e-05	up	0.265173	0.462832	0.579924	false	0.493097	0.0458254	0.101504	false	1A
TraesCS1A02G353300	5	5.34	5.11	3.46	3.53	3.5	8.63	9.39	9.37	7.09	6.08	6.04	760	768	747	523	501	503	1180	1380	1348	1045	903	898	-0.208174	0.108346	0.152105	false	-0.37417	1.69637e-05	3.38639e-05	false	0.570814	8.72448e-08	1.95546e-07	false	-1.20381	4.84977e-27	4.06571e-26	down	0.934258	9.59343e-25	2.30917e-23	false	0.821037	5.14272e-12	4.91714e-11	false	1A
TraesCS1A02G353800	23.98	17.77	21.06	12.68	11.8	10.12	21.46	25.81	24.32	8.65	8.88	7.98	1000	702	846	526	460	400	806	1041	961	350	362	326	-0.51073	0.00147105	0.00303537	false	-1.35154	3.97707e-35	2.53113e-34	down	-1.04618	3.88626e-14	1.28175e-13	down	-0.866735	2.18112e-10	7.13495e-10	false	0.295108	0.0153237	0.0349358	false	-0.493129	0.000773018	0.00282628	false	1A
TraesCS1A02G353900	1.32	2.62	2.09	1.14	1.02	1.09	1.67	1.8	1.98	0.44	0.62	0.51	50	94	76	43	36	39	57	66	71	16	23	19	-0.534752	0.153488	0.20688	false	-1.65902	8.6906e-06	1.77375e-05	down	-1.6804	3.92867e-05	7.28536e-05	down	-0.564804	0.0979166	0.130532	false	-0.031945	0.915217	0.943143	false	NA	NA	NA	NA	1A
TraesCS1A02G354500	20.37	17.16	19.66	8.19	7.56	10.81	23.25	26.84	26.89	8.24	8.18	7.62	925	738	860	370	321	465	951	1179	1157	363	363	339	-0.75475	7.10863e-06	1.98705e-05	false	-1.54198	4.27569e-51	3.6633e-50	down	-0.99588	1.61435e-15	5.76842e-15	false	-1.35193	1.53132e-19	9.04481e-19	down	0.535736	4.49547e-07	2.34778e-06	false	-0.197903	0.229512	0.364105	false	1A
TraesCS1A02G354800	2.95	1.83	4.68	3.49	3.62	1.83	2.22	2.33	2.29	5.81	3.2	4.16	34	20	52	40	39	20	23	26	25	65	36	47	NA	NA	NA	NA	1.08314	0.00594904	0.00920628	up	0.729049	0.0875969	0.11149	false	NA	NA	NA	NA	NA	NA	NA	NA	0.506746	0.219103	0.351537	false	1A
TraesCS1A02G355100	6.45	6.79	7.45	2.86	2.48	2.28	3.2	2.61	3.15	2.99	2	2.51	320	319	356	141	115	107	143	125	148	144	97	122	-1.08906	6.82933e-08	2.32191e-07	down	-0.116276	0.593421	0.640039	false	-1.20747	2.62857e-10	6.85593e-10	down	-0.0485296	0.833467	0.861465	false	-1.10219	2.15871e-11	1.74918e-10	down	-0.0761645	0.752383	0.840622	false	1A
TraesCS1A02G355300	4.31	3.29	4.96	1.64	1.34	2.65	1.51	1.96	1.86	2.27	2.26	1.63	127	92	141	48	37	74	40	56	52	65	65	47	-0.806548	0.0163635	0.0278991	false	0.343562	0.279751	0.327832	false	-0.775968	0.00659774	0.0098224	false	0.26223	0.485128	0.54376	false	-1.12941	3.39343e-05	0.000137304	down	0.0742447	0.835182	0.897493	false	1A
TraesCS1A02G355500	4.57	4.46	3.78	15.85	17.82	16.4	2.99	2.82	2.77	21.55	21.22	21.49	491	454	391	1695	1790	1669	289	293	282	2246	2228	2261	2.31546	1.66444e-79	5.91227e-78	up	3.04362	1.47855e-294	8.24121e-293	up	2.58201	7.14968e-156	2.74985e-154	up	2.72596	2.75814e-131	1.79359e-129	up	-0.471736	0.000474173	0.0015642	false	0.308437	0.000365266	0.00142391	false	1A
TraesCS1A02G356700	1.63	1.28	1.47	0.41	0.72	0.55	2.33	2.52	2.49	0.81	0.54	0.52	112	83	97	28	46	36	144	167	162	54	36	35	-1.04179	0.00233638	0.00466344	down	-1.83633	8.45445e-13	2.64434e-12	down	-0.973937	0.00208807	0.00328681	false	-1.95357	5.57437e-12	2.05818e-11	down	0.851503	4.05152e-05	0.000162105	false	0.107512	0.788157	0.865941	false	1A
TraesCS1A02G356900	14.13	12.19	14.53	2.48	2.26	2.8	12.98	13.54	12.77	2.26	1.99	2.09	968	791	959	169	145	182	801	897	829	150	133	140	-2.08511	1.06842e-36	1.46857e-35	down	-2.49667	2.50779e-91	3.5283e-90	down	-2.43581	6.2547e-65	8.19124e-64	down	-2.19698	1.40302e-50	2.32257e-49	down	0.0503458	0.627296	0.725703	false	-0.308174	0.134987	0.24309	false	1A
TraesCS1A02G357200	1.1	1.4	1.69	2.33	1.86	1.65	1.76	2.41	1.96	3.7	2.96	3.62	113	136	167	237	178	160	162	238	190	367	296	363	0.830436	0.000619793	0.00135665	false	0.882965	5.99299e-08	1.42082e-07	false	1.54764	3.12564e-16	1.15811e-15	up	0.115497	0.591937	0.645394	false	0.653325	0.0016257	0.00478816	false	0.759383	4.02721e-05	0.000185494	false	1A
TraesCS1A02G357300	1.28	1.59	1.08	3.05	3.42	3.08	1.28	1.17	1.31	2.45	2.62	2.02	122	143	99	289	304	278	110	108	118	226	244	188	1.62546	1.63958e-15	9.60736e-15	up	1.05116	2.57089e-08	6.23487e-08	up	1.10207	1.49549e-07	3.30568e-07	up	1.52375	2.52139e-16	1.23691e-15	up	0.0401659	0.856295	0.90154	false	-0.4814	0.00468303	0.0142692	false	1A
TraesCS1A02G357400	1.38	0.89	1.23	0.74	1.17	1.05	4.3	3.6	3.78	0.76	0.61	0.83	97	59	83	52	77	70	272	245	252	52	42	57	0.104051	0.749986	0.79509	false	-2.26937	1.56429e-26	8.09704e-26	down	-0.413227	0.198286	0.236631	false	-1.80219	2.42565e-15	1.11747e-14	down	1.84542	1.07721e-19	1.84548e-18	up	-0.477244	0.142759	0.253772	false	1A
TraesCS1A02G357500	3.32	2.46	2.94	1.54	1.76	1.35	5.15	4.89	4.32	5.21	4.4	5.54	357	251	305	165	177	138	499	509	440	544	463	584	-0.560785	0.00614363	0.0113538	false	0.215848	0.0746927	0.0981461	false	1.05007	6.52383e-12	1.88764e-11	up	-1.44554	6.54104e-18	3.53141e-17	down	0.82384	1.02218e-08	6.3603e-08	false	1.65184	4.62056e-24	1.21157e-22	up	1A
TraesCS1A02G357700	0	0	0	3.57	2.56	3.38	0	0	0	3.42	3.27	3.6	0	0	0	119	80	107	0	0	0	111	107	118	9.48436	1.12612e-14	6.26535e-14	up	9.33089	1.3207e-14	4.50687e-14	up	9.49709	5.37991e-15	1.86852e-14	up	9.26664	4.03931e-14	1.71816e-13	up	NA	NA	NA	NA	0.0568087	0.818373	0.886469	false	1A
TraesCS1A02G357900	3.29	4.85	3.53	13.02	17.1	14.67	5.37	5.11	5.69	19.72	19.59	20.78	329	459	340	1294	1597	1388	483	494	539	1910	1912	2033	2.28815	3.7753e-51	7.60678e-50	up	2.03078	5.96177e-146	1.34326e-144	up	2.62174	6.32809e-106	1.44951e-104	up	1.64683	5.7507e-44	8.12469e-43	up	0.57987	5.74412e-05	0.000224014	false	0.374488	0.000275737	0.00110221	false	1A
TraesCS1A02G358000	9.22	9.64	8.55	3.99	3.38	5.08	10.09	9.48	9.27	4.73	4.14	3.89	479	474	428	206	164	250	472	476	456	238	210	198	-0.784398	3.89129e-05	0.000100081	false	-1.03895	1.16088e-14	3.97171e-14	down	-0.847883	1.4939e-08	3.50744e-08	false	-1.027	7.45021e-09	2.16934e-08	down	0.180201	0.125921	0.20819	false	-0.0199503	0.920971	0.952372	false	1A
TraesCS1A02G358400	1.2	0.61	0.77	1.32	1.04	1.85	0.49	0.38	0.22	1	1.04	1.2	52	25	32	57	42	76	19	16	9	42	44	51	1.05941	0.0105578	0.0186933	up	1.71477	0.000114754	0.00021336	up	0.580858	0.143648	0.176051	false	2.14128	3.41702e-06	8.06699e-06	up	NA	NA	NA	NA	-0.434218	0.217311	0.349517	false	1A
TraesCS1A02G358600	9.77	9.68	10.46	140.92	117.03	137.37	20.93	19.9	21.19	106.97	107.97	107.03	551	517	568	7906	6167	7337	1063	1085	1132	5849	5949	5909	4.07851	1.52118e-241	3.75751e-239	up	2.51385	0	0	up	3.68326	0	0	up	2.85784	1.67377e-157	1.46695e-155	up	1.15893	6.21583e-33	2.27965e-31	up	-0.351864	0.00028406	0.00113223	false	1A
TraesCS1A02G358700	0.59	0.89	0.63	43.14	35.03	42.29	0	0.05	0	5.35	4.66	4.55	25	36	26	1829	1395	1707	0	2	0	221	194	190	6.19316	1.11242e-187	1.61756e-185	up	8.3234	1.43763e-15	5.1274e-15	up	3.04487	1.29993e-30	8.50198e-30	up	11.4196	1.28965e-28	1.14718e-27	up	NA	NA	NA	NA	-3.10453	6.48404e-115	2.38905e-112	down	1A
TraesCS1A02G358800	4.13	5.47	4.19	2.18	2.85	2.31	2.44	2.85	3.08	1.77	1.38	1.2	471	591	460	247	304	250	251	314	333	196	154	134	-0.561305	0.00117469	0.00246504	false	-0.806442	5.87524e-06	1.21531e-05	false	-1.40531	3.39027e-15	1.19011e-14	down	-0.0127639	0.940854	0.951697	false	-0.609622	3.27601e-05	0.000132753	false	-0.803127	4.61535e-05	0.00021058	false	1A
TraesCS1A02G359100	0.32	0.07	0.31	3.26	2.9	2.86	0.28	0.26	0.4	5.07	4.82	4.03	20	4	19	204	170	170	16	16	24	309	296	248	4.02984	1.50051e-28	1.58753e-27	up	4.01183	9.87204e-52	8.54526e-51	up	4.5596	1.94865e-48	1.91111e-47	up	3.43134	5.2221e-29	4.72619e-28	up	NA	NA	NA	NA	0.572575	0.00144191	0.00497237	false	1A
TraesCS1A02G359400	6.4	5.84	6.05	4.03	3.86	3.23	10.59	9.37	7.81	10.02	8.05	8.32	257	222	234	161	145	123	383	364	297	390	316	327	-0.366406	0.0765418	0.111755	false	0.0639636	0.664802	0.706954	false	0.78352	8.10521e-07	1.70931e-06	false	-1.13693	3.14617e-09	9.41e-09	down	0.708727	4.48554e-06	2.06163e-05	false	1.19181	5.13604e-11	4.41015e-10	up	1A
TraesCS1A02G360300	3.1	3.05	2.57	1.76	2.14	2.08	1.41	1.28	1.8	0.86	0.95	0.87	674	629	539	381	436	428	277	269	372	181	203	185	-0.196863	0.186507	0.245238	false	-0.607762	0.000251884	0.000453588	false	-1.44646	3.63985e-23	1.85524e-22	down	0.591277	0.00034263	0.000662601	false	-0.848908	3.08111e-09	2.01038e-08	false	-1.20785	1.67399e-14	2.04059e-13	down	1A
TraesCS1A02G360400	2.04	1.26	1.91	9.81	7.32	9.22	3.26	3.85	2.12	5.89	4.64	5.42	125	73	113	598	419	535	180	228	123	350	278	325	2.68971	9.72381e-36	1.30378e-34	up	0.925162	1.75838e-06	3.78058e-06	false	1.86492	2.14159e-19	9.27899e-19	up	1.69842	3.37602e-16	1.6425e-15	up	0.929432	0.00021323	0.000753451	false	-0.781318	1.56442e-06	8.68685e-06	false	1A
TraesCS1A02G361000	37.28	26.81	33.94	90.52	73.94	89.35	25.19	28.73	25.56	38.53	42.55	38.83	2514	1712	2205	6074	4660	5708	1530	1874	1633	2520	2804	2564	1.72494	1.76832e-33	2.21315e-32	up	0.729965	5.99028e-24	2.88415e-23	false	0.543668	9.98989e-07	2.09373e-06	false	1.85998	1.73678e-59	3.5174e-58	up	-0.196496	0.0815098	0.145293	false	-1.13765	6.74855e-27	2.07828e-25	down	1A
TraesCS1A02G361200	0.88	1.67	1.25	0.37	0.69	0.49	0.6	0.68	0.53	0.4	0.18	0.33	59	106	81	25	43	31	36	44	34	26	12	22	-0.95178	0.0137774	0.0238445	false	NA	NA	NA	NA	-1.79092	1.11885e-05	2.17165e-05	down	-0.0541893	0.897174	0.915642	false	-0.95901	0.00312008	0.00858672	false	NA	NA	NA	NA	1A
TraesCS1A02G361600	1.1	0.79	1.61	4.79	3.06	4.02	0.56	1.19	0.9	0.62	0.62	0.77	22	15	31	95	57	76	10	23	17	12	12	15	2.11327	1.95668e-07	6.38449e-07	up	NA	NA	NA	NA	NA	NA	NA	NA	2.3467	1.71805e-08	4.86589e-08	up	NA	NA	NA	NA	-2.62527	2.05859e-10	1.66903e-09	down	1A
TraesCS1A02G362000	2.23	2.44	2.35	2.41	3.35	2.43	1.36	1.35	1.67	2.12	1.76	2.07	268	278	273	289	377	277	148	157	191	247	207	244	0.567471	0.00153621	0.00316131	false	0.575559	0.000875393	0.00149227	false	0.0164398	0.919683	0.931478	false	1.0767	1.40928e-08	4.02044e-08	up	-0.569684	0.000580302	0.0018808	false	-0.510904	0.00366114	0.0114656	false	1A
TraesCS1A02G362100	26.58	23.37	24.89	25.47	21.2	27.19	14.94	14.49	14.24	4.74	5.79	4.9	1363	1135	1230	1300	1016	1321	690	719	692	236	290	246	0.334715	0.0156823	0.0268376	false	-1.36343	1.07288e-30	6.15788e-30	down	-2.02366	1.4587e-60	1.778e-59	down	0.943459	2.58614e-13	1.04653e-12	false	-0.67062	3.44461e-12	3.02871e-11	false	-2.31464	1.22139e-59	1.2456e-57	down	1A
TraesCS1A02G362700	12.19	13.19	13.1	8.36	8.29	7.54	13.63	12.79	14.33	5.44	5.85	7.15	881	903	912	601	560	516	887	894	981	381	413	506	-0.319015	0.0134396	0.023303	false	-1.00655	8.56632e-20	3.60955e-19	down	-0.806303	8.45163e-11	2.27948e-10	false	-0.570104	1.63963e-06	3.97201e-06	false	0.189792	0.0441973	0.0869392	false	-0.445131	0.00161018	0.0054923	false	1A
TraesCS1A02G363100	13.29	11.56	13.93	22.22	20.8	21.4	9.14	10.48	10.49	19.96	20.48	19.59	607	500	613	1010	888	926	376	463	454	884	914	876	1.083	2.38466e-15	1.38332e-14	up	1.13158	5.7581e-30	3.24587e-29	up	0.884257	5.66037e-15	1.96413e-14	false	1.27967	2.38582e-24	1.77976e-23	up	-0.25786	0.0402265	0.0802296	false	-0.15617	0.142993	0.25411	false	1A
TraesCS1A02G363200	3.32	3.66	5.58	5.55	6.29	7.43	1.79	2.26	1.99	3.06	4.4	3.34	132	138	214	220	234	280	64	87	75	118	171	130	0.966576	3.71647e-05	9.58313e-05	false	0.974244	4.63315e-05	8.91732e-05	false	0.0360691	0.883315	0.90026	false	1.85377	6.98214e-17	3.54488e-16	up	-0.948674	0.000144844	0.000527405	false	-0.888169	1.72071e-05	8.34989e-05	false	1A
TraesCS1A02G363400	24.58	16.53	15.13	22.73	23.97	22.73	11.11	11.47	8.49	16.15	12.69	13.33	226	144	134	208	206	198	92	102	74	144	114	120	0.650872	0.00462382	0.00874769	false	0.577262	0.0131714	0.019462	false	-0.163099	0.495948	0.543502	false	1.34046	1.09713e-09	3.39531e-09	up	-0.750705	0.00187893	0.00544899	false	-0.772233	0.000103233	0.000443999	false	1A
TraesCS1A02G363600	2.1	1.12	1.72	4.58	3.39	4.16	2.12	1.66	2.42	4.16	3.85	4.4	109	55	86	236	164	204	99	83	119	209	195	223	1.6441	1.31848e-09	5.14731e-09	up	1.13921	9.52674e-09	2.37214e-08	up	1.57642	4.1624e-11	1.14469e-10	up	1.15555	8.55491e-07	2.12151e-06	up	0.427848	0.120454	0.200802	false	-0.0239266	0.901016	0.940404	false	1A
TraesCS1A02G363800	5.19	5.46	5.72	34.77	37.92	33.17	7.37	5.41	6.84	13.65	13.99	14.38	542	540	575	3610	3698	3279	693	546	676	1381	1427	1469	3.04117	2.41513e-174	3.00801e-172	up	1.2377	3.71014e-36	2.41353e-35	up	1.61473	5.6286e-63	7.15282e-62	up	2.6135	1.4278e-115	7.46944e-114	up	0.366599	0.00336353	0.00918632	false	-1.3848	1.91856e-56	1.81405e-54	down	1A
TraesCS1A02G363900	0.17	0	0	0.69	0.8	1.26	0.04	0.35	0.61	1.13	1.61	1.64	5	0	0	20	22	35	1	10	17	32	46	47	NA	NA	NA	NA	2.25235	8.19092e-05	0.0001542	up	4.89624	3.18228e-09	7.77675e-09	up	NA	NA	NA	NA	NA	NA	NA	NA	0.617115	0.153208	0.267811	false	1A
TraesCS1A02G364000	0	0	0.07	826.27	633.02	811.81	0.07	0	0.37	769.65	751.34	739.43	0	0	3	37093	26691	34695	3	0	16	33673	33124	32666	15.3718	3.33088e-74	1.07867e-72	up	12.4431	7.16109e-31	4.12964e-30	up	15.2643	1.42845e-74	2.16073e-73	up	12.5008	9.47978e-31	9.14216e-30	up	NA	NA	NA	NA	-0.0637079	0.553851	0.68644	false	1A
TraesCS1A02G364100	0	0	0	6.39	3.9	5.77	0	0	0	17.63	15.8	18.82	0	0	0	223	128	192	0	0	0	600	542	647	10.3126	1.96104e-17	1.27395e-16	up	11.7435	3.90282e-23	1.83322e-22	up	11.9097	1.08876e-23	5.6666e-23	up	10.0946	8.13517e-17	4.11172e-16	up	NA	NA	NA	NA	1.64188	1.35226e-19	2.60113e-18	up	1A
TraesCS1A02G364200	23.5	25.52	26.43	8.81	8.83	10.64	20.52	19.93	21.09	6.61	8.52	7.45	1546	1590	1675	577	543	663	1216	1268	1315	422	548	480	-1.06394	3.60336e-16	2.18609e-15	down	-1.30834	1.27372e-40	9.07584e-40	down	-1.48416	1.45063e-40	1.21386e-39	down	-0.939246	4.55818e-15	2.06204e-14	false	-0.186265	0.0267515	0.0565951	false	-0.37742	0.00831948	0.023703	false	1A
TraesCS1A02G364400	0	0	0	1.43	1.02	1.52	0	0	0	0.91	0.9	0.35	0	0	0	58	39	59	0	0	0	36	36	14	8.51345	1.88654e-11	8.45919e-11	up	NA	NA	NA	NA	NA	NA	NA	NA	8.29565	5.47428e-11	1.87848e-10	up	NA	NA	NA	NA	-0.935785	0.0290171	0.0694333	false	1A
TraesCS1A02G364600	8.55	9.92	9.66	3.03	3.57	3.87	9.41	9.21	10.2	4.95	4.01	3.63	474	521	516	167	185	203	470	494	536	266	217	197	-1.078	3.19454e-10	1.30433e-09	down	-1.05869	3.70339e-14	1.23869e-13	down	-0.904556	6.09179e-09	1.46441e-08	false	-1.2826	6.30591e-16	3.01909e-15	down	0.143364	0.220696	0.326583	false	0.215061	0.266652	0.407637	false	1A
TraesCS1A02G364700	1.09	0.54	0.83	5.3	3.73	5.33	0.43	0.1	0.07	3.33	4.28	3.69	34	16	25	165	109	158	12	3	2	101	131	113	2.89864	1.38827e-17	9.09231e-17	up	4.41618	1.31198e-21	5.86513e-21	up	2.45105	9.85802e-14	3.1785e-13	up	4.81139	2.65373e-24	1.97621e-23	up	NA	NA	NA	NA	-0.402981	0.0929781	0.180728	false	1A
TraesCS1A02G364900	0.29	0.27	0.32	0.12	0.13	0.08	0.13	0.22	0.38	0.14	0.13	0.2	50	43	53	21	20	13	20	37	61	23	22	33	-1.07077	0.0204684	0.0341387	down	NA	NA	NA	NA	-0.658057	0.103864	0.130541	false	NA	NA	NA	NA	-0.159903	0.682548	0.770606	false	NA	NA	NA	NA	1A
TraesCS1A02G365100	0.19	0.23	0.21	0.11	0.06	0.05	3.58	3.51	3.91	1.2	1.07	0.96	23	26	24	13	7	6	382	402	439	138	124	111	NA	NA	NA	NA	-1.63075	9.83913e-26	4.98264e-25	down	2.60079	2.0754e-17	8.15795e-17	up	-5.40527	6.87798e-58	1.3441e-56	down	4.22094	4.29047e-79	6.06015e-77	up	3.76703	1.3008e-20	2.70042e-19	up	1A
TraesCS1A02G365400	0.21	0.19	0.15	0.4	0.26	0.51	0.44	0.31	0.36	0.78	0.38	0.7	13	11	9	25	15	30	25	19	21	47	23	43	NA	NA	NA	NA	0.87595	0.0489731	0.0664397	false	2.02531	0.000115977	0.000206527	up	NA	NA	NA	NA	NA	NA	NA	NA	0.610779	0.196295	0.323392	false	1A
TraesCS1A02G365700	1.43	1.09	1.47	2.18	2.61	2.83	1.78	1.67	1.71	2.36	2.29	3.37	85	61	84	129	145	159	95	96	96	136	133	196	1.28131	9.65038e-07	2.95268e-06	up	0.776083	0.000494031	0.000864199	false	1.26253	6.65921e-07	1.41067e-06	up	0.744177	0.00136956	0.00246112	false	0.476246	0.0556461	0.105666	false	0.022782	0.919506	0.951607	false	1A
TraesCS1A02G365800	2.27	2.38	2.23	3.25	2.64	3.62	2.32	2.41	2.27	3.85	3.92	4.1	189	188	179	270	206	286	174	194	179	311	319	335	0.824595	5.00073e-05	0.000126819	false	0.900574	7.7068e-10	2.04828e-09	false	1.04261	3.62482e-11	1.0011e-10	up	0.631086	0.00115525	0.00209352	false	0.131408	0.438151	0.556391	false	0.261721	0.124894	0.228283	false	1A
TraesCS1A02G366500	5.46	4.19	5.89	10.22	9.01	10.43	2.72	3.85	3.82	3.67	3.18	3.18	417	303	433	776	643	754	187	284	276	272	237	238	1.28311	1.11223e-14	6.18983e-14	up	0.0865931	0.607955	0.653823	false	-0.377859	0.0261469	0.0360409	false	1.69664	9.16324e-26	7.27894e-25	up	-0.474678	0.00653141	0.0165377	false	-1.61827	2.38605e-30	8.52204e-29	down	1A
TraesCS1A02G366900	0.04	0.03	0.05	6.74	5.02	5.39	0.01	0	0.01	4.74	4.84	4.13	3	2	4	509	356	387	1	0	1	349	359	307	7.48768	1.5289e-46	2.74682e-45	up	9.06894	1.78006e-18	7.14853e-18	up	7.06501	5.31596e-43	4.69476e-42	up	9.44023	1.02293e-19	6.1115e-19	up	NA	NA	NA	NA	-0.379001	0.0203986	0.0515288	false	1A
TraesCS1A02G367000	0	0.06	0	3.31	2.56	3.3	0	0.08	0	3.5	4.69	3.76	0	4	0	219	159	208	0	5	0	226	305	245	7.56355	7.86531e-23	6.57514e-22	up	7.36067	1.56794e-27	8.32327e-27	up	7.84637	1.99021e-25	1.10176e-24	up	7.02695	6.05384e-24	4.4418e-23	up	NA	NA	NA	NA	0.326997	0.0935277	0.18158	false	1A
TraesCS1A02G367200	0.07	0	0.06	2.28	1.37	0.71	0	0.09	0.09	0.94	0.73	0.9	5	0	4	165	93	49	0	6	6	66	52	64	5.45683	4.01777e-17	2.57036e-16	up	4.012	2.34646e-12	7.18171e-12	up	4.58742	3.13939e-13	9.84592e-13	up	4.83142	9.62426e-16	4.56108e-15	up	NA	NA	NA	NA	-0.825809	0.0227994	0.056602	false	1A
TraesCS1A02G367900	6.22	2.38	6.3	4.08	3.33	1.38	5.57	5.03	4.76	3.41	1.64	1.69	124	45	121	81	62	26	100	97	90	66	32	33	-0.415606	0.333122	0.404213	false	-1.04991	0.000995826	0.00168681	down	-0.893847	0.0267193	0.0367899	false	-0.620777	0.080703	0.109353	false	0.145393	0.637123	0.734087	false	-0.437401	0.314882	0.46051	false	1A
TraesCS1A02G368000	3.51	1.69	4.06	19.2	10.84	14.29	3.56	3.47	2.96	5.43	5.59	5.99	70	32	78	381	202	270	64	67	56	105	109	117	2.61424	5.49159e-18	3.66785e-17	up	0.904091	0.000254654	0.00045841	false	1.12689	0.000307049	0.00052558	up	2.33981	3.95628e-20	2.41549e-19	up	0.213064	0.524852	0.63682	false	-1.44265	3.14492e-10	2.498e-09	down	1A
TraesCS1A02G368700	0.76	0.69	1.09	0.44	0.36	0.18	1.01	1.43	0.8	0.77	0.36	0.51	50	43	69	29	22	11	60	91	50	49	23	33	-1.02452	0.0308257	0.0494491	down	-0.851724	0.0218727	0.0312984	false	-0.378059	0.348385	0.395869	false	-1.54814	0.000415588	0.000796012	down	0.462725	0.153566	0.244269	false	NA	NA	NA	NA	1A
TraesCS1A02G369600	17.26	16.23	17.67	98.29	95.23	100.43	16.63	15.13	14.67	31.86	30.23	32.97	2059	1834	2031	11666	10617	11349	1786	1745	1658	3686	3524	3851	2.87314	1.42887e-180	1.87873e-178	up	1.17188	1.18458e-74	1.39126e-73	up	1.14829	1.27307e-48	1.25237e-47	up	2.84564	1.10482e-219	1.88493e-217	up	-0.0340661	0.683672	0.771525	false	-1.68239	2.22652e-96	5.62639e-94	down	1A
TraesCS1A02G369800	140.52	107.18	138.58	77.35	81.73	89.27	105.8	106.91	109.4	51	49.79	51.09	11350	8199	10784	6217	6170	6831	7696	8352	8373	3995	3930	4041	-0.289218	0.0202304	0.0337894	false	-0.947249	9.21553e-98	1.38791e-96	false	-1.09343	4.98403e-29	3.10878e-28	down	-0.193699	0.0235991	0.0353405	false	-0.156388	0.0967907	0.167725	false	-0.762137	1.02831e-19	2.00091e-18	false	1A
TraesCS1A02G371600	30.53	27.37	31.45	5.88	6.95	5.27	26.36	26.52	25.92	5.07	4.19	4.4	2594	2202	2574	497	552	424	2017	2179	2087	418	348	366	-1.95771	2.93131e-52	6.05927e-51	down	-2.39072	1.4339e-169	3.82629e-168	down	-2.45465	4.70127e-115	1.18523e-113	down	-1.94386	1.21115e-66	2.86009e-65	down	-0.074554	0.360672	0.479258	false	-0.45602	0.00194038	0.00649643	false	1A
TraesCS1A02G371700	0.28	0.49	0.43	0.48	0.41	0.23	0.29	0.33	0.7	0.39	1.22	0.78	17	28	25	29	23	13	16	19	40	23	72	46	NA	NA	NA	NA	0.996463	0.0365369	0.0505594	false	1.25256	0.00828621	0.0121915	up	NA	NA	NA	NA	NA	NA	NA	NA	1.04247	0.0340823	0.0794238	false	1A
TraesCS1A02G371900	1.48	1	0.66	1.8	1.52	1.77	1.7	1.96	1.41	1.9	2.46	1.91	124	79	53	150	119	140	128	158	112	154	201	156	1.0499	0.000517749	0.0011456	up	0.442435	0.0313334	0.0438081	false	1.24933	5.25875e-06	1.04721e-05	up	0.190863	0.41354	0.473141	false	0.796842	0.00368713	0.0099717	false	0.243552	0.256387	0.395699	false	1A
TraesCS1A02G372300	1.96	1.59	1.25	3.35	2.09	2.91	2.84	2.41	2.05	4.45	4.23	5.6	127	98	78	216	127	179	166	151	126	280	268	356	1.15739	2.04317e-05	5.43213e-05	up	1.10688	5.07735e-10	1.36175e-09	up	1.82609	1.74455e-18	7.23537e-18	up	0.385236	0.109684	0.144726	false	0.709239	0.0020908	0.00599612	false	0.713787	0.000590552	0.00221012	false	1A
TraesCS1A02G372400	8.62	10.29	8.13	40.23	47.45	42.33	10.36	9.64	11.78	26.52	27.42	27.79	866	979	787	4022	4455	4028	937	937	1121	2584	2692	2734	2.61446	4.70132e-118	3.04997e-116	up	1.50088	1.6047e-90	2.23869e-89	up	1.85259	1.67568e-87	3.03909e-86	up	2.21219	1.46682e-108	6.95475e-107	up	0.341017	0.00207462	0.00595638	false	-0.7203	1.25625e-17	2.04342e-16	false	1A
TraesCS1A02G372800	0.28	0.28	0.44	0.18	0.03	0.12	0.42	0.43	0.36	0.17	0.08	0.11	38	36	58	25	4	16	52	57	47	22	11	15	NA	NA	NA	NA	-1.6186	0.000131978	0.000244067	down	NA	NA	NA	NA	-1.64064	0.00168073	0.00298898	down	0.394745	0.241307	0.350333	false	NA	NA	NA	NA	1A
TraesCS1A02G372900	0.92	0.9	1.3	5.58	6.03	5.18	5.47	5.48	6.51	5.83	6.47	6.21	52	48	71	314	319	278	279	300	349	320	358	344	2.77806	2.66189e-34	3.41699e-33	up	0.221596	0.101351	0.129918	false	2.82541	3.05611e-43	2.71039e-42	up	0.124111	0.437786	0.497234	false	2.59338	3.31628e-37	1.43836e-35	up	0.0887745	0.551522	0.684512	false	1A
TraesCS1A02G373200	1.51	1.17	1.51	5.47	4.81	3.14	2.01	1.84	2.38	4.13	3.68	3.88	88	65	85	318	263	174	106	104	132	234	210	222	2.02992	2.30365e-15	1.33738e-14	up	1.04354	1.61095e-08	3.95071e-08	up	1.73281	2.74436e-16	1.02001e-15	up	1.29023	4.12683e-08	1.13417e-07	up	0.679046	0.00476926	0.0125344	false	-0.255169	0.216167	0.348006	false	1A
TraesCS1A02G374200	0.86	1.71	1.6	31.33	22.67	34.54	4.55	5.2	3.75	22.74	21.83	21.93	24	45	43	868	590	911	114	140	99	614	594	598	4.77104	2.14645e-87	8.66745e-86	up	2.4369	2.80541e-64	2.89873e-63	up	4.25685	3.34168e-100	7.15131e-99	up	2.9001	2.32133e-51	3.91206e-50	up	1.80704	1.05679e-09	7.18431e-09	up	-0.470582	0.00213377	0.00708321	false	1A
TraesCS1A02G374300	0	0	0	5.68	3.66	5.88	0	0	0	70.59	91.8	84.13	0	0	0	71	43	70	0	0	0	860	1127	1035	8.75209	3.53792e-12	1.67265e-11	up	12.4995	4.66925e-26	2.38583e-25	up	12.6655	1.19244e-26	6.88808e-26	up	8.53412	1.07796e-11	3.90155e-11	up	NA	NA	NA	NA	3.95903	2.15089e-103	6.39778e-101	up	1A
TraesCS1A02G374400	0	0	0	2.66	3.84	2.8	0	0	0	10.21	12.53	14.65	0	0	0	34	46	34	0	0	0	127	157	184	NA	NA	NA	NA	9.80804	3.98734e-16	1.45651e-15	up	9.97405	1.50209e-16	5.65676e-16	up	NA	NA	NA	NA	NA	NA	NA	NA	1.95927	3.05927e-12	2.99374e-11	up	1A
TraesCS1A02G374500	0	0	0	19.48	13.4	16.47	0	0	0	0	0	0	0	0	0	246	159	198	0	0	0	0	0	0	10.4624	4.7474e-18	3.18558e-17	up	NA	NA	NA	NA	NA	NA	NA	NA	10.2446	2.04179e-17	1.07249e-16	up	NA	NA	NA	NA	-10.171	3.1449e-17	4.92609e-16	down	1A
TraesCS1A02G374700	0	0	0	0.27	0.15	0.25	0	0	0.02	0.6	0.65	0.66	0	0	0	23	12	21	0	0	2	51	55	56	NA	NA	NA	NA	6.4225	4.77259e-09	1.21086e-08	up	8.44446	1.51096e-11	4.27497e-11	up	NA	NA	NA	NA	NA	NA	NA	NA	1.45397	0.000540081	0.00203914	up	1A
TraesCS1A02G374800	1.11	1.27	1.26	0.88	1.7	1.52	1.63	1.94	1.75	3.19	3.27	2.97	195	212	213	154	280	254	258	331	292	544	563	511	0.515609	0.0252733	0.0413236	false	0.960475	5.7313e-15	1.99007e-14	false	1.63066	1.90087e-31	1.27515e-30	up	-0.203937	0.337822	0.396137	false	0.659234	2.29997e-05	9.54403e-05	false	1.15463	9.20903e-10	6.95304e-09	up	1A
TraesCS1A02G374900	0.31	0.28	0.33	0.14	0.09	0.08	0.35	0.3	0.37	0.15	0.26	0.21	51	43	52	23	14	12	52	47	58	24	41	34	-1.209	0.0117598	0.0206419	down	-0.5854	0.105161	0.13436	false	-0.313983	0.418404	0.466699	false	-1.53173	0.000668403	0.00124956	down	0.261271	0.405786	0.524969	false	NA	NA	NA	NA	1A
TraesCS1A02G375000	0.86	0.51	0.6	3.98	2.11	3.65	1.48	2.22	2.15	4.86	6.03	4.64	39	22	26	179	89	156	60	97	92	213	266	205	2.65909	3.98354e-14	2.13482e-13	up	1.54389	3.69532e-13	1.17647e-12	up	3.22435	1.29355e-33	9.20485e-33	up	0.926528	0.00177257	0.00314318	false	1.67033	6.0391e-07	3.10739e-06	up	0.611968	0.0111324	0.030616	false	1A
TraesCS1A02G375200	16.83	12.89	16.85	21.23	14.97	16.42	9.81	8.57	10.67	8.05	9.29	7.78	1394	1011	1345	1750	1159	1289	732	687	838	647	752	631	0.531521	0.00119716	0.00250791	false	-0.0718523	0.503885	0.553969	false	-0.637067	5.39454e-07	1.14924e-06	false	1.04544	1.50379e-12	5.77269e-12	up	-0.575244	2.31962e-06	1.10941e-05	false	-1.12448	4.82967e-15	6.18435e-14	down	1A
TraesCS1A02G375600	3.28	2.88	3.01	7.92	9.07	6.78	1.8	1.85	1.41	4.73	4.33	4.62	292	243	258	702	755	572	144	159	119	408	377	403	1.72095	5.65319e-28	5.85307e-27	up	1.57405	3.22707e-24	1.56512e-23	up	0.831441	9.33907e-09	2.21962e-08	false	2.41293	1.73983e-47	2.67254e-46	up	-0.753064	2.14675e-05	8.96126e-05	false	-0.848443	4.82975e-10	3.76042e-09	false	1A
TraesCS1A02G375700	2.59	2.86	3.49	3.32	2.9	4.79	5.37	5.73	5.78	6.02	5.13	4.88	44	46	57	56	46	77	82	94	93	99	85	81	0.653892	0.0738307	0.108258	false	0.0614035	0.799933	0.828912	false	1.09688	0.000224662	0.000389962	up	-0.43263	0.157446	0.20068	false	1.02473	0.000187681	0.00066956	up	0.486276	0.106867	0.20167	false	1A
TraesCS1A02G375800	78.13	77.26	93.01	21.27	22.58	26.8	57.21	51.92	54.39	31.49	32.61	31.9	3717	3481	4263	1007	1004	1208	2451	2389	2452	1453	1516	1486	-1.46408	2.84463e-30	3.18422e-29	down	-0.630516	1.04726e-22	4.85567e-22	false	-1.11676	8.37164e-35	6.12546e-34	down	-1.02875	1.0912e-20	6.85879e-20	down	-0.496726	1.17463e-08	7.259e-08	false	0.389626	0.000399083	0.00154415	false	1A
TraesCS1A02G376100	6.67	6.44	7	9.29	9.24	11.36	7.37	6.83	7.63	11.61	12.15	10.95	651	595	658	902	843	1050	648	645	706	1099	1159	1047	0.922968	3.14537e-11	1.38678e-10	false	0.806723	4.88557e-20	2.07606e-19	false	1.04309	2.6308e-24	1.39963e-23	up	0.63559	6.36834e-07	1.59674e-06	false	0.225918	0.0322234	0.0663559	false	0.162909	0.167683	0.286633	false	1A
TraesCS1A02G376500	0.01	0.02	0.02	0.21	0.25	0.17	4.09	4.09	3.93	9.37	9.52	9.04	1	2	2	23	25	17	400	430	404	987	1011	962	NA	NA	NA	NA	1.34376	2.66655e-46	2.10947e-45	up	9.45679	3.52451e-47	3.37506e-46	up	-4.09754	2.07079e-60	4.28385e-59	down	8.10239	2.21689e-34	8.60175e-33	up	5.43196	7.63355e-137	3.72608e-134	up	1A
TraesCS1A02G378600	1.9	1.86	1.87	0.89	0.44	0.81	3.32	3.35	2.84	1.31	1.17	0.61	138	128	131	64	30	56	217	235	195	92	83	43	-1.03311	0.00124549	0.00260149	down	-1.48708	1.01072e-09	2.66911e-09	down	-0.61528	0.0319313	0.043467	false	-1.9569	9.06028e-13	3.53002e-12	down	0.860677	1.4697e-06	7.21499e-06	false	0.463113	0.22044	0.353187	false	1A
TraesCS1A02G379000	31.44	30.95	28.4	58.97	56.79	57.64	23.7	23.01	22.66	53.12	55.74	55.93	2884	2689	2510	5383	4869	5009	1958	2042	1970	4726	4997	5024	1.2851	4.97049e-37	6.89307e-36	up	1.38557	2.20762e-146	4.98532e-145	up	1.11528	1.64886e-52	1.74772e-51	up	1.50419	2.71212e-66	6.34783e-65	up	-0.280764	0.000206864	0.000732183	false	-0.127111	0.114135	0.212647	false	1A
TraesCS1A02G379200	0	0	0	0	0	0	1.68	1.66	2.29	1.69	1.18	1.14	0	0	0	0	0	0	46	49	66	50	35	34	NA	NA	NA	NA	-0.351754	0.311807	0.361357	false	NA	NA	NA	NA	-8.03589	2.32735e-10	7.5953e-10	down	8.34201	2.01114e-11	1.63514e-10	up	NA	NA	NA	NA	1A
TraesCS1A02G379600	1.41	1.46	1.59	0.25	0.17	0.15	0.89	1.24	1.3	0.15	0.12	0.2	107	105	116	19	12	11	61	91	93	11	9	15	-2.59938	4.42929e-11	1.93322e-10	down	-2.72138	1.51336e-11	4.42826e-11	down	-2.98195	1.07194e-14	3.6542e-14	down	-2.3897	9.2614e-09	2.67709e-08	down	-0.270197	0.267112	0.379664	false	NA	NA	NA	NA	1A
TraesCS1A02G379700	0.84	0.63	0.9	0.13	0.03	0	0.11	0.18	0.2	0.05	0.08	0	52	37	54	8	2	0	6	11	12	3	5	0	-3.4736	1.97132e-06	5.8429e-06	down	NA	NA	NA	NA	-3.91091	3.54956e-08	8.15145e-08	down	NA	NA	NA	NA	-2.14998	6.56454e-06	2.95266e-05	down	NA	NA	NA	NA	1A
TraesCS1A02G379900	8.15	8.47	5.93	2.48	3.64	2.92	5.77	5.23	5.39	2.6	2.63	2.33	472	465	331	143	197	160	301	293	296	146	149	132	-0.97534	1.33826e-06	4.04099e-06	false	-0.978969	1.03792e-09	2.73937e-09	false	-1.3212	2.68516e-13	8.45838e-13	down	-0.683612	0.00022645	0.000447383	false	-0.352961	0.0198913	0.0438225	false	-0.305035	0.148263	0.261111	false	1A
TraesCS1A02G380900	0	0	0.13	8.1	8.3	7.77	0.16	0.15	0.28	7.16	7.39	8.11	0	0	11	722	695	660	13	13	24	622	647	712	7.91018	6.80623e-06	1.90758e-05	up	5.38987	2.38065e-112	4.13821e-111	up	7.72459	1.10423e-05	2.14436e-05	up	5.52734	1.90489e-107	8.87932e-106	up	NA	NA	NA	NA	-0.145935	0.207912	0.337872	false	1A
TraesCS1A02G381400	0	0	0	13.2	12.34	18.08	0	0.09	0.19	10.43	15.71	11.42	0	0	0	148	130	193	0	1	2	114	173	126	10.108	8.3101e-17	5.22967e-16	up	7.18745	2.5314e-16	9.32564e-16	up	9.79439	6.77927e-16	2.47259e-15	up	7.44958	2.64357e-17	1.37869e-16	up	NA	NA	NA	NA	-0.269578	0.261004	0.401168	false	1A
TraesCS1A02G381500	2.08	2.37	1.95	10.87	9.53	8.98	2.8	2.85	3.16	11.34	11.85	13.03	186	201	168	969	798	762	226	247	268	985	1037	1143	2.55478	1.85085e-58	4.39706e-57	up	2.17645	1.7588e-91	2.48214e-90	up	2.75848	5.5258e-106	1.26812e-104	up	1.92175	3.28372e-41	4.30484e-40	up	0.571267	0.000473402	0.00156192	false	0.24661	0.0385008	0.0879056	false	1A
TraesCS1A02G381800	3.2	4.26	3.64	0.93	1.19	1.03	3.38	3.57	3.35	0.9	1.14	1.09	219	276	240	63	76	67	208	236	217	60	76	73	-1.47018	5.65597e-10	2.27008e-09	down	-1.57946	7.43122e-15	2.56465e-14	down	-1.56881	1.05282e-12	3.19731e-12	down	-1.53154	6.43689e-12	2.36514e-11	down	5.04205e-05	0.999753	0.999872	false	-0.0572165	0.843828	0.903011	false	1A
TraesCS1A02G381900	0.03	0.03	0	0	0	0	0.77	1	0.63	0.42	0.66	0.63	2	2	0	0	0	0	43	60	37	25	40	38	NA	NA	NA	NA	-0.360667	0.339656	0.390348	false	NA	NA	NA	NA	-7.83515	1.00836e-09	3.12953e-09	down	5.28381	2.87371e-10	2.06795e-09	up	NA	NA	NA	NA	1A
TraesCS1A02G382200	0.51	0.25	0.38	2.33	1.16	1.52	0.74	0.68	0.78	0.77	1.06	0.75	32	15	23	145	68	90	42	41	46	47	65	46	2.48561	4.81044e-10	1.93955e-09	up	0.373699	0.262349	0.30947	false	1.42486	0.000640453	0.0010644	up	1.38252	4.655e-05	9.90578e-05	up	1.04143	0.0100602	0.0241865	up	-1.01505	0.00203193	0.00677587	down	1A
TraesCS1A02G383200	38.21	33.81	42.72	10.39	6.07	10	58.59	55.98	54.8	5.41	7.89	5.61	1501	1258	1617	406	223	372	2073	2127	2040	206	303	216	-1.75752	2.34244e-20	1.75381e-19	down	-3.02487	4.56609e-170	1.22227e-168	down	-2.34662	4.95198e-59	5.88401e-58	down	-2.48784	5.7093e-52	9.75157e-51	down	0.667982	1.94357e-12	1.75523e-11	false	-0.543756	0.0135392	0.0362897	false	1A
TraesCS1A02G383500	6.15	5.06	6.81	8.23	6.22	8.56	3.94	4.02	2.87	3.03	2.7	2.89	163	127	174	217	154	215	94	103	72	78	70	75	0.706486	0.0023829	0.00474859	false	-0.190267	0.465437	0.516498	false	-0.809407	0.00086449	0.0014169	false	1.27428	1.56929e-07	4.13222e-07	up	-0.629845	0.00587024	0.015067	false	-1.47235	2.88306e-10	2.30025e-09	down	1A
TraesCS1A02G383800	1.22	1.58	1.94	0.11	0	0.29	0	0.06	0.11	0	0	0	45	55	69	4	0	10	0	2	4	0	0	0	-3.21941	1.22166e-06	3.69988e-06	down	NA	NA	NA	NA	-8.01418	2.38056e-10	6.23122e-10	down	NA	NA	NA	NA	-4.66788	8.33857e-11	6.33731e-10	down	NA	NA	NA	NA	1A
TraesCS1A02G384000	0.78	0.76	0.66	15.56	15.83	14.98	1.96	2.01	1.39	49.89	50.9	48.66	48	44	39	949	907	870	108	119	81	2966	3049	2921	4.74641	7.84954e-144	6.979e-142	up	4.93976	0	0	up	6.3396	0	0	up	3.29476	1.37638e-95	5.31115e-94	up	1.39063	7.10814e-07	3.62327e-06	up	1.63562	3.16514e-74	4.96596e-72	up	1A
TraesCS1A02G384200	1.32	0.73	1.01	0.72	0.32	0.27	1.78	1.54	1.3	1.43	1.86	1.04	61	32	45	33	14	12	74	69	57	64	84	47	-0.856598	0.0990948	0.140651	false	0.0427795	0.888765	0.905853	false	0.749854	0.0382854	0.0515416	false	-1.61606	0.000252892	0.000497021	down	0.696802	0.0304772	0.0632793	false	1.65199	0.000212976	0.000868479	up	1A
TraesCS1A02G384300	0.14	0.26	0.08	1.05	0.81	1.06	0.05	0.04	0.09	0.18	0.12	0.14	15	26	8	111	80	106	5	4	9	18	12	15	2.96934	4.30549e-13	2.16451e-12	up	NA	NA	NA	NA	NA	NA	NA	NA	4.19733	6.87476e-19	3.91443e-18	up	NA	NA	NA	NA	-2.80051	4.00746e-14	4.71111e-13	down	1A
TraesCS1A02G384600	11.05	12.67	13.19	14.68	18.3	9.78	6.33	4.54	4.39	8.21	3.16	8.25	93	101	107	123	144	78	48	37	35	67	26	68	0.557958	0.0472204	0.0725813	false	0.500585	0.204253	0.246757	false	-0.656137	0.0541252	0.0712633	false	1.66538	2.49557e-07	6.4634e-07	up	-1.16896	4.37886e-05	0.000174338	down	-1.17456	0.000745258	0.00273498	down	1A
TraesCS1A02G385500	1.16	1.59	1.63	0.51	0.7	0.24	2.46	1.81	2.08	1.06	1.12	0.8	71	92	96	31	40	14	135	107	120	63	67	48	-1.24953	0.00202456	0.00408246	down	-0.945604	0.000247613	0.000446232	false	-0.29535	0.32428	0.371321	false	-1.94896	3.54326e-08	9.78792e-08	down	0.639321	0.00727506	0.0181676	false	0.993716	0.0160791	0.0420708	false	1A
TraesCS1A02G385900	60.06	51.56	62.88	29.11	22.56	23.84	17.35	14.42	13.53	0	0	0	1968	1600	1985	949	691	740	512	457	420	0	0	0	-0.854481	4.4347e-09	1.65782e-08	false	-11.2194	3.74014e-21	1.64926e-20	down	-13.049	2.88225e-28	1.755e-27	down	0.92408	1.23556e-09	3.8051e-09	false	-1.8406	1.59229e-58	1.35725e-56	down	-12.1512	1.51291e-24	4.08907e-23	down	1A
TraesCS1A02G386400	0.39	0.27	0.17	0.23	0.26	0.29	0.43	0.67	0.46	0.95	0.8	1.04	24	16	10	14	15	17	24	40	27	57	48	63	NA	NA	NA	NA	0.96941	0.00709957	0.0108803	false	1.9994	3.88079e-06	7.79924e-06	up	NA	NA	NA	NA	NA	NA	NA	NA	1.7898	2.30245e-05	0.00010987	up	1A
TraesCS1A02G386700	0.03	0.17	0	1	0.88	1.74	0.03	0.28	0.12	1.25	0.76	1.6	1	6	0	36	30	60	1	10	4	44	27	57	NA	NA	NA	NA	3.18398	2.67856e-07	6.09102e-07	up	4.43748	5.29529e-09	1.27753e-08	up	NA	NA	NA	NA	NA	NA	NA	NA	-0.0603547	0.885113	0.930974	false	1A
TraesCS1A02G387400	0.07	0.06	0	36.9	33.32	34.7	0.11	0.07	0.11	26.94	31.01	28.66	5	4	0	2711	2299	2427	7	5	8	1929	2237	2072	10.0586	3.64194e-91	1.57053e-89	up	8.36617	2.15178e-139	4.60964e-138	up	9.68418	1.23837e-86	2.21495e-85	up	8.68913	4.76886e-143	3.55394e-141	up	NA	NA	NA	NA	-0.331144	0.000786852	0.0028734	false	1A
TraesCS1A02G387700	3.64	4.06	3.84	7.53	8.22	9.29	2.97	2.75	2.7	7.6	6.77	7.35	659	697	671	1358	1393	1595	485	482	463	1336	1200	1304	1.46839	1.28654e-31	1.50878e-30	up	1.50574	3.96524e-62	3.99471e-61	up	1.1688	3.91143e-32	2.67637e-31	up	1.75433	1.43391e-48	2.26328e-47	up	-0.347664	0.00152313	0.00451338	false	-0.257509	0.0167439	0.043521	false	1A
TraesCS1A02G388400	6.77	8.12	7.04	1.9	1.96	1.84	7.76	7.38	8.3	2.58	2.07	2.46	1140	1295	1142	319	308	294	1177	1202	1324	421	341	406	-1.59134	9.11414e-32	1.07398e-30	down	-1.58295	1.29996e-55	1.19997e-54	down	-1.36783	5.30455e-30	3.40893e-29	down	-1.85711	5.99236e-54	1.07489e-52	down	0.20429	0.0304808	0.0632835	false	0.265425	0.0766744	0.15461	false	1A
TraesCS1A02G388700	0.46	0.6	0.76	0.28	0.39	0.79	0.7	0.92	0.46	0.04	0.22	0.23	33	40	52	20	26	53	45	63	31	3	15	16	0.034448	0.942368	0.954904	false	-1.95159	0.000232913	0.000420734	down	NA	NA	NA	NA	-0.332258	0.47336	0.532317	false	0.304503	0.412109	0.531097	false	NA	NA	NA	NA	1A
TraesCS1A02G388800	16.04	18.43	16.77	5.65	4.73	5.39	18.67	19.29	18.13	3.97	3.76	3.79	955	1039	962	335	263	304	1001	1111	1023	229	219	221	-1.34483	6.91277e-20	5.06393e-19	down	-2.14657	1.22602e-91	1.7331e-90	down	-1.89668	6.28547e-54	6.84588e-53	down	-1.64596	2.84265e-35	3.14316e-34	down	0.239116	0.00979084	0.0236238	false	-0.508717	0.00229859	0.00757356	false	1A
TraesCS1A02G389500	8.38	9.92	10.77	13.71	15.44	13.44	10.96	9.58	9.61	22.37	21.05	21.72	689	773	853	1122	1187	1047	812	762	749	1784	1692	1749	0.900006	5.54729e-12	2.5866e-11	false	1.24935	3.27952e-56	3.05562e-55	up	1.42033	1.2641e-43	1.13048e-42	up	0.678409	1.50247e-09	4.59888e-09	false	0.16031	0.15963	0.252267	false	0.561567	4.39406e-09	3.11733e-08	false	1A
TraesCS1A02G389600	2.14	1.54	2.14	1.08	0.84	1.11	2.65	2.99	2.65	1.58	1.61	1.24	106	72	102	53	39	52	118	143	124	76	78	60	-0.589391	0.0745784	0.109205	false	-0.764088	0.00126128	0.00211217	false	-0.138803	0.624971	0.666936	false	-1.2659	6.82277e-06	1.56819e-05	down	0.614854	0.00711824	0.0178221	false	0.49398	0.122618	0.225095	false	1A
TraesCS1A02G390200	4.46	4.85	4.47	2.85	2.4	2.3	6.78	5.84	5.72	4.46	4.07	3.37	266	274	257	169	134	130	364	337	323	258	237	197	-0.513529	0.0114832	0.0201877	false	-0.485424	0.00146254	0.00243071	false	0.0441779	0.795164	0.822451	false	-1.09422	3.7936e-09	1.12798e-08	down	0.518637	0.000254028	0.000885813	false	0.600559	0.00281615	0.00908801	false	1A
TraesCS1A02G390400	31.36	38.54	35.79	9.34	11.71	11.21	25.58	24.35	24.72	7.15	7.17	7.46	2189	2548	2407	649	764	741	1608	1644	1635	484	489	510	-1.36401	1.52769e-28	1.616e-27	down	-1.63957	2.84441e-91	3.99813e-90	down	-2.02225	1.94615e-91	3.72374e-90	down	-1.03195	2.01621e-21	1.31295e-20	down	-0.393488	4.94102e-06	2.25899e-05	false	-0.616919	6.54301e-07	3.79593e-06	false	1A
TraesCS1A02G390500	187.46	193.16	211.15	36.43	28.06	38.37	137.56	141.39	124.4	22.21	22.94	23.39	7834	7645	8501	1515	1096	1519	5177	5715	4926	900	937	957	-2.16836	2.01419e-58	4.78125e-57	down	-2.42003	8.72954e-286	4.63606e-284	down	-2.85489	1.29833e-289	1.34435e-287	down	-1.78507	6.24536e-46	9.25407e-45	down	-0.445528	5.77329e-09	3.68255e-08	false	-0.642657	7.62055e-07	4.38985e-06	false	1A
TraesCS1A02G391700	8.19	11.34	8.17	0.12	0.06	0.13	9.75	8.07	9.78	0.08	0.22	0.32	597	783	574	9	4	9	640	569	676	6	16	23	-6.10569	6.99616e-64	1.86299e-62	down	-5.30926	1.90249e-94	2.76877e-93	down	-5.19521	2.5987e-77	4.09894e-76	down	-6.27153	7.73993e-73	2.07184e-71	down	0.103553	0.441626	0.559713	false	NA	NA	NA	NA	1A
TraesCS1A02G391800	6.85	7.14	6.44	0.08	0.17	0.15	6.04	7.59	7.48	0.26	0.08	0.34	435	429	394	5	10	9	345	466	450	16	5	21	-5.34488	1.55444e-51	3.15461e-50	down	-4.82325	1.81908e-65	1.9097e-64	down	-4.65716	4.57681e-58	5.35153e-57	down	-5.56148	7.85454e-57	1.49878e-55	down	0.155863	0.239762	0.348535	false	NA	NA	NA	NA	1A
TraesCS1A02G392000	333.22	235.52	338.74	424.26	382.03	437	468.25	501.41	500.28	119.46	117.92	119.83	11350	7598	11116	14380	12162	14101	14364	16519	16147	3946	3925	3997	0.804484	1.06157e-08	3.85288e-08	false	-1.90375	0	0	down	-1.0924	2.12561e-22	1.05156e-21	down	-0.0577351	0.533294	0.590123	false	0.801262	2.97782e-06	1.39979e-05	false	-1.8541	4.88701e-99	1.31032e-96	down	1A
TraesCS1A02G393900	12.29	12.77	9.64	4.8	2.93	2.64	10.43	10.49	9.32	2.85	3.54	3.5	373	367	282	145	83	76	285	308	268	84	105	104	-1.38154	3.11556e-08	1.09047e-07	down	-1.4745	1.95106e-16	7.22425e-16	down	-1.55455	1.65341e-15	5.90454e-15	down	-1.35352	1.22633e-08	3.51455e-08	down	-0.0906734	0.54617	0.65585	false	-0.128363	0.653305	0.766677	false	1A
TraesCS1A02G394500	0.22	0.38	0.11	0.45	0.44	0.63	0.44	0.61	0.51	0.89	1.14	0.99	12	20	6	25	23	33	22	33	27	48	62	54	NA	NA	NA	NA	1.08425	0.00281983	0.00453778	up	2.35649	5.5267e-07	1.17674e-06	up	NA	NA	NA	NA	NA	NA	NA	NA	0.938026	0.0145281	0.0385691	false	1A
TraesCS1A02G394900	0	0	0	0.37	0.11	0.11	0	0.03	0	2.53	2.75	2.98	0	0	0	29	8	8	0	2	0	192	210	228	NA	NA	NA	NA	8.38084	8.61716e-16	3.10249e-15	up	10.4036	4.0679e-18	1.65522e-17	up	NA	NA	NA	NA	NA	NA	NA	NA	3.7323	1.88191e-26	5.65365e-25	up	1A
TraesCS1A02G395300	3.41	2.2	3.78	8.17	7.23	8.69	3.93	4.54	3.85	8.23	7.44	7.82	232	142	248	553	460	560	241	299	248	543	495	521	1.70784	3.8206e-17	2.44687e-16	up	1.06709	3.17302e-17	1.21525e-16	up	1.57393	7.91079e-19	3.33569e-18	up	1.15017	2.09419e-13	8.524e-13	up	0.496385	0.0106306	0.0253632	false	-0.0911446	0.495968	0.636868	false	1A
TraesCS1A02G395800	0.15	0.03	0.2	2.02	1.99	1.58	0.27	0.12	0.03	1.57	2	1.95	6	1	8	83	77	62	10	5	1	63	81	79	4.25285	3.89148e-15	2.23046e-14	up	3.87435	3.27758e-14	1.09836e-13	up	4.14096	2.93512e-15	1.03481e-14	up	3.93454	2.0779e-13	8.46106e-13	up	NA	NA	NA	NA	-0.0701615	0.805758	0.878318	false	1A
TraesCS1A02G396200	20.61	18	15.75	40.66	30.95	32.02	22.86	25.19	20.84	38.89	37.21	41.31	1290	1067	950	2533	1811	1899	1289	1525	1236	2361	2276	2532	1.28632	6.17091e-18	4.10948e-17	up	0.905658	3.79754e-31	2.20574e-30	false	1.36533	1.98663e-40	1.65713e-39	up	0.774969	4.70435e-09	1.38824e-08	false	0.449204	5.23244e-05	0.000205683	false	0.122819	0.300979	0.445622	false	1A
TraesCS1A02G396500	2.55	2.97	2.49	0.91	1.2	0.88	2.07	2	2.05	1.12	0.65	0.83	340	375	320	121	149	111	248	258	258	145	84	108	-1.07701	5.83467e-08	1.9958e-07	down	-1.09873	3.85614e-08	9.25325e-08	down	-1.37062	2.41764e-11	6.74682e-11	down	-0.85521	1.31635e-05	2.9487e-05	false	-0.282951	0.0462198	0.0903264	false	-0.253093	0.322926	0.468842	false	1A
TraesCS1A02G396900	5.26	3.44	5.2	15.26	13.6	18.87	9.7	10.06	8.28	13.88	14.65	14.99	189	117	180	546	457	643	314	350	282	484	515	528	2.13137	2.67855e-25	2.48907e-24	up	0.771697	4.26589e-10	1.14887e-09	false	1.89996	7.04802e-29	4.37556e-28	up	0.951574	9.61055e-09	2.77511e-08	false	1.1182	1.21282e-09	8.20244e-09	up	-0.187973	0.200089	0.328054	false	1A
TraesCS1A02G397000	1.57	2	1.9	0.99	0.85	0.97	0.92	1.39	1.31	0.75	0.72	0.77	125	151	146	78	63	73	66	107	99	58	56	60	-0.613049	0.021658	0.0359389	false	-0.557892	0.0451132	0.0615588	false	-1.03235	5.1973e-05	9.53943e-05	down	-0.189544	0.516732	0.574371	false	-0.484683	0.0371208	0.074844	false	-0.376449	0.204024	0.332925	false	1A
TraesCS1A02G397500	6.25	7.84	9.22	6.86	7.06	7.27	31.75	29.23	25.12	31.87	30.16	30.59	197	234	280	215	208	217	901	891	750	974	929	944	0.213162	0.29383	0.362932	false	0.243077	0.0116105	0.0172884	false	2.24701	3.49859e-61	4.31278e-60	up	-1.84141	8.41172e-37	9.72592e-36	down	1.99303	3.42073e-44	1.93732e-42	up	2.07553	1.70407e-60	1.7824e-58	up	1A
TraesCS1A02G398400	0.92	1.25	1.74	0.63	0.78	0.69	1.51	1.72	1.13	1.34	1.39	1.76	48	62	88	33	38	34	71	87	56	68	71	90	-0.552907	0.155561	0.209343	false	0.178413	0.525453	0.574967	false	0.452862	0.152239	0.185657	false	-0.877644	0.01279	0.0200512	false	0.263489	0.392672	0.511849	false	1.04649	0.00150926	0.00518461	up	1A
TraesCS1A02G398500	0.62	0.58	0.33	0.36	0.3	0.17	0.94	0.57	1.29	0.24	0.42	0.52	35	31	18	20	16	9	48	31	69	13	23	29	NA	NA	NA	NA	-1.10862	0.0124074	0.0183963	down	NA	NA	NA	NA	-1.57121	0.00163519	0.0029132	down	0.976779	0.017119	0.0384778	false	NA	NA	NA	NA	1A
TraesCS1A02G399600	18.15	21.77	20.24	30.2	31.85	29.24	18.47	15.27	16.8	32.09	33.32	31.3	456	518	490	755	748	696	418	371	400	782	818	770	0.952531	1.4448e-12	7.01268e-12	false	1.07486	1.67506e-24	8.18657e-24	up	0.941458	1.2242e-16	4.63234e-16	false	1.03503	1.16958e-15	5.51058e-15	up	-0.14405	0.258705	0.370143	false	0.0308773	0.777768	0.858691	false	1A
TraesCS1A02G400200	15.49	15.14	19.4	29.87	25.34	27.24	19.06	17.82	17.85	24.24	23.96	22.76	862	798	1040	1654	1318	1436	955	959	941	1308	1303	1240	1.07377	3.24161e-14	1.74768e-13	up	0.512598	3.7193e-11	1.06511e-10	false	0.758844	9.39731e-12	2.69309e-11	false	0.776493	1.47882e-11	5.29936e-11	false	0.235736	0.0332593	0.0681785	false	-0.27202	0.0115332	0.0315737	false	1A
TraesCS1A02G400500	7.78	6.75	7.89	18.36	19.25	21.28	23.29	22.97	23.25	24	22.13	20.23	420	345	410	986	971	1088	1132	1199	1189	1256	1167	1069	1.74241	3.77936e-36	5.12445e-35	up	0.0704246	0.391121	0.442568	false	1.81976	4.35588e-54	4.76042e-53	up	-0.057691	0.591393	0.644954	false	1.73876	1.76312e-62	1.68584e-60	up	0.11956	0.284534	0.427703	false	1A
TraesCS1A02G400600	1.56	1.11	1.6	4.35	3.34	4.8	1.36	1.59	1.13	2.43	2.55	2.5	79	53	78	219	158	230	62	78	54	119	126	124	1.90221	4.18677e-13	2.10591e-12	up	1.00948	3.48369e-05	6.78004e-05	up	1.0613	3.84392e-05	7.13429e-05	up	1.79886	1.13369e-12	4.38468e-12	up	0.0414974	0.886785	0.922814	false	-0.797062	0.000197626	0.00081075	false	1A
TraesCS1A02G400700	1.39	1.43	1.44	7.8	8.53	8.08	2.61	1.99	2.22	5.47	4.08	5.31	39	38	39	218	224	215	66	54	59	149	112	146	2.86848	1.08496e-30	1.23247e-29	up	1.26405	2.95444e-07	6.69998e-07	up	2.05839	1.02221e-13	3.29222e-13	up	2.02381	4.71524e-19	2.70689e-18	up	0.7839	0.0139353	0.0321501	false	-0.768587	9.11469e-05	0.000396136	false	1A
TraesCS1A02G401200	0	0	0	0	0	0	2.59	2.5	2.23	3.16	2.77	2.23	0	0	0	0	0	0	228	236	207	300	265	214	NA	NA	NA	NA	0.296707	0.0754658	0.0990663	false	10.7115	3.84635e-19	1.64557e-18	up	-10.0987	4.35228e-17	2.23945e-16	down	10.404	3.14317e-18	4.79992e-17	up	10.3865	4.83317e-18	8.2125e-17	up	1A
TraesCS1A02G401300	0.79	1.14	1.04	0.99	0.81	1.02	1.26	2.6	1.7	1.31	1.64	1.34	102	139	129	127	98	125	146	324	207	164	207	169	0.286682	0.267721	0.335395	false	-0.236428	0.295524	0.34434	false	0.790573	0.000257592	0.000444321	false	-0.791695	0.00264541	0.00458493	false	1.01599	2.83592e-05	0.000116045	up	0.547473	0.0120123	0.0327036	false	1A
TraesCS1A02G401400	1.08	1.27	0.87	1.02	1.56	1.43	0.4	0.44	0.42	0.78	0.72	0.8	120	133	93	112	162	150	40	47	44	84	78	87	0.660623	0.00977976	0.0174291	false	1.00892	0.000418353	0.000737048	up	-0.226843	0.373449	0.421252	false	1.84587	4.41954e-11	1.52786e-10	up	-1.24649	4.78247e-06	2.19093e-05	down	-0.846761	0.000556345	0.00209445	false	1A
TraesCS1A02G401800	0.04	0.03	0.01	0.99	0.81	0.9	0	0.08	0.01	0.48	0.82	0.54	3	2	1	81	62	70	0	6	1	38	66	43	5.51908	4.70338e-15	2.68357e-14	up	4.48096	3.99842e-10	1.07864e-09	up	4.86293	5.5108e-11	1.50552e-10	up	5.08401	7.245e-14	3.03308e-13	up	NA	NA	NA	NA	-0.612361	0.0646081	0.134642	false	1A
TraesCS1A02G402100	3.68	3.94	3.74	1.4	2.49	2.01	5.73	5.77	6.85	1.71	1.98	2.15	340	345	333	129	215	176	477	516	600	153	179	195	-0.603841	0.00339308	0.00658084	false	-1.5136	1.84521e-26	9.53047e-26	down	-0.703379	2.0958e-05	3.97596e-05	false	-1.46398	2.63861e-15	1.21263e-14	down	0.799951	2.28745e-10	1.66293e-09	false	-0.0597264	0.787459	0.865491	false	1A
TraesCS1A02G402200	1.46	2.05	1.5	1.17	1.67	0.95	1	0.89	1.28	0.68	0.4	0.62	246	327	242	196	263	152	151	145	203	111	66	102	-0.0540666	0.810496	0.8471	false	-0.756196	0.0014783	0.00245628	false	-1.29983	1.65044e-08	3.866e-08	down	0.439883	0.0566248	0.0791481	false	-0.554539	0.00351378	0.00954709	false	-1.20629	2.52009e-06	1.36861e-05	down	1A
TraesCS1A02G402400	1.82	1.8	2.01	7.16	7.68	9.08	2.46	2.43	2.71	5.77	6.28	6.09	173	162	184	676	681	816	210	223	244	531	582	566	2.43444	6.46559e-51	1.29347e-49	up	1.39219	1.4857e-29	8.29885e-29	up	1.94066	1.05034e-42	9.22382e-42	up	1.83519	2.27682e-35	2.52764e-34	up	0.537938	0.00125124	0.00377804	false	-0.451362	0.000436856	0.0016769	false	1A
TraesCS1A02G402500	12.85	10.75	13.05	7.21	6.81	8.74	22.8	20.82	21.36	11.09	8.93	8.71	778	616	761	434	385	501	1243	1219	1225	651	528	516	-0.337191	0.035352	0.0559604	false	-1.04018	4.0074e-25	1.99317e-24	down	-0.0975584	0.467649	0.515636	false	-1.33076	1.31438e-24	9.91816e-24	down	0.931941	2.11509e-19	3.53114e-18	false	0.282262	0.0620437	0.130365	false	1A
TraesCS1A02G402800	5.66	3.57	4.44	4.38	4.18	3.29	8.29	8.46	9.86	9.46	6.88	8.17	532	318	402	409	367	293	701	769	878	862	632	752	0.140176	0.478541	0.549057	false	0.0192908	0.867268	0.887359	false	1.09413	2.72437e-11	7.57745e-11	up	-0.984875	2.21177e-11	7.8376e-11	false	1.06461	5.76376e-13	5.45358e-12	up	0.995529	1.18378e-10	9.81361e-10	false	1A
TraesCS1A02G402900	11.66	9.84	11.87	16.33	15.26	17.11	8.85	9.76	8.65	19.97	16.46	17.51	562	449	551	783	687	781	384	455	395	933	775	826	0.895874	6.97803e-10	2.78292e-09	false	1.12075	1.20027e-24	5.89024e-24	up	0.946445	3.56041e-14	1.17728e-13	false	1.01934	1.375e-14	6.02157e-14	up	-0.184908	0.149478	0.239187	false	0.0930439	0.442923	0.58836	false	1A
TraesCS1A02G403000	1.5	1.55	1.48	8.91	7.75	9.54	7.12	8.36	7.74	10.28	10.47	11.35	76	74	72	448	366	457	324	409	371	504	517	562	2.88648	7.03278e-47	1.27593e-45	up	0.602943	3.00003e-07	6.79975e-07	false	3.0811	3.20234e-76	4.96742e-75	up	0.357118	0.0219758	0.0331006	false	2.46744	1.14227e-44	6.60251e-43	up	0.237962	0.0881481	0.173119	false	1A
TraesCS1A02G403300	860.65	708.72	839.03	740.69	565.05	632.72	891.83	964.54	948.79	252.63	265.95	255.27	29761	23211	27952	25487	18262	20727	27774	32260	31089	8472	8987	8644	0.0412381	0.754227	0.798782	false	-1.72077	0	0	down	-1.3841	5.88242e-63	7.47226e-62	down	-0.346757	0.00179741	0.003185	false	0.326445	6.09633e-05	0.00023645	false	-1.38158	1.35235e-38	6.84686e-37	down	1A
TraesCS1A02G403400	8.96	8.13	8.95	4.6	5.41	3.7	6.03	5.67	5.53	2.88	3.27	4.06	376	323	362	192	212	147	228	230	220	117	134	167	-0.580648	0.00236801	0.0047213	false	-0.618067	0.000733471	0.00126148	false	-1.09703	1.21178e-09	3.03301e-09	down	-0.152149	0.434394	0.493783	false	-0.4895	0.000657205	0.00210732	false	-0.475383	0.0303455	0.0721284	false	1A
TraesCS1A02G403800	0.3	0.32	0.29	14.18	14.65	13.7	1.36	1.19	1.63	5.12	5.18	6.82	13	13	12	611	593	562	53	50	67	215	219	289	5.90507	3.6724e-97	1.7234e-95	up	2.16927	3.42331e-23	1.61103e-22	up	4.49637	5.14047e-46	4.82015e-45	up	3.52716	3.29052e-82	1.042e-80	up	2.31675	1.84773e-08	1.11978e-07	up	-1.36656	8.04314e-20	1.57525e-18	down	1A
TraesCS1A02G404200	0.66	0.52	0.76	6.09	3.57	4.82	1.29	1.22	2.07	12.76	12.59	11.55	28	21	31	256	141	193	49	50	83	523	520	478	3.25184	5.50171e-25	5.04189e-24	up	3.14634	1.65271e-67	1.77759e-66	up	4.49654	1.14286e-93	2.25622e-92	up	1.8512	9.16932e-11	3.08695e-10	up	1.33913	0.000279432	0.00096667	up	1.28946	4.98566e-12	4.77176e-11	up	1A
TraesCS1A02G404300	7.34	8.11	7.14	2.92	3.68	2.73	4.23	4.05	5.14	2.96	2.46	3	1529	1599	1432	605	716	538	793	815	1014	597	501	612	-0.929812	1.08372e-12	5.30105e-12	false	-0.534209	2.20973e-06	4.71752e-06	false	-1.16774	1.58975e-27	9.44296e-27	down	-0.346413	0.0121857	0.0191697	false	-0.644107	4.13374e-10	2.925e-09	false	-0.197271	0.156845	0.272577	false	1A
TraesCS1A02G404400	0	0.16	0	0	0.01	0	0.16	0.36	0.37	0.36	0.67	0.65	0	11	0	0	1	0	11	26	26	26	49	48	NA	NA	NA	NA	1.05369	0.0212345	0.0304334	up	3.71804	0.0392513	0.0527591	false	NA	NA	NA	NA	NA	NA	NA	NA	6.75937	1.55344e-07	9.57446e-07	up	1A
TraesCS1A02G404500	156.37	168.83	157.06	307.19	306.36	311.78	175.11	174.92	173.73	470.1	457.78	476.04	16066	16429	15547	31408	29420	30347	16204	17383	16914	46843	45965	47896	1.2917	2.79727e-47	5.13175e-46	up	1.5598	0	0	up	1.79743	2.12564e-201	1.20388e-199	up	1.0031	4.23671e-40	5.389e-39	up	0.226925	0.000116368	0.000430317	false	0.548145	1.5115e-14	1.84883e-13	false	1A
TraesCS1A02G404800	10.95	9.58	7.11	0	0	0	0.44	1.07	1.18	0.16	0	0.04	275	228	172	0	0	0	10	26	28	4	0	1	-9.88641	3.20804e-16	1.95106e-15	down	NA	NA	NA	NA	-6.82618	7.66404e-23	3.85252e-22	down	NA	NA	NA	NA	-3.24616	1.95973e-27	5.59244e-26	down	NA	NA	NA	NA	1A
TraesCS1A02G405600	0.59	1.04	0.65	0.93	0.77	1.13	0.64	0.47	0.63	0.48	0.2	0.5	48	81	51	76	59	88	47	37	49	38	16	40	0.677668	0.0499131	0.0762438	false	-0.421779	0.306209	0.355596	false	-0.69193	0.100806	0.127001	false	0.896637	0.00741102	0.0120515	false	-0.281765	0.403424	0.522515	false	-1.32641	0.000533638	0.00201668	down	1A
TraesCS1A02G405800	9.01	8.81	8.35	1.87	1.44	1.72	4.48	4.67	4.86	0.62	1.01	0.78	776	719	693	160	116	140	348	389	397	52	85	66	-2.02611	3.01267e-32	3.60836e-31	down	-2.39977	1.16356e-37	7.80502e-37	down	-3.18265	8.87418e-75	1.3467e-73	down	-1.29458	1.14984e-12	4.44571e-12	down	-0.793103	1.15624e-12	1.06527e-11	false	-1.11296	2.96001e-05	0.000138984	down	1A
TraesCS1A02G406200	2.16	1.77	2.06	2.99	3.18	2.99	2.06	1.92	2.42	3.65	2.76	3.77	268	208	247	369	369	352	230	230	285	439	335	458	0.959822	1.90523e-08	6.78144e-08	false	0.807599	1.23859e-07	2.87922e-07	false	1.01722	9.26551e-10	2.33542e-09	up	0.699825	1.24599e-05	2.7975e-05	false	0.199283	0.223213	0.329505	false	0.0988895	0.520174	0.657746	false	1A
TraesCS1A02G406300	1.8	2.47	1.64	25.08	18.56	26.44	5.04	5.04	4.5	74.01	76.28	75.01	59	77	52	820	570	823	149	160	140	2358	2449	2413	3.92729	1.99125e-76	6.70979e-75	up	4.08847	0	0	up	5.51027	0	0	up	2.45354	3.59328e-44	5.09918e-43	up	1.4109	2.11874e-09	1.40455e-08	up	1.62723	1.73055e-36	8.0613e-35	up	1A
TraesCS1A02G406500	0.88	0.95	0.64	2.46	1.3	2.64	9.04	10.63	9.54	1.67	2.24	2.24	34	35	24	95	47	97	316	399	351	63	85	85	1.73545	1.01183e-05	2.78403e-05	up	-2.11092	4.64904e-31	2.69455e-30	down	1.57231	4.2034e-06	8.42674e-06	up	-2.00133	7.13445e-17	3.62009e-16	down	3.67265	1.06926e-62	1.02907e-60	up	-0.116801	0.715416	0.813585	false	1A
TraesCS1A02G406700	0	0.01	0.03	0.03	0	0.01	3.54	3.42	3.49	0.65	0.37	0.47	0	1	2	2	0	1	237	246	246	47	27	34	NA	NA	NA	NA	-2.67308	8.20295e-30	4.6101e-29	down	NA	NA	NA	NA	-7.77462	2.04618e-19	1.20088e-18	down	8.07996	3.10051e-21	5.9408e-20	up	NA	NA	NA	NA	1A
TraesCS1A02G407000	0.25	0.16	0.18	0	0	0.02	5.94	5.77	5.56	0.02	0.04	0.02	25	15	17	0	0	2	529	552	521	2	4	2	NA	NA	NA	NA	-7.56474	1.44305e-46	1.14721e-45	down	NA	NA	NA	NA	-9.49563	3.90313e-20	2.38423e-19	down	4.96945	6.74769e-100	1.44e-97	up	NA	NA	NA	NA	1A
TraesCS1A02G407600	17.83	17.27	16.92	7.29	8.11	7.73	122.7	119.32	123.14	32.95	32.87	33.29	1681	1542	1537	684	715	690	10419	10881	11002	3013	3029	3074	-0.820762	5.24207e-13	2.61997e-12	false	-1.74381	0	0	down	1.18521	6.83649e-56	7.68667e-55	up	-3.80053	0	0	down	2.91849	0	0	up	2.04782	7.68992e-114	2.76208e-111	up	1A
TraesCS1A02G407700	11.93	14.28	10.41	3.21	4.56	3.28	1.22	1.81	1.36	0	0.03	0.09	714	809	600	191	255	186	66	105	77	0	2	5	-1.38317	5.54111e-15	3.14513e-14	down	-5.0621	6.97778e-15	2.41165e-14	down	-7.99743	4.70507e-45	4.33904e-44	down	1.50152	3.50076e-10	1.12781e-09	up	-2.94531	4.33306e-65	4.4003e-63	down	-6.57389	3.38137e-28	1.11367e-26	down	1A
TraesCS1A02G407800	0	0	0	0.37	0.19	0.28	0.93	0.63	1.48	0.14	0.09	0.08	0	0	0	25	12	18	56	41	94	9	6	5	NA	NA	NA	NA	-3.17236	8.05825e-10	2.13949e-09	down	NA	NA	NA	NA	-1.64318	0.000351477	0.000678847	down	8.58999	5.78641e-12	4.96098e-11	up	NA	NA	NA	NA	1A
TraesCS1A02G408300	45.13	44.38	47.87	2.93	2	3.02	53.38	64.29	60.7	0.62	0.69	0.72	1734	1615	1772	112	72	110	1847	2389	2210	23	26	27	-3.75351	8.36942e-113	5.01622e-111	down	-6.3221	4.01173e-249	1.75797e-247	down	-5.82719	2.67928e-197	1.45908e-195	down	-4.2998	3.6928e-169	3.76957e-167	down	0.484506	6.63328e-08	3.80466e-07	false	-2.03072	2.29333e-09	1.66673e-08	down	1A
TraesCS1A02G408700	2.03	2.23	1.8	1.58	1.17	1.7	1.1	1.15	0.99	0.73	1	0.6	150	156	128	116	81	119	73	82	69	52	72	43	-0.0873122	0.734636	0.782047	false	-0.341841	0.252421	0.298876	false	-1.12993	3.28071e-05	6.12089e-05	down	0.648967	0.0195453	0.0296988	false	-0.798714	0.000377786	0.00127196	false	-0.998205	0.000939547	0.00337787	false	1A
TraesCS1A02G408800	0	0	0	0	0	0	0.86	0.93	0.51	3.31	2.76	2.99	0	0	0	0	0	0	69	80	43	286	240	261	NA	NA	NA	NA	2.11576	3.81786e-22	1.73602e-21	up	10.7256	2.93008e-19	1.26101e-18	up	-8.29455	4.86851e-11	1.67801e-10	down	8.59922	4.14373e-12	3.61365e-11	up	10.4004	3.71343e-18	6.38393e-17	up	1A
TraesCS1A02G408900	6.55	7.77	6.2	1.09	1.48	1.61	11.28	12.34	13.57	7.8	6.72	6.85	412	463	376	68	87	96	639	751	809	476	413	422	-1.94949	1.77242e-20	1.33601e-19	down	-0.662357	2.83737e-09	7.29526e-09	false	0.315186	0.023161	0.0321442	false	-2.97759	9.76933e-65	2.20744e-63	down	0.966739	2.71045e-15	3.20509e-14	false	2.30627	1.67633e-34	7.12316e-33	up	1A
TraesCS1A02G409200	2.6	2.85	1.77	1.16	1.95	1.28	0.37	0.23	0.62	0	0	0	258	268	169	115	181	120	33	22	58	0	0	0	-0.374968	0.132415	0.181434	false	NA	NA	NA	NA	-10.0497	7.62712e-17	2.91525e-16	down	2.0291	2.54639e-09	7.6682e-09	up	-2.46403	1.00413e-17	1.46685e-16	down	-9.63494	2.24655e-15	2.96854e-14	down	1A
TraesCS1A02G409800	1.25	1.13	0.58	8.36	8.78	8.97	0.95	1.03	1.19	7.83	6.76	7.37	101	86	45	671	662	686	69	80	91	613	533	582	3.49225	2.83636e-61	7.19275e-60	up	2.93082	2.12631e-79	2.62336e-78	up	3.14733	1.29493e-55	1.44848e-54	up	3.22468	5.64954e-84	1.84284e-82	up	0.206094	0.489834	0.605012	false	-0.302428	0.0115019	0.0314973	false	1A
TraesCS1A02G410300	21.11	18.58	20.24	8.99	9.68	9.71	19.66	22.03	19.94	8.21	7.89	6.58	1400	1167	1293	593	600	610	1174	1413	1253	528	511	427	-0.730168	4.84763e-09	1.8074e-08	false	-1.3059	2.12646e-38	1.44873e-37	down	-1.14797	8.4781e-23	4.25471e-22	down	-0.938782	7.71153e-17	3.90378e-16	false	0.147409	0.116324	0.195057	false	-0.375826	0.00429764	0.0132137	false	1A
TraesCS1A02G410500	0.6	0.49	0.39	1.77	0.6	0.97	0.44	0.58	0.49	1.97	2.1	1.76	32	25	20	94	30	49	21	30	25	102	110	92	1.54018	0.00106735	0.0022564	up	2.08389	1.54896e-11	4.5291e-11	up	2.23064	6.65671e-12	1.92499e-11	up	1.34076	0.00334231	0.00571321	up	NA	NA	NA	NA	0.738363	0.035213	0.0815595	false	1A
TraesCS1A02G410800	14.04	12.85	16.9	7.62	5.51	9.63	24.68	23.8	25.58	5.36	3.45	3.49	300	260	348	162	110	195	475	492	518	111	72	73	-0.588418	0.0123188	0.0215329	false	-2.45389	1.51308e-46	1.2024e-45	down	-1.57845	1.0722e-12	3.2539e-12	down	-1.51498	7.65668e-15	3.41392e-14	down	0.864574	2.27437e-10	1.65404e-09	false	-0.946407	0.000591826	0.00221445	false	1A
TraesCS1A02G411100	0.42	0.65	0.61	7.53	6.18	6.08	0.27	0.48	0.33	10.94	12.1	11.75	37	54	51	655	505	504	21	41	27	928	1034	1006	3.91607	3.07977e-73	9.83327e-72	up	5.14225	2.66215e-168	7.01903e-167	up	4.63155	7.66447e-165	3.1594e-163	up	4.37757	1.9541e-78	5.78675e-77	up	-0.52721	0.173238	0.269512	false	0.758067	3.03404e-09	2.17955e-08	false	1A
TraesCS1A02G411200	1.93	0.83	1.63	61.36	46.32	54.81	0.27	0.09	0.09	41.43	39.07	35.79	113	46	92	3577	2536	3042	14	5	5	2354	2237	2053	5.56075	6.06117e-50	1.18604e-48	up	8.19407	3.17202e-158	7.79157e-157	up	4.97769	2.62484e-51	2.7225e-50	up	8.72017	1.24821e-101	5.33516e-100	up	-3.2175	3.88023e-11	3.05297e-10	down	-0.539465	5.19491e-06	2.70695e-05	false	1A
TraesCS1A02G411500	3.49	3.18	2.7	4.43	3.6	3.25	3.75	4.4	3.58	7.79	8.16	8.83	228	197	170	288	220	201	221	278	222	494	521	565	0.62096	0.00319842	0.00623154	false	1.2141	1.63375e-20	7.04331e-20	up	1.65725	6.38938e-29	3.97112e-28	up	0.126371	0.513484	0.571283	false	0.432666	0.0117192	0.027627	false	1.07956	1.17766e-11	1.08112e-10	up	1A
TraesCS1A02G411600	0.98	1.22	1.55	12.25	13.96	11.43	1.62	1.47	1.44	14.95	14.58	14.99	107	126	162	1327	1420	1178	159	155	149	1578	1551	1598	3.67596	4.03187e-113	2.4338e-111	up	3.43267	2.26892e-243	9.62435e-242	up	3.82668	3.24904e-183	1.55882e-181	up	3.23169	2.14827e-128	1.33963e-126	up	0.383107	0.0691708	0.12668	false	0.191413	0.053906	0.116151	false	1A
TraesCS1A02G412200	0	0	0	0.19	0.05	0.17	0.03	0.03	0.08	2.76	2.67	2.06	0	0	0	13	3	11	2	2	5	181	176	136	NA	NA	NA	NA	5.85851	1.57534e-27	8.36104e-27	up	10.0513	7.88675e-17	3.01259e-16	up	NA	NA	NA	NA	NA	NA	NA	NA	4.11332	7.78807e-26	2.2635e-24	up	1A
TraesCS1A02G413300	18.26	14.23	17.38	8.99	8.69	9.78	9.6	8.22	8.84	6.44	5.75	7.64	737	544	676	361	328	374	349	321	338	252	227	302	-0.511184	0.00144195	0.00298022	false	-0.288781	0.0508492	0.0688143	false	-1.07716	2.23052e-12	6.63683e-12	down	0.22631	0.139596	0.180098	false	-0.798773	1.94952e-09	1.29586e-08	false	-0.52366	0.0013151	0.00457818	false	1A
TraesCS1A02G413600	2.41	2.18	1.99	0.34	0.58	0.24	1.97	2.12	2.46	0.34	0.51	0.29	341	291	271	48	76	32	250	289	329	46	71	40	-2.17023	1.58098e-15	9.27229e-15	down	-2.38306	6.77088e-27	3.53294e-26	down	-2.27512	3.9867e-22	1.9471e-21	down	-2.32777	5.50876e-19	3.15319e-18	down	0.0979059	0.517804	0.630463	false	-0.0644693	0.86858	0.919905	false	1A
TraesCS1A02G414000	30.66	30.21	32.77	178.22	147.52	164.35	13.33	15.57	14.62	107.74	104.17	104.16	912	851	939	5275	4101	4631	357	448	412	3108	3028	3034	2.742	7.29827e-113	4.38758e-111	up	2.99649	0	0	up	2.01021	9.25599e-134	2.84761e-132	up	3.67766	7.19104e-213	1.11704e-210	up	-0.997312	2.53135e-19	4.20465e-18	false	-0.688527	3.42485e-12	3.32981e-11	false	1A
TraesCS1A02G414100	0.05	0	0	4.91	4.18	5.42	0.54	0.91	0.15	9.57	10.2	8.48	1	0	0	100	80	105	10	18	3	190	204	170	8.42005	7.12148e-12	3.29305e-11	up	4.26787	1.01665e-33	6.27673e-33	up	9.28298	1.10106e-14	3.75092e-14	up	3.35356	7.19883e-14	3.01458e-13	up	NA	NA	NA	NA	0.906618	3.91549e-05	0.000180508	false	1A
TraesCS1A02G414200	0.02	0	0.19	3.67	2.8	2.67	0.4	0.65	0.17	3.39	4.05	4.94	1	0	8	163	117	113	16	28	7	147	177	216	5.80572	3.98466e-08	1.38273e-07	up	3.48596	5.9695e-26	3.04135e-25	up	6.14506	4.02501e-09	9.77809e-09	up	3.09656	7.92047e-16	3.77306e-15	up	NA	NA	NA	NA	0.381194	0.0944115	0.182873	false	1A
TraesCS1A02G414400	0.67	0.11	0.44	2.21	1.94	2.94	0.07	0.23	0.26	0.77	1.01	0.72	33	5	21	109	90	138	3	11	12	37	49	35	2.89035	3.13829e-11	1.38387e-10	up	NA	NA	NA	NA	NA	NA	NA	NA	3.85634	7.15134e-19	4.06772e-18	up	NA	NA	NA	NA	-1.55743	3.50688e-07	2.09693e-06	down	1A
TraesCS1A02G414500	0.06	0.19	0.17	1	0.58	0.84	0.03	0.12	0.03	0	0.03	0.06	4	12	11	66	36	53	2	8	2	0	2	4	2.88667	6.60686e-08	2.2499e-07	up	NA	NA	NA	NA	NA	NA	NA	NA	3.84849	9.00086e-10	2.80538e-09	up	NA	NA	NA	NA	-4.77019	1.63583e-10	1.34035e-09	down	1A
TraesCS1A02G414600	3.74	3.59	5.7	8.17	5.59	10.27	4.47	5.54	5.08	6.44	6.13	7.8	143	130	210	311	200	372	154	205	184	239	229	292	1.24051	1.34006e-06	4.04561e-06	up	0.568435	0.000803425	0.00137579	false	0.898881	1.86824e-05	3.56068e-05	false	0.85889	0.000140254	0.000283868	false	0.319768	0.128683	0.211925	false	-0.29743	0.160911	0.277867	false	1A
TraesCS1A02G414700	0.41	0.44	0.62	13.76	11.95	13.78	0.66	1.38	1.16	16.68	19.38	18.3	9	9	13	298	243	284	13	29	24	352	412	390	5.10181	1.24483e-51	2.53152e-50	up	4.21212	1.75992e-69	1.94122e-68	up	5.46479	6.13021e-70	8.63163e-69	up	3.79943	2.14097e-42	2.89548e-41	up	NA	NA	NA	NA	0.406064	0.0088957	0.0251191	false	1A
TraesCS1A02G415100	10.34	10.87	8.92	83.97	68.94	67.68	32.92	39.3	33.61	145.49	151.2	146.39	225	224	187	1818	1402	1395	645	827	693	3070	3215	3119	3.22691	3.06841e-101	1.55091e-99	up	2.20193	1.50726e-186	4.52633e-185	up	4.13383	0	0	up	1.24379	3.34237e-21	2.1555e-20	up	1.92105	3.70072e-47	2.27529e-45	up	0.950454	1.20264e-18	2.15037e-17	false	1A
TraesCS1A02G415200	127.64	123.17	124.53	36.83	40.06	36.22	131.26	133.58	137.55	21.35	19.55	21.38	20476	18714	19247	5879	6007	5505	18964	20726	20909	3321	3065	3358	-1.3818	3.08459e-54	6.68263e-53	down	-2.55458	0	0	down	-2.33651	5.19145e-262	4.50251e-260	down	-1.65046	5.90255e-104	2.6073e-102	down	0.20754	0.000461078	0.00152587	false	-0.913081	4.23796e-29	1.44841e-27	false	1A
TraesCS1A02G415800	1.73	0.78	1.87	0.9	0.6	0.49	0.8	1.53	1.58	0.28	0.35	0.36	108	46	112	56	35	29	45	92	93	17	21	22	-0.781409	0.0558696	0.0843861	false	-1.84885	1.61554e-06	3.48403e-06	down	-1.89985	4.35834e-06	8.72815e-06	down	-0.781154	0.0418299	0.0599655	false	-0.0601008	0.858808	0.903266	false	NA	NA	NA	NA	1A
TraesCS1A02G416200	2.59	2.37	2.09	0.95	0.65	1.41	2.05	1.82	1.99	0.21	0.38	0.52	188	163	146	69	44	97	134	128	137	15	27	37	-0.868137	0.00394392	0.00756001	false	-2.25762	2.26919e-13	7.29604e-13	down	-2.40631	1.69692e-14	5.71909e-14	down	-0.771647	0.00931556	0.0149335	false	-0.15922	0.408434	0.527526	false	-1.49403	0.000364085	0.0014198	down	1A
TraesCS1A02G416700	0.85	0.06	0.44	7.44	4.41	8.6	0.88	2.02	2.51	13.25	13.15	12.26	16	1	8	140	78	154	15	37	45	243	243	227	4.27329	1.72713e-18	1.18259e-17	up	2.96618	6.66758e-30	3.75464e-29	up	5.09001	1.92861e-12	5.76275e-12	up	2.10365	2.10626e-08	5.92205e-08	up	NA	NA	NA	NA	0.859122	0.000254718	0.00102436	false	1A
TraesCS1A02G418300	15.17	14.17	16.07	25.31	25.38	24.19	18.49	18.32	18.79	38.59	37.68	37.04	1426	1261	1455	2367	2229	2154	1565	1665	1673	3517	3461	3409	1.07134	2.46126e-22	2.0139e-21	up	1.16477	3.15071e-93	4.53119e-92	up	1.57391	9.35452e-83	1.5847e-81	up	0.61152	1.84369e-11	6.56815e-11	false	0.398622	2.51493e-06	1.19681e-05	false	0.54467	5.69543e-11	4.86706e-10	false	1A
TraesCS1A02G418700	26.5	35.1	31.26	4.99	7.11	5.79	17.02	16.59	18.27	2.7	3.01	3.2	3911	4905	4444	733	980	810	2262	2367	2555	386	434	463	-2.03009	6.45331e-53	1.35531e-51	down	-2.40378	2.3397e-184	6.91476e-183	down	-3.12438	6.61141e-188	3.32394e-186	down	-1.35979	4.54182e-32	4.57701e-31	down	-0.731346	2.20194e-15	2.63124e-14	false	-1.05377	3.10327e-14	3.68227e-13	down	1A
TraesCS1A02G418800	244.88	247.71	299.68	110.51	135.66	136.61	211.05	200.31	181.03	61.92	77.64	52.89	5603	5368	6606	2516	2901	2961	4349	4433	3925	1374	1736	1185	-0.702772	3.53409e-09	1.33052e-08	false	-1.48448	3.54347e-17	1.35383e-16	down	-1.78638	4.20137e-51	4.33921e-50	down	-0.451462	9.41902e-06	2.14063e-05	false	-0.312538	0.000557916	0.00181452	false	-1.04192	8.55537e-16	1.17678e-14	down	1A
TraesCS1A02G418900	0	0.02	0.03	0.47	0.52	0.43	0.09	0.1	0.17	0.17	0.2	0.17	0	2	3	45	46	39	8	9	15	16	19	16	5.06292	3.80785e-10	1.54629e-09	up	NA	NA	NA	NA	NA	NA	NA	NA	2.17464	1.36753e-05	3.05918e-05	up	NA	NA	NA	NA	-1.42666	0.00108817	0.00385516	down	1A
TraesCS1A02G419000	13.43	8.5	10.5	0.27	0.7	0.34	5.13	3.37	2.47	0	0.06	0.06	247	148	186	5	12	6	85	60	43	0	1	1	-4.2913	3.08034e-24	2.74161e-23	down	-6.48248	4.07473e-09	1.03725e-08	down	-7.93222	5.8553e-14	1.91232e-13	down	-2.89245	4.54369e-08	1.24496e-07	down	-1.46207	4.31657e-08	2.52253e-07	down	NA	NA	NA	NA	1A
TraesCS1A02G419100	46.77	43.98	41.09	1.91	0.65	2.11	37.68	37.11	30.24	0.56	1.11	1.14	1381	1230	1169	56	18	59	1002	1060	846	16	32	33	-4.45279	8.30661e-21	6.37035e-20	down	-5.08635	1.31108e-139	2.8137e-138	down	-5.29654	3.93267e-153	1.45998e-151	down	-4.29576	6.45007e-19	3.67848e-18	down	-0.220843	0.0357104	0.0724741	false	-0.797395	0.104029	0.19751	false	1A
TraesCS1A02G419200	75.24	71.29	72	1.81	1.12	1.06	45.29	42.69	40.52	1.04	0.26	0.94	1793	1609	1653	43	25	24	972	984	915	24	6	22	-5.41263	1.08012e-156	1.1109e-154	down	-5.70638	9.57812e-40	6.71335e-39	down	-6.35438	9.5959e-50	9.66319e-49	down	-4.8151	6.31869e-120	3.52737e-118	down	-0.659311	2.98663e-14	3.19841e-13	false	NA	NA	NA	NA	1A
TraesCS1A02G419300	49.27	40.75	34.3	0.99	0.89	1	19.56	19.35	19.31	0	0.08	0.46	1306	1023	876	26	22	25	467	496	485	0	2	12	-5.08601	1.35815e-101	6.91204e-100	down	-6.61778	2.88526e-09	7.41392e-09	down	-7.59585	1.87763e-11	5.27929e-11	down	-4.15948	7.61785e-71	1.96053e-69	down	-0.987946	7.94577e-15	8.99147e-14	false	NA	NA	NA	NA	1A
TraesCS1A02G419400	4.28	4.86	4.52	1.9	1.56	1.78	5.19	3.38	2.2	1.43	1.62	0.9	170	183	173	75	58	67	186	130	83	55	63	35	-1.02761	5.23954e-05	0.000132523	down	-1.31037	4.31916e-05	8.33478e-05	down	-1.53391	6.53994e-09	1.56887e-08	down	-0.855442	0.00687903	0.01124	false	-0.235416	0.342786	0.460643	false	-0.462831	0.165874	0.284306	false	1A
TraesCS1A02G419600	2.19	2.89	2.73	4.98	5.31	5.04	3.11	3.24	3.3	36.99	35.06	36.06	221	277	266	501	502	483	283	317	316	3625	3463	3569	1.32497	2.80661e-16	1.71381e-15	up	3.62232	0	0	up	4.04835	0	0	up	0.849025	8.45441e-10	2.64144e-09	false	0.414385	0.00634059	0.0161273	false	2.76479	1.47431e-196	1.87106e-193	up	1A
TraesCS1A02G420100	2.47	1.3	1.36	18.53	12.75	15.78	4.15	5.76	5.6	14.63	13.29	15.83	143	71	76	1066	689	864	216	322	307	820	751	896	3.54862	4.072e-55	9.0103e-54	up	1.63094	3.78587e-37	2.51324e-36	up	3.33991	1.39385e-70	1.98231e-69	up	1.78801	1.72388e-24	1.29391e-23	up	1.69908	3.11323e-13	3.03641e-12	up	-0.163893	0.261164	0.401342	false	1A
TraesCS1A02G420300	7.9	7.77	7.65	10	11.17	10.16	6.34	6.53	5.69	11.78	11.01	11.33	1065	991	993	1341	1407	1297	769	851	726	1539	1450	1495	0.774597	2.03686e-12	9.78741e-12	false	1.01599	4.72245e-35	3.00039e-34	up	0.804264	7.04122e-20	3.1144e-19	false	0.935566	7.30408e-18	3.93218e-17	false	-0.22237	0.0220819	0.0479316	false	0.0712882	0.447179	0.592387	false	1A
TraesCS1A02G420500	5.06	5.45	5.67	7.53	9.49	8.33	3.8	3.85	4.19	7.18	6.92	7.22	558	569	602	826	978	870	377	411	438	768	746	780	0.994494	2.45905e-14	1.33603e-13	false	0.986081	1.52011e-22	7.01587e-22	false	0.654646	1.57205e-09	3.90871e-09	false	1.27574	3.33055e-24	2.46993e-23	up	-0.342108	0.0034571	0.00941133	false	-0.298885	0.00811317	0.0231811	false	1A
TraesCS1A02G420700	23.24	21.09	20.8	0.76	0.54	0.85	18.74	22.91	21.16	0.44	0.48	0.42	1479	1271	1275	48	32	51	1074	1410	1276	27	30	26	-4.57164	3.36279e-126	2.42104e-124	down	-5.41718	1.69682e-179	4.86999e-178	down	-5.35135	4.7267e-167	1.98059e-165	down	-4.68869	1.32958e-139	9.48937e-138	down	0.0555198	0.575471	0.681728	false	-0.737302	0.0697537	0.143183	false	1A
TraesCS1A02G420900	65.1	66.39	65.48	18.32	15.52	16.82	54.6	54.27	56.66	10.12	9.54	9.63	6346	6129	6149	1777	1414	1553	4793	5117	5234	957	909	919	-1.60505	8.54743e-47	1.54692e-45	down	-2.36109	0	0	down	-2.49389	2.6922e-252	2.17678e-250	down	-1.52336	2.52117e-51	4.24414e-50	down	-0.143423	0.0204051	0.0447937	false	-0.845689	1.30795e-14	1.60812e-13	false	1A
TraesCS1A02G421000	7.47	8.88	8.37	3.96	2.98	3.19	5.54	5.68	4.78	2.59	2.04	2.69	800	901	864	422	298	324	535	589	485	269	214	282	-0.930221	7.58612e-09	2.78326e-08	false	-0.991744	6.24095e-13	1.96272e-12	false	-1.49911	5.53891e-28	3.33826e-27	down	-0.474216	0.00347479	0.00592532	false	-0.518362	4.54335e-06	2.08723e-05	false	-0.525621	0.00329945	0.010458	false	1A
TraesCS1A02G421200	0	0.06	0.06	0.96	0.94	1.31	0.32	0.05	0.16	1.02	0.58	1.34	0	4	4	64	59	83	19	3	10	66	38	88	5.05345	1.0973e-14	6.11194e-14	up	2.65188	1.92368e-07	4.41924e-07	up	4.82785	6.70912e-13	2.06271e-12	up	2.8269	1.46083e-08	4.16303e-08	up	NA	NA	NA	NA	-0.182711	0.595276	0.720545	false	1A
TraesCS1A02G421600	1.3	1.35	1.35	1.18	0.63	1.1	2.84	3.96	3.17	1.43	1.55	1.68	99	97	99	89	45	79	194	291	228	105	115	125	-0.0992198	0.754963	0.799447	false	-0.962507	6.51979e-07	1.44534e-06	false	0.472568	0.0433366	0.0578975	false	-1.58637	1.83378e-09	5.57924e-09	down	1.42464	4.35913e-13	4.17688e-12	up	0.616941	0.0318032	0.0749413	false	1A
TraesCS1A02G421900	0	0	0	2.23	1.78	2.18	0.04	0.15	0.19	1.68	0.6	1.62	0	0	0	60	45	56	1	4	5	44	16	43	8.55737	1.20275e-11	5.47205e-11	up	3.45313	1.07268e-06	2.34005e-06	up	7.79205	3.35082e-09	8.17681e-09	up	4.1658	3.34112e-11	1.16807e-10	up	NA	NA	NA	NA	-0.722836	0.0798211	0.159816	false	1A
TraesCS1A02G422100	0.8	1.15	0.75	0.78	0.61	0.65	3.19	2.57	2.77	2.32	2.32	2.48	82	111	74	79	58	63	293	254	268	230	231	248	-0.0497609	0.873918	0.90041	false	-0.122162	0.416879	0.468461	false	1.6554	4.94407e-15	1.72087e-14	up	-1.87906	3.16283e-17	1.64104e-16	down	1.76686	4.58405e-19	7.48131e-18	up	1.74844	1.11042e-15	1.50991e-14	up	1A
TraesCS1A02G422600	1.98	2.15	1.5	0.7	1.06	0.73	0.69	0.61	0.59	0.3	0.4	0.43	210	216	153	74	105	73	66	62	59	31	41	45	-0.834481	0.00119277	0.0024996	false	-0.597797	0.0664956	0.0881817	false	-2.05947	2.16968e-14	7.26497e-14	down	0.576768	0.0535032	0.0751549	false	-1.47283	9.91182e-11	7.47416e-10	down	-1.18448	0.000278414	0.00111145	down	1A
TraesCS1A02G423100	1.39	1.47	1.23	2.52	2.45	2.25	0.99	0.88	0.85	1.91	1.62	2.28	186	186	158	335	306	285	119	114	108	247	211	298	1.17212	1.72348e-10	7.19164e-10	up	1.2281	7.16882e-11	2.02036e-10	up	0.759717	5.0242e-05	9.23618e-05	false	1.58957	1.70254e-17	8.98568e-17	up	-0.479108	0.0140967	0.0324817	false	-0.370252	0.0311373	0.0736431	false	1A
TraesCS1A02G423700	2.36	1.92	2.17	5.73	5.9	7.07	3.65	3.61	2.79	3.98	5.39	4.87	114	88	101	276	267	324	159	169	128	187	255	231	1.88656	2.58963e-19	1.84506e-18	up	0.641192	0.000629629	0.00108992	false	1.39888	2.37428e-11	6.63069e-11	up	1.07754	2.83116e-08	7.8803e-08	up	0.747428	0.000506512	0.00166195	false	-0.444811	0.0131235	0.0353397	false	1A
TraesCS1A02G423800	3.3	2.27	2.29	83.14	59.02	69.58	11.12	11.96	11.03	92.01	94.02	88.4	106	69	71	2661	1774	2120	322	372	336	2870	2955	2784	5.10672	1.02656e-166	1.18137e-164	up	3.14525	0	0	up	5.3778	0	0	up	2.82176	1.29963e-86	4.40244e-85	up	2.22301	6.76256e-33	2.47247e-31	up	0.316353	0.0102205	0.0284174	false	1A
TraesCS1A02G424000	5.89	5.13	4.93	0.53	0.24	0.52	4.38	4.05	4.34	0.12	0.17	0.19	454	374	366	41	17	38	304	302	317	9	13	14	-3.2646	2.05894e-33	2.56925e-32	down	-4.59969	1.1868e-54	1.077e-53	down	-4.80317	1.32786e-57	1.53845e-56	down	-3.11308	1.13944e-31	1.13508e-30	down	-0.213997	0.115574	0.194013	false	NA	NA	NA	NA	1A
TraesCS1A02G424100	0.2	0.28	0.24	391.04	341.5	341.37	0.03	0.15	0.1	66.37	70.93	69.48	15	20	17	29213	23962	24278	2	11	7	4832	5204	5108	10.9076	0	0	up	9.64619	2.90017e-190	8.902e-189	up	8.43302	0	0	up	12.0702	5.10423e-279	1.45547e-276	up	NA	NA	NA	NA	-2.43158	2.65045e-160	1.78079e-157	down	1A
TraesCS1A02G424700	0.57	0.67	0.7	0.25	0.11	0	1.23	1.55	0.76	0.49	0.31	0.4	28	31	33	12	5	0	54	73	35	23	15	19	NA	NA	NA	NA	-1.42483	0.000781186	0.00133983	down	NA	NA	NA	NA	-3.10796	1.373e-06	3.34571e-06	down	0.969815	0.0093545	0.022675	false	NA	NA	NA	NA	1A
TraesCS1A02G424800	1.76	2.69	1.65	3.14	2.91	3.99	1.2	1.75	1.7	1.69	2.71	1.9	70	101	63	124	108	150	43	67	64	65	105	74	1.07639	0.000175684	0.00041535	up	0.573536	0.0553365	0.0743806	false	0.306107	0.316896	0.363655	false	1.29176	4.70406e-06	1.09707e-05	up	-0.278037	0.355928	0.474495	false	-0.726172	0.00672133	0.0196482	false	1A
TraesCS1A02G425000	56.84	56.5	58.68	23.24	22.74	23.29	26.34	25.02	24.83	25.96	22.81	23.77	4346	4091	4322	1768	1625	1687	1814	1850	1799	1925	1704	1780	-0.961196	1.42065e-21	1.12682e-20	false	0.0667108	0.339523	0.390225	false	-0.99041	4.14963e-36	3.14041e-35	false	0.0450555	0.634827	0.685101	false	-1.06781	6.69572e-52	4.79778e-50	down	0.0130586	0.890996	0.934335	false	1A
TraesCS1A02G425400	5.8	5.9	5.52	7.65	5.03	5.88	2.26	2.32	2.68	1.42	1.62	1.22	359	346	329	471	291	345	126	139	157	85	98	74	0.467046	0.0147019	0.0252978	false	-0.632386	0.00469983	0.00736715	false	-1.76054	1.54518e-20	7.04749e-20	down	1.54353	4.73282e-14	2.00347e-13	up	-1.13832	7.36606e-13	6.90672e-12	down	-2.183	4.34835e-24	1.14229e-22	down	1A
TraesCS1A02G425700	6.16	5.56	5.73	2.15	2.27	2.75	5.75	5.94	5.7	3.24	3.24	3.45	582	498	522	202	201	246	490	543	511	297	299	319	-0.933968	3.48772e-08	1.21562e-07	false	-0.673154	9.60908e-09	2.39164e-08	false	-0.560083	2.39255e-05	4.51557e-05	false	-1.0981	2.31579e-12	8.77719e-12	down	0.102605	0.363739	0.48244	false	0.416277	0.0133448	0.0358456	false	1A
TraesCS1A02G426300	1.03	0.86	0.51	1.23	1.05	0.68	0.38	0.46	0.55	0.44	0.63	0.83	87	69	42	104	83	55	29	38	44	36	52	69	0.657613	0.0634222	0.0946077	false	0.583417	0.111186	0.141482	false	-0.0855508	0.814922	0.84009	false	1.27518	0.000313074	0.000608096	up	-0.678731	0.0531986	0.101724	false	-0.700172	0.0404689	0.0915972	false	1A
TraesCS1A02G426700	35.61	31.54	34.51	11.24	9.44	9.57	30.84	32.98	33.76	5.38	4.38	4.4	2655	2227	2479	834	658	676	2071	2378	2385	389	319	321	-1.39559	3.2114e-27	3.22374e-26	down	-2.64824	3.6706e-187	1.10766e-185	down	-2.58998	2.13839e-123	5.9152e-122	down	-1.50467	2.82553e-39	3.50662e-38	down	0.047705	0.560421	0.668533	false	-1.1515	1.25468e-15	1.69718e-14	down	1A
TraesCS1A02G426800	0	0.04	0.07	24.69	17.18	19.59	0.07	0.02	0	3.25	4.76	4.86	0	2	3	1168	763	882	3	1	0	150	221	226	9.50362	9.40702e-46	1.66124e-44	up	7.30038	6.52087e-22	2.94446e-21	up	7.14462	5.00381e-25	2.73181e-24	up	9.60785	1.74075e-38	2.11161e-37	up	NA	NA	NA	NA	-2.31389	5.48862e-39	2.82902e-37	down	1A
TraesCS1A02G426900	3.45	3.04	3.62	0.9	0.79	0.44	4.85	5.18	4.97	0.65	0.54	0.73	436	364	440	113	93	53	551	632	595	80	67	90	-1.89567	2.14194e-15	1.2462e-14	down	-2.8251	3.4447e-74	4.02432e-73	down	-2.13995	1.58736e-29	1.00494e-28	down	-2.63104	1.21648e-37	1.4411e-36	down	0.67474	1.68569e-08	1.02612e-07	false	-0.202244	0.511269	0.649854	false	1A
TraesCS1A02G427000	6.56	5.54	6.11	7.5	8.22	7.13	3.42	3.86	4.3	5.82	5.76	6.33	570	456	512	649	668	587	268	325	354	491	489	539	0.674956	1.72987e-06	5.16042e-06	false	0.76512	9.59962e-10	2.53822e-09	false	0.230133	0.0696895	0.090182	false	1.15953	1.8663e-16	9.23226e-16	up	-0.545251	6.19436e-05	0.000239968	false	-0.403232	0.000976904	0.00349633	false	1A
TraesCS1A02G427200	3.99	3.38	2.98	0.59	1.16	0.97	4.78	6.01	6.22	0.95	1.14	0.79	264	212	190	39	72	61	285	385	390	61	74	51	-1.58488	7.59062e-09	2.78474e-08	down	-2.4252	2.67431e-34	1.67186e-33	down	-1.59047	2.75678e-11	7.66445e-11	down	-2.46961	6.11678e-26	4.88964e-25	down	0.824454	4.89932e-07	2.54628e-06	false	0.0346717	0.91869	0.951133	false	1A
TraesCS1A02G427300	4.47	4.75	3.98	1.39	2.05	1.37	1.07	1.2	1.33	0.31	0.16	0.35	616	620	528	190	264	179	133	160	174	42	21	47	-1.11398	4.28182e-10	1.73328e-09	down	-2.00221	1.68106e-12	5.1781e-12	down	-3.75549	5.06013e-67	6.83562e-66	down	0.589085	0.00559714	0.0092691	false	-1.76333	2.62023e-34	1.01334e-32	down	-2.60178	1.35196e-19	2.60113e-18	down	1A
TraesCS1A02G427400	0.22	0.35	0.33	0.8	0.5	0.47	0.2	0.22	0.4	0.62	0.72	0.59	29	44	42	107	63	60	24	28	51	80	94	78	1.36383	0.000271729	0.000625508	up	1.37642	3.48229e-05	6.77775e-05	up	1.37667	1.83354e-05	3.4964e-05	up	1.31307	0.000740719	0.00137619	up	-0.0110805	0.978287	0.9856	false	0.0568158	0.849654	0.907274	false	1A
TraesCS1A02G427500	2.55	3.22	2.72	0.97	0.91	0.59	2.85	3.14	3.37	3.02	3.34	2.86	179	214	184	68	60	39	180	213	224	206	229	197	-1.42524	1.99981e-07	6.52053e-07	down	0.118007	0.472564	0.523472	false	0.37791	0.0377143	0.0508255	false	-1.73539	8.53468e-12	3.10755e-11	down	0.249214	0.148585	0.237965	false	1.84499	5.22217e-14	6.09483e-13	up	1A
TraesCS1A02G428100	3.63	3.01	3.21	1.64	1.94	1.15	3.93	2.29	3.71	1.12	1.18	1.11	120	94	102	54	60	36	117	73	116	36	38	36	-0.710109	0.0249132	0.0408073	false	-1.39927	5.15899e-06	1.07162e-05	down	-1.27377	2.39667e-05	4.52264e-05	down	-0.885825	0.00648004	0.0106272	false	0.114839	0.646402	0.741598	false	-0.522602	0.158236	0.274368	false	1A
TraesCS1A02G428200	3.81	4.03	5.03	1.07	2.52	2.15	3.95	4.08	4.26	1.33	1.95	1.88	118	118	150	33	73	63	110	122	125	40	59	57	-0.827249	0.0108985	0.0192468	false	-1.11276	1.90468e-05	3.78839e-05	down	-1.06207	0.000151448	0.000266813	down	-0.92761	0.00270914	0.0046883	false	0.0405774	0.848225	0.895502	false	-0.195781	0.596543	0.721549	false	1A
[truncated: 36,513 more rows]
[truncated: 16 more columns]

## Sheet: Numbers of DEGs
The numbers of DEGs
group	total	down	up
Liangxing66-CK_vs_Liangxing66-D	20663	8635	12028
Liangxing66-CK_vs_Ziyou5-CK	9906	3772	6134
Liangxing66-D_vs_Ziyou5-D	10027	5465	4562
[truncated: 1 more rows]

## Sheet: 734 DEGs
The 734 DEGs that cover 4 different combinations
[truncated: 735 more rows]

[truncated: 4 more sheets: liangxing66 GO CLASSIFICATION, ZIYOU 5 GO classification, liangxing 66 pathway enrichment, ziyou 5 pathway enrichment]
