# Supplementary material for: Comparative transcriptomic analysis and functional characterization reveals that the class III peroxidase gene TaPRX-2A regulates drought stress tolerance in transgenic wheat
Source: Front Plant Sci. 2023 Feb 15;14:1119162. doi: 10.3389/fpls.2023.1119162 (PMC9976582; doi:10.3389/fpls.2023.1119162)
Supplement: Supplementary Table 2 — DEGs involved in flavonoid biosynthesis pathway, phytohormones, and phenolamides and antioxidant biosynthesis pathways. [file Table2.xlsx]

## Sheet: flavonoid biosynthesis
DEGs involved in flavonoid biosynthesis pathway
NAME	Liangxing66-CK_vs_Liangxing66-D	Fold change		NAME	Ziyou5-CK_vs_Ziyou5	Fold change
PAL	TraesCS2D02G377600	1.66918413826561		PAL	TraesCS2D02G377600	2.57570967989244
	TraesCS1A02G037800	6.13423234997736			TraesCS1A02G037800	4.5005484060095
	TraesCS2D02G377500	2.31261525533607			TraesCS1B02G122800	4.27738099288403
	TraesCS2D02G377400	3.61471492195387			TraesCS2D02G377500	3.56268960090141
	TraesCS2B02G398400	2.56739683901893			TraesCS1D02G039300	1.85201979907373
	TraesCS2B02G398200	3.87740251992162			TraesCS2D02G218700	1.23387405728051
	TraesCS2A02G380900	3.14133927520261			TraesCS2D02G377400	5.54543440424156
	TraesCS2B02G398300	2.45014200303849			TraesCS2B02G398400	3.35672953720948
	TraesCS2A02G380800	1.57297543503924			TraesCS2B02G398200	5.56396502262449
	TraesCS6B02G258600	3.62365653108937			TraesCS2A02G196700	2.1713925351217
	TraesCS2A02G381100	2.56664822636009			TraesCS2A02G380900	3.89475249616232
	TraesCS2A02G381000	4.20367752373363			TraesCS2D02G377200	1.30408708740423
	TraesCS6B02G258500	3.90382579304784			TraesCS1B02G048300	2.69917768702083
	TraesCS6A02G222800	3.36184692441255			TraesCS5B02G468300	1.00482378020799
	TraesCS6D02G212400	3.71721352012786			TraesCS2B02G398300	3.58595638818866
	TraesCS4A02G401300	2.10025877634235			TraesCS2B02G224000	5.0224440864867
PTAL	TraesCS6B02G258400	5.16295840196394			TraesCS2A02G380800	2.94086899020727
	TraesCS6A02G222900	4.77984509004275			TraesCS2D02G204700	2.38339992491179
	TraesCS6D02G212200	4.94080406399801			TraesCS6B02G258600	3.42423756148779
CYP73A	TraesCS3A02G136100	4.13791556619127			TraesCS2A02G381100	2.8845549066254
	TraesCS3B02G154000	3.91351658814643			TraesCS1B02G048500	2.76396083452302
	TraesCS3A02G342900	1.68662479607416			TraesCS2A02G381000	5.72644815261752
	TraesCS3D02G136900	3.23782801845717			TraesCS6B02G258500	3.74972477954813
	TraesCS3D02G336900	4.06474025000436			TraesCS6A02G222800	3.83493142248308
	TraesCS3B02G375100	6.43837850878104			TraesCS6D02G212400	3.65676288836459
COMT	TraesCS6A02G405200	2.1216283275724			TraesCS1A02G094900	7.39411738332528
	novel.4293	-1.04496982976795			TraesCS1D02G103500	5.37445934562664
F5H	TraesCS1B02G202400	1.2964060476887			TraesCS6A02G222700	3.51683094613754
	TraesCS7A02G373000	1.98388727529673		PTAL	TraesCS6B02G258400	4.54207577898785
	TraesCS1A02G177800	3.02508727029295			TraesCS6A02G222900	3.98014056956808
	TraesCS1D02G176400	1.72574849152533			TraesCS6D02G212200	4.19576550717673
4CL	TraesCS2A02G145800	7.75945479740483		CYP73A	TraesCS3A02G136100	3.79857036058456
	TraesCS4A02G036200	1.19361550957911			TraesCS3B02G154000	3.45323963167472
	TraesCS4B02G269100	2.80802358612885			TraesCS3A02G342900	1.21223046597314
	TraesCS6B02G294100	1.74038979612311			TraesCS3D02G136900	3.35070665761046
	TraesCS7D02G483400	2.76027964060622			TraesCS3D02G336900	3.68147983750451
	TraesCS7B02G401100	3.26613270297112			TraesCS2D02G300200	5.31778123807831
	TraesCS7B02G401000	2.90392773954393			TraesCS3B02G375100	5.69077620633316
	TraesCS6A02G151700	1.8262854273706		COMT	TraesCS6B02G449400	-2.59052166770413
	TraesCS6B02G179900	2.1381145945397			TraesCS6D02G388700	-1.48709996115574
	TraesCS6A02G266700	5.24260364536222		F5H	TraesCS1A02G177800	1.3306657704312
	TraesCS3A02G394300	1.66296585739961		4CL	TraesCS2A02G145800	5.12662774012103
	TraesCS2D02G150400	7.04837498125622			TraesCS4A02G036200	1.50811057872122
	TraesCS4D02G268400	6.64156711126308			TraesCS4B02G269100	2.03272988812906
	TraesCS3D02G388100	1.61492150915477			TraesCS6B02G294100	1.99963045588844
	TraesCS4A02G239000	3.08670291267579			TraesCS7D02G483400	2.36700451462713
	TraesCS7A02G496200	4.85768386215837			TraesCS7B02G401100	2.83391109461207
	TraesCS2B02G171200	5.11406185206345			TraesCS7B02G401000	2.20933158951656
	TraesCS4B02G269200	2.22582347509369			TraesCS6A02G151700	2.17592373242246
	TraesCS4D02G074500	1.096470332346			TraesCS3A02G394200	1.95965312137534
	TraesCS6D02G141700	3.19452924723761			TraesCS6B02G179900	2.05828635989372
	TraesCS3B02G426200	-2.19854128556991			TraesCS6A02G266700	3.02696487826129
	TraesCS3D02G388000	-1.04461534293357			TraesCS3A02G394300	1.12492302296133
CMT	TraesCS7A02G127600	2.02406490626806			TraesCS2D02G150400	5.26949992720218
HCT	TraesCS5D02G230700	11.7426709402857			TraesCS4D02G268400	3.90181949868471
	TraesCS1B02G107500	8.45894026399042			TraesCS3D02G388100	1.38424970909585
	TraesCS7A02G106000	7.4499001469028			TraesCS7A02G496200	4.15286907259588
	TraesCSU02G235600	1.84548968321634			TraesCS2B02G171200	3.76807637976413
	TraesCS5D02G342800	9.57998947928813			TraesCS4B02G269200	1.64958382515964
	TraesCS1D02G089600	9.94251823066156			TraesCS6D02G141700	2.96929118983342
	TraesCSU02G078700	1.33706452705899			TraesCS3B02G426200	-2.66437602711808
	TraesCS2D02G424100	1.74008054245618			TraesCS3D02G388000	-1.1148667161041
	TraesCS5B02G221700	2.90067787097473		CMT	TraesCS7B02G027200	1.08783983728814
	TraesCS1B02G107300	8.88760294846595			TraesCS7A02G127600	1.85693317146206
	TraesCS4D02G359800	5.99317728552179			TraesCS7A02G068600	-1.31277589239916
	TraesCS1B02G107400	9.77450077460518		HCT	TraesCS5D02G230700	4.2740017948631
	TraesCS2D02G527800	2.92923520074194			TraesCS1B02G107500	8.89180212455201
	TraesCS5D02G342100	10.2185860318539			TraesCS7A02G106000	6.45656240986801
	TraesCS7B02G004800	3.72967777510987			TraesCS5D02G342800	6.44817780636806
	TraesCS7D02G100300	6.72797657960704			TraesCS1D02G089600	5.43967074759684
	TraesCS6B02G322500	4.23176467883755			TraesCSU02G078700	1.55920418342339
	TraesCS5B02G336300	10.6276156690748			TraesCS1B02G107300	9.27138924188608
	TraesCS5A02G222700	2.43683999117088			TraesCS4D02G359800	2.96624775069898
	TraesCS5A02G337500	8.52515152475984			TraesCS1B02G107400	9.88981960065928
	TraesCS1D02G089900	11.9585632103795			TraesCS5D02G342100	7.155247139806
	TraesCS3D02G525000	1.05014438378977			TraesCS5A02G222900	4.20185034046763
	TraesCS6B02G281900	3.47248230236879			TraesCS7B02G004800	3.3660170928715
	TraesCS5B02G222000	11.1160343952618			TraesCS7D02G100300	4.60239603763852
	TraesCS6A02G242600	1.55895021959108			TraesCS6B02G322500	2.01712301708796
	TraesCS1A02G088300	10.2697102873102			TraesCS6D02G273300	4.93831037240314
	TraesCS6A02G260900	10.1852185134962			TraesCS5B02G336300	6.32303070757087
	TraesCS2B02G446300	2.3404187074832			TraesCS5A02G222700	1.62000147736661
	TraesCS2A02G426000	5.62442165193561			TraesCS5A02G337500	7.99726212842343
	TraesCS5A02G338600	6.5934339785344			TraesCS1D02G089900	6.25760784140045
	TraesCS5D02G342700	8.85982553068793			TraesCS3D02G525000	1.63766445794902
	TraesCSU02G166000	6.09925582132987			TraesCS6B02G281900	4.16935687740165
	TraesCSU02G078600	1.77066276114568			TraesCS5B02G222000	6.95225139750827
	TraesCS6D02G224600	1.06094274483651			TraesCS1A02G088300	8.48258945158366
	novel.3225	3.30593533102558			TraesCS6A02G260900	9.15730877748788
	novel.3226	4.70686040556562			TraesCS2B02G446300	1.26043997247483
	TraesCS6D02G025800	-1.49660214366225			TraesCSU02G079000	7.26067753806528
	TraesCS7D02G524200	-3.12210700444844			TraesCS5A02G338600	7.96281327892046
	TraesCS7A02G537300	-1.69933593829912			TraesCS5D02G342700	8.58250377793029
	TraesCS4A02G403400	-1.59474706102677			TraesCSU02G166000	3.40169749173206
CYP98A	TraesCS1D02G310000	1.14662892484214			TraesCSU02G078600	2.07906662530203
	TraesCS1A02G310500	2.0372708004954			TraesCS5B02G461000	-2.16901718509288
	TraesCS1B02G321800	1.43180025500162			TraesCS7B02G054100	-1.37451944734575
CSE	TraesCS5A02G292100	1.73231316230593			TraesCS6D02G025800	-1.84674973164729
	TraesCS5B02G291500	1.62507517679392			TraesCS7D02G524200	-3.38437149281475
	TraesCS1B02G243700	3.14287614713242			TraesCS7A02G537300	-3.9405596785427
	TraesCS5D02G299500	2.24580001497238			TraesCS2D02G201100	-2.97861515339894
	TraesCS1A02G230500	4.94670082103625			TraesCS4A02G403400	-3.03892336775639
	TraesCS1D02G231500	5.23361369849053		CYP98A	TraesCS1D02G310000	1.22047321859862
	TraesCS3A02G263400	-1.78796763643187			TraesCS1A02G310500	1.75797031026052
CCR	TraesCS5B02G223700	1.996230186325			TraesCS1B02G321800	1.18070182878548
	TraesCS7A02G396600	2.54540433714156			TraesCS3D02G325300	-1.4324061560017
	TraesCS7B02G298300	1.24033298025652			TraesCS3B02G361900	-1.05520062269474
	TraesCS1A02G194900	2.26779734081038		CSE	TraesCS5A02G292100	1.96005757774246
	TraesCS5A02G225100	2.96585527246853			TraesCS5B02G291500	1.73994776688007
	TraesCS5D02G276600	1.75923713849034			TraesCS1B02G243700	1.87586275974134
	TraesCS1D02G198500	1.93188699542244			TraesCS5D02G299500	2.55278130380479
	TraesCS7D02G391900	2.76015562546527			TraesCS1A02G230500	3.46415025564198
	TraesCS5A02G165800	1.34373622349371			TraesCS1D02G231500	4.0537399690113
	TraesCS1B02G209700	2.84945540607975			TraesCS3A02G263400	-1.38303360843278
	TraesCS6A02G381700	8.83271201591946			TraesCS3D02G263200	-1.22482342672067
	TraesCS7B02G298900	9.79436167082529		CCR	TraesCS5B02G547200	1.47210104417328
	TraesCS3A02G229700	2.26505459000276			TraesCS7A02G396600	1.70326886738917
	TraesCS5B02G162400	1.32187468400294			TraesCS7B02G298300	1.24730186125919
	TraesCS7D02G391700	7.53216575147284			TraesCS1A02G194900	1.4195218320356
	TraesCS3D02G221200	1.21097621165068			TraesCS6D02G366400	7.09873806002229
	TraesCS5B02G546700	1.9346202102247			TraesCS5A02G225100	1.13412384881924
	TraesCS5B02G414300	3.26362018523177			TraesCS5D02G276600	1.25049929176143
	TraesCS7B02G298100	2.8514002034295			TraesCS1D02G198500	1.47709758326114
	TraesCS5B02G269500	2.82496171161051			TraesCS7D02G391900	2.9550231179405
	TraesCS4A02G331600	2.19913668520981			TraesCS5A02G165800	1.47073054242147
	TraesCS7B02G297700	2.04482713870624			TraesCS1B02G209700	2.08156956162687
	TraesCS3D02G342200	1.38888850976657			TraesCS6A02G381700	10.0291376901897
	TraesCS5D02G232400	3.3581429286798			TraesCS7B02G298900	10.1726664190841
	TraesCS7D02G391400	1.09699629791388			TraesCS3A02G229700	1.46941437801288
	TraesCS7A02G396200	-2.44588083089243			TraesCS7B02G052700	4.13833247589063
	TraesCS5D02G277200	-1.78656332176825			TraesCS4A02G331900	1.54730778897072
	TraesCS5B02G269400	-1.93730332576458			TraesCS5D02G541100	1.59436283345584
	TraesCS5A02G473600	-1.44529744363143			TraesCS5B02G162400	1.55346574004218
	TraesCS5A02G268400	-2.71694386932953			TraesCS7D02G391700	6.77115612559393
	TraesCS5D02G276200	-3.47518732582925			TraesCS5B02G546700	3.14049392202523
	TraesCS5D02G486300	-1.06179557649865			TraesCS7B02G298100	2.96839998655233
	TraesCS5B02G268700	-2.29623062324723			TraesCS5B02G269500	2.97436313682521
	TraesCS1D02G425400	-1.25726148215061			TraesCS4A02G331600	3.63423462916115
	TraesCS3A02G348600	-1.81202927200474			TraesCS5D02G232400	1.10999318133156
	TraesCS4D02G135000	-2.07512525215438			TraesCS7A02G396200	-3.18578720745813
	TraesCS5B02G268300	-1.9378725706161			TraesCS7B02G298200	-3.74969194369911
	TraesCS4B02G140300	-1.88396041619744			TraesCS7D02G392100	-1.30842231788093
	TraesCS5B02G486500	-1.22495686860776			TraesCS5D02G277200	-2.73319046935019
	TraesCS5A02G268800	-2.90284867661961			TraesCS5B02G269400	-2.48229820389584
	TraesCS5B02G268200	-3.24699693292681			TraesCS5A02G473600	-2.57401991751001
	TraesCS4D02G343400	-1.52463426437482			TraesCS5D02G071200	-1.10105668787435
	TraesCS5A02G268200	-4.14211170843872			TraesCS5A02G268400	-2.2331480557303
	TraesCS6D02G136600	-1.44793098127738			TraesCS5D02G276200	-8.28533734825841
	TraesCS4A02G177500	-2.00732587455808			TraesCS5D02G486300	-1.61018457229214
	TraesCS5A02G269100	-1.33059457553314			TraesCS5B02G268700	-2.98913433433875
	TraesCS3B02G380500	-2.27309545007039			TraesCS1D02G425400	-2.84587222882597
	TraesCS6B02G175600	-1.02644398504473			TraesCS5A02G517000	-1.86555877390799
	TraesCS5A02G268700	-1.08602145265521			TraesCS4D02G135000	-3.82160283314392
	novel.10603	-1.95409501066128			TraesCS5B02G268300	-1.45689469499004
REF1	TraesCS3A02G212300	10.7804889570955			TraesCS4B02G140300	-3.61031525437059,
	TraesCS3A02G417200	1.09534392235486			TraesCS5B02G486500	-2.73490822304672
	TraesCS7D02G353900	6.19965879517835			TraesCS5A02G268800	-2.61137706917206
	TraesCS7A02G369400	4.59456536666083			TraesCS5B02G268200	-4.87994586775578
	TraesCS1D02G310100	-1.363922921483			TraesCS4D02G343400	-1.93348263411257
	TraesCS7B02G259200	-6.18809893318406			TraesCS6A02G147300	-1.24428714562776
	TraesCS1A02G310600	-2.55344900257189			TraesCS5A02G268200	-6.03871747806418
CAD	TraesCS5B02G202700	1.79212153598305			TraesCS6D02G136600	-2.22143204349557
	TraesCS5D02G218100	1.99476531591544			TraesCS4A02G177500	-3.97348091450344,
	TraesCS6B02G201600	2.72722617307974			TraesCS5A02G269100	-1.73471738642532
	TraesCS6A02G173700	3.21402163402008			TraesCS3B02G380500	-2.73652081268364
	TraesCS5D02G210600	8.02564311104983			TraesCS6B02G175600	-1.23677305011565
	TraesCS6D02G162800	4.18621002261606			TraesCS5A02G268700	-1.68408097764138
	TraesCS4A02G081300	3.21813083821004			novel.10603	-3.26049727100162
	TraesCS7B02G273600	7.06615696830486		REF1	TraesCS3A02G212300	11.1368647973701
	TraesCS7A02G354000	11.9682925321912			TraesCS3A02G417200	1.02754328516943
	TraesCS1D02G433600	6.9093866684612			TraesCS7D02G353900	3.40728312687879
	TraesCS7D02G368700	8.39226739277275			TraesCS7A02G369400	3.64966833992879
	TraesCS1B02G456900	7.78382093799167			TraesCS1D02G310100	-2.13925575100797
	TraesCS4D02G223000	1.91449038135863			TraesCS3B02G452100	-1.62152638516788
	TraesCS7D02G393900	2.50491047160264			TraesCS1B02G321900	-1.31741233474292
	TraesCS7B02G300200	1.20169990507969			TraesCS7B02G259200	-3.47049057510148
	TraesCS7A02G400100	1.92161114862418		CAD	TraesCS5B02G202700	1.1083227760789
	TraesCS1A02G424100	10.9075728947106			TraesCS5D02G218100	1.43235119369094
	novel.16234	1.1142837595566			TraesCS6B02G406200	1.26279860586325
	TraesCS7B02G232400	-1.86392982826934			TraesCS6B02G201600	2.97351459206245
	TraesCS5B02G209800	-1.16648948545333			TraesCS6A02G173700	2.48132257965242
	TraesCS6A02G369800	-2.96908922461194			TraesCS5D02G210600	6.07510308552065
	TraesCS7A02G350500	-1.85953905677045			TraesCS6D02G162800	3.79732448001634
	TraesCS2D02G064900	-2.21414084451087			TraesCS4A02G081300	3.0210926431715
	TraesCS6D02G353300	-2.24595420538005			TraesCS7B02G273600	6.25375460347199
	TraesCS6B02G406000	-1.01425572251372			TraesCS7A02G354000	7.27016409073412
	TraesCS5A02G213900	-2.30327914904301			TraesCS1D02G433600	6.96885586507714
CHS	TraesCS2B02G558400	1.28420568837115			TraesCS7D02G368700	6.42747514163551
	TraesCS2D02G530600	1.83847331224729			TraesCS1B02G456900	5.76510530618054
	TraesCS2A02G527700	1.80497285433389			TraesCS4D02G223000	1.55633103077252
	TraesCS2B02G038600	-4.01662122030254			TraesCS7D02G393900	1.48733996481191
	TraesCS2D02G034500	-1.30143667811605			TraesCS7B02G300200	1.16686397411149
	TraesCS2D02G027700	-2.57402575056317			TraesCS1A02G424100	9.64619414869966
DFR	TraesCS3B02G257900	5.2426145076365			TraesCS2B02G078700	-1.96825364314944
	TraesCS3D02G224600	2.17555344898801			TraesCS7B02G232400	-1.44320530036133
ANS	TraesCS6B02G309800	3.69001248028972			TraesCS5B02G202800	-1.03944636863648
	TraesCS6D02G261300	3.7436900191817			TraesCS5B02G209800	-1.35202074029145
	TraesCS6A02G281000	3.39538117596524			TraesCS6A02G369800	-1.8664395904785
	TraesCS6D02G004300	-2.35979652951575			TraesCS5A02G205600	-2.12815445962442
ANR	TraesCS2D02G185400	1.04228762663039			TraesCS7A02G350500	-3.32005333561344
	TraesCS7A02G505300	2.35777212986262			TraesCS2D02G064900	-2.8455199699434
	TraesCS2D02G185600	2.4039117882016			TraesCS6D02G353300	-1.96937361265313
	TraesCS2A02G177200	1.94099177993768			TraesCS5D02G210700	-1.29831331502023
	TraesCS2A02G177500	7.93627568399078			TraesCS6B02G406000	-1.37697346385139
	TraesCS2B02G204600	3.68318077461126			TraesCS5A02G213900	-2.32414268060407
	novel.7096	1.45505912752385		CHS	TraesCS2B02G038700	1.72315979539213
	TraesCS2B02G508400	-3.5788406761071			TraesCS2A02G025700	1.50052906244215
	TraesCS2A02G481700	-1.4819149242519			TraesCS2B02G038600	-4.20130305623672
	TraesCS2D02G481700	-1.30896548751023			TraesCS2A02G025500	-2.33211629357643
	TraesCS2B02G055100	-5.83672163176521			TraesCS2D02G027700	-8.33550703595759
	TraesCS2B02G508000	-2.14209811825913		DFR	TraesCS3A02G226600	3.75559108041837
	TraesCS2A02G481400	-1.51753177949057			TraesCS3B02G257900	5.97555540257874
	TraesCS2B02G507700	-1.17404805406473			TraesCS3D02G224600	4.84863214011882
	TraesCS2B02G508300	-2.03911941070257		F3H	TraesCS2D02G493400	4.93904137426918
CHI	TraesCS2B02G122400	1.82331388629062			TraesCS2A02G493500	5.65466501826327
	TraesCS4B02G121300	2.69982571653954			TraesCS2B02G521500	5.66639456734501
	TraesCS7B02G069500	2.60719935867781		ANS	TraesCS6B02G309800	3.48972196009644
	TraesCS4B02G170000	1.48091307391001			TraesCS6D02G261300	3.6909408424281
	TraesCS5B02G145800	1.21461058351982			TraesCS6A02G041800	3.71743490726021
	TraesCS2D02G105100	2.28443926255489			TraesCS6A02G001500	2.65613756776322
	TraesCS5B02G488900	1.22510622928181			TraesCS6B02G006200	4.22350986668391
	TraesCS5A02G475600	1.56620335428923			TraesCS6A02G281000	3.21052234784448
	TraesCS4A02G193900	2.28486540891332			TraesCS6D02G004300	4.00910643599338
	TraesCS5D02G145500	1.6769549016807		ANR	TraesCS7A02G505300	2.52812642126051
	TraesCS7B02G038200	3.70036731510013			TraesCS2D02G481600	7.85980370333313
	TraesCS4D02G119400	2.52627791689236			TraesCS2A02G177200	1.51428099364737
	TraesCS7D02G471300	1.39913663120886			TraesCS2A02G177500	5.72824733836034
	TraesCS5A02G146900	1.0198365837672			TraesCS2B02G204600	2.33970830350806
	TraesCS4D02G172100	1.22199819300066			TraesCS2B02G508400	-4.22111518392572
	TraesCS5B02G145700	1.59425472243725			TraesCS2D02G482200	-5.37337858985396
	TraesCS5A02G146800	1.76653806468137			TraesCS2D02G481700	-1.02890609237803
	novel.7476	1.76418125551391			TraesCS2D02G482000	-2.50916394706086
	novel.4462	1.05508564864163			TraesCS2D02G481500	-3.57880786433451
	TraesCS2B02G446100	-3.44569257659985			TraesCS2D02G482100	-1.5654115951924
	TraesCS5D02G061200	-3.01847299571409			TraesCS2B02G055100	-8.12061546337105
	TraesCS6A02G310600	-1.11279874640904			TraesCS2B02G508000	-2.60763112880343
	TraesCS1D02G037900	-1.15802317277638			TraesCS2A02G481400	-2.73354356933449
	TraesCS2A02G425800	-1.3411			TraesCS2B02G507700	-2.0398133287948
FLS	TraesCS4A02G320100	1.57212991919591			TraesCS2B02G508300	-2.31312766951506
	TraesCS4D02G195700	2.9133551351621		CHI	TraesCS4B02G121300	1.64509628343927
	TraesCS7A02G121400	1.85301430326166			TraesCS7B02G069500	2.23336575477219
	TraesCS4B02G195000	5.88095807043691			TraesCS4B02G170000	1.43382260539097
	TraesCS4A02G109200	3.0499551322642			TraesCS5B02G145800	1.40192444216658
	novel.14899	4.01673246883167			TraesCS7A02G483700	1.09891110263982
	novel.16794	7.78617796086312			TraesCS2D02G105100	2.55395146755837
	TraesCS7B02G041600	-3.50345149865779			TraesCS4A02G193900	1.33440432995346
CYP75B1	TraesCS1A02G442300	1.32866896965243			TraesCS5D02G145500	1.87403065168554
	TraesCS7B02G310900	2.0690323658442			TraesCS4D02G119400	1.50902092080996
	TraesCS1B02G476400	1.34552154315624			TraesCS5D02G145400	1.53255322239393
	TraesCS7A02G411700	1.47451479265277			TraesCS5A02G146900	1.29026754232292
	TraesCS7D02G404900	5.6017625866446			TraesCS4D02G172100	1.09036775346229
DFR	TraesCS3B02G257900	5.2426145076365			TraesCS5B02G145700	1.70350186335794
	TraesCS3D02G224600	2.17555344898801			TraesCS5A02G146800	1.53547308502919
					novel.7476	1.03319629390036
C12RT1	TraesCS2A02G113700	3.47609221674001			TraesCS1A02G036200	-1.95387466607197
	TraesCS2B02G132400	13.2644553038694			TraesCS2B02G446100	-3.28058105514731
	TraesCS2A02G113500	12.7711213785285			TraesCS1B02G046200	-1.76879733216384
	TraesCS2B02G132500	10.2463898511344			TraesCS6A02G310600	-1.45125607046014
	TraesCS2B02G132700	11.8812930478497			TraesCS1D02G037900	-2.40390924439048
	TraesCS2B02G132100	13.6627476259476			TraesCS2A02G425800	-2.04469078822023
	TraesCS2D02G114100	10.7694562086495			TraesCS2D02G423700	-2.1936322572337
	TraesCS2D02G114300	9.43095059049536		FLS	TraesCS4A02G320100	1.80330731362926
CYP75A	novel.8926	-1.06527629339335			TraesCS7A02G121400	1.87857407117576
	novel.2744	-1.10417765113787			TraesCS4B02G195000	1.88077909782213
	novel.2985	-1.66106403425714			TraesCS7B02G020000	1.03827603029916
	novel.4162	-1.53053132986788		F3H	TraesCS2D02G493400	4.93904137426918
	novel.603	-1.25994397885799			TraesCS2A02G493500	5.65466501826327
CYP75B1	TraesCS1A02G442300	1.32866896965243			TraesCS2B02G521500	5.66639456734501
	TraesCS7B02G310900	2.0690323658442		CYP75B1	TraesCS1A02G442300	2.3233036038619
	TraesCS1B02G476400	1.34552154315624			TraesCS7B02G310900	1.02367058376701
	TraesCS7A02G411700	1.47451479265277			TraesCS1D02G450100	1.59491955103322
	TraesCS7D02G404900	5.6017625866446			TraesCS1B02G476400	2.78934327268509
FLS	TraesCS4A02G320100	1.57212991919591			TraesCS7D02G404900	2.57158846670228
	TraesCS4D02G195700	2.9133551351621		DFR	TraesCS3A02G226600	3.75559108041837
	TraesCS7A02G121400	1.85301430326166			TraesCS3B02G257900	5.97555540257874
	TraesCS4B02G195000	5.88095807043691			TraesCS3D02G224600	4.84863214011882
	TraesCS4A02G109200	3.0499551322642
	novel.14899	4.01673246883167		C12RT1	TraesCS2A02G113700	3.8209823639147
	novel.16794	7.78617796086312			TraesCS2B02G132400	11.6774741692528
	TraesCS7B02G041600	-3.50345149865779			TraesCS2A02G113500	12.3955800105115
HIDH	TraesCS6B02G047900	4.65250916501321			TraesCS2B02G132500	10.4540920006024
	TraesCS2B02G526100	3.70536845129183			TraesCS2B02G132600	8.18519841930846
	TraesCS5D02G444200	1.54076785013804			TraesCS2B02G132700	11.9472823328377
	TraesCS5A02G437300	2.06187906180263			TraesCS2B02G132100	13.7621008341005
	TraesCS5D02G417100	1.8229018299464			TraesCS2D02G114100	9.77970142826612
	TraesCS5A02G407200	1.07864044896018			TraesCS2D02G114300	9.44217498143415
	TraesCS6B02G046900	2.24879402433438		CYP75A	TraesCS5A02G518800	-1.49970331980753
	TraesCS5B02G412100	2.28437889291855			novel.8926	-1.09855258862803
	novel.12109	3.27119939881677			novel.2744	-1.83564592161665
	TraesCS5B02G239700	-1.78479919321199			novel.2985	-2.64204265333485
	TraesCS5B02G241000	-1.27028393529314			novel.4162	-2.04004174217548
	TraesCS5D02G247700	-2.92500213443516		CYP75B1	TraesCS1A02G442300	2.3233036038619
	TraesCS5A02G241900	-1.20624396216255			TraesCS7B02G310900	1.02367058376701
CYP81E	TraesCS5B02G403000	1.5366483829725			TraesCS1D02G450100	1.59491955103322
	TraesCS2A02G534600	4.50427672596606			TraesCS1B02G476400	2.78934327268509
	TraesCS5B02G403100	1.34971233763071			TraesCS7D02G404900	2.57158846670228
	TraesCS2A02G262800	2.82992075083674		HIDH	TraesCS6B02G047900	1.77137004529796
	TraesCS5B02G402900	-2.38111272267071			TraesCS5D02G444200	2.00673646285386
UGT73C6	TraesCS2D02G374500	3.17230428072365			TraesCS5A02G437300	2.27933335821085
	TraesCS3D02G126500	2.32748439606233			TraesCS5B02G439900	1.40402450391245
	TraesCS3B02G144400	3.08354610658274			TraesCS5B02G412100	1.07404034450991
	TraesCS3A02G124800	1.93297549523709			novel.12109	3.00676871668163
	TraesCS3B02G144800	1.69419358446638			TraesCS5D02G435500	-1.21949599662529
	TraesCS3B02G144900	2.52419743530333			TraesCS5B02G239700	-4.0177110919406
	TraesCS2A02G378200	1.15174282980896			TraesCS5B02G241000	-1.82491899803192
	TraesCS2B02G395100	1.59779415308368			TraesCS5D02G247700	-5.05749635546942
	TraesCS2B02G395000	6.02712270444726			TraesCS5B02G240600	-2.24130277818012
	TraesCS3A02G125200	1.85822166812217			TraesCS5D02G249100	-1.97628748851617
	TraesCS3A02G124700	1.92777574885633			TraesCS1A02G257500	-1.06494663985598
	TraesCS3D02G126300	3.21779591413449			TraesCS1B02G268000	-1.40188997026532
PRX	TraesCS3A02G297100	8.68599812116977			TraesCS5B02G240400	-1.39730214410974
	TraesCS4D02G342600	2.43051081103545			TraesCS5A02G241900	-2.58729063458799
	TraesCS3B02G354000	3.208631845479			TraesCS1A02G257000	-2.66162080744371
	TraesCS2D02G583100	2.0385661570992			TraesCS1B02G267600	-1.68998455350379
	TraesCS5D02G439400	1.10007883989515		CYP81E	TraesCS2A02G262800	2.41183514559654
	TraesCS7D02G464600	10.3633150078404			TraesCS5B02G402900	-3.61283204888637
	TraesCS3A02G297200	5.33137452144198			TraesCS5A02G397800	-1.25857414516067
	TraesCS6A02G324200	5.50311571819911		UGT73C6	TraesCS2D02G374500	1.43673255108105
	TraesCS7A02G089700	4.26409181906053			TraesCS2A02G378100	1.64863218379731
	TraesCS1D02G318800	3.25761116546296			TraesCS3D02G126500	2.86791534433476
	TraesCS1D02G080900	4.90185278933106			TraesCS3B02G144400	4.59019022949839
	TraesCS7D02G420500	3.01569094457343			TraesCS3A02G124800	2.25716030757232
	TraesCS4A02G389000	4.7394501981401			TraesCS3B02G144800	2.05596182412913
	TraesCS6B02G354600	6.15709167048689			TraesCS3B02G144900	1.13492467786088
	TraesCS6A02G047400	9.04398464106214			TraesCS3B02G143300	1.28834561015463
	TraesCS4B02G347700	5.9520171163292			TraesCS2B02G395000	4.37031121350997
	TraesCS6B02G063900	3.36756859464953			TraesCS3A02G125200	1.35638296119691
	TraesCS6B02G063500	9.40471641835846			TraesCS3D02G126200	1.35562485437106
	TraesCSU02G103800	1.335271767153			TraesCS3A02G124700	2.94616973956291
	TraesCS7A02G139000	1.26162029297624			TraesCS3D02G126400	6.39397341889017
	TraesCS2D02G081900	6.87153120877271			TraesCS3D02G126300	4.3348900240444
	TraesCS7D02G084900	3.21704402602979		PRX	TraesCS3A02G297100	3.24015285030167
	TraesCS1D02G079800	3.93313227859087			TraesCS4D02G342600	1.98509282280956
	TraesCS1A02G319000	2.189454372757			TraesCS3B02G354000	1.54174051544086
	TraesCS6A02G047500	9.04086761406107			TraesCS2D02G583100	4.42289883388586
	TraesCS3D02G305300	3.84826492456677			TraesCS3B02G209500	1.51366239162246
	TraesCS5D02G364600	7.24724511885293			TraesCS3A02G297200	2.02040847532745
	TraesCS6B02G386700	1.52361201291855			TraesCS6A02G324200	2.04294202834818
	TraesCS2B02G125800	1.40453686657759			TraesCS7A02G089700	2.0877263533815
	TraesCS2B02G098100	2.00679462618456			TraesCS1D02G318800	1.67245773219158
	TraesCS1B02G096900	5.52068942693073			TraesCS7D02G420500	3.88278238167894
	TraesCS7B02G099800	2.32512160425063			TraesCS4A02G389000	2.62671398166723
	TraesCS7A02G428200	3.84365270356489			TraesCS4B02G347700	4.01349527323916
	TraesCS7D02G347300	4.87476416318775			TraesCS7A02G262000	7.47888061582278
	TraesCS1B02G115900	2.37414695022903			TraesCS6B02G063900	1.35403281324037
	TraesCS6D02G303900	4.4383797298286			TraesCS6B02G063500	10.2033684638272
	TraesCS7B02G251100	6.90219314821241			TraesCSU02G103800	1.45983218699498
	TraesCS1A02G124200	2.36837564023155			TraesCS7A02G139000	1.68022040053939
	TraesCS6A02G047300	8.31606677652106			TraesCS2D02G081900	5.9695663684219
	TraesCS3A02G325100	1.82696666187746			TraesCS7D02G084900	1.88052903436832
	TraesCS2D02G583000	3.05956122828798			TraesCS1D02G079800	2.94875434439064
	TraesCS6D02G054500	8.19750959407315			TraesCS1A02G319000	1.17310606869618
	TraesCS3D02G518200	9.17538529196271			TraesCS3D02G305300	1.0422599726709
	TraesCS5A02G516300	2.81565113902306			TraesCS3B02G215500	1.76411519047056
	TraesCS1D02G096400	5.87978849552971			TraesCS6B02G386700	1.37061170325672
	TraesCS7A02G339600	6.0250030534006			TraesCS2B02G098100	2.9362290491546
	TraesCS1A02G077700	1.76428910407334			TraesCS2D02G353000	3.7516348705739
	TraesCS3D02G318500	1.48082611309737			TraesCS7B02G099800	2.20369112705882
	TraesCS7B02G328400	4.23080402771301			TraesCS7A02G428200	2.80692963673009
	TraesCS6D02G054900	6.78909245973206			TraesCS7D02G347300	3.8369224950611
	TraesCS6A02G047600	2.0384380220477			TraesCS7B02G041000	1.11981826785622
	TraesCS1B02G095800	3.07639691003527			TraesCS6D02G303900	2.76474755357604
	TraesCS1B02G331300	3.87726195755141			TraesCS7B02G251100	5.23675424322191
	TraesCS3A02G185900	4.67509172620351			TraesCS3A02G325100	1.83691855497319
	novel.12166	2.06903730416146			TraesCS2D02G583000	2.50634115328361
	TraesCS2D02G154300	8.17893215731595			TraesCS2B02G615800	4.802499954705
	TraesCS2A02G106700	-3.29067446748161			TraesCS3D02G518200	2.04251170402262
	TraesCS6A02G118300	-1.34101878825714			TraesCS5A02G516300	1.35973174586789
	TraesCS2B02G278500	-1.73385388841937			TraesCS2D02G082100	1.02710110798234
	TraesCS7D02G370400	-5.50074066447078			TraesCS1D02G096400	1.98690773584105
	TraesCS5D02G256400	-1.54793369731421			TraesCS7A02G339600	5.23452596362628
	novel.15298	-6.36379002673175			TraesCS1A02G077700	1.10133938151552
	novel.5122	-1.58354083716485			TraesCS7B02G328400	5.07716420478301
					TraesCS6D02G054900	3.56503935871478
					TraesCS5D02G410500	2.71102017858494
					TraesCS1B02G095800	2.16893481130472
					TraesCS1B02G331300	3.55264155674423
					TraesCS3A02G185900	3.76463564957887
					novel.12166	1.91291583605193
					novel.6640	1.32759316501031
					TraesCS2B02G174400	8.13882671464143
					TraesCS2D02G154300	8.43937826298428
					TraesCS7B02G219900	-2.99164227038261
					TraesCS2A02G106700	-3.27302678135689
					TraesCS7D02G315600	-2.21775456628791
					TraesCS7A02G319100	-1.31048735165778
					TraesCS2D02G327700	-1.18997919053855
					TraesCS2B02G278500	-4.3209693821889
					TraesCS7D02G370400	-7.10942366092611
					TraesCS5D02G256400	-1.26127027086452
					TraesCS5D02G450300	-1.51677200969508
					TraesCS2D02G260300	-3.06137936534133
					TraesCS1A02G108400	-3.3302043336611
					TraesCS2B02G346800	-1.08328018175917
					TraesCS1D02G130200	-1.47193455141154
					TraesCS2A02G263500	-2.49031742156922
					TraesCS7B02G342100	-7.07608898339983
					novel.8790	-1.71237778103793
					novel.8791	-1.45218512495149
					novel.9206	-1.06316844479463
					novel.15298	-7.98494451577624
					novel.5122	-1.8768335641627

## Sheet: ABA
DEGs involved in ABA pathway
NAME	Liangxing66-CK_vs_Liangxing66-D	Fold change		NAME	Ziyou5-CK_vs_Ziyou5	Fold change
crtB	TraesCS5D02G365100	2.94701620182414		crtB	TraesCS5D02G365100	2.60986885351894
	TraesCS5B02G358800	12.0931096494491			TraesCS5B02G358800	6.369677480213
	TraesCS7D02G553300	1.31351143740815			TraesCS5A02G356300	4.25628008929551
	TraesCS7A02G557300	1.13099416498306			novel.3457	1.50637574583974
	TraesCS5A02G356300	4.81415882715106			TraesCS5A02G020900	-2.44814863781217
	novel.3457	2.75444022926281			TraesCS5B02G017900	-1.62753226755514
	TraesCS5A02G020900	-1.35335215219048			TraesCS7B02G482000	-3.27801010445417
	novel.14492	-1.17494825991492			TraesCS7D02G553300	-1.29343780263375
crtISO	TraesCS5D02G528500	-1.09936396230993			TraesCS7A02G557300	-2.09502113366008
	TraesCS5B02G529400	-1.05341015380796			TraesCS5D02G026000	-1.63204331975705
	TraesCS1D02G074300	-1.05064493049237			novel.14492	-1.45320321041342
crtL2	TraesCS3A02G208800	1.12484809521096			novel.16599	-2.06257914972048
	TraesCS3D02G211700	1.68965304513202		crtISO	TraesCS1A02G407600	-1.74381172973583
	TraesCS3B02G239100	1.2036131380958			TraesCS5D02G528500	-1.70529379846374
	novel.16798	1.16768368153754			TraesCS5B02G529400	-2.24328336592178
lcyB	TraesCS6D02G161000	2.69843781514048			TraesCSU02G062000	-2.14948151479753
CYP97A3	TraesCS6B02G438800	2.10562165582323			TraesCS5B02G013300	-1.1815248702834
	TraesCS6D02G377900	-1.42754974297394		crtL2	novel.16798	1.21461844041777
	TraesCS6B02G432200	-1.87740857072782			TraesCS3A02G208800	-1.00141030442105
crtZ	TraesCS2D02G393900	2.13010062744668			TraesCS3D02G211700	-1.02470718861694
	TraesCS4D02G314400	4.49254058202259			TraesCS3B02G239100	-1.01462790485802
	TraesCS4B02G318000	1.44763868320867		lcyB	TraesCS6D02G161000	2.9962735226814
	TraesCS2B02G414500	1.51682742787438			TraesCS6A02G171200	-1.33459249102256
	TraesCS2A02G396200	2.61773276887816			TraesCS6B02G199500	-1.00129014964247
	TraesCS5A02G494200	2.39393546993249		CYP97A3	TraesCS6B02G438800	1.03143464528114
crtL1	TraesCS6D02G161000	2.69843781514048			TraesCS6D02G377900	-2.32369993682353
DWARF27	TraesCS7A02G418900	-2.65614658319822			TraesCS6A02G392000	-1.01378804294752
	TraesCS7D02G314600	-1.37151623451042			TraesCS6B02G432200	-2.14851787357193
	TraesCS1B02G092200	-1.13012883648089		crtZ	TraesCS2D02G393900	1.37749459008031
	TraesCS1B02G092300	-1.04523948686554			TraesCS4D02G314400	3.39366599865708
	TraesCS1D02G075900	-1.45004869332886			TraesCS4B02G318000	1.88584104053392
	TraesCS7B02G319100	-3.81319044415367			TraesCS2A02G396200	1.90188678908219
	TraesCS1A02G073000	-1.30711355951721			TraesCS5A02G494200	1.81338057446849
ZEP	TraesCS4B02G270800	1.28117606899455		CYP97C1	TraesCS1D02G210200	-1.38475039440294
	TraesCS4D02G270000	3.46315925206702		crtL1	TraesCS6D02G161000	2.9962735226814
	TraesCS4A02G213300	-1.49329815242722			TraesCS6A02G171200	-1.33459249102256
	TraesCS4B02G270100	-1.44743527215711			TraesCS6B02G199500	-1.00129014964247
	TraesCS4A02G037000	-1.54221193291347		DWARF27	TraesCS7D02G314600	-3.34538485563082
	TraesCS2A02G300800	-2.22043496342971			TraesCS1B02G092200	-1.16649601499538
	TraesCS4D02G099100	-1.14361241363608			TraesCS7A02G317900	-2.2259592547593
	TraesCS2D02G299500	-1.28041623598807			TraesCS1D02G075900	-1.96307843507879
	TraesCS4D02G269400	-6.46875250103314			TraesCS7B02G319100	-3.54720665477314
	TraesCS4D02G122800	-1.20587650386404			TraesCS1A02G073000	-1.53951171563545
	TraesCS4D02G269300	-2.33041182549963			TraesCSU02G097100	-1.16451788566669
	TraesCS4B02G102500	-1.37173533476619		ZEP	TraesCS4B02G270800	1.28321604939136
	novel.9285	-1.52769507686904			TraesCS4D02G270000	3.28194343154788
VDE	TraesCS3D02G247100	-1.33640930116929			TraesCS2B02G335400	-1.36394246757514
	TraesCS3A02G244300	-1.18312549009726			TraesCS4A02G213300	-3.30178492977089
	TraesCS2A02G280500	-1.20616186618922			TraesCS4B02G270100	-2.2510769960967
NCED	TraesCS2A02G250600	8.8499211648519			TraesCS4A02G037000	-2.13989339724383
	TraesCS5B02G375900	7.53553279104969			TraesCS2A02G300800	-2.02778199366883
	TraesCS5D02G383500	6.82281446951453			TraesCS4D02G099100	-2.2341919704301
	TraesCS5D02G038800	7.45967704222744			TraesCS4B02G129700	-2.06279452179084
	TraesCS5B02G029300	6.98927992586389			TraesCS4D02G269400	-4.88760829593766
	TraesCS5A02G374000	7.71104742359508			TraesCS2B02G317000	-3.29583164000008
	novel.10056	5.40977487268166			TraesCS5B02G386000	-1.36847407428041
	TraesCS6D02G251700	-2.60285163734099			TraesCS4D02G122800	-2.2178781441021
	TraesCS6A02G271600	-3.11396355810807			TraesCS4D02G269300	-3.1109973013321
	TraesCS6B02G298700	-1.07610778575063			TraesCS4B02G102500	-2.75829347709688
ABA2	TraesCS5D02G536000	1.05840776409475			novel.9285	-1.60398672884339
	TraesCS2D02G192100	5.81361926513589		VDE	TraesCS3D02G247100	-1.00171221778889
	TraesCS2A02G123000	11.980121826296			TraesCS3A02G244300	-1.63901324922663
	TraesCS4A02G339500	1.30643277869949			TraesCS2B02G297800	-2.21310596810509
	TraesCS5B02G549100	2.10226161272368			TraesCS3B02G275700	-1.19587397418859
AAO3	TraesCS2A02G246300	2.10513135431447			TraesCS2D02G279300	-2.00580146995434
	TraesCS2D02G248700	2.31707589607151			TraesCS2A02G280500	-2.73361538296229
	TraesCS2B02G270600	1.63003707388008		NCED	TraesCS2A02G250600	8.71379893656229
CYP707A	TraesCS1A02G197100	1.54211648416918			TraesCS5B02G375900	6.6933027890364
	TraesCS5B02G236500	2.29407231858452			TraesCS5D02G383500	6.4947560756958
	TraesCS6B02G298500	4.84511163901486			TraesCS5D02G038800	6.35311211314002
	TraesCS6A02G271300	3.31251774158013			TraesCS5B02G029300	5.57682019628399
	TraesCS5A02G238000	3.32697457478736			TraesCS5A02G374000	6.58351865738947
	TraesCS6D02G243800	2.60366395972067			novel.10056	6.03617882409315
	TraesCS5B02G516300	-2.79137503077777			TraesCS6D02G251700	-4.49119103519235
PYR/PYL	TraesCS4A02G114400	-3.54808088767079			TraesCS6A02G271600	-4.43013373896849
	TraesCS4D02G191200	-5.35893433065645			TraesCS6B02G298700	-3.14210263288743
	TraesCS1D02G195300	-1.0809392072595		ABA2	TraesCS2D02G192100	4.44566940493835
	TraesCS4B02G189800	-3.19367778684835			TraesCS5B02G549100	1.49263801062335
	TraesCS2D02G087500	-3.11122283835162			TraesCS2B02G145100	-3.02424341189411
	TraesCS2B02G105300	-2.81480576538468		AAO3	TraesCS2A02G246300	1.34174586229311
PP2C	TraesCS1D02G363500	4.0441347502932			TraesCS2D02G248700	1.60197326143555
	TraesCS3D02G238000	7.58888698218005			TraesCS2B02G270600	1.31690396993832
	TraesCS3D02G355900	3.40397218252446			TraesCS7A02G509200	-1.11303607161767
	TraesCS2A02G000400	8.65295078484964		AOG	TraesCS7A02G295300	-1.77067364165465
	TraesCS4B02G210100	9.04409599120792		CYP707A	TraesCS5B02G236500	1.35297507186662
	TraesCS3B02G266200	7.19685206618443			TraesCS6B02G298500	4.44130759197786
	TraesCS2D02G000300	5.98020523223353			TraesCS6A02G271300	3.11773131005988
	TraesCS5D02G188600	6.90176933744835			TraesCS5A02G238000	2.43563357283371
	TraesCS1A02G358600	4.07851365001966			TraesCS6D02G243800	2.91868315479735
	TraesCS5A02G183600	6.42120327393701		PYR/PYL	TraesCS4A02G114400	-4.30993460483881
	TraesCS3A02G209200	1.95228977483127			TraesCS4D02G191200	-5.56673447843102
	TraesCS4A02G459600	8.82098935320149			TraesCS4B02G189800	-3.89573273883514
	TraesCS1B02G441400	12.7909510445222			TraesCS2A02G089400	-2.17721359653685
	TraesCS3D02G249000	5.04613547699178			TraesCS2D02G087500	-4.03457818027274
	TraesCS1B02G375100	3.67560886346589			TraesCS2B02G105300	-4.4119993869178
	TraesCS3B02G240000	1.69601124165749		PP2C	TraesCS1D02G363500	2.49188309324231
	TraesCS3B02G277900	5.65628898705973			TraesCS3D02G238000	4.77328139815924
	TraesCS4A02G094300	6.5432548402006			TraesCS3D02G355900	1.76486613514291
	TraesCS5B02G182000	7.17924752521168			TraesCS2A02G000400	4.77594415037915
	TraesCS1A02G411200	5.56075159640399			TraesCS4B02G210100	5.83528839036613
	TraesCS2B02G023600	5.9861681423432			TraesCS3B02G266200	4.29248247369368
	TraesCS1D02G419000	9.18085412584587			TraesCS2D02G000300	3.8207856102678
	TraesCS3D02G212100	1.82353811493647			TraesCS5D02G188600	4.81272588554266
	TraesCS4D02G210900	7.74915575408051			TraesCS1A02G358600	2.5138500898022
	TraesCS3A02G249000	5.06484678501511			TraesCS5A02G183600	4.53252065014645
	TraesCS4B02G162100	4.77323590570678			TraesCS3A02G209200	1.56223365088468
	TraesCS3B02G394600	3.62761550945709			TraesCS4A02G459600	8.10842602277924
	TraesCS3A02G237800	6.46341923926472			TraesCS1B02G441400	6.65943331046942
	TraesCS3A02G362200	3.48519216997377			TraesCS3D02G249000	3.31330585836861
	novel.11885	11.1688213239556			TraesCS1B02G375100	2.71678443337155
	novel.4087	11.0978731864368			TraesCS3B02G240000	1.3674595592905
	novel.6788	11.7646220100291			TraesCS3B02G277900	3.61675439049324
	TraesCS1D02G449700	-1.79917954384636			TraesCS4A02G094300	4.15556734992549
	TraesCS1A02G441200	-2.78301452728544			TraesCS5B02G182000	4.93292903538984
	TraesCS1B02G475700	-1.88005937970688			TraesCS1A02G411200	8.19407486545848
	TraesCS7A02G241800	-1.76753425022614			TraesCS2B02G023600	4.8173259437457
SnRK2	TraesCS3D02G374300	2.5070502655229			TraesCS1D02G419000	8.300812969288
	TraesCS2A02G303900	1.13483893153221			TraesCS3D02G212100	1.49736804231678
	TraesCS1A02G215900	8.00773665879653			TraesCS4D02G210900	4.37064936855094
	TraesCS2A02G493800	3.16386979045044			TraesCS3A02G249000	3.64981670242152
	TraesCS1D02G271000	2.51338512391516			TraesCS3B02G394600	1.68521580791006
	TraesCS1B02G229400	8.29987753169428			TraesCS3A02G237800	5.6138550658251
	TraesCS3A02G381100	1.36458602176431			TraesCS3A02G362200	1.99381653306806
	TraesCS1B02G281100	3.22050973833878			novel.11665	12.8714248087789
	TraesCS1A02G270800	2.50606182571727			novel.11885	11.2851648338068
	TraesCS3B02G413800	2.50421101717456			novel.4087	7.79316502343934
	TraesCS2B02G521800	3.56279553789991			novel.6788	12.1599859114489
	TraesCS2D02G493700	6.72786785158907			TraesCS1D02G449700	-2.51487470239842
	TraesCS1D02G218200	12.6390016259683			TraesCS1A02G441200	-3.22705106419793
	TraesCS2B02G630000	-1.00478569873362			TraesCS1B02G475700	-2.62291697173495
	TraesCS2A02G566700	-1.30003074507583			TraesCS7D02G240800	-1.07691878813975
ABF	TraesCS3D02G371900	5.11862470286872			TraesCS7A02G241800	-1.42466031687136
	TraesCS3B02G368300	1.6650459028217		SnRK2	TraesCS2B02G320500	1.0343234382028
	TraesCS6D02G312800	2.43321423567635			TraesCS3D02G374300	2.35121632344155
	TraesCS1A02G273000	1.26985125496075			TraesCS2A02G303900	1.20248841104396
	TraesCS1D02G273100	1.14161765481017			TraesCS1A02G215900	7.10954540175262
	TraesCS7A02G170600	1.11286185947423			TraesCS2A02G493800	3.27036185158327
	TraesCS3B02G411300	2.82253869722345			TraesCS1D02G271000	2.54936408336734
	TraesCS6B02G364000	3.73166165979794			TraesCS1B02G229400	5.94986961511573
	TraesCS3D02G330300	1.39736515489544			TraesCS1B02G281100	2.00172851160312
	TraesCS3A02G378700	2.77827789321547			TraesCS1A02G270800	3.83920982432122
	TraesCS7D02G171300	1.17478559404464			TraesCS3B02G413800	1.64737087795483
	TraesCS6A02G333600	3.10187988753273			TraesCS2B02G521800	2.38572585151355
	TraesCS7B02G075600	1.77553248804003			TraesCS2D02G493700	2.46720955269066
	TraesCS1B02G282800	1.88882271449018			TraesCS1D02G218200	7.05089571915877
	TraesCS5B02G139800	-1.27136735086701			TraesCS2B02G630000	-2.08031243312955
	TraesCS4A02G128900	-1.66336775602965			TraesCS2A02G566700	-1.59930832001924
	TraesCS4B02G175800	-2.147739574337			TraesCS2D02G577000	-1.43559018264705
					novel.18087	-1.30156625826945
				ABF	TraesCS3D02G371900	3.93605712782253
					TraesCS3B02G368300	1.44893593140924
					TraesCS6D02G312800	1.22816452603494
					TraesCS3B02G411300	1.75720544883809
					TraesCS6B02G364000	1.71087941316396
					TraesCS3D02G330300	1.14442271436323
					TraesCS3A02G378700	1.93432972245446
					TraesCS7D02G171300	1.03085579527764
					TraesCS6A02G333600	1.56776269683443
					TraesCS1B02G282800	1.22223348532027
					TraesCS5B02G235600	-1.02334470155713
					TraesCS2D02G467100	-1.767792800773
					TraesCS2B02G489900	-1.63343652924841
					TraesCS1B02G317100	-1.71748392917342
					TraesCS2A02G534300	-6.49747810380528
					TraesCS4A02G128900	-2.17768886852047
					TraesCS4B02G175800	-2.19554396073196

## Sheet: JA
DEGs involved in JA pathway
NAME	Liangxing66-CK_vs_Liangxing66-D	Fold change		NAME	Ziyou5-CK_vs_Ziyou5	Fold change
PLA2G16	TraesCS4D02G147400	1.69346209440164		PLA2G16	TraesCS4D02G147400	1.78183996125376
	TraesCS1B02G277000	2.92104039779941			TraesCS1B02G277000	3.03589323165563
	TraesCS6D02G224700	1.33075704530654			TraesCS1A02G218600	10.9208192021352
	TraesCS1A02G218600	11.6838424023874			TraesCS4A02G167700	1.57616662881255
	TraesCS4A02G167700	1.07163711675244			TraesCS2B02G160100	5.38472574883832
	TraesCS2B02G160100	2.5544361981622			TraesCS2D02G117100	2.24900014426523
	TraesCS2D02G117100	2.75023688478624			TraesCS2A02G117900	1.4296003502599
	TraesCS2A02G117900	1.64512756840896			TraesCS2A02G136100	4.36255514661483
	TraesCS2A02G136100	4.76322367595931			TraesCS1B02G232100	7.86784510355836
	TraesCS6A02G242700	1.34255362926152			TraesCS3B02G506700	1.09513597307477
	TraesCS1B02G232100	11.2985409279066			TraesCS3D02G505500	2.13238743464499
	TraesCS3B02G506700	1.30813638854921			TraesCS2D02G138800	4.27449857198887
	TraesCS3D02G505500	4.90913847028813			TraesCS1A02G266000	5.73510070307283
	TraesCS1B02G367500	3.4204279117121			TraesCS1D02G420400	5.90959146650949
	TraesCS2D02G138800	2.12723198664953			TraesCS6B02G281800	1.89401659672616
	TraesCS3A02G463500	1.07173804957691			TraesCS3B02G561600	6.24218379925084
	TraesCS1A02G266000	6.28014494058616			TraesCS2B02G137900	2.70495559718851
	TraesCS1D02G266200	2.20195140556141			TraesCS3A02G498700	1.3282074173676
	TraesCS1D02G420400	7.41768596167715			TraesCS1D02G220300	9.98331721243551
	TraesCS6B02G281800	2.0861229636622			TraesCS4B02G149900	1.29871258375904
	TraesCS2B02G137900	2.53183072318003			TraesCS2A02G420800	1.67917086769381
	TraesCS3A02G498700	5.51196579296316			TraesCS2D02G417800	1.69407827649506
	TraesCS1D02G220300	9.98532024163177			TraesCS2B02G439900	1.40826821117108
	TraesCS1B02G255000	1.03366430410281			TraesCS1D02G243500	-1.56511633241048
	TraesCS2A02G420800	1.51340444080978			TraesCS3A02G250600	-3.59538735847818
	TraesCS2D02G417800	1.77139096468394			TraesCS3D02G251000	-2.60037307544579
	TraesCS2B02G439900	1.34424813190994			TraesCS3B02G280100	-2.57034258458516
	novel.9366	3.92503483844486			TraesCS2B02G383100	-1.01439874377322
	TraesCS2D02G362500	-1.02293263739206			TraesCS3D02G235700	-1.54146290515951
	TraesCS3A02G250600	-1.84149410618542			novel.7487	-4.13285476810429
	TraesCS3D02G251000	-1.09960510165099			novel.7734	-1.70255672620936
	TraesCS3B02G280100	-1.0966100773868			novel.12176	-3.25837974868016
	TraesCS2B02G383100	-1.01261541794681			novel.14715	-1.20541174585735
	TraesCS2A02G364500	-1.1850705141328			novel.17655	-4.22480676783357
	TraesCS3D02G235700	-1.91302598813744		PLA2G	TraesCS4B02G217300	3.6245748149812
	novel.7487	-2.53218270863283			TraesCS3B02G332700	1.83692188313726
	novel.7734	-1.04724612020341			TraesCS3D02G298200	2.39735059093716
	novel.12176	-1.54453000080586			TraesCS3A02G303600	2.37249374816173
PLA2G	TraesCS4B02G217300	7.5786699077323			TraesCS5A02G465200	1.35080200226323
	TraesCS4D02G217600	1.00773416940742			TraesCS4D02G217600	-2.00581504546914
	TraesCS3B02G332700	2.54570219581796			TraesCS7D02G446400	-6.90324017556773
	TraesCS5B02G477000	1.03910932426298		LOX	TraesCS5D02G041100	4.08119796019641
	TraesCS3D02G298200	2.49568583263905			TraesCS5D02G013400	1.16160844877657
	TraesCS5D02G477800	1.16071440234106			TraesCS7A02G246200	2.00676836045768
	TraesCS3A02G303600	2.28741262431918			TraesCS4D02G294100	1.46065873283819
	TraesCS5A02G465200	1.82937331554142			novel.16658	1.68431224071281
	TraesCS7D02G446400	-3.91784341793261			novel.16659	1.87410065232577
LOX	TraesCS5B02G006500	3.0994818065993			TraesCS6D02G154600	-4.4255257986537
	TraesCS5D02G041100	11.4240668726234			TraesCS1D02G215800	-1.75205198446697
	TraesCS5D02G013400	4.02005253762807			TraesCS6D02G010100	-2.97931641274797
	TraesCS5A02G007900	4.00423848065385			TraesCS6B02G193400	-1.89762089672489
	TraesCS4A02G009400	1.05625775478895			TraesCS1B02G226400	-1.37096975159484
	TraesCS2A02G315100	1.35305909866281		HPL	TraesCS6D02G031100	-3.07077708266086
	TraesCS7B02G145200	1.96707210365071			TraesCS6A02G027900	-2.71267330078516
	TraesCS7A02G246200	3.34012307872258			TraesCS6B02G039500	-2.7163992912785
	TraesCS7D02G244800	1.68399255138058		AOS	TraesCS4A02G061900	7.04414208664901
	TraesCS4D02G294100	1.58970567757705			TraesCS5A02G403200	1.71455378722551
	TraesCS2D02G313400	1.51960915739167			TraesCS4D02G238800	3.34071772506763
	TraesCS4B02G295200	1.10844718016722			TraesCS4B02G237600	6.2089349230975
	novel.16658	4.7918987434171			TraesCS6A02G185100	7.11260815303571
	TraesCS6D02G154600	-1.14570998271352			TraesCS6D02G172200	6.49988450175083
	TraesCS1D02G215800	-1.08711712031997			TraesCS5D02G413200	2.3012470680803
HPL	TraesCS6D02G031100	-1.8010990107827			TraesCS4B02G237500	4.81237488904396
	TraesCS6A02G027900	-1.25273449345809			TraesCS4D02G238700	5.13258981649145
	TraesCS6B02G039500	-2.02596581803845			TraesCS4A02G061800	3.55728258538044
AOS	TraesCS4A02G061900	7.64844960531277		DOX	TraesCS4A02G090200	-4.77806823062156
	TraesCS5A02G403200	3.25812004461732		AOC	TraesCS6B02G365200	1.03149947053711
	TraesCS4D02G238800	5.0102649310426			TraesCS6A02G334800	1.42046965494848
	TraesCS5B02G408000	1.89590193956867			TraesCS6D02G314300	1.93475056353149
	TraesCS4B02G237600	7.25295932209871		OPR	TraesCS7D02G176000	7.85711474433608
	TraesCS6A02G185100	8.93840089789571			TraesCS7B02G079500	5.64022440646136
	TraesCS5D02G413200	3.20603373699787			TraesCS7A02G537100	1.21104267823373
	TraesCS4B02G237500	6.49731342163377			TraesCS6B02G353200	6.89509788436396
	TraesCS4A02G061800	6.24855381265985			TraesCS7D02G175900	3.60202884025104
DOX	TraesCS3B02G549000	7.58736771624717			TraesCS1B02G231000	9.95542594671922
	TraesCS5D02G183700	4.48835141605339			TraesCS2A02G311200	1.62362469162227
	TraesCS3B02G549200	9.02440022731133			TraesCS7D02G524400	1.26414623795126
AOC	TraesCS6A02G334800	1.69972178183624			TraesCS7A02G174700	2.21930223239672
	TraesCS6D02G314300	2.26433519563632			TraesCS7B02G311600	1.30361785657089
OPR	TraesCS7D02G176000	7.36181082218637			TraesCS7B02G455300	1.11936369922108
	TraesCS7B02G079500	7.66052810858152			TraesCS6D02G302300	7.40717050646219
	TraesCS7A02G537100	1.12662613639653			TraesCS7D02G405500	1.21569825461997
	TraesCS6B02G353200	6.06810931125948			TraesCS4D02G349500	-1.07621433093864
	TraesCS7A02G412400	1.078508045427			TraesCS5A02G525300	-4.32175753423846
	TraesCS7D02G175900	2.40150588325068			TraesCS2A02G026600	-1.29532253147936
	TraesCS1B02G231000	8.65178078355768			TraesCS5B02G487600	-6.51161806579609
	TraesCS2A02G311200	1.09595120863531		ACOX	TraesCS7B02G044200	1.08178790165551
	TraesCS7D02G524400	1.91638214203696			TraesCS1A02G110300	1.65314740032799
	TraesCS7A02G174700	1.70450198189651			TraesCS7B02G250400	1.6879505494776
	TraesCS7B02G311600	2.16963864438259			TraesCS7A02G141800	1.86773286179231
	TraesCS7B02G455300	2.02529786861799			TraesCS1B02G129300	1.92744217291448
	TraesCS6D02G302300	10.6382244888243			TraesCS7D02G004400	1.19978304610301
	TraesCS7D02G405500	1.55993537502236			TraesCS1D02G111900	1.96715896833381
	TraesCS4B02G356100	1.2297510683527			TraesCS4A02G494700	1.20387237569842
	TraesCS2A02G026600	-1.26900287185332			TraesCS7D02G346400	1.58991520671272
	TraesCS7A02G174500	-1.10599792263649			TraesCS7A02G339100	1.52071613728729
OPCL1	TraesCS4B02G326800	2.0123078045121		MFP2	TraesCS6A02G125800	2.67465433427496
	TraesCS4D02G323500	2.36279315224355			TraesCS3B02G102100	1.78982602063545
	TraesCS5A02G498800	1.4392387608654			TraesCS1A02G231100	1.2239001036464
ACOX	TraesCS7B02G044200	2.02655439753677			TraesCS1D02G231000	1.42252942461974
	TraesCS1A02G110300	1.90353921850359			TraesCS1B02G243300	1.36904015312969
	TraesCS7B02G250400	1.38259300147794			TraesCS6D02G116200	2.65731241832783
	TraesCS7A02G141800	2.51550018947811			TraesCS3A02G086700	2.13244819718207
	TraesCS1B02G129300	1.81101396193369			TraesCS6B02G153900	2.60758443182506
	TraesCS7D02G004400	1.53166011569822			TraesCS3D02G086900	2.06932250351739
	TraesCS1D02G111900	1.73955239644498		FAD	TraesCS6A02G392400	1.33927064210049
	TraesCS4A02G494700	1.08525696574643			TraesCS1D02G142700	1.17981068875278
	TraesCS7D02G346400	1.57173675943137			TraesCS6B02G432600	1.50357296379671
	TraesCS7A02G339100	1.15682937467922			novel.14694	2.00022084566372
	TraesCS7D02G143200	1.18533125992477		JAR1	TraesCS1D02G434100	1.67752532827664
MFP2	TraesCS6A02G125800	1.6241637901917			TraesCS5A02G245200	-2.13227694365206
	TraesCS3B02G102100	1.66502377902493			TraesCS5D02G251800	-1.29371349328615
	TraesCS1A02G231100	1.45847019571997		COI1	TraesCS3D02G410300	-1.01538718483489
	TraesCS6D02G116200	2.68435390791472		JAZ	TraesCS7B02G107800	5.11051535133999
	TraesCS3A02G086700	1.95767801834561			TraesCS1B02G066000	3.04519546956736
	TraesCS6B02G153900	2.04138097720469			TraesCS4A02G008000	7.92633433856218
	TraesCS3D02G086900	1.86662259163255			TraesCS1A02G049600	3.012977499041
FAD	TraesCS6A02G392400	2.04532384388866			TraesCS7A02G201500	5.67104857596483
	TraesCS6B02G432600	1.76560711698548			TraesCS4A02G007900	3.87315114322579
	novel.8527	6.25520905649232			TraesCS5B02G211000	3.54715839915369
	novel.14694	1.99963800769579			TraesCS7D02G204300	4.29679661404263
JAM	TraesCS3D02G256000	1.40515584363051			TraesCS4D02G296000	3.11489637177205
	TraesCS3A02G255100	2.53246720813592			TraesCS7A02G201400	5.89239777760151
	TraesCS3A02G387300	-1.38377282250424			TraesCS7B02G108300	8.07871727151572
JAR1	TraesCS5B02G242700	1.46193259064329			TraesCS7D02G204200	4.52873757039361
JAZ	TraesCS7B02G107800	9.34858378553197			TraesCS7A02G201300	6.47913762512536
	TraesCS1B02G066000	4.70912190757472			TraesCS7B02G108400	5.23036912757818
	TraesCS4A02G008000	8.37770719440009			TraesCS5A02G212800	2.0154473603103
	TraesCS1A02G049600	3.99523590079176			TraesCS7B02G107900	6.59608688689095
	TraesCS7A02G201500	7.59875120927578			TraesCS7A02G201200	5.93622141383277
	TraesCS4A02G007900	4.63783480532466			TraesCS4D02G295800	8.59044053357513
	TraesCS5B02G211000	5.0931588338934			TraesCS4B02G297000	2.89423795820078
	TraesCS7D02G204300	8.71900745537474			TraesCS7A02G201100	5.91124284528087
	TraesCS4D02G296000	5.4154313443497			TraesCS2A02G286700	7.62436547778228
	TraesCS7A02G201400	6.57904243973957			TraesCS2D02G285300	6.96129199089286
	TraesCS7B02G108300	8.24185584716539			TraesCS4B02G297100	1.86953442811875
	TraesCS7D02G204200	8.40578265417388			TraesCS1D02G052000	2.84144925059196
	TraesCS7B02G108000	3.56156565570362			TraesCS5D02G219300	2.13807398420418
	TraesCS7A02G201300	8.28726159325481			TraesCS4A02G007800	3.60812981700158
	TraesCS5A02G212800	4.21074587715075			TraesCS7B02G107700	4.97151279986867
	TraesCS7B02G107900	6.24718740992549			TraesCS7B02G108200	-1.91451120919436
	TraesCS7A02G201200	8.38004364832818			TraesCS3B02G285600	-4.04438195111241
	TraesCS4D02G295800	8.52762716232484			TraesCS3A02G253700	-4.49884365534424
	TraesCS4B02G297000	3.69411941346088			TraesCS3D02G254600	-3.64514700389014
	TraesCS7A02G201100	8.89611068678124		MYC2	TraesCS5B02G307100	11.2069412555329
	TraesCS4D02G295900	1.93094701145172			TraesCS2D02G270300	1.87173895087981
	TraesCS2A02G286700	6.31379119408013			TraesCS3B02G284800	5.74368228915541
	TraesCS7D02G204600	5.64991359567964			TraesCS3A02G252900	3.96154379684009
	TraesCS2D02G285300	7.46708372987937			TraesCS2A02G409400	2.11036654188554
	TraesCS4B02G297100	2.52543072066007			TraesCS3B02G288700	8.09080325838153
	TraesCS1D02G052000	4.05940894999905			TraesCS3A02G158600	1.01456237543548
	TraesCS5D02G219300	4.62900139412595			TraesCS3D02G253700	2.80587599399727
	TraesCS4A02G007800	5.43938060557327			TraesCS5A02G503500	1.55536926372411
	TraesCS7B02G107700	4.72411247018236			TraesCS5D02G313700	10.4321607719091
	TraesCS5D02G211200	1.15456935822952			TraesCS2B02G289900	2.02322021314354
	TraesCS5B02G203400	1.22263805222896			TraesCS2A02G448500	11.7820342177696
	TraesCS3B02G285600	-4.83153154041746			TraesCS2A02G271700	2.31707590907547
	TraesCS3A02G253700	-3.06044985425491			TraesCS5D02G020600	2.66727511617967
MYC2	TraesCS5B02G307100	12.0368715566539			TraesCS5A02G533200	-1.76752447169253
	TraesCS3B02G284800	8.55714422357269			TraesCS3B02G236900	-1.09833603539296
	TraesCS3A02G252900	5.46635482685608			TraesCS3A02G028200	-2.15132152770317
	TraesCS3D02G166300	1.02947223048191			TraesCS5A02G533900	-3.63466671134273
	TraesCS2A02G409400	4.48534915586086			TraesCS5A02G489500	-3.67055290372976
	TraesCS3B02G288700	7.34703945199126			TraesCS4D02G056900	-1.81714540475646
	TraesCSU02G029400	3.70383070868996			TraesCS3B02G018400	-1.93180966509654
	TraesCSU02G138900	1.97352386764912			TraesCS4D02G328900	-1.17424295428997
	TraesCS5A02G503500	2.20438244456637			TraesCS3D02G210600	-1.08642628407231
	TraesCS5D02G313700	8.84855020077987			TraesCSU02G138400	-1.76023094437977
	TraesCS4B02G364800	2.94521765959448
	TraesCS2A02G448500	7.74455238932818
	TraesCS2A02G271700	1.82885767121996
	TraesCS5D02G020600	3.90568437863839
	TraesCS2D02G406900	2.66843264559953
	TraesCS3B02G236900	-2.26778483989684
	TraesCS3A02G028200	-2.1582499279518
	TraesCS5A02G533900	-4.29064493059879
	TraesCS5A02G489500	-1.74622039943743
	TraesCS4D02G056900	-2.34155526778983
	TraesCS3D02G210600	-2.09954649078495

## Sheet: IAA
DEGs involved in IAA pathway
NAME	Liangxing66-CK_vs_Liangxing66-D	Fold change		NAME	Ziyou5-CK_vs_Ziyou5	Fold change
AROK	TraesCS7A02G184600	2.05346277487457		AROK	TraesCS7A02G184600	1.81060545132089
	TraesCS1D02G199100	1.16675454036717			TraesCS7D02G186100	3.60502914099727
	TraesCS7D02G186100	5.20224101004424			TraesCS6D02G284500	1.42992970904629
	TraesCS6D02G284500	2.0940040208673			TraesCS6A02G305400	2.18384499601441
	TraesCS6A02G305400	2.41884857802343			TraesCS6B02G333600	2.74036942270374
	TraesCS6B02G333600	4.42239817117243			TraesCS3B02G097800	-2.60803343347609
	TraesCS3B02G097800	-1.47125635205157			TraesCS1A02G195500	-1.31070632949269
	TraesCS3D02G083400	-1.48221941993253			TraesCS1D02G199100	-1.05416853762843
	TraesCS3A02G082700	-1.22529448926912			TraesCS3D02G083400	-2.72036749639972
AROA	TraesCSU02G063500	1.7638677203457			TraesCS3A02G082700	-2.61702629834746
	TraesCS7D02G066600	1.13828278078007		AROA	TraesCS7A02G071200	1.231446212482
AROC	TraesCS4A02G083400	1.27513164356598			TraesCSU02G063500	2.37901132559505
	TraesCS4B02G220800	1.41149326519322			TraesCS7D02G066600	1.66929775682176
TRP3	TraesCS2A02G336500	1.19175855786539		AROC	TraesCS4D02G221100	1.00446670622525
	TraesCS2D02G326400	1.39485056633565			TraesCS4A02G083400	1.1811798209521
	TraesCS2B02G345400	1.05948814285174			TraesCS4B02G220800	1.96195863987861
	TraesCS5B02G502700	-1.87836784828912		TRP3	TraesCS2A02G336500	1.50505019344736
	novel.10681	-1.17605331243235			TraesCS2D02G326400	1.59237373063581
TRPD	TraesCS4B02G318900	1.25823652125646			TraesCS2B02G345400	1.18731110499315
TRP1	TraesCS7B02G241200	2.48618782995401			TraesCS4A02G036400	-1.13673637952768
	TraesCS7A02G341700	-1.35008331627395			TraesCS4B02G269300	-1.05960139322848
TRP	TraesCS7B02G423900	2.27940700007858			TraesCS4D02G268500	-1.17616389663814
	TraesCS7D02G501700	1.63998654549323		TRPD	TraesCS4B02G318900	1.82507381789083
	TraesCS7A02G512300	1.11474344876682		TRP1	TraesCS7B02G241200	2.92987966670811
	TraesCS1B02G270000	1.37853955291065		TRP	TraesCS7B02G423900	1.51185621228963
TRPA	TraesCS1B02G463100	2.11216037944668			TraesCS2D02G329500	-1.38881972656914
	TraesCS1A02G428400	1.78793620318499			TraesCS2A02G335200	-1.15127947300819
	TraesCS1D02G437700	2.04831390400217			TraesCS1D02G259500	-1.9769281706244
	TraesCS7B02G208700	1.04421520374775		TRPA	TraesCS1A02G428400	1.77017655484004
	TraesCS7A02G308600	1.0410938424558			TraesCS1D02G437700	1.55291803088799
	TraesCS7B02G294800	1.31117075800745			TraesCS7D02G388400	2.20238455396092
	TraesCS7D02G388400	3.75515376394708			TraesCS7A02G392800	2.4134024611383
	TraesCS7A02G392800	3.00836838166088			TraesCS5B02G444300	-1.80918005061205
	TraesCS3B02G104200	-1.06530642775736		DDC	TraesCS1A02G329500	1.84387583150871
DDC	TraesCS1A02G329500	4.481780980915			TraesCS7A02G387000	5.31489265321758
	TraesCS7A02G387000	8.54649772042535			TraesCS6B02G017500	2.29055044610419
	TraesCS6B02G017500	4.07988145405546			TraesCS1B02G343000	5.21018656564867
	TraesCS1B02G343000	7.20349102135009			TraesCS7D02G383500	8.59589281507517
	TraesCS3B02G340000	2.56283802415143			TraesCSU02G249900	10.2740318463212
	TraesCS7D02G383500	8.47377049689579			TraesCS3D02G305600	3.37762444438448
	TraesCSU02G249900	8.74896499398503			TraesCS1D02G331600	2.29566205038409
	TraesCS3D02G305600	4.914495994497			TraesCS3A02G296900	2.12229696976311
	TraesCS6D02G014100	2.10705690521168			TraesCS4D02G344000	-1.53527238513568
	TraesCS3A02G296900	5.36175737956615			TraesCS4A02G441900	-3.79472648221247
	TraesCS4D02G344000	-3.2495778822387			TraesCS5A02G131000	-1.10880025836866
	TraesCS5B02G130900	-1.19514396278847		ALDH	TraesCSU02G066700	2.15616737582235
ALDH	TraesCSU02G066700	2.92716399858755			TraesCS6D02G272400	9.301334361504
	TraesCS6D02G272400	11.8879348240621			TraesCS4D02G094500	1.46893457062194
	TraesCS4D02G094500	1.727655040944			TraesCS2A02G388900	3.00093138179499
	TraesCS2A02G388900	3.12322256394991			TraesCS2D02G386700	1.21528006269728
	TraesCS2D02G386700	1.38091934460083			TraesCS2B02G406900	5.69177372755526
	TraesCS2B02G406900	4.67741164263406			TraesCS4A02G219900	1.5667194645444
	TraesCS4A02G219900	1.90577104490027			TraesCS7B02G116800	1.70895234172995
	TraesCS4B02G098300	1.03514337154102			TraesCS6D02G222000	1.06057680712623
	TraesCS5D02G127300	5.26442867810425			novel.12896	8.34050250053566
	TraesCS5B02G210100	5.95520837836852			TraesCS5B02G210100	5.32121780842664
	TraesCS5A02G213600	4.78264010888207			TraesCS5A02G213600	4.62375577314755
	TraesCS5D02G218400	6.67568785208552			TraesCS5D02G218400	6.10361272765677
	novel.3901	12.4279327577944			novel.1126	1.32180368520212
	TraesCS6D02G222300	-1.23338699235787			novel.3901	8.01019043472231
	TraesCS6B02G284600	-1.65924184488021			TraesCS6D02G222300	-1.15290515190046
	novel.7703	-2.46589739971975			TraesCS6B02G284600	-1.88561932602627
	novel.13640	-2.12549206934856			novel.7703	-4.14678415106463
AANAT	TraesCS5B02G144800	-1.41965022926849			novel.13640	-3.26990810106323
	TraesCS7A02G327800	-1.22584628305087			novel.13780	-1.92733952311023
ASMT	TraesCS2D02G030500	1.79930503188635			novel.13943	-1.78385671403563
	TraesCS4A02G463400	3.60758868450455		AANAT	TraesCS7D02G324600	-2.59115379430257
	TraesCS2B02G041200	1.68502872991405			TraesCS1B02G312700	-1.12183722493014
	TraesCS1A02G335200	3.13533332716413			TraesCS5B02G144800	-1.63650145167097
	TraesCS7A02G046800	2.22019648420166			TraesCS1D02G301900	-1.84373514817185
	novel.8455	1.15272392565156			TraesCS5A02G145900	-2.20915461153619
	novel.8456	1.46086776439747			TraesCS1A02G302500	-1.63393391406083
	novel.1793	8.71055345682538			TraesCS7B02G228500	-2.15662144812549
	TraesCS6A02G405200	2.1216283275724			TraesCS7A02G327800	-3.10839191670191
	TraesCS1D02G338100	-2.3477845286524		ASMT	TraesCS1A02G335100	8.14769614511948
	TraesCS1D02G338200	-2.89385432570586			TraesCSU02G253900	8.09826661398378
	TraesCS1B02G349100	-3.54280527650039			novel.1793	9.26006149796265
	TraesCS1B02G348900	-1.3150655648171			TraesCS1D02G338100	-3.66264979405804
	TraesCS1A02G335800	-1.17961942472069			TraesCS1D02G338000	-3.46012107010624
	novel.4293	-1.04496982976795			TraesCS1D02G338200	-4.56418646534682
TAA1	TraesCS3B02G327600	1.5544574426465			TraesCS6A02G015400	-2.08225016577599
	TraesCS1D02G402000	2.47188045419663			TraesCS3D02G392500	-1.13437301605132
	TraesCS3D02G292600	2.45937462158119			TraesCS1B02G349100	-4.61413536404247
	TraesCS3B02G108100	1.16980822713965			TraesCS6B02G022400	-1.25632497848515
	TraesCS3A02G292800	1.91005387436771			TraesCS1A02G335800	-3.00957662603764
	TraesCS1B02G133900	-6.01390031312748			novel.611	-1.65684680395087
	TraesCS1A02G113700	-1.06135894142531			TraesCS6B02G449400	-2.59052166770413
ISS1	TraesCS3B02G141600	2.73725719938618			TraesCS6D02G388700	-1.48709996115574
	TraesCS3A02G122400	2.11146508961087		TAA1	TraesCS3B02G327600	1.72362385229164
	TraesCS3D02G124300	2.25293763097302			TraesCS1D02G402000	2.02120584467336
AMI	novel.10932	13.4918748498349			TraesCS3D02G292600	2.04958771067183
	novel.1369	10.8410321404845			TraesCS3B02G108100	1.25033066689686
	novel.657	10.4530863223895			TraesCS3A02G292800	1.34161408132273
	TraesCS1B02G448000	-1.61155380285439			TraesCS1B02G133900	-7.66008467697214
	TraesCS2D02G573400	-1.31328539072445			TraesCS3B02G108200	-1.83277001319213
	TraesCS2B02G603900	-1.02998714116482			TraesCS3D02G093300	-1.98120023840941
	TraesCS2D02G027200	-1.57684905792402			TraesCS1A02G113600	-5.57342447909327
AAO	TraesCS5D02G436200	-1.27228131380427		ISS1	TraesCS3B02G141600	3.00325940379703
YUCCA	TraesCS7D02G060000	3.8721503934253			TraesCS3A02G122400	2.08618357255178
	novel.11496	10.2399517090041			TraesCS3D02G124300	2.60798636221836
	novel.11497	11.987551690104		AMI	TraesCS2B02G037400	2.37843702558867
	novel.14326	3.65805394457827			TraesCS6D02G298000	1.08604504584215
	novel.14358	3.23404265664024			novel.7966	9.31318565447344
	TraesCS5A02G464800	-1.31447674519027			novel.10932	12.163981516147
	novel.8363	-1.193090571597			novel.1369	8.28953892566049
	novel.14165	-1.52661389790454			novel.5883	4.27401413897854
	novel.1956	-1.38544041194299			novel.657	9.97945631986982
AUX1	TraesCS4B02G226500	7.37043556898736			novel.6945	7.21689081429133
	TraesCS3A02G369200	-1.01223331622248			TraesCS1B02G448000	-1.83142277015548
TIR1	TraesCS1A02G091300	1.19213908415129			TraesCS1D02G249400	-1.14989349767191
	TraesCS7B02G081200	1.01354108742562			TraesCS2D02G573400	-1.82800764325486
AUX/IAA	TraesCS2B02G534500	8.30414475883827			TraesCS2A02G562400	-1.11964852133823
	TraesCS5D02G449400	1.81781549983085			TraesCS2B02G603900	-1.43935887029687
	TraesCS7D02G339300	2.61895280945543			TraesCS2D02G027200	-1.03977692906114
	TraesCS3D02G276600	1.00228770325464			TraesCS2D02G573300	-1.48757206343785
	TraesCS3A02G276500	1.46966633989941		AAO	TraesCS5B02G429900	-2.67888458161159
	TraesCS5A02G378300	8.70446659587999			TraesCS5D02G436200	-2.4160865118295
	TraesCS1A02G343300	1.67367248910655			TraesCS5D02G435700	-1.23587689267157
	TraesCS2D02G506900	6.36433829575279		YUCCA	TraesCS3B02G467700	1.1945412900662
	TraesCS6B02G432800	-2.22044305600911			TraesCS3A02G429800	1.24143634628036
	TraesCS5B02G386800	-1.30731988685065			novel.11497	9.17180055633873
	TraesCS3A02G121300	-1.22547937166828			novel.14326	3.88267356130843
	TraesCS3B02G140700	-1.52833389753905			novel.14358	1.44508578082441
	TraesCS3A02G108400	-1.30123727427565			TraesCS4B02G206000	-1.04855634721573
	TraesCS1B02G418400	-1.22921321683474			TraesCS5A02G464800	-2.03650338094987
	TraesCS3D02G110200	-1.82351702583598			TraesCS3A02G096600	-1.07342479707817
	TraesCS3D02G123400	-1.55176191680676			novel.8363	-2.16150702852554
	TraesCS6A02G392600	-1.51401692864686			novel.14165	-2.80095711701333
	novel.1066	-5.14112255006042			novel.1956	-1.80975318364937
ARF	TraesCS7D02G409700	1.36249200149104			novel.6084	-1.1744625022168
	TraesCS7D02G436800	2.21767574314437		AUX1	TraesCS3A02G369200	-1.35966280536752
	TraesCS6B02G141300	2.92757033043141		TIR1	TraesCS1D02G099900	1.1674667780184
	TraesCS7B02G346700	1.5040715321126			TraesCS1A02G091300	1.56744518852902
	TraesCS7D02G161900	2.76551137282246			TraesCS7B02G081200	1.56921858268325
	TraesCS6D02G102300	1.80904348898482		AUX/IAA	TraesCS2B02G534500	6.61889976710864
	TraesCS7B02G065800	1.08134827205407			TraesCS5D02G388300	7.15988496016196
	TraesCS6A02G138600	1.22380230958796			TraesCS7D02G339300	1.72712143327368
	TraesCS7A02G461700	-1.28854745691319			TraesCS5A02G378300	9.55755855311002
	TraesCS3A02G449300	-1.82536814544707			TraesCS2D02G506900	6.553336221352
	TraesCS2A02G380300	-1.11514453659155			TraesCS6B02G432800	-2.61159494289776
	TraesCS5D02G045700	-1.6658337309868			TraesCS5B02G386800	-1.33591504023939
	TraesCS3D02G442000	-1.66674440420981			TraesCS1D02G084100	-2.15152826190149
	TraesCS1A02G334900	-2.81310517191793			TraesCS3A02G121300	-2.22174337551314
	TraesCS3A02G292400	-1.08534992628233			TraesCS3B02G127400	-2.24257779927255
	TraesCS7D02G449900	-1.31968477535093			TraesCS3B02G140700	-2.29921719553113
	TraesCS3B02G486000	-1.38557740527785			TraesCS5D02G069300	-1.4885083667913
	TraesCS3A02G159200	-1.65506165925994			TraesCS1D02G119500	-1.23588843315673
	TraesCS3D02G292100	-1.42118497588343			TraesCS3A02G108400	-2.4523205757735
	TraesCS1D02G337400	-1.56653274174175			TraesCS1B02G138100	-1.1426878502212
	TraesCS3B02G273400	-1.40392416652925			TraesCS5B02G446100	-1.44577277633797
	TraesCS6B02G258800	-1.13609318958664			TraesCS3D02G110200	-2.98555373672982
	TraesCS7B02G363100	-1.28403133819273			TraesCS3D02G123400	-2.40433568675886
	novel.11111	-1.61620068402675			TraesCS1A02G118400	-1.28204631062409
	novel.14128	-1.53820723545158			TraesCS1A02G082700	-1.66181963200664
GH3	TraesCS2D02G191800	3.01184514384754			TraesCS6A02G392600	-1.92488798436611
	TraesCS2B02G210600	3.14983088259337			TraesCS7A02G371500	-1.04411725647524
	TraesCS3B02G335300	12.1951724389482			novel.8952	-6.7860689758517
	novel.8683	8.28187007706997			novel.1066	-5.1179101996391
	novel.16296	8.12717602454137		ARF	TraesCS7A02G416400	1.08462655933046
	TraesCS3A02G145300	-1.73769026116903			TraesCS7D02G409700	1.60362912594072
	novel.7291	-1.68790842589089			TraesCS7D02G436800	1.49880585503255
SAUR	TraesCS6D02G220700	1.01848257409156			TraesCS6B02G141300	2.13497761165431
	TraesCS7D02G381000	1.5620628298806			TraesCS1D02G404400	1.3813685342579
	TraesCS5B02G212500	2.01810518711807			TraesCS6A02G112000	1.02536449646491
	TraesCS6B02G359400	1.40995062683041			TraesCS7B02G346700	1.02982553623489
	TraesCS6D02G307600	1.00158003926243			TraesCS7D02G161900	2.53710995140138
	TraesCS7B02G287200	2.34051301072921			TraesCS7A02G160800	1.74542858384772
	TraesCS1B02G201800	1.56377659571542			TraesCS6D02G102300	2.27289003621237
	TraesCS7A02G418100	-3.43657738018456			TraesCS7B02G065800	1.18330494562682
	TraesCS5B02G288000	-2.31725468616717			TraesCS6D02G100900	1.68869741470644
	TraesCS6B02G359900	-1.1116399644155			TraesCS3A02G449300	-1.6933212894813
					TraesCS2A02G380300	-1.0795443241826
					TraesCS5D02G045700	-1.05505227674318
					TraesCS3D02G442000	-1.65103169482935
					TraesCS1A02G334900	-1.80199789619241
					TraesCS3A02G292400	-1.07703082813585
					TraesCS3B02G327000	-1.67548545727334
					TraesCS7D02G449900	-1.14742358672359
					TraesCS2B02G578500	-1.22067635323431
					TraesCS3B02G486000	-1.39171654195717
					TraesCS3D02G292100	-1.89368536938058
					TraesCS6B02G258800	-2.69654264670826
					TraesCS7B02G363100	-1.35366917038998
					novel.1063	-1.61850613535137
					novel.11111	-1.80478367141072
					novel.14128	-8.23435964314797
					novel.15925	-1.05321194498028
					novel.5342	-4.66496675671799
				GH3	TraesCS2D02G191800	1.31002086340159
					TraesCS2B02G210600	2.24767896773475
					TraesCS3B02G335300	9.74495660869703
					novel.8683	9.81574688509009
					novel.16296	9.41896199553829
					TraesCS3A02G145300	-2.5746223973777
					TraesCS3B02G172400	-1.55827411528247
					novel.7291	-3.07371998771353
				SAUR	TraesCS6D02G307800	1.81595198485332
					TraesCS6D02G130600	2.17919708739542
					TraesCS6B02G169500	2.63185796961212
					TraesCS6A02G238300	-1.07849725926866
					TraesCS1A02G178700	-2.09731351597595
					TraesCS7A02G418100	-6.73158943789968
					TraesCS7D02G411100	-8.32350404135509
					TraesCS6A02G328900	-1.19421375757996
					TraesCS7B02G318200	-8.02862956680033
					TraesCS6A02G329100	-1.62623258051362
					TraesCS6D02G307900	-1.01881358980827
					TraesCS5D02G347900	-1.20416490522637
					TraesCS5B02G342500	-1.33960005629087
					TraesCS6B02G359900	-1.68600525553427

## Sheet: SA
DEGs involved in SA pathway
NAME	Liangxing66-CK_vs_Liangxing66-D	Fold change		NAME	Ziyou5-CK_vs_Ziyou5	Fold change
PAL	TraesCS2D02G377600	1.66918413826561		PAL	TraesCS2D02G377600	2.57570967989244
	TraesCS1A02G037800	6.13423234997736			TraesCS1A02G037800	4.5005484060095
	TraesCS2D02G377500	2.31261525533607			TraesCS1B02G122800	4.27738099288403
	TraesCS2D02G377400	3.61471492195387			TraesCS2D02G377500	3.56268960090141
	TraesCS2B02G398400	2.56739683901893			TraesCS1D02G039300	1.85201979907373
	TraesCS2B02G398200	3.87740251992162			TraesCS2D02G218700	1.23387405728051
	TraesCS2A02G380900	3.14133927520261			TraesCS2D02G377400	5.54543440424156
	TraesCS2B02G398300	2.45014200303849			TraesCS2B02G398400	3.35672953720948
	TraesCS2A02G380800	1.57297543503924			TraesCS2B02G398200	5.56396502262449
	TraesCS6B02G258600	3.62365653108937			TraesCS2A02G196700	2.1713925351217
	TraesCS2A02G381100	2.56664822636009			TraesCS2A02G380900	3.89475249616232
	TraesCS2A02G381000	4.20367752373363			TraesCS2D02G377200	1.30408708740423
	TraesCS6B02G258500	3.90382579304784			TraesCS1B02G048300	2.69917768702083
	TraesCS6A02G222800	3.36184692441255			TraesCS5B02G468300	1.00482378020799
	TraesCS6D02G212400	3.71721352012786			TraesCS2B02G398300	3.58595638818866
	TraesCS4A02G401300	2.10025877634235			TraesCS2B02G224000	5.0224440864867
PTAL	TraesCS6B02G258400	5.16295840196394			TraesCS2A02G380800	2.94086899020727
	TraesCS6A02G222900	4.77984509004275			TraesCS2D02G204700	2.38339992491179
	TraesCS6D02G212200	4.94080406399801			TraesCS6B02G258600	3.42423756148779
ICS	TraesCS6B02G219500	-1.84521310801661			TraesCS2A02G381100	2.8845549066254
NPR1	TraesCS5B02G544700	-1.74916025515569			TraesCS1B02G048500	2.76396083452302
	TraesCS4A02G294400	-2.69177670407351			TraesCS2A02G381000	5.72644815261752
	TraesCS5D02G139600	-1.80489294681944			TraesCS6B02G258500	3.74972477954813
	TraesCS7A02G022800	-1.62919440632026			TraesCS6A02G222800	3.83493142248308
	TraesCS4B02G018900	-2.73028743227481			TraesCS6D02G212400	3.65676288836459
	TraesCS2A02G563400	-1.12711608969896			TraesCS1A02G094900	7.39411738332528
	TraesCS5A02G134700	-2.12440109418075			TraesCS1D02G103500	5.37445934562664
	TraesCS4D02G017500	-2.10519321853534			TraesCS6A02G222700	3.51683094613754
	novel.15539	-1.05916023398865		PTAL	TraesCS6B02G258400	4.54207577898785
	novel.7221	-1.77619950739558			TraesCS6A02G222900	3.98014056956808
TGA	TraesCS4A02G126300	1.55749681004301			TraesCS6D02G212200	4.19576550717673
	TraesCS4D02G180200	1.44170119628663		ICS	TraesCS5B02G189100	-2.38094040451214
	TraesCS6D02G154400	1.00578475424903			TraesCS5D02G196200	-1.57415803707422
	TraesCS4B02G178600	1.51289238467474			TraesCS5A02G193800	-1.8457643557324
	TraesCS3A02G372400	-2.78348360622793		NPR1	TraesCS4A02G294400	-2.67631918402197
	TraesCS2B02G186400	-1.13485354200934			TraesCS5D02G139600	-1.45188247829334
	TraesCS3D02G365200	-1.24466142838492			TraesCS4B02G018900	-3.399335827178
	TraesCS3B02G404800	-2.54954346905465			TraesCS2A02G578900	-1.33534924387198
	TraesCS2D02G167500	-1.1192959295081			TraesCS5A02G134700	-2.00236782688427
PR1	TraesCS5B02G181500	3.50518590658022			TraesCS4D02G017500	-2.25674859319258
	TraesCS5D02G446900	1.9712214998032			novel.7221	-1.38162138239144
	TraesCS3A02G477300	2.55148288463334		TGA	TraesCS4A02G126300	1.93154410641858
	TraesCS7D02G201400	9.40982942218109			TraesCS4D02G180200	1.69729602388601
	TraesCS5A02G183300	4.7822344018852			TraesCS2A02G486100	9.24392497130492
	TraesCS5D02G446800	2.81619280354107			TraesCS4B02G178600	1.82996646152499
	TraesCS7D02G161200	2.23153591343746			novel.5035	10.2294307092572
					TraesCS3A02G372400	-3.945277685191
					TraesCS2A02G160100	-1.38009489609053
					TraesCS3A02G103500	-2.52907080717095
					TraesCS2B02G186400	-1.35297773140205
					TraesCS3B02G404800	-2.59057962298711
					TraesCS2D02G167500	-1.2058012632789
					TraesCS1D02G276100	-1.25503228766177
				PR1	TraesCS4D02G062500	9.38157032129337
					TraesCS3A02G477300	1.91811249232996
					TraesCS7D02G201400	9.0462087784519
					TraesCS7B02G105100	8.61832746401915
					TraesCS5D02G446800	3.39706286035692
					TraesCS4B02G063600	7.64187269254382

## Sheet: phenolamides and antioxidant
DEGs involved in phenolamides and antioxidant biosynthesis pathway
NAME	Liangxing66-CK_vs_Liangxing66-D	Fold change		NAME	Ziyou5-CK_vs_Ziyou5	Fold change
ARG	TraesCS2A02G035700	3.14697519633954		ARG	TraesCS2A02G035700	2.89081088834189
	TraesCS2D02G034900	3.02080406421186			TraesCS2D02G034900	2.83181086818869
	TraesCS2B02G048700	2.98401868606964			TraesCS2B02G048700	3.20803211636815
NOS1	TraesCS6B02G020800	1.24641941897446		NOS1	TraesCS6B02G020800	1.01091350242592
ARD	TraesCS4A02G419400	5.28005220178674			TraesCS6A02G013600	-1.26552227818585
	TraesCS1B02G018200	10.2303780607431			TraesCS5A02G006100	-1.47657308265624
	TraesCS2D02G069900	8.64803927178866			TraesCS6D02G017000	-1.32703274954344
	TraesCS1D02G012300	8.70071960929119			TraesCS5D02G006100	-1.18787318072715
	TraesCS2A02G071200	9.4567185017626			TraesCS5B02G191600	-1.03765140918274
	TraesCS7A02G069300	2.32284282820841			TraesCS5B02G005000	-1.48451982350588
	TraesCS7D02G063900	4.254425959391		ARD	TraesCS4A02G419400	4.32006539267831
	TraesCS4B02G320500	-1.73332113437327			TraesCS1B02G018200	9.58984772905821
	TraesCS4D02G317000	-1.84913779091027			TraesCS2D02G069900	8.92693196415618
ACT	TraesCS2A02G524900	3.2277177865911			TraesCS1D02G012300	8.1186285038217
	TraesCS2B02G555100	2.23494990962198			TraesCS2A02G071200	9.38961507270839
ARG	TraesCS2A02G035700	3.14697519633954			TraesCS7A02G069300	1.69961549036367
	TraesCS2D02G034900	3.02080406421186			TraesCS7D02G063900	3.19771336147677
	TraesCS2B02G048700	2.98401868606964			TraesCS4B02G320500	-2.32108277334742
proB	TraesCS1D02G280700	3.59418312653382			TraesCS4D02G317000	-1.54772717044398
	TraesCS1B02G290600	4.44687569259758		ACT	TraesCS2A02G524900	1.47197173154967
	TraesCS1A02G281400	2.39024780866458			TraesCS2B02G555100	1.10139608351214
	TraesCS3D02G357200	9.24987642026201		ARG	TraesCS2A02G035700	2.89081088834189
	TraesCS3B02G395900	8.15630957678305			TraesCS2D02G034900	2.83181086818869
	TraesCS3A02G363700	9.6983439684837			TraesCS2B02G048700	3.20803211636815
ROCD	TraesCS5A02G375000	4.65497590232833		proB	TraesCS1D02G280700	4.63600693245867
	TraesCS5D02G384500	3.34290405285934			TraesCS1B02G290600	4.30365389623505
	TraesCS5B02G376900	3.10637850196271			TraesCS1A02G281400	4.82277823746575
proC	TraesCS3B02G538100	3.83808715015357			TraesCS3D02G357200	9.27362938279439
	TraesCS3D02G483400	3.50897829157675			TraesCS3B02G395900	8.3708736832271
pip	TraesCS1D02G336300	1.88212380551419			TraesCS3A02G363700	9.1372352832008
	novel.1551	1.43080673480552		ROCD	TraesCS5A02G375000	4.44535397052949
	novel.6756	-11.9207743354769			TraesCS5D02G384500	3.28683104632869
P4HA	TraesCS4A02G072700	1.43336522102578			TraesCS5B02G376900	3.12591348786862
	TraesCS1B02G186400	1.23410307802524		proC	TraesCS3B02G538100	3.44208974711744
	TraesCS4B02G228600	1.98005311120667			TraesCS2B02G537900	3.80986918262671
	TraesCS4D02G229700	1.21937607325921			TraesCS3D02G483400	3.21607981914785
	TraesCS6D02G393500	2.21452335649912			novel.3277	4.9871712129018
GOT1	TraesCS3B02G331100	3.83749037197985			novel.933	-1.95769514147212
	TraesCS3A02G305400	2.75835506831941		pip	TraesCS1D02G336300	2.39611886647493
	novel.7569	3.63981548955572			TraesCS1A02G333700	1.24642081052638
	TraesCS6D02G022800	1.28608974708779			novel.1551	1.97678904743304
	TraesCS7A02G353500	3.27626535971033		P4HA	TraesCS4A02G072700	1.46921875846498
	TraesCS7B02G274100	2.74387451548617			TraesCS1A02G170900	1.00282088405427
	TraesCS6A02G018600	1.05483080846047			TraesCS1B02G186400	1.25923604951988
	TraesCS7D02G369300	2.68576061339213			TraesCS4B02G228600	1.96147120674694
	TraesCS6B02G026900	1.21875027536486			TraesCS4D02G229700	1.18026860314083
ODC1	TraesCS5D02G342000	9.81414087976805			TraesCS2D02G273700	1.11001326938139
	TraesCS5B02G336200	9.62372157492664			TraesCS6A02G410600	2.96310285589884
	TraesCS5A02G337400	9.91172975245712			TraesCS6D02G393500	1.75025865725131
	TraesCS7D02G156900	9.56207074738178			novel.12606	-8.5521223009329
SPE	TraesCS7D02G266000	1.01725537686901		GOT1	TraesCS3B02G331100	3.2352718015314
	TraesCS7D02G265900	3.14489507745971			TraesCS3A02G305400	2.42410207836104
PAO	TraesCS2B02G579100	1.79292612651252			novel.7569	3.24809151186457
	TraesCS2B02G490100	1.41870832407068			TraesCS6D02G022800	1.82876520988489
	TraesCS2B02G579000	1.04903893158521			TraesCS7A02G353500	2.87692343399884
	TraesCS2D02G467300	1.68747608672332			TraesCS7B02G274100	2.5892320795786
	TraesCS2A02G467300	1.93758163011319			TraesCS6A02G018600	1.32456660396053
SMOX	TraesCS7A02G378800	3.79185501120864			TraesCS7D02G369300	2.61930924298135
GSR	TraesCS6B02G423100	1.60651341307497			TraesCS6B02G026900	1.50491452123898
	TraesCS6B02G423000	1.5837651850167		ODC1	TraesCS5D02G342000	6.30092065076889
	novel.2315	-1.27379909657577			TraesCS5B02G336200	5.90357718452289
	novel.2316	-1.02959505950239			TraesCS5A02G337400	7.7538290868841
ICD	TraesCS3B02G265700	1.3693321674512		SPE	TraesCS7D02G265900	2.29523535295121
	TraesCS3D02G237500	1.10901667783344		PAO	TraesCS2D02G549200	2.08413300703569
PGD	TraesCS4A02G455900	1.20811181547118			TraesCS2A02G548100	2.22316035011745
	TraesCS7A02G012000	1.45947049863926			TraesCS2D02G467300	1.60595114018562
	TraesCS7A02G092300	1.28848840999268			TraesCS2A02G467300	1.66918347876769
G6PD	novel.17469	1.66464819366025		SMOX	TraesCS3D02G251100	-1.24784042904832
	novel.18269	1.6599139062975			TraesCS7D02G375700	-2.37314898473984
	TraesCS6A02G211600	-1.00828128712802		GSR	TraesCS6A02G383800	1.26401337152007
GST	TraesCS4B02G044500	2.41963367912077			TraesCS6D02G368800	1.20486233731012
	TraesCS7D02G030700	5.96500177038			TraesCS6B02G423100	1.62590160927122
	TraesCS2B02G244100	2.16405857329395			TraesCS6B02G423000	1.69915093148563
	TraesCS3D02G133100	1.01817313119651			novel.2316	-3.56582958049147
	TraesCS7D02G078700	1.93331715588948		ICD	TraesCS3B02G265700	1.6986224032812
	TraesCS1D02G081200	1.02185334554349			TraesCS3D02G175100	1.25718516895594
	TraesCS1B02G269100	8.55124518956518			TraesCS3D02G237500	1.62358881900971
	TraesCS1B02G097400	1.24841496926219			TraesCS3A02G237100	1.80890328213661
	TraesCS3A02G309000	1.12416473968368		PGD	TraesCS7A02G012000	1.27610279194908
	TraesCS3B02G540200	6.84144945263231			TraesCS7A02G092300	1.23789666753009
	TraesCS3B02G152200	1.34990888489793		G6PD	TraesCS2A02G320400	1.35822838962994
	TraesCS3A02G129800	1.45557141256881			TraesCS2B02G362700	1.6052284672107
	TraesCS1A02G186500	1.13879690651163			novel.17469	1.97278741573155
	TraesCS3D02G430200	3.1383102487984			novel.18269	1.93772857099654
	TraesCS4D02G201200	1.66346875450667			TraesCS6A02G146500	-2.00193822697664
	TraesCS2A02G218700	2.96206574021767			TraesCS6A02G211600	-1.26646336172624
	TraesCS1B02G194900	4.7853920961438			TraesCS6D02G135800	-1.59655917289563
	TraesCS3D02G261100	1.79466156643835			TraesCS6B02G174700	-1.83502084445771
	TraesCS5D02G432600	6.63330034424629		GST	TraesCS4B02G044500	2.27739015879631
	TraesCS1B02G194100	1.07824141691303			TraesCS7D02G030700	4.79230223462064
	TraesCS4A02G103800	1.85363272607797			TraesCS3D02G133100	1.08251538555894
	TraesCS1A02G102800	1.21803501301878			TraesCS7D02G078700	2.00697530254106
	TraesCS3A02G309100	2.41075719045249			TraesCS1D02G081200	1.11650646154896
	TraesCS2A02G045400	7.51545692578963			TraesCS1B02G269100	4.36894112935508
	TraesCS4B02G059300	1.66478345951696			TraesCS1B02G097400	1.67932215067849
	TraesCS4A02G269600	1.54516140185879			TraesCS3B02G540200	3.86087665110421
	TraesCS4D02G042000	1.71206906477237			TraesCS3B02G152200	1.8270018488234
	TraesCS6B02G327100	1.83416823747067			TraesCS1A02G186500	1.41890539873757
	TraesCS7A02G477900	1.19518625081962			TraesCS3D02G430200	3.74617764334301
	TraesCS1D02G191100	6.22501987877873			TraesCS4D02G201200	1.70046645144849
	TraesCS1A02G186400	6.90956858313483			TraesCS2A02G218700	2.0774753298978
	TraesCS4D02G201100	1.84606230560142			TraesCS1B02G194900	4.92530764303737
	TraesCS5D02G030000	4.58456100165346			TraesCS3D02G261100	1.75399530511843
	TraesCS3D02G299900	1.1693497398081			TraesCS5D02G432600	8.73274312053519
	TraesCS7B02G084400	6.01474265091495			TraesCS1B02G194100	1.39235239120738
	TraesCS1A02G078800	3.60829528818692			TraesCS4A02G103800	2.22958477545461
	TraesCS2D02G044100	2.50845862371684			TraesCS3A02G309100	2.2521766552756
	TraesCS4D02G200700	5.48879177218955			TraesCS2A02G045400	6.34539697257949
	TraesCS1A02G103000	5.51436586013977			TraesCS4B02G059300	1.90929901110226
	TraesCS3A02G260800	10.2803503706717			TraesCS4A02G269600	1.07132446439904
	TraesCS5D02G440700	2.58776593143091			TraesCS4D02G042000	1.1676150225373
	TraesCS3B02G536100	12.3058175535493			TraesCS6B02G327100	1.70147753980692
	TraesCS5B02G259700	3.48843309194861			TraesCS7A02G477900	1.37043431236052
	TraesCS1A02G186800	1.82826948640018			TraesCS3A02G302300	2.43210672101929
	TraesCS5D02G254000	2.68046588847753			TraesCS7A02G374900	3.90269670098414
	TraesCS3B02G234100	4.07451484249827			TraesCS1A02G102900	3.65773873686962
	TraesCS3B02G334500	1.49486278359815			TraesCS1D02G191100	5.27898466304126
	TraesCS5B02G426300	2.43798639305667			TraesCS1A02G186400	9.3984133197603
	TraesCS1A02G187000	3.74256602325649			TraesCS6D02G127800	5.28410195020691
	TraesCS5D02G200100	1.40071472882978			TraesCS4D02G201100	2.30679412339964
	TraesCS3D02G487200	2.61691559873591			TraesCS5D02G030000	4.22262206317005
	TraesCS6D02G277300	1.22990105686335			TraesCS3D02G299900	1.21248987110183
	TraesCS5A02G247500	2.58348566527347			TraesCS5A02G424000	6.96587304125688
	TraesCS5B02G435000	1.93161227640389			TraesCS7B02G084400	8.33247672476383
	TraesCS5B02G244700	3.14205169841908			TraesCS1B02G194300	1.65674785774298
	TraesCS1D02G189700	2.41352334438398			TraesCS7B02G252500	4.08116983913513
	TraesCS3A02G488200	6.98923253854034			TraesCS1A02G078800	3.77984885254939
	TraesCS1A02G186100	4.50625997166121			TraesCS2D02G044100	2.46707992472604
	TraesCS1D02G094700	2.34708421031625			TraesCS4D02G200700	9.0735945181508
	TraesCS5A02G502500	1.33519821899864			TraesCS7D02G348500	4.11939169443485
	TraesCS4B02G059100	1.12918770319527			TraesCS2D02G589300	6.16729219222751
	TraesCS3D02G299700	1.15608300932739			TraesCS4B02G200100	1.3959370681653
	TraesCS3A02G437900	8.40380752822481			TraesCS3A02G260800	8.50076287138558
	TraesCS1D02G189600	1.01957840621941			TraesCS5D02G440700	2.13023454124278
	TraesCS5D02G432700	1.45933135756923			TraesCS3B02G536100	10.6331293438357
	TraesCS3D02G483000	8.82152293477776			TraesCS5B02G259700	2.61879707860238
	TraesCS7A02G034300	2.77302984298153			TraesCS1A02G186800	2.10045902397355
	TraesCS3D02G369600	7.24454468639414			TraesCS5D02G254000	2.47722458577452
	novel.1260	6.44475894205548			TraesCS3B02G234100	2.65253257250763
	TraesCS2B02G532600	-1.75152488102376			TraesCS3B02G334500	1.46802169479386
	TraesCS4D02G201300	-1.32852454178028			TraesCS1A02G187000	4.79449067372299
	TraesCS7B02G096300	-1.73903988310095			TraesCS3D02G486100	3.96250952462006
	TraesCS1D02G189800	-1.72829937738198			TraesCS1A02G186600	5.08438120587646
	TraesCS6B02G429400	-1.23515357269418			TraesCS5D02G200100	1.3957348428208
	TraesCS5D02G343100	-1.26281942038943			TraesCS6D02G277300	1.4915362316108
	TraesCS1A02G186700	-1.05906580539088			TraesCS5A02G247500	2.23173343550398
	TraesCS6B02G244500	-1.06672230552612			TraesCS3B02G490400	1.31661733274207
	TraesCS5D02G027500	-1.22784724757376			TraesCS1D02G095000	2.41342341186517
	TraesCS2A02G504300	-2.1080675067263			TraesCS5B02G244700	3.18341586042426
	TraesCS2D02G504900	-1.88445360287862			TraesCS1D02G189700	2.26150943542753
	novel.12353	-1.29271587930309			TraesCS3A02G488200	10.0630943077783
GGT	TraesCS2D02G321200	1.30776638211388			TraesCS1A02G186100	4.42896707747874
CD13	TraesCS5B02G270200	1.57729578116303			TraesCS1D02G094700	2.74148640118097
	TraesCS7D02G346000	-1.4231501858713			TraesCS4B02G059100	2.05180350048876
pepA	TraesCS6A02G357200	1.50697380372939			TraesCS3D02G299700	1.73627274084868
	TraesCS6B02G113800	4.00149344851572			TraesCS1D02G189600	1.69936205107612
	TraesCS1B02G230100	2.24247161334322			TraesCS4A02G454800	1.52967610367775
	TraesCS2A02G413300	4.13395221906247			TraesCS6A02G297400	1.35565811733678
	TraesCS1A02G095800	1.42662916935958			TraesCS5D02G432700	1.24250410134781
	TraesCS6D02G339200	1.85435556462272			TraesCS1B02G113500	7.95014687047925
	TraesCS6B02G389200	1.49037671439167			TraesCS3D02G483000	11.7162845629096
	novel.12226	1.09864386437691			TraesCS7A02G034300	2.79635637013186
	TraesCS1A02G249300	-1.56316179111438			novel.7749	4.9480722247634
	TraesCS2B02G503500	-4.79385516981716			novel.1260	5.46988533757964
	TraesCS2A02G479100	-3.21816623185779			novel.16664	1.26953622860079
RRM1	TraesCS6D02G357100	-1.1137772515405			TraesCS7D02G050800	-1.60115639126543
	TraesCS6B02G410800	-1.01326908669385			TraesCS2B02G532600	-2.9977924056803
	novel.4578	-1.60321309799942			TraesCS3B02G471600	-1.17008627753107
APX	TraesCS6A02G412900	1.32213894991675			TraesCS4A02G455000	-3.54355288117912
	TraesCS2A02G437700	4.19388864329825			TraesCS4D02G201300	-2.24304147445791
	TraesCS6B02G462300	1.63431670587545			TraesCS4B02G296500	-5.32814859314038
	TraesCS4A02G106300	3.03574888009995			TraesCS4B02G274400	-1.06367633225771
	TraesCS6D02G397200	1.38006963634441			TraesCS3D02G130700	-2.80523730040451
	TraesCS2B02G457600	6.18330435501039			TraesCS7B02G096300	-1.25938807410325
	TraesCS2D02G434500	3.25046661884402			TraesCS1D02G189800	-1.0698815741042
	TraesCS4B02G197900	2.11138204034968			TraesCS1D02G095400	-1.89105350584001
	TraesCS4D02G198500	2.76533345818788			TraesCS5A02G143500	-1.0983937273047
	TraesCS5A02G113100	2.40892203906045			TraesCS3D02G133200	-1.56527085773157
	TraesCS7A02G250500	-1.74482043384766			TraesCS4D02G041800	-1.24697484129439
	TraesCS7D02G249200	-1.93749579778832			TraesCS5D02G343100	-1.02169645874768
	TraesCS7B02G140600	-1.57264091014625			TraesCS4A02G103900	-3.16654591136809
GULO	TraesCS7B02G103000	6.11588439116458			TraesCS5D02G027500	-1.8441263873296
	TraesCS7A02G317500	6.22446565378593			TraesCS2A02G504300	-4.05663343007095
	TraesCS1D02G001600	1.40428926484909			TraesCS2D02G504900	-2.96033670946467
	TraesCS6D02G137300	3.70726092335636			novel.12353	-1.70567923506855
	TraesCS7A02G236800	1.70878061977598			novel.12957	-1.57421722562255
VTC2	TraesCS4A02G201200	-1.24752910825912			novel.5278	-1.50943942209086
	TraesCS5B02G111700	-1.15471669104069		GGT	TraesCS3A02G076500	-1.00619828725484
	TraesCS5D02G122900	-1.13339732779923		CCD13	TraesCS7B02G250100	-1.50282239631469
	TraesCS4D02G102200	-1.98710327912205			TraesCS7D02G346000	-1.94503545315737
	TraesCS4B02G105300	-1.91590080590418			TraesCS7A02G338800	-1.41400258357158
VTC4	TraesCS4D02G151200	1.13870728894295		pepA	TraesCS6A02G357200	1.64803448856156
AOX	TraesCS7D02G297700	2.04662465415143			TraesCS1A02G095800	1.56921360970541
	TraesCS7D02G361200	1.56899403699421			TraesCS6D02G339200	2.11771921088021
	TraesCS2B02G518200	1.08885115969605			TraesCS6B02G389200	1.63324884932683
	TraesCS7D02G517100	-2.00978408260086			TraesCS6A02G241800	-1.56878626633597
	TraesCS1D02G113500	-2.49892764057958			TraesCS1A02G249300	-1.63837950333084
	TraesCS1B02G132200	-1.26350031463004			TraesCS2B02G503500	-6.20754484665194
	TraesCS2A02G366400	-1.95331966381632			TraesCS2A02G479100	-4.73918431917886
	TraesCS7A02G202000	-1.40376133960071			TraesCS1B02G260000	-1.01703181666057
	TraesCS7D02G205100	-1.51541028734968			TraesCS6D02G223800	-1.46751829368134
	TraesCS3A02G386700	-1.1615184891351			TraesCS2D02G478400	-6.4828017631558
	TraesCS7B02G446700	-1.83151154362933		RRM1	TraesCS7D02G130500	-1.12271907601927
	TraesCS2B02G479000	-1.04725618443308			TraesCS4B02G151400	-1.14966561538716
	TraesCS2B02G517300	-3.30227920428301			novel.16166	-1.19494575431757
	TraesCS2A02G575300	-1.48980936513722			novel.4578	-1.54992412470703
	TraesCS1A02G259300	-1.88877578692113			novel.4616	-1.59022751490478
NADH	TraesCS7A02G277600	1.28394596678408			TraesCS7A02G204800	-1.15946250514316
	TraesCS4B02G010500	1.04475127413618			TraesCS7D02G207800	-1.27144760980606
	TraesCS7D02G277500	3.14984446385244		APX	TraesCS2A02G305600	1.56964833189707
	TraesCS7B02G175300	2.86120641741153			TraesCS2B02G322400	1.62821695098706
	TraesCS6B02G301300	-1.38894442515281			TraesCS4A02G106300	1.46726101385791
	TraesCS6D02G253900	-3.77457410356093			TraesCS2B02G457600	3.34865109254523
UGDH	TraesCS5D02G404300	1.75362828090652			TraesCS4B02G197900	1.59794441592491
	TraesCS5A02G394900	2.53349474525158			TraesCS4D02G198500	2.36645870237907
	TraesCS5B02G399800	1.83903948029912			TraesCS5A02G113100	2.52065129121685
	TraesCS4B02G050400	2.22982103597754			TraesCS6A02G412900	-1.08649631937138
	novel.3090	-2.12072172297464			TraesCS7A02G250500	-2.77112462146012
GMUG	TraesCS5D02G504800	7.34381520116808			TraesCS6B02G462300	-1.01948432679092
	TraesCS3A02G241000	3.55198465979514			TraesCS7D02G249200	-3.44124944414311
	TraesCS3D02G241300	6.62921019283183			TraesCS6D02G397200	-1.11501819598642
	TraesCS3B02G269200	5.57307879577163			TraesCS7B02G140600	-2.84795161366825
	TraesCS4A02G368600	6.26014719680743			TraesCS5B02G120200	-1.63473274175719
	TraesCS5B02G504000	13.1060317501061		GULO	TraesCS7B02G103000	4.34484265758745
	novel.11351	1.67567946111607			TraesCS7A02G317500	6.60420687770528
	TraesCS5A02G146400	-4.25360747164759			TraesCS6D02G137300	1.74141707404387
HK	TraesCS3D02G276000	1.51033867598697			TraesCS7A02G236800	1.02099504079724
	TraesCS1A02G122800	2.8239754933533			TraesCS7D02G199100	5.50068151532531
	TraesCS1B02G142000	5.52188471074673			TraesCS2D02G037100	3.50422580963445
	TraesCS1D02G123700	4.73686085393958			TraesCS6B02G109800	-1.14066152433008
	TraesCS3B02G309700	1.99134790058295		GME	TraesCS1B02G431500	-1.14812648143792
	TraesCS3B02G320500	-2.81094638047849			TraesCS1A02G402500	-1.0401762680781
	TraesCS3A02G286200	-1.81145692162512		VTC2	TraesCS3A02G394400	1.32219854186978
	TraesCS3B02G525400	-1.19982645807846			TraesCS4A02G201200	-1.52480085187747
PMM	TraesCS7D02G344700	1.6208425530062			TraesCS5B02G111700	-1.42658738595779
	TraesCS7A02G337000	3.24373920644157			TraesCS5D02G122900	-1.38635259407245
GMPP	TraesCS4B02G210300	2.07224951110617			TraesCS4D02G102200	-2.03686247036803
xylA	TraesCS7B02G008200	1.02282163429542			TraesCS4B02G105300	-2.27823128381064
	TraesCS6D02G226000	1.29641635141643			TraesCS5A02G107800	-1.31197584424801
	TraesCS2B02G137300	1.06944335726453		VTC4	TraesCS4D02G151200	1.0701413937614
	TraesCS2A02G117300	1.41013412597321		AOX	TraesCS7D02G297700	2.5953958308917
	TraesCS2D02G117900	1.93126023860441			TraesCS7D02G267500	1.00985231408095
	TraesCS6B02G280500	1.15734042598307			TraesCS7D02G517100	-1.72075114799712
	novel.9365	-1.8421526815024			TraesCS1D02G113500	-2.11483958155902
HK	TraesCS3D02G276000	1.51033867598697			TraesCS2A02G366400	-2.85254613022146
	TraesCS1A02G122800	2.8239754933533			TraesCS7A02G202000	-1.1346106886402
	TraesCS1B02G142000	5.52188471074673			TraesCS3A02G386700	-1.03172480328272
	TraesCS1D02G123700	4.73686085393958			TraesCS2D02G586000	-1.01975230440797
	TraesCS3B02G309700	1.99134790058295			TraesCS2A02G575300	-1.44651300980863
	TraesCS3B02G320500	-2.81094638047849			TraesCS1A02G259300	-1.49964467907574
	TraesCS3A02G286200	-1.81145692162512		GLDH	novel.6580	-1.45091640057691
	TraesCS3B02G525400	-1.19982645807846		NADH	TraesCS7D02G277500	2.58151891258848
SCRK	TraesCS1D02G108300	2.15842074306999			TraesCS7B02G175300	3.22326686015653
	TraesCS1A02G106600	1.28620783076737			TraesCS6B02G301300	-1.58030711089686
	TraesCS3A02G400000	2.38121257570702			TraesCS6D02G254000	-1.1985497531191
	TraesCS1B02G124100	1.11098815200336			TraesCS6D02G253900	-2.29987635765181
	TraesCS2B02G004000	-1.50060098523674		UGDH	TraesCS5D02G404300	2.1321223665431
	TraesCS5B02G285500	-1.12793419889367			TraesCS5A02G394900	2.7942325658735
	TraesCS2A02G013600	-1.87406532759284			TraesCS5B02G399800	2.24449936686708
	TraesCS2D02G014800	-2.25449971038725			TraesCS4B02G050400	2.41332158356444
	TraesCS2A02G111500	-1.39335012143089		GMUG	TraesCS5D02G504800	6.21529556413542
MPI	TraesCS3B02G039000	1.12157036872253			TraesCS3A02G241000	2.86422924272268
	TraesCS3A02G044800	2.19257487882643			TraesCS3D02G241300	4.24677550357586
PFK9	TraesCS3B02G311900	2.41904840037719			TraesCS3B02G269200	6.30352711257772
	TraesCS3A02G277700	3.21869330589724			TraesCS4A02G368600	4.82563897309672
	TraesCS5B02G225200	1.14435527308144			TraesCS5B02G504000	8.03494116204704
	TraesCS5D02G254300	1.3272895687066			novel.11351	1.2580653789571
	TraesCS5A02G247700	1.87637543829704			TraesCS5A02G146400	-1.73038000702422
	TraesCS5A02G358700	1.76318980560039			TraesCS5B02G145200	-2.44212557321199
	TraesCS2D02G331200	5.49198952234378		HK	TraesCS1D02G344600	1.09153156174175
	TraesCS2B02G350500	4.80943724919338			TraesCS2D02G006600	1.09549829883855
	TraesCS5D02G437200	3.6103300542582			TraesCS1B02G142000	6.52445798740289
	TraesCS5A02G226600	1.43746252889311			TraesCS1D02G123700	4.03185779744633
	TraesCS5B02G431200	3.26941667749621			TraesCS3B02G309700	1.81889436897846
	TraesCS5D02G367700	2.73121150845617			TraesCS3B02G320500	-7.71447903570287
	TraesCS5B02G361100	1.90811761713064			TraesCS3A02G286200	-1.32044934277622
	TraesCS2A02G331700	4.74348514519169			TraesCS2B02G016000	-1.58829943427477
	TraesCS3D02G278000	3.50871833170641			TraesCS3B02G525400	-1.05841381330764
	TraesCS3B02G126400	1.31048353973969		PMM	TraesCS2D02G593400	1.04911749653357
	TraesCS5D02G254100	10.5421230916171			TraesCS7A02G337000	1.2472529421343
FBP	TraesCS1D02G274200	1.50111307072576		GMPP	TraesCS4B02G210300	2.19217392625525
	TraesCS3D02G370700	-1.4485837251866		SORD	TraesCS7B02G167500	-1.33051455469649
	TraesCS3A02G377600	-1.58430901168902			TraesCS7A02G269300	-1.68148665743438
	TraesCS7A02G484200	-1.64646338817003		xylA	TraesCS6D02G226000	1.07503603810587
	TraesCS3D02G544700	-1.91963437260895			TraesCS2A02G117300	1.20640453052877
	TraesCS3B02G410400	-1.49024405825006			TraesCS7A02G110400	1.18237258692679
	TraesCS1D02G053400	-1.60455944244305			TraesCS2D02G117900	1.15215308822775
PFP	TraesCS2D02G197100	1.07469476410401			TraesCS6B02G280500	1.0039519486559
	TraesCS2A02G190900	1.33743827188268			novel.9365	-2.78836495219875
	novel.8846	1.46611397442972			novel.1337	-1.62501556854367
	TraesCS5A02G072700	-1.26182411315597		HK	TraesCS1D02G344600	1.09153156174175
	TraesCS7B02G193600	-2.45071373938569			TraesCS2D02G006600	1.09549829883855
	TraesCS7D02G228500	-2.15277872853057			TraesCS1B02G142000	6.52445798740289
	TraesCS7A02G226000	-2.59923006476554			TraesCS1D02G123700	4.03185779744633
	novel.13633	-1.33594943417555			TraesCS3B02G309700	1.81889436897846
ALDO	TraesCS3B02G423200	1.37683143004163			TraesCS3B02G320500	-7.71447903570287
	TraesCS3D02G384000	1.87679326810027			TraesCS3A02G286200	-1.32044934277622
	TraesCS3A02G391500	2.12788414726004			TraesCS2B02G016000	-1.58829943427477
	TraesCS3D02G384100	1.80102092419751			TraesCS3B02G525400	-1.05841381330764
	TraesCS3D02G026400	1.43007949028042		SCRK	TraesCS7D02G191500	1.0718645951595
	TraesCS3D02G383700	1.55638612995268			TraesCS7A02G190500	1.09736339903342
	TraesCS3B02G025200	1.31359906947415			TraesCS1D02G108300	2.4847757269511
	TraesCS3A02G391100	1.84413191361812			TraesCS1A02G106600	1.5161412909635
	TraesCS3A02G020300	1.29192659488361			TraesCS7B02G095400	1.19988254167674
	TraesCS3B02G422900	1.56410251629523			TraesCS1B02G124100	1.13561354963049
	TraesCS5A02G108000	-2.40807282661389			TraesCS3A02G365700	-1.57098214006475
	TraesCS7D02G377400	-1.93566256346664			TraesCS2B02G004000	-2.09975106368871
	TraesCS5B02G115300	-2.1325074062168			TraesCS5B02G285500	-1.00061591491887
	TraesCS5D02G122700	-2.3403377935666			TraesCS7D02G315500	-1.36449655193122
	TraesCS7A02G381100	-1.91544933620559			TraesCS2A02G013600	-3.52830174126951
	TraesCS7B02G283000	-1.93624151516521			TraesCS2D02G014800	-2.12101645469393
TPI	TraesCS3B02G392100	1.31613751304139			TraesCS7B02G219800	-1.71744152707387
	TraesCS2D02G601500	1.22476599835536		MPI	TraesCS4A02G163500	-1.09764756183142
	TraesCS6D02G083600	1.3905493975829		PFK9	TraesCS3B02G311900	2.03592459458978
	TraesCS3D02G353600	1.23374349142071			TraesCS1A02G344000	1.08487973124318
	TraesCS2A02G372000	-1.10215252099515			TraesCS3A02G277700	2.16245591494799
USP	TraesCS7B02G319900	2.08470974317115			TraesCS5B02G225200	1.3420360733457
	TraesCS7D02G412100	1.37158112017605			TraesCS2D02G331200	5.33916497908485
	novel.14987	1.00315545806344			TraesCS2B02G350500	5.2369682688476
	novel.8531	-1.07796716309036			TraesCS5D02G437200	3.95318186145564
GLCAK	TraesCS3B02G476000	2.26444104471428			TraesCS5A02G226600	1.57950089961775
	TraesCS3A02G442200	1.93433311237791			TraesCS5B02G431200	1.51956030174759
	TraesCS6B02G096000	2.13771223668475			TraesCS5D02G367700	1.30691564170464
	TraesCS3D02G434900	2.58432224318226			TraesCS2A02G331700	3.92672278999753
	TraesCS2B02G289700	-3.0162251151671			TraesCS7D02G101300	1.36222734334624
	TraesCS2D02G270000	-2.56125972127421			TraesCS3D02G278000	2.6000257080936
ALDH	TraesCSU02G066700	2.92716399858755			TraesCS3B02G126400	1.44607322168531
	TraesCS6D02G272400	11.8879348240621			TraesCS5D02G254100	8.53113511407448
	TraesCS4D02G094500	1.727655040944			TraesCS5A02G247800	-1.31214700385631
	TraesCS2A02G388900	3.12322256394991			TraesCS5D02G254200	-1.53661395306542
	TraesCS2D02G386700	1.38091934460083			novel.3765	-1.11459087759944
	TraesCS2B02G406900	4.67741164263406		FBP	TraesCS7D02G471600	-1.49509601173292
	TraesCS4A02G219900	1.90577104490027			TraesCS3D02G370700	-2.42978426189891
	TraesCS4B02G098300	1.03514337154102			TraesCS3A02G377600	-2.99669998020293
	TraesCS5D02G127300	5.26442867810425			TraesCS7A02G484200	-1.61949642518927
	TraesCS5B02G210100	5.95520837836852			TraesCS3D02G544700	-1.71830891555091
	TraesCS5A02G213600	4.78264010888207			TraesCS4B02G211400	-2.46366493951981
	TraesCS5D02G218400	6.67568785208552			TraesCS3B02G410400	-2.98810042621358
	novel.3901	12.4279327577944			TraesCS1D02G053400	-1.30063138540409
	TraesCS6D02G222300	-1.23338699235787			TraesCS4A02G093100	-2.51100641099332
	TraesCS6B02G284600	-1.65924184488021			TraesCS4D02G212000	-2.39628947499188
	novel.7703	-2.46589739971975		PFP	TraesCS7D02G200800	1.49550739502188
	novel.13640	-2.12549206934856			TraesCS6B02G307200	1.19648196860309
HAO	TraesCS3A02G454900	3.26467287929943			TraesCS7B02G104400	1.2179442017743
	TraesCS3B02G493700	1.67365895832611			TraesCS6A02G279100	1.15734971919027
	TraesCS2A02G467700	2.3664668966723			TraesCS6D02G259500	2.28028627102625
	TraesCS5D02G274300	1.04709914503191			TraesCS7A02G198200	1.22675671078996
	TraesCS2B02G490700	1.89575963198317			novel.8846	2.06794484205813
	TraesCS3D02G447600	1.9835860301445			TraesCS7D02G228500	-2.77968857416717
	TraesCS2B02G194600	-1.91561260160981			TraesCS7A02G226000	-4.00075688955514
	TraesCS2A02G250800	-1.25192218496306			novel.13633	-2.34550411963956
	TraesCS5D02G432900	-1.28342879844046		ALDO	TraesCS3B02G423200	1.08484608992992
	TraesCS2D02G251800	-1.21172177552241			TraesCS3D02G384000	2.17850162686421
	TraesCS5A02G424400	-1.64364845227405			TraesCS3A02G391500	1.97627671035071
	TraesCS5B02G426500	-1.62358010762728			TraesCS3D02G384100	1.41256718726999
CAT	TraesCSU02G105300	1.56817243156681			TraesCS3D02G383700	1.47627331178514
	TraesCS7A02G549800	1.98965854927659			TraesCS3B02G025200	1.35216070890475
	TraesCS6B02G056800	2.64507049655777			TraesCS3A02G391100	1.59989958646672
	TraesCS6A02G041700	2.09800412061826			TraesCS3B02G422900	1.27139442047123
	TraesCS6D02G048300	2.69533754879479			TraesCS5A02G108000	-4.31528322478623
	TraesCS7B02G473400	2.26387631499291			TraesCS4A02G206400	-2.39073656385889
	TraesCS7B02G167600	-1.21286729650908			TraesCS7D02G377400	-4.36262435080453
					TraesCS5B02G115300	-4.10535380536748
					TraesCS4D02G107400	-2.37648300621081
					TraesCS4B02G109900	-2.63184478461178
					TraesCS5D02G122700	-3.80492022828264
					TraesCS7A02G381100	-4.34707888523349
					TraesCS7B02G283000	-4.1460122747478
				TPI	TraesCS3B02G392100	1.6510273707387
					TraesCS6D02G083600	1.17051321516335
					TraesCS3D02G353600	1.06025674710941
					TraesCS5A02G324200	-1.21920001423842
					TraesCS5B02G324800	-1.57369402911978
					TraesCS5D02G331100	-1.22128175330377
					novel.13859	-1.10884150786198
				USP	TraesCS7A02G419300	1.0487720905263
					TraesCS7B02G319900	2.23595418042461
					novel.14441	1.40130656548443
					novel.14772	-1.37809068483776
				GLCAK	TraesCS3B02G476000	1.89923168641237
					TraesCS3A02G442200	1.21408459054953
					TraesCS6B02G096000	1.83005144801715
					TraesCS3D02G434900	1.42747900103417
					TraesCS2B02G289700	-3.30754155692234
					TraesCS2D02G270000	-2.56461900839866
					TraesCS2D02G280100	-4.0582540749724
					TraesCS6A02G071400	-1.25810052130555
				ALDH	TraesCSU02G066700	2.15616737582235
					TraesCS6D02G272400	9.301334361504
					TraesCS4D02G094500	1.46893457062194
					TraesCS2A02G388900	3.00093138179499
					TraesCS2D02G386700	1.21528006269728
					TraesCS2B02G406900	5.69177372755526
					TraesCS4A02G219900	1.5667194645444
					TraesCS7B02G116800	1.70895234172995
					TraesCS6D02G222000	1.06057680712623
					novel.12896	8.34050250053566
					TraesCS5B02G210100	5.32121780842664
					TraesCS5A02G213600	4.62375577314755
					TraesCS5D02G218400	6.10361272765677
					novel.1126	1.32180368520212
					novel.3901	8.01019043472231
					TraesCS6D02G222300	-1.15290515190046
					TraesCS6B02G284600	-1.88561932602627
					novel.7703	-4.14678415106463
					novel.13640	-3.26990810106323
					novel.13780	-1.92733952311023
					novel.13943	-1.78385671403563
				HAO	TraesCS3A02G454900	3.17059850748745
					TraesCS3B02G493700	1.47617263064305
					TraesCS2D02G467700	4.8505237571869
					TraesCS2A02G467700	2.65181592155214
					TraesCS2B02G490700	1.79157904826894
					TraesCS3D02G447600	3.54050288974548
					TraesCS2B02G194600	-1.60523660150309
					TraesCS2A02G250800	-2.70253083510048
					TraesCS5D02G432900	-2.79879546682731
					TraesCS2D02G251800	-2.81490307305628
					TraesCS5A02G424400	-3.33836555061301
					TraesCS5B02G426500	-3.2212467157779
					TraesCS2B02G264100	-2.28454645702373
				CAT	TraesCSU02G105300	1.70481222891024
					TraesCS7A02G549800	1.74189947698348
					TraesCS6B02G056800	1.88447560593586
					TraesCS6A02G041700	3.06379647934004
					TraesCS6D02G048300	2.55010284607177
					TraesCS7B02G473400	2.08498418633875
					TraesCS7B02G167600	-2.8136272428433
					TraesCS4D02G322700	-1.47596971053369
					TraesCS4B02G325800	-2.44354687098622
					TraesCS7D02G269900	-2.60437894492858
					TraesCS5A02G498000	-2.22416903650853
					TraesCS7A02G269400	-2.89011217626687
